# Supplementary material for: RIPK3 Is Largely Dispensable for RIG-I-Like Receptor- and Type I Interferon-Driven Transcriptional Responses to Influenza A Virus in Murine Fibroblasts
Source: PLoS One. 2016 Jul 8;11(7):e0158774. doi: 10.1371/journal.pone.0158774 (PMC4938532; doi:10.1371/journal.pone.0158774)
Supplement: S4 Table — Top 20 upregulated or downregulated genes dependent on RIPK3 are colored in red or green, respectively. In addition, genes upregulated or downregulated dependently on RIPK3 kinase activity are colored in pink or light green, respectively. Related to Fig 3A and 3B and 3C and 3D. (XLSX) [file pone.0158774.s006.xlsx]

## Sheet: Supp. Table 4
Supplementary Table 4: (see Figure 3A)
1690 genes regulated by infection with PR8-ΔNS1 in ripk3+/+ MEFs or ripk3+/+ MEFs treated with RIPK3 inhibitor or ripk3-/- MEFs
Genes upregulated or downregulated dependent on RIPK3 are colored in red or green, respectively.
In particular, genes upregulated or downregulated dependently on RIPK3 kinase activity are colored in pink or light green, respectively.
Within these groups, genes are ranked by log2 fold-change in ripk3+/+ at 18 h (Column G)
				Log (base2) fold changes											P-Values from limma analysis											Log (base2) scale normalized expression estimates
				Ripk3 +/+, time from infection			Ripk3 -/-, time from infection			Ripk3 +/+ plus RIP3i, time from infection			basal (time 0), _ vs. Ripk3 +/+		Ripk3 +/+, time from infection			Ripk3 -/-, time from infection			Ripk3 +/+ plus RIP3i, time from infection			basal (time 0), __ vs. Ripk3 +/+		Ripk3 +/+				Ripk3 +/+ plus RIP3i				Ripk3 -/-
ProbeName	ENTREZID	SYMBOL	GENENAME	6 hours	12 hours	18 hours	6 hours	12 hours	18 hours	6 hours	12 hours	18 hours	Ripk3 -/-	Ripk3 +/+ plus RIP3i	6 hours	12 hours	18 hours	6 hours	12 hours	18 hours	6 hours	12 hours	18 hours	Ripk3 -/-	Ripk3 +/+ plus RIP3i	basal	6 hours	12 hours	18 hours	basal	6 hours	12 hours	18 hours	basal	6 hours	12 hours	18 hours
A_51_P144180	15977	Ifnb1	interferon beta 1, fibroblast	6.04498	10.6518	10.7393	5.09627	10.6183	10.5333	6.18178	10.8034	10.6822	-0.453421	-0.237975	1.52033e-19	1.9552e-23	1.71759e-23	2.24402e-18	2.05522e-23	2.33431e-23	1.06792e-19	1.56321e-23	1.86913e-23	0.000795001	0.0456503	7.25876	13.3037	17.9106	17.9981	7.02078	13.2026	17.8242	17.7029	6.80534	11.9016	17.4237	17.3386
A_51_P509573	20303	Ccl4	chemokine (C-C motif) ligand 4	3.16831	8.12656	8.29081	0.578327	3.83773	3.73465	3.05364	8.3231	8.58725	3.89628	-0.044353	2.12078e-16	7.48269e-23	5.45097e-23	1.00955e-05	1.04607e-17	1.6051e-17	3.77754e-16	5.12562e-23	3.12544e-23	8.24388e-18	0.633081	6.9135	10.0818	15.0401	15.2043	6.86915	9.92279	15.1923	15.4564	10.8098	11.3881	14.6475	14.5444
A_55_P2030077	15974	Ifnab	interferon alpha B	3.46747	8.70375	8.2818	2.51556	8.48662	7.75069	3.06019	8.53369	7.85473	0.127022	0.396453	4.20602e-17	2.0578e-23	4.51993e-23	6.36453e-15	3.07002e-23	1.29067e-22	2.984e-16	2.81258e-23	1.04508e-22	0.177217	0.000448939	7.41768	10.8851	16.1214	15.6995	7.81413	10.8743	16.3478	15.6689	7.5447	10.0603	16.0313	15.2954
A_51_P355829	15967	Ifna4	interferon alpha 4	3.66479	8.73983	8.23665	2.83721	8.70041	7.8957	3.82191	9.24968	8.37174	-0.00203718	-0.0402659	1.78965e-15	2.04994e-21	5.23548e-21	9.53207e-14	2.20184e-21	1.02138e-20	9.29053e-16	8.36068e-22	4.04815e-21	0.986755	0.743245	6.3299	9.99469	15.0697	14.5666	6.28963	10.1115	15.5393	14.6614	6.32786	9.16508	15.0283	14.2236
A_55_P2030194	15968	Ifna5	interferon alpha 5	3.32298	8.54333	8.21585	2.68128	8.72807	8.03607	2.98017	8.59077	7.9187	-0.166795	0.338056	4.40769e-16	1.51046e-22	2.80389e-22	1.2519e-14	1.07656e-22	3.97941e-22	2.41545e-15	1.38369e-22	5.02259e-22	0.115401	0.00389038	7.44138	10.7644	15.9847	15.6572	7.77944	10.7596	16.3702	15.6981	7.27459	9.95586	16.0027	15.3107
A_55_P2166020	230396	Ifna13	interferon alpha 13	3.25562	8.50308	8.00639	2.18288	8.17986	7.41387	2.7471	8.29334	7.55932	0.235221	0.420611	1.63939e-16	4.33109e-23	1.1231e-22	8.29217e-14	7.99938e-23	3.79235e-22	2.33408e-15	6.43177e-23	2.7886e-22	0.0213385	0.000323494	6.47135	9.72697	14.9744	14.4777	6.89196	9.63906	15.1853	14.4513	6.70657	8.88945	14.8864	14.1204
A_66_P127574	242519	Ifna12	interferon alpha 12	2.9838	8.29902	7.8326	2.32461	8.31259	7.60441	2.7822	8.56872	7.74355	-0.0505206	0.231716	1.81978e-13	1.9986e-20	4.98376e-20	8.24931e-12	1.94767e-20	7.94922e-20	5.33495e-13	1.20571e-20	5.97013e-20	0.707999	0.0995912	6.48443	9.46823	14.7834	14.317	6.71614	9.49834	15.2849	14.4597	6.43391	8.75852	14.7465	14.0383
A_55_P2030171	15965	Ifna2	interferon alpha 2	2.75847	8.07216	7.65961	2.106	8.14598	7.429	2.63379	8.4277	7.74272	-0.0697223	0.0880773	9.09172e-14	4.39712e-21	1.00771e-20	5.67104e-12	3.80767e-21	1.63363e-20	1.85561e-13	2.22415e-21	8.49675e-21	0.559918	0.462915	7.1209	9.87937	15.1931	14.7805	7.20898	9.84277	15.6367	14.9517	7.05118	9.15718	15.1972	14.4802
A_55_P1964960	77125	Il33	interleukin 33	1.29301	5.8847	7.19556	0.892793	5.07315	6.24039	1.12433	5.77564	7.29228	-0.190004	-0.200406	4.39343e-09	3.59979e-19	1.50394e-20	6.76625e-07	3.73202e-18	1.42599e-19	3.123e-08	4.83516e-19	1.21786e-20	0.111708	0.0948426	7.6428	8.93581	13.5275	14.8384	7.44239	8.56672	13.218	14.7347	7.4528	8.34559	12.5259	13.6932
A_55_P2118441	17857	Mx1	myxovirus (influenza virus) resistance 1	2.56458	7.2121	6.96987	2.43096	7.40231	7.20688	2.41757	7.51933	7.0235	-0.386365	0.119214	2.9952e-12	3.01347e-19	5.16525e-19	6.74854e-12	1.99842e-19	3.04809e-19	7.33735e-12	1.56023e-19	4.5771e-19	0.0122448	0.396208	8.8197	11.3843	16.0318	15.7896	8.93892	11.3565	16.4582	15.9624	8.43334	10.8643	15.8356	15.6402
A_55_P2030174	15962	Ifna1	interferon alpha 1	1.91956	7.11304	6.61942	1.3091	7.06544	6.28316	1.77607	7.45945	6.57717	0.080463	0.185965	1.97433e-12	2.50438e-21	7.80849e-21	6.05817e-10	2.78494e-21	1.77991e-20	6.43126e-12	1.1805e-21	8.64016e-21	0.430958	0.0803802	7.1385	9.05806	14.2515	13.7579	7.32447	9.10053	14.7839	13.9016	7.21897	8.52807	14.2844	13.5021
A_52_P452689	11910	Atf3	activating transcription factor 3	1.49682	5.67913	6.61195	0.683255	4.8139	5.31549	1.40606	6.02972	6.78896	0.397228	-0.13684	1.54423e-10	1.67916e-19	1.52058e-20	6.53739e-06	2.27488e-18	4.76961e-19	3.88183e-10	6.52222e-20	1.00157e-20	0.00149957	0.205853	8.88959	10.3864	14.5687	15.5015	8.75275	10.1588	14.7825	15.5417	9.28682	9.97007	14.1007	14.6023
A_51_P123625	16365	Irg1	immunoresponsive gene 1	1.83701	6.16951	6.49973	0.637966	3.72895	4.13318	1.42524	6.68744	7.2441	2.53524	0.565955	3.48335e-13	1.97689e-21	8.66545e-22	1.34108e-06	5.58789e-18	1.10472e-18	1.66054e-11	5.52288e-22	1.55825e-22	2.3668e-15	5.80883e-06	6.81445	8.65147	12.984	13.3142	7.38041	8.80565	14.0679	14.6245	9.3497	9.98767	13.0786	13.4829
A_55_P2030186	15970	Ifna7	interferon alpha 7	1.67657	6.92554	6.47295	1.11478	7.03325	6.31894	1.46602	6.73599	6.02532	0.169973	0.326435	4.49124e-12	1.05574e-21	3.07452e-21	1.91551e-09	8.27037e-22	4.49928e-21	3.40119e-11	1.63756e-21	9.54578e-21	0.0827599	0.00266158	6.6076	8.28417	13.5331	13.0806	6.93403	8.40005	13.67	12.9594	6.77757	7.89235	13.8108	13.0965
A_52_P327664	229898	Gbp5	guanylate binding protein 5	1.78664	5.98062	6.36964	1.79325	5.94024	5.91623	1.65859	6.59901	6.90388	-0.29255	0.370186	2.02788e-10	1.61902e-18	5.99599e-19	1.92027e-10	1.80142e-18	1.92007e-18	6.04389e-10	3.43204e-19	1.68295e-19	0.0340429	0.00977642	7.95859	9.74523	13.9392	14.3282	8.32877	9.98737	14.9278	15.2327	7.66604	9.45929	13.6063	13.5823
A_55_P1996365	404549	Ifna14	interferon, alpha 14	1.63641	6.78597	6.31585	1.291	6.9491	6.16973	1.58328	7.35955	6.55238	-0.023148	0.0523545	3.81615e-10	1.08772e-19	3.3772e-19	1.15313e-08	7.47547e-20	4.88533e-19	6.18626e-10	3.02004e-20	1.89072e-19	0.850212	0.670024	7.46315	9.09956	14.2491	13.779	7.51551	9.09879	14.8751	14.0679	7.44001	8.731	14.3891	13.6097
A_55_P2049196	230398	Gm13280	predicted gene 13280	1.86526	6.8743	6.2721	1.23064	6.81655	5.96002	1.86785	7.32223	6.48933	-0.0535355	-0.0672983	2.40984e-12	3.35679e-21	1.42999e-20	1.18618e-09	3.8358e-21	3.20292e-20	2.35948e-12	1.23692e-21	8.34892e-21	0.592556	0.502271	6.56284	8.4281	13.4371	12.8349	6.49554	8.36338	13.8178	12.9849	6.5093	7.73994	13.3259	12.4693
A_55_P2086433	231655	Oasl1	2'-5' oligoadenylate synthetase-like 1	2.08976	5.49511	5.8747	2.19737	5.42056	5.60909	1.91855	5.63151	6.05739	0.00276203	-0.0275808	2.35441e-12	6.77259e-19	2.36153e-19	1.09404e-12	8.39984e-19	4.89949e-19	8.61829e-12	4.60083e-19	1.45649e-19	0.980218	0.804633	11.7201	13.8098	17.2152	17.5948	11.6925	13.611	17.324	17.7499	11.7228	13.9202	17.1434	17.3319
A_55_P2158404	22169	Cmpk2	cytidine monophosphate (UMP-CMP) kinase 2, mitochondrial	2.56328	6.27543	5.76912	2.38634	6.36756	5.7642	2.10029	6.41956	6.71204	-0.269931	-0.0235213	3.0348e-13	2.53206e-19	9.54171e-19	9.09288e-13	2.01186e-19	9.67095e-19	6.35734e-12	1.76953e-19	8.75858e-20	0.0357677	0.844079	8.3132	10.8765	14.5886	14.0823	8.28968	10.39	14.7092	15.0017	8.04327	10.4296	14.4108	13.8075
A_51_P161021	15958	Ifit2	interferon-induced protein with tetratricopeptide repeats 2	1.26796	5.27032	5.62951	1.41941	5.72656	5.9397	1.32618	5.677	5.91267	-0.534375	-0.0114168	3.3223e-10	9.03327e-20	3.18897e-20	6.24965e-11	2.43434e-20	1.36646e-20	1.71423e-10	2.79262e-20	1.4686e-20	2.95253e-05	0.903384	10.8036	12.0715	16.0739	16.4331	10.7922	12.1183	16.4692	16.7048	10.2692	11.6886	15.9958	16.2089
A_55_P2035509	236312	Pyhin1	pyrin and HIN domain family, member 1	1.08412	5.47518	5.61995	1.30775	5.75361	5.93011	0.995949	5.50724	5.42179	0.579842	-0.198618	3.38847e-08	6.94079e-19	4.59919e-19	2.41481e-09	3.17444e-19	1.9707e-19	1.07564e-07	6.33037e-19	8.10023e-19	7.40917e-05	0.0884602	7.27945	8.36357	12.7546	12.8994	7.08084	8.07678	12.5881	12.5026	7.8593	9.16705	13.6129	13.7894
A_55_P2111790	14579	Gem	GTP binding protein (gene overexpressed in skeletal muscle)	0.714438	4.46783	5.60387	0.485995	4.04878	5.09773	0.586664	4.59385	5.90739	-0.0754225	0.225877	8.52388e-06	2.11671e-17	5.97836e-19	0.000474629	9.93634e-17	2.6574e-18	7.57083e-05	1.36699e-17	2.60175e-19	0.506405	0.0588062	8.7326	9.44704	13.2004	14.3365	8.95848	9.54514	13.5523	14.8659	8.65718	9.14317	12.706	13.7549
A_52_P670026	58185	Rsad2	radical S-adenosyl methionine domain containing 2	3.6001	5.86569	5.48298	3.42614	5.88968	5.37819	3.42167	5.82006	5.43668	0.107568	-0.0426145	3.9172e-15	1.8558e-18	5.36955e-18	8.4688e-15	1.74021e-18	7.27481e-18	8.64237e-15	2.09876e-18	6.1362e-18	0.401487	0.737191	11.7927	15.3928	17.6584	17.2757	11.7501	15.1717	17.5701	17.1868	11.9003	15.3264	17.7899	17.2785
A_55_P2049867	54199	Ccrl2	chemokine (C-C motif) receptor-like 2	0.581351	4.75424	5.48075	0.74637	4.58588	5.02438	0.387169	4.95893	5.5417	0.39035	0.451242	0.00195579	1.84283e-15	1.9937e-16	0.000220716	3.23376e-15	7.77312e-16	0.0254574	9.54121e-16	1.67645e-16	0.0244453	0.0110904	7.08323	7.66459	11.8375	12.564	7.53448	7.92164	12.4934	13.0762	7.47358	8.21995	12.0595	12.498
A_51_P284608	16149	Cd74	CD74 antigen (invariant polypeptide of major histocompatibility complex, class II antigen-associated)	-0.0453873	3.30962	5.2329	0.177614	2.15988	3.77272	0.0503263	3.13379	4.94678	0.956374	-0.0185163	0.6469	2.948e-16	2.18893e-19	0.0865417	2.24226e-13	3.78042e-17	0.611785	6.92642e-16	5.31417e-19	3.72863e-08	0.851342	7.17938	7.13399	10.489	12.4123	7.16086	7.21119	10.2947	12.1076	8.13575	8.31337	10.2956	11.9085
A_51_P514085	17858	Mx2	myxovirus (influenza virus) resistance 2	2.61137	5.03096	5.22164	2.60094	5.13952	5.16666	2.54506	5.01508	5.02481	-0.71598	0.0558929	1.59319e-14	5.48041e-19	3.04782e-19	1.69531e-14	3.91368e-19	3.60163e-19	2.37474e-14	5.76041e-19	5.58705e-19	2.11986e-06	0.580454	12.5121	15.1235	17.5431	17.7338	12.568	15.1131	17.5831	17.5928	11.7962	14.3971	16.9357	16.9628
A_55_P1972582	240921	Gm4955	predicted gene 4955	1.23885	4.81369	4.81564	1.43662	5.25839	5.48597	1.16636	4.98769	5.02033	-0.0951075	-0.191353	3.1795e-08	3.99739e-17	3.97213e-17	3.97521e-09	9.96922e-18	5.1184e-18	7.25464e-08	2.28839e-17	2.06542e-17	0.45601	0.143904	8.26345	9.5023	13.0771	13.0791	8.0721	9.23846	13.0598	13.0924	8.16834	9.60496	13.4267	13.6543
A_51_P165182	74481	Batf2	basic leucine zipper transcription factor, ATF-like 2	1.39999	5.64438	4.81331	1.83061	5.89786	5.38074	1.2348	5.61967	5.12299	0.122097	-0.106932	7.78872e-12	2.7528e-21	3.41263e-20	1.28962e-13	1.37416e-21	5.86465e-21	5.14596e-11	2.95055e-21	1.27413e-20	0.144201	0.197422	7.53276	8.93275	13.1771	12.3461	7.42583	8.66064	13.0455	12.5488	7.65486	9.48547	13.5527	13.0356
A_55_P2152566	109032	Sp110	Sp110 nuclear body protein	0.811251	4.34096	4.79655	1.04403	4.69232	4.85383	0.727475	4.53219	4.97528	-0.2743	-0.180474	1.55461e-07	1.63867e-18	3.39755e-19	4.76925e-09	4.8046e-19	2.81726e-19	6.4815e-07	8.30678e-19	1.90756e-19	0.00865058	0.066569	8.97892	9.79017	13.3199	13.7755	8.79845	9.52592	13.3306	13.7737	8.70462	9.74865	13.3969	13.5585
A_51_P385099	21926	Tnf	tumor necrosis factor	0.227704	3.53866	4.64817	0.622227	3.17641	3.77122	0.0991378	3.89816	5.12939	1.22793	0.31717	0.0266037	5.31129e-17	7.2692e-19	5.5441e-06	2.88789e-16	1.95426e-17	0.30323	1.16128e-17	1.5367e-19	5.85124e-10	0.00366572	6.43324	6.66094	9.97189	11.0814	6.75041	6.84955	10.6486	11.8798	7.66117	8.2834	10.8376	11.4324
A_52_P463977	68487	Tmem140	transmembrane protein 140	1.47007	4.58474	4.59277	1.64231	4.3571	4.31497	1.28237	4.53448	4.47009	-0.439397	0.0386773	2.26166e-09	6.64509e-17	6.46497e-17	4.52903e-10	1.47703e-16	1.72002e-16	1.56888e-08	7.8997e-17	9.88654e-17	0.0024879	0.756218	11.0287	12.4988	15.6135	15.6215	11.0674	12.3498	15.6019	15.5375	10.5893	12.2316	14.9464	14.9043
A_55_P2035315	320292	Rasgef1b	RasGEF domain family, member 1B	0.569928	3.99963	4.5796	0.782722	3.67024	3.79075	0.442375	3.94514	5.2872	0.0792026	0.00380528	0.000165539	2.5572e-16	3.05682e-17	5.11228e-06	9.8109e-16	5.92048e-16	0.00159383	3.16995e-16	3.1903e-18	0.506068	0.97433	7.84013	8.41005	11.8398	12.4197	7.84393	8.28631	11.7891	13.1311	7.91933	8.70205	11.5896	11.7101
A_51_P461665	17329	Cxcl9	chemokine (C-X-C motif) ligand 9	0.432382	4.37978	4.55366	1.17427	5.17966	5.54197	0.561663	4.89733	5.20495	0.826593	0.065766	0.000541912	5.8051e-18	3.14514e-18	3.18303e-09	4.13056e-19	1.42137e-19	4.06068e-05	9.99584e-19	3.82507e-19	3.93827e-07	0.520873	8.83042	9.2628	13.2102	13.3841	8.89618	9.45784	13.7935	14.1011	9.65701	10.8313	14.8367	15.199
A_51_P187750	214854	Neurl3	neuralized homolog 3 homolog (Drosophila)	0.675873	3.69099	4.53544	0.333167	2.54405	3.48777	0.600757	3.69624	4.94069	0.162236	0.223146	2.54425e-06	3.65675e-17	1.43004e-18	0.00292953	1.22866e-14	8.8951e-17	1.04041e-05	3.57601e-17	3.70977e-19	0.106827	0.0319671	6.79115	7.46702	10.4821	11.3266	7.01429	7.61505	10.7105	11.955	6.95338	7.28655	9.49743	10.4412
A_55_P2122709	71704	Arhgef3	Rho guanine nucleotide exchange factor (GEF) 3	0.520928	3.8309	4.47535	0.176828	2.91774	3.40582	0.446238	4.26031	4.82029	-0.0282901	0.136282	1.12358e-05	2.40062e-18	2.06869e-19	0.0487438	1.73244e-16	1.52801e-17	6.23203e-05	4.49866e-19	6.40716e-20	0.737192	0.119592	7.82817	8.3491	11.6591	12.3035	7.96445	8.41069	12.2248	12.7847	7.79988	7.97671	10.7176	11.2057
A_51_P485756	67405	Nts	neurotensin	0.246594	3.35754	4.43488	0.320335	3.96294	4.9055	0.166817	3.23558	4.67239	-1.00657	-0.0462293	0.0115755	3.72197e-17	4.65898e-19	0.00194012	2.74411e-18	9.48683e-20	0.0716509	6.65352e-17	2.04573e-19	3.49289e-09	0.600116	8.56073	8.80733	11.9183	12.9956	8.5145	8.68132	11.7501	13.1869	7.55416	7.8745	11.5171	12.4597
A_52_P382149	13082	Cyp26a1	cytochrome P450, family 26, subfamily a, polypeptide 1	0.204054	3.09397	4.40717	0.129188	2.49756	3.5274	0.161697	3.0911	4.13871	-0.0638435	0.110158	0.0149565	1.38447e-17	5.24255e-20	0.10348	3.98496e-16	1.75826e-18	0.0462262	1.40482e-17	1.41409e-19	0.405949	0.160291	6.33818	6.54223	9.43215	10.7453	6.44834	6.61003	9.53944	10.5871	6.27434	6.40352	8.7719	9.80174
A_55_P2057936	631323	Gm12250	predicted gene 12250	1.19449	4.90653	4.37385	1.47737	5.4688	5.3166	1.09982	5.14064	4.32662	-0.202252	0.134082	5.60162e-10	1.91143e-19	1.17082e-18	2.39539e-11	3.44685e-20	5.38321e-20	1.85726e-09	9.15865e-20	1.3893e-18	0.0399095	0.15745	7.76358	8.95807	12.6701	12.1374	7.89766	8.99748	13.0383	12.2243	7.56133	9.0387	13.0301	12.8779
A_51_P483324	19260	Ptpn22	protein tyrosine phosphatase, non-receptor type 22 (lymphoid)	0.904244	3.82169	4.35188	0.618327	3.1498	3.65034	0.951847	4.05601	4.59315	0.402046	-0.202722	7.03283e-07	4.08391e-16	5.32915e-17	6.1325e-05	8.34493e-15	8.36879e-16	3.62108e-07	1.6081e-16	2.2835e-17	0.00294636	0.0961362	7.48388	8.38812	11.3056	11.8358	7.28115	8.233	11.3372	11.8743	7.88592	8.50425	11.0357	11.5363
A_55_P2038262	236451	Phf11b	PHD finger protein 11B	0.78262	4.22306	4.31656	1.16506	5.24663	5.52991	0.690102	4.25901	4.48695	-0.519458	-0.115728	1.56835e-05	4.89593e-16	3.47538e-16	1.08852e-07	1.62715e-17	7.11611e-18	6.23927e-05	4.28777e-16	1.89524e-16	0.000935209	0.379882	10.8201	11.6027	15.0432	15.1367	10.7044	11.3945	14.9634	15.1914	10.3007	11.4657	15.5473	15.8306
A_51_P248666	60533	Cd274	CD274 antigen	2.56873	5.64168	4.29288	2.35926	5.07589	3.96458	2.63701	6.0778	4.30344	0.0696531	-0.180125	1.93897e-15	8.17523e-21	6.11018e-19	7.29848e-15	4.34216e-20	2.14088e-18	1.28745e-15	2.51891e-21	5.87784e-19	0.425231	0.0504709	9.49953	12.0683	15.1412	13.7924	9.3194	11.9564	15.3972	13.6228	9.56918	11.9284	14.6451	13.5338
A_51_P111164	223881	Rnd1	Rho family GTPase 1	0.990143	3.34927	4.27292	0.200732	1.93073	2.72111	0.751835	2.81758	3.39084	0.953785	0.864384	7.05424e-08	8.73762e-16	1.91952e-17	0.0752552	4.32692e-12	2.21973e-14	2.50911e-06	1.29248e-14	7.20528e-16	1.16903e-07	4.29317e-07	13.594	14.5842	16.9433	17.8669	14.4584	15.2102	17.276	17.8492	14.5478	14.7485	16.4785	17.2689
A_55_P2086811	434484	Sp140	Sp140 nuclear body protein	0.665345	3.78538	4.26864	0.801569	4.34638	4.58008	0.499517	3.90945	4.30677	-0.883399	-0.0604869	1.47195e-07	5.84379e-19	8.77709e-20	1.14427e-08	6.60087e-20	2.88634e-20	5.57682e-06	3.51394e-19	7.62738e-20	2.88084e-09	0.430872	10.0715	10.7368	13.8569	14.3401	10.011	10.5105	13.9205	14.3178	9.1881	9.98967	13.5345	13.7682
A_55_P2137049	433470	AA467197	expressed sequence AA467197	0.898972	4.01512	4.23877	0.846206	3.76549	4.10927	0.81186	4.51552	4.99198	0.654482	-0.0898463	4.46386e-07	9.89818e-17	4.22767e-17	9.70537e-07	2.70696e-16	6.88061e-17	1.63496e-06	1.56502e-17	3.2289e-18	2.11033e-05	0.426116	10.0469	10.9459	14.062	14.2857	9.95705	10.7689	14.4726	14.949	10.7014	11.5476	14.4669	14.8106
A_55_P2086664	232670	Tspan33	tetraspanin 33	0.0915993	2.80541	4.23634	0.220362	2.05863	3.57238	0.0314148	2.28605	4.02411	0.0814636	-0.090493	0.37183	5.75596e-15	9.06007e-18	0.0420779	6.88429e-13	1.31792e-16	0.756719	1.37464e-13	2.03282e-17	0.425829	0.377488	7.6093	7.7009	10.4147	11.8456	7.5188	7.55022	9.80485	11.5429	7.69076	7.91112	9.74939	11.2631
A_55_P2036693	21939	Cd40	CD40 antigen	0.5039	4.26925	4.20317	0.568922	3.59464	3.2781	0.57543	4.55254	4.73251	1.05092	-0.103478	3.06516e-06	4.59289e-20	5.87587e-20	6.70161e-07	6.93214e-19	2.96267e-18	5.78959e-07	1.66449e-20	9.01947e-21	1.25881e-10	0.169177	8.11397	8.61787	12.3832	12.3171	8.01049	8.58592	12.563	12.743	9.16489	9.73381	12.7595	12.443
A_55_P2125208	214855	Arid5a	AT rich interactive domain 5A (MRF1-like)	1.01258	3.94801	4.19561	0.728676	2.94801	3.02591	0.878371	3.84754	4.23712	0.387252	-0.0799747	1.56875e-09	1.32996e-18	5.0979e-19	1.53843e-07	1.31277e-16	8.72061e-17	1.18905e-08	1.99632e-18	4.3647e-19	0.000241573	0.345344	11.1831	12.1957	15.1311	15.3787	11.1031	11.9815	14.9507	15.3402	11.5703	12.299	14.5184	14.5963
A_55_P2041961	12156	Bmp2	bone morphogenetic protein 2	-0.0917682	3.19137	4.19224	0.146029	3.78543	4.2733	0.0401222	3.89925	4.87982	-0.145939	-0.292072	0.144654	2.51824e-19	3.3858e-21	0.0267344	1.69988e-20	2.50109e-21	0.511983	1.06435e-20	3.06377e-22	0.0268141	0.00016982	8.05932	7.96756	11.2507	12.2516	7.76725	7.80737	11.6665	12.6471	7.91339	8.05941	11.6988	12.1867
A_51_P199135	12522	Cd83	CD83 antigen	0.0593138	1.90469	4.19014	-0.0927572	0.845892	2.83075	0.644904	1.57974	3.66269	0.768179	0.103146	0.824943	2.14528e-06	3.68562e-11	0.729707	0.00554456	1.11337e-08	0.0265455	1.96042e-05	2.7189e-10	0.0102453	0.70095	6.43785	6.49716	8.34253	10.628	6.54099	7.1859	8.12073	10.2037	7.20602	7.11327	8.05192	10.0368
A_66_P105032	620695	Gm13889	predicted gene 13889	-0.212706	1.65142	4.16582	-0.152473	1.12994	3.49143	-0.183138	1.72975	4.87792	0.237813	0.0880515	0.0118728	2.50966e-13	1.29942e-19	0.0587428	7.92345e-11	2.10484e-18	0.0264881	1.22883e-13	1.07458e-20	0.00591198	0.256905	9.07431	8.8616	10.7257	13.2401	9.16236	8.97922	10.8921	14.0403	9.31212	9.15965	10.4421	12.8036
A_55_P2136880	17872	Ppp1r15a	protein phosphatase 1, regulatory (inhibitor) subunit 15A	0.825411	3.9009	4.14909	0.479724	3.393	3.50001	0.963828	4.24226	4.3341	-0.0419552	-0.125697	4.55214e-10	1.66849e-20	6.29389e-21	8.24574e-07	1.51028e-19	9.25095e-20	4.58553e-11	4.43049e-21	3.15763e-21	0.505378	0.0581678	13.2824	14.1078	17.1833	17.4315	13.1567	14.1205	17.3989	17.4908	13.2404	13.7201	16.6334	16.7404
A_55_P1969477	18671	Abcb1a	ATP-binding cassette, sub-family B (MDR/TAP), member 1A	0.59927	2.76314	4.14474	0.362763	1.72254	2.29571	0.506353	2.94218	4.24816	1.67007	0.040722	5.66645e-07	8.02077e-17	1.3551e-19	0.000179047	1.26272e-13	1.45927e-15	4.63058e-06	2.99336e-17	9.18367e-20	2.03426e-13	0.593174	7.89917	8.49844	10.6623	12.0439	7.93989	8.44625	10.8821	12.1881	9.56924	9.932	11.2918	11.8649
A_66_P124858	68203	Diras2	DIRAS family, GTP-binding RAS-like 2	-0.0548901	3.2875	4.12765	-0.00946483	2.68411	2.54363	-0.216314	3.38264	4.30465	0.318124	-0.172974	0.574087	2.54186e-16	7.13366e-18	0.922411	6.03214e-15	1.39154e-14	0.0381309	1.62565e-16	3.68379e-18	0.00431985	0.0895235	9.83965	9.78476	13.1272	13.9673	9.66668	9.45036	13.0493	13.9713	10.1578	10.1483	12.8419	12.7014
A_55_P2052385	100702	Gbp6	guanylate binding protein 6	0.882149	3.98633	4.09457	1.31979	4.60147	4.4881	0.977038	4.21067	4.12719	-0.742848	0.209827	1.43159e-08	1.50582e-18	9.87205e-19	4.10864e-11	1.56642e-19	2.32206e-19	3.37337e-09	6.35304e-19	8.71145e-19	1.50348e-07	0.0234302	9.83655	10.7187	13.8229	13.9311	10.0464	11.0234	14.257	14.1736	9.09371	10.4135	13.6952	13.5818
A_66_P139683	58203	Zbp1	Z-DNA binding protein 1	0.642005	3.71449	4.06812	0.993139	3.95613	4.43761	0.815705	3.87055	3.98194	-0.355303	-0.0365881	3.49608e-07	1.25833e-18	2.99949e-19	8.158e-10	4.65876e-19	7.60576e-20	1.35902e-08	6.57713e-19	4.20466e-19	0.00029676	0.641535	10.3422	10.9842	14.0567	14.4103	10.3056	11.1213	14.1762	14.2876	9.98693	10.9801	13.9431	14.4245
A_51_P235123	18037	Nfkbie	nuclear factor of kappa light polypeptide gene enhancer in B cells inhibitor, epsilon	0.275921	2.96637	4.06263	0.319209	1.94788	3.09881	0.357186	3.05336	4.37656	0.34503	0.0858122	0.0167295	4.1479e-15	3.02171e-17	0.00703307	2.72412e-12	2.09934e-15	0.00325049	2.64347e-15	9.37777e-18	0.00416389	0.417986	10.06	10.336	13.0264	14.1227	10.1458	10.503	13.1992	14.5224	10.4051	10.7243	12.3529	13.5039
A_55_P2290388	225998	Rorb	RAR-related orphan receptor beta	0.193032	3.33449	4.02603	0.0431877	3.35078	3.76983	0.107274	3.36601	4.03375	0.0662832	-0.0390236	0.0832363	8.03679e-16	4.19353e-17	0.684701	7.44729e-16	1.17671e-16	0.319665	6.93738e-16	4.06927e-17	0.534616	0.713556	6.81361	7.00664	10.1481	10.8396	6.77458	6.88186	10.1406	10.8083	6.87989	6.92308	10.2307	10.6497
A_66_P111011	14462	Gata3	GATA binding protein 3	0.328588	3.57094	3.98397	0.283616	2.99838	3.54279	0.327495	3.73592	3.87857	0.0449628	0.0920683	0.000148302	2.21096e-19	3.92782e-20	0.00059326	3.47485e-18	2.50508e-19	0.000153303	1.08391e-19	5.99863e-20	0.507905	0.184593	7.77881	8.1074	11.3497	11.7628	7.87088	8.19837	11.6068	11.7494	7.82377	8.10739	10.8222	11.3666
A_55_P2000062	16362	Irf1	interferon regulatory factor 1	1.65622	3.87577	3.96929	1.42673	3.39138	3.40051	1.54635	3.72995	3.86815	0.0598771	0.25574	2.97041e-11	5.9298e-17	4.07821e-17	2.72764e-10	4.80524e-16	4.60735e-16	8.28304e-11	1.08226e-16	6.11572e-17	0.568307	0.0243315	13.0501	14.7063	16.9258	17.0194	13.3058	14.8522	17.0358	17.174	13.11	14.5367	16.5013	16.5105
A_52_P15461	16168	Il15	interleukin 15	0.687345	4.10893	3.96387	0.604307	4.15948	3.64341	0.588204	4.19892	4.19163	-0.297791	0.17344	0.000456201	1.65234e-14	2.88573e-14	0.00138157	1.36658e-14	1.06322e-13	0.00171556	1.18024e-14	1.21254e-14	0.0749079	0.283452	7.89774	8.58508	12.0067	11.8616	8.07118	8.65938	12.2701	12.2628	7.59995	8.20425	11.7594	11.2434
A_55_P2016462	15945	Cxcl10	chemokine (C-X-C motif) ligand 10	2.44678	3.93442	3.93351	2.5675	3.60605	3.63363	2.36437	4.1717	4.27138	0.21269	0.0945178	1.14465e-14	6.75729e-18	6.78189e-18	5.41183e-15	2.66014e-17	2.36001e-17	1.94869e-14	2.68788e-18	1.853e-18	0.0326329	0.313786	13.9217	16.3685	17.8561	17.8552	14.0162	16.3806	18.1879	18.2876	14.1344	16.7019	17.7404	17.768
A_51_P417074	73167	Arhgap8	Rho GTPase activating protein 8	0.270475	3.74619	3.86638	0.538511	4.36906	4.24746	0.563244	3.24823	3.99304	0.217787	-0.202407	0.248272	1.90309e-11	1.18244e-11	0.0298279	1.85008e-12	2.84425e-12	0.023971	1.59962e-10	7.26385e-12	0.348958	0.383139	8.00225	8.27272	11.7484	11.8686	7.79984	8.36309	11.0481	11.7929	8.22003	8.75855	12.5891	12.4675
A_55_P2073024	225594	Gm4841	predicted gene 4841	2.26051	5.10303	3.83365	2.4906	5.66484	5.01478	1.98898	4.99611	3.9834	-0.663101	-0.0619641	1.17602e-12	3.65984e-18	3.26741e-16	2.65931e-13	7.05963e-19	4.81658e-18	8.23608e-12	5.10771e-18	1.79282e-16	2.54778e-05	0.592176	8.69285	10.9534	13.7959	12.5265	8.63089	10.6199	13.627	12.6143	8.02975	10.5203	13.6946	13.0445
A_65_P07361	74735	Trim14	tripartite motif-containing 14	1.35041	4.30245	3.83061	1.17556	4.59693	4.02258	1.17419	4.46697	3.76932	-0.091541	0.0108643	2.39549e-07	9.22479e-15	5.59032e-14	1.42844e-06	3.29096e-15	2.62141e-14	1.4494e-06	5.14465e-15	7.17394e-14	0.5694	0.945887	7.80184	9.15226	12.1043	11.6325	7.81271	8.9869	12.2797	11.582	7.7103	8.88586	12.3072	11.7329
A_55_P2116059	11630	Aim1	absent in melanoma 1	0.41889	3.97317	3.82978	0.534223	4.41685	3.58316	0.317954	4.11131	3.76609	-0.440201	-0.08103	0.00233607	2.60225e-16	4.6264e-16	0.000293248	4.94749e-17	1.30959e-15	0.0144219	1.52329e-16	6.01408e-16	0.00158623	0.494101	8.34321	8.7621	12.3164	12.173	8.26218	8.58014	12.3735	12.0283	7.90301	8.43724	12.3199	11.4862
A_52_P64514	67138	Herc6	hect domain and RLD 6	0.999514	3.83626	3.82031	1.14589	3.98051	3.47744	0.874248	3.82977	3.61222	-0.0988567	0.0209118	9.566e-11	8.40851e-20	8.97992e-20	1.23472e-11	4.69419e-20	3.96055e-19	6.87379e-10	8.63627e-20	2.17379e-19	0.160065	0.759258	9.64149	10.641	13.4777	13.4618	9.6624	10.5366	13.4922	13.2746	9.54263	10.6885	13.5231	13.0201
A_55_P2155504	16818	Lck	lymphocyte protein tyrosine kinase	0.451206	3.0563	3.79008	0.482738	2.53367	2.94421	0.329051	2.7735	3.58992	-0.118389	-0.0165631	7.36855e-05	1.27875e-16	4.34896e-18	3.5824e-05	2.40239e-15	2.29659e-16	0.00138687	5.84963e-16	1.02135e-17	0.183399	0.84816	8.71556	9.16677	11.7719	12.5056	8.699	9.02805	11.4725	12.2889	8.59717	9.07991	11.1308	11.5414
A_51_P323180	236573	Gbp9	guanylate-binding protein 9	0.644797	3.50306	3.76602	0.59434	3.80808	3.71834	0.345133	3.72235	3.88712	-0.0417436	0.435522	2.7249e-05	9.50245e-16	3.06276e-16	6.56821e-05	2.57386e-16	3.73893e-16	0.0067549	3.67633e-16	1.86559e-16	0.711548	0.00121909	7.96379	8.60859	11.4668	11.7298	8.39931	8.74444	12.1217	12.2864	7.92204	8.51638	11.7301	11.6404
A_51_P343833	22029	Traf1	TNF receptor-associated factor 1	0.27054	2.05776	3.73725	0.365358	1.31567	2.82192	0.0684902	1.94778	4.17252	0.943745	0.179832	0.0209387	1.66441e-12	1.59533e-16	0.00324888	1.31537e-09	1.28089e-14	0.525673	3.84186e-12	2.83148e-17	1.36466e-07	0.107917	7.65805	7.92859	9.71581	11.3953	7.83788	7.90637	9.78566	12.0104	8.60179	8.96715	9.91746	11.4237
A_55_P2005783	71586	Ifih1	interferon induced with helicase C domain 1	0.963482	3.51328	3.7075	1.05165	3.66956	3.38751	0.88901	3.42652	3.91669	-0.388622	-0.0807668	2.3124e-06	1.78341e-14	7.72884e-15	7.69858e-07	9.06988e-15	3.13909e-14	6.12406e-06	2.62856e-14	3.28798e-15	0.0106196	0.555883	13.0507	14.0142	16.564	16.7582	12.9699	13.859	16.3965	16.8866	12.6621	13.7137	16.3317	16.0496
A_52_P99888	66102	Cxcl16	chemokine (C-X-C motif) ligand 16	0.15478	2.64067	3.70544	0.3922	1.56599	2.50316	0.282075	2.80862	4.10822	0.538413	0.159876	0.0904023	1.44123e-15	7.10709e-18	0.000322068	4.57711e-12	3.31947e-15	0.00469909	5.49835e-16	1.39963e-18	1.15827e-05	0.0811655	9.29561	9.45039	11.9363	13.001	9.45549	9.73756	12.2641	13.5637	9.83402	10.2262	11.4	12.3372
A_51_P346668	27056	Irf5	interferon regulatory factor 5	1.07282	3.82323	3.7009	1.25898	3.80857	3.34745	1.08159	4.0273	3.60361	-0.112991	-0.155108	3.20836e-10	9.85853e-19	1.64581e-18	2.97815e-11	1.04738e-18	7.9933e-18	2.84607e-10	4.3423e-19	2.50399e-18	0.167592	0.0646835	10.5539	11.6267	14.3771	14.2548	10.3988	11.4804	14.4261	14.0024	10.4409	11.6999	14.2495	13.7884
A_55_P2103837	17472	Gbp4	guanylate binding protein 4	0.716706	3.99606	3.69222	0.777842	4.45069	4.1491	0.420348	4.12262	3.50818	0.222296	0.251451	2.15789e-07	1.26462e-18	4.39447e-18	7.2024e-08	2.31217e-19	6.99315e-19	0.000117469	7.73603e-19	9.82511e-18	0.0165389	0.008011	6.30042	7.01713	10.2965	9.99264	6.55187	6.97222	10.6745	10.06	6.52272	7.30056	10.9734	10.6718
A_55_P2181222	100033459	Pydc3	pyrin domain containing 3	0.669568	3.90274	3.64169	1.077	5.2734	5.2825	0.605261	4.25309	3.91413	0.299356	-0.0386216	5.21128e-06	3.32699e-17	9.86234e-17	1.02182e-08	2.90952e-19	2.83143e-19	1.69047e-05	8.61308e-18	3.17817e-17	0.00851886	0.703735	7.92422	8.59379	11.827	11.5659	7.8856	8.49086	12.1387	11.7997	8.22358	9.30058	13.497	13.5061
A_55_P1972872	667370	I830012O16Rik	RIKEN cDNA I830012O16 gene	1.77866	3.79293	3.61846	2.12907	4.62927	4.25593	1.78823	4.01089	3.57203	-0.904914	-0.0404128	3.71817e-12	2.94026e-17	6.15927e-17	2.37395e-13	1.27832e-18	4.80621e-18	3.42686e-12	1.22175e-17	7.54291e-17	6.86426e-08	0.67997	13.6602	15.4389	17.4532	17.2787	13.6198	15.408	17.6307	17.1918	12.7553	14.8844	17.3846	17.0112
A_51_P369803	16912	Psmb9	proteasome (prosome, macropain) subunit, beta type 9 (large multifunctional peptidase 2)	0.694148	3.41608	3.59376	0.899967	3.96314	4.31334	0.650255	3.0684	3.15265	-0.801685	0.0949099	1.27677e-05	1.55945e-15	7.0619e-16	5.31647e-07	1.52656e-16	4.04345e-17	2.66947e-05	8.30634e-15	5.44942e-15	2.29163e-06	0.407771	11.3279	12.0221	14.744	14.9217	11.4228	12.0731	14.4912	14.5755	10.5262	11.4262	14.4894	14.8396
A_55_P2007756	16666	Krt16	keratin 16	0.094978	2.44039	3.5453	-0.18517	1.66869	2.55346	0.0272414	2.38219	3.76384	-0.0791052	-0.169305	0.259061	2.04876e-15	5.86944e-18	0.0366332	7.3564e-13	1.01015e-15	0.741467	2.98531e-15	2.28865e-18	0.344225	0.0534309	7.92359	8.01857	10.364	11.4689	7.75429	7.78153	10.1365	11.5181	7.84449	7.65932	9.51318	10.3979
A_52_P463235	67434	Ankrd33b	ankyrin repeat domain 33B	0.3892	1.99302	3.53991	0.263749	1.65546	3.04976	0.252322	2.09725	3.88299	0.431668	-0.036556	0.000534594	2.37329e-13	3.0815e-17	0.00988609	4.05631e-12	3.19111e-16	0.0128488	1.08176e-13	7.19702e-18	0.000203092	0.690124	6.97953	7.36873	8.97256	10.5194	6.94298	7.1953	9.04022	10.826	7.4112	7.67495	9.06666	10.461
A_51_P452629	24088	Tlr2	toll-like receptor 2	0.890327	3.63975	3.50588	0.756224	2.98573	3.15899	0.633795	3.58334	3.50536	0.284597	0.538801	1.5253e-09	6.11257e-19	1.10353e-18	1.554e-08	1.38296e-17	5.6943e-18	1.73189e-07	7.81935e-19	1.10608e-18	0.00117854	1.41478e-06	11.1811	12.0714	14.8208	14.687	11.7199	12.3537	15.3032	15.2252	11.4657	12.2219	14.4514	14.6247
A_51_P420547	224796	Clic5	chloride intracellular channel 5	0.597163	4.0184	3.48901	0.667872	3.85253	2.92246	0.399211	4.50316	4.01839	-0.0997393	-0.0791205	0.00016695	5.0019e-16	4.53863e-15	5.28962e-05	9.66906e-16	7.09973e-14	0.0048577	8.39779e-17	5.00216e-16	0.426013	0.526174	6.46428	7.06144	10.4827	9.95329	6.38516	6.78437	10.8883	10.4035	6.36454	7.03241	10.2171	9.287
A_55_P1959064	23961	Oas1b	2'-5' oligoadenylate synthetase 1B	1.52842	3.6966	3.47391	1.57593	3.61092	3.80235	1.52181	3.55822	2.93535	-0.614738	-0.0543722	9.93571e-13	1.03854e-18	2.76411e-18	6.21711e-13	1.50287e-18	6.65767e-19	1.06168e-12	1.89467e-18	3.91e-17	4.92834e-07	0.483564	10.8417	12.3701	14.5383	14.3156	10.7873	12.3091	14.3456	13.7227	10.227	11.8029	13.8379	14.0293
A_51_P270426	13656	Egr4	early growth response 4	0.725228	3.02167	3.47263	0.158109	2.22152	2.56404	0.664553	3.54001	4.03184	-0.264405	-0.0488651	1.94756e-08	7.65214e-18	8.55717e-19	0.0391515	9.53421e-16	1.00986e-16	6.48114e-08	6.32048e-19	8.11472e-20	0.00173628	0.497235	6.96154	7.68677	9.98321	10.4342	6.91268	7.57723	10.4527	10.9445	6.69714	6.85525	8.91865	9.26118
A_51_P481930	12555	Cdh15	cadherin 15	1.19148	4.56149	3.4661	1.13307	4.46576	3.22711	1.14672	4.42847	3.38924	0.0697092	-0.260122	4.76563e-10	4.87459e-19	3.67526e-17	9.91864e-10	6.81069e-19	1.12776e-16	8.334e-10	7.77318e-19	5.2265e-17	0.445738	0.0101281	9.00115	10.1926	13.5626	12.4673	8.74103	9.88775	13.1695	12.1303	9.07086	10.2039	13.5366	12.298
A_55_P2112762	104943	Fam110c	family with sequence similarity 110, member C	0.528297	2.94155	3.4561	0.178344	2.16547	2.65006	0.413422	3.07065	3.63204	-0.18934	-0.0369567	1.57433e-07	8.88863e-19	6.98635e-20	0.00878809	1.09876e-16	4.59997e-18	3.598e-06	4.51559e-19	3.18909e-20	0.00598554	0.544799	8.7863	9.31459	11.7278	12.2424	8.74934	9.16276	11.82	12.3814	8.59696	8.7753	10.7624	11.247
A_51_P108020	574428	Zmynd15	zinc finger, MYND-type containing 15	0.45111	2.49205	3.44874	0.372072	1.82401	2.44556	0.355019	2.59052	3.68364	0.449926	0.0360635	0.000424257	4.96473e-14	3.14854e-16	0.00214965	5.93949e-12	6.64353e-14	0.00305896	2.72389e-14	1.12121e-16	0.00043457	0.727597	8.00729	8.4584	10.4993	11.456	8.04336	8.39838	10.6339	11.727	8.45722	8.82929	10.2812	10.9028
A_55_P2042813	634650	Gbp11	guanylate binding protein 11	0.497123	4.11034	3.44197	0.474019	4.11844	3.89322	0.569719	4.70892	4.06651	0.0571188	-0.0444527	0.000134791	1.41051e-17	2.28595e-16	0.00021546	1.36752e-17	3.30965e-17	3.21963e-05	1.65973e-18	1.6695e-17	0.573837	0.660968	6.46898	6.9661	10.5793	9.91095	6.42453	6.99425	11.1334	10.491	6.5261	7.00012	10.6445	10.4193
A_55_P1961968	22634	Plagl1	pleiomorphic adenoma gene-like 1	0.161123	1.9594	3.43542	-0.0825313	1.19528	2.21063	-0.080573	2.27819	3.24194	0.840459	0.333178	0.133945	2.08858e-12	3.49757e-16	0.430439	3.20455e-09	3.29381e-13	0.441246	2.07275e-13	8.66074e-16	4.01934e-07	0.00489818	12.131	12.2921	14.0904	15.5664	12.4641	12.3836	14.7423	15.7061	12.9714	12.8889	14.1667	15.1821
A_52_P615247	621875	A530040E14Rik	RIKEN cDNA A530040E14 gene	-0.0772074	3.17791	3.43279	0.204437	2.95423	2.83678	0.280672	3.7547	4.099	-0.0494578	-0.55205	0.786334	5.0611e-09	1.67582e-09	0.476012	1.41709e-08	2.4929e-08	0.331259	4.55177e-10	1.24898e-10	0.862049	0.0663884	7.1531	7.0759	10.331	10.5859	6.60105	6.88172	10.3557	10.7001	7.10364	7.30808	10.0579	9.94043
A_52_P536494	18109	Mycn	v-myc myelocytomatosis viral related oncogene, neuroblastoma derived (avian)	0.113464	3.35512	3.42054	-0.105702	3.42036	3.32147	0.158485	3.53587	3.01784	0.214197	-0.168005	0.259423	2.30646e-16	1.70427e-16	0.292156	1.70567e-16	2.70089e-16	0.122004	1.01329e-16	1.20977e-15	0.0423206	0.102696	6.48092	6.59438	9.83604	9.90146	6.31291	6.4714	9.84879	9.33075	6.69512	6.58941	10.1155	10.0166
A_55_P2019719	246728	Oas2	2'-5' oligoadenylate synthetase 2	0.787485	3.19245	3.38955	1.04915	3.90524	4.31245	0.638233	3.42324	3.26749	-0.731165	-0.198386	2.37453e-06	3.54883e-15	1.39381e-15	5.67145e-08	1.5201e-16	3.20567e-17	2.78023e-05	1.19437e-15	2.47051e-15	5.83347e-06	0.0902001	11.1594	11.9469	14.3519	14.549	10.9611	11.5993	14.3843	14.2285	10.4283	11.4774	14.3335	14.7407
A_51_P171075	12981	Csf2	colony stimulating factor 2 (granulocyte-macrophage)	0.946106	1.49404	3.37117	0.624786	0.854496	2.21182	0.374252	1.81684	3.38226	1.63649	1.52462	1.45231e-09	1.59575e-12	5.04945e-18	4.44491e-07	6.24274e-09	3.72985e-15	0.000165079	7.90137e-14	4.79517e-18	3.95635e-13	1.17088e-12	7.55092	8.49702	9.04495	10.9221	9.07554	9.44979	10.8924	12.4578	9.1874	9.81219	10.0419	11.3992
A_65_P17218	100040462	Mndal	myeloid nuclear differentiation antigen like	0.9611	3.20803	3.35554	1.05864	3.6727	3.58836	0.951255	3.63331	3.50909	-0.251931	-0.0977923	3.27814e-08	4.48132e-16	2.21672e-16	8.51176e-09	5.37779e-17	7.74386e-17	3.77733e-08	6.36953e-17	1.09936e-16	0.0193117	0.327417	11.741	12.7021	14.949	15.0965	11.6432	12.5945	15.2765	15.1523	11.4891	12.5477	15.1618	15.0774
A_55_P2054643	18191	Nrxn3	neurexin III	0.121578	3.36833	3.33326	0.337605	3.72054	3.37067	0.188343	3.88903	3.75979	0.0616822	-0.0803958	0.265063	7.74996e-16	9.12752e-16	0.00553208	1.63384e-16	7.66629e-16	0.0925972	8.15757e-17	1.386e-16	0.566022	0.456092	6.26153	6.3831	9.62986	9.59478	6.18113	6.36947	10.0702	9.94092	6.32321	6.66081	10.0437	9.69388
A_55_P2083988	16909	Lmo2	LIM domain only 2	0.80951	4.11553	3.32465	0.757547	4.14507	2.99609	0.667028	4.31103	3.57218	0.537653	-0.152684	4.47351e-08	8.59799e-19	2.47297e-17	1.10104e-07	7.68135e-19	1.26633e-16	5.88511e-07	4.13614e-19	7.99565e-18	8.38924e-06	0.0859094	6.65493	7.46444	10.7705	9.97958	6.50225	7.16927	10.8133	10.0744	7.19258	7.95013	11.3377	10.1887
A_55_P2019009	211329	Ncoa7	nuclear receptor coactivator 7	1.12584	3.57033	3.32293	0.827248	3.20026	2.80866	1.07926	3.99647	3.66961	0.00958413	0.0943082	1.16237e-10	2.09832e-18	6.49967e-18	1.00955e-08	1.17454e-17	9.12529e-17	2.17207e-10	3.5477e-19	1.36206e-18	0.90193	0.235873	7.70163	8.82747	11.272	11.0246	7.79594	8.8752	11.7924	11.4656	7.71121	8.53846	10.9115	10.5199
A_55_P2133195	240327	Gm4951	predicted gene 4951	1.92442	3.73819	3.30566	1.98176	4.51677	4.26158	1.57572	3.93789	2.91556	-1.00936	0.592596	2.0855e-11	7.58329e-16	5.16562e-15	1.34028e-11	3.91052e-17	9.74187e-17	4.06818e-10	3.35927e-16	3.63226e-14	2.10658e-07	0.000114131	10.6663	12.5908	14.4045	13.972	11.2589	12.8347	15.1968	14.1745	9.65698	11.6387	14.1738	13.9186
A_55_P1983708	23920	Insrr	insulin receptor-related receptor	0.169295	2.77494	3.29567	0.165048	3.48752	3.38556	-0.0504897	2.84623	3.24537	0.0246308	0.112026	0.0388491	8.30632e-17	5.56746e-18	0.0433534	2.28431e-18	3.64499e-18	0.511472	5.57855e-17	7.09214e-18	0.747457	0.155777	6.46733	6.63662	9.24226	9.763	6.57935	6.52886	9.42558	9.82472	6.49196	6.657	9.97948	9.87752
A_51_P514961	99929	Tiparp	TCDD-inducible poly(ADP-ribose) polymerase	0.665512	2.52019	3.29349	0.278227	2.49836	3.03142	0.736823	2.94101	3.15261	-0.958764	0.167576	6.02094e-08	1.24361e-16	1.8521e-18	0.00111211	1.4254e-16	6.8335e-18	1.47688e-08	1.10024e-17	3.68698e-18	3.36602e-10	0.0294917	12.0575	12.723	14.5777	15.351	12.2251	12.9619	15.1661	15.3777	11.0987	11.377	13.5971	14.1302
A_51_P500082	667373	Gm14446	predicted gene 14446	1.38026	4.87608	3.289	1.56892	6.0626	5.09049	0.935137	4.69457	3.26338	-0.0263426	0.0234141	1.42179e-09	5.64821e-18	2.70677e-15	2.18689e-10	1.82429e-19	2.86872e-18	3.12168e-07	1.02594e-17	3.05773e-15	0.815971	0.836091	7.22499	8.60524	12.1011	10.514	7.2484	8.18354	11.943	10.5118	7.19864	8.76756	13.2612	12.2891
A_51_P262515	219131	Phf11a	PHD finger protein 11A	0.699883	2.98763	3.28575	1.04792	3.65707	3.89377	0.723301	3.41326	3.69661	-0.350244	-0.0823285	4.92701e-06	4.04765e-15	9.17555e-16	2.60194e-08	1.71753e-16	6.42295e-17	3.31106e-06	5.05939e-16	1.45109e-16	0.00389584	0.439256	11.6455	12.3454	14.6331	14.9312	11.5632	12.2865	14.9764	15.2598	11.2952	12.3432	14.9523	15.189
A_52_P380369	219132	Phf11d	PHD finger protein 11D	0.771355	2.88757	3.26377	1.04626	3.40317	3.8094	0.750598	3.01438	3.15761	-0.548582	-0.0382135	4.84319e-07	1.73042e-15	2.54976e-16	7.70758e-09	1.3239e-16	2.2549e-17	6.88395e-07	8.84314e-16	4.2788e-16	2.93607e-05	0.692788	12.6846	13.4559	15.5721	15.9483	12.6463	13.3969	15.6607	15.804	12.136	13.1822	15.5391	15.9454
A_52_P77764	11988	Slc7a2	solute carrier family 7 (cationic amino acid transporter, y+ system), member 2	0.261183	2.20964	3.26139	0.25042	1.91368	3.03539	0.315698	2.93033	3.7903	0.245483	0.200107	0.0369421	1.98801e-12	4.89221e-15	0.0443359	1.75736e-11	1.49463e-14	0.014223	2.58179e-14	4.68292e-16	0.0481656	0.100292	7.92752	8.1887	10.1372	11.1889	8.12763	8.44332	11.058	11.9179	8.173	8.42342	10.0867	11.2084
A_55_P2093286	11815	Apod	apolipoprotein D	0.0725772	2.53872	3.2592	0.318694	3.83084	4.87453	0.10207	2.45898	3.3133	-0.64204	-0.0897384	0.474597	2.48428e-14	5.06624e-16	0.00544086	4.02282e-17	9.07718e-19	0.318438	4.07375e-14	3.91574e-16	7.93525e-06	0.378697	10.7719	10.8445	13.3107	14.0311	10.6822	10.7843	13.1412	13.9955	10.1299	10.4486	13.9607	15.0044
A_55_P1978465	15019	H2-Q8	histocompatibility 2, Q region locus 8	0.0889333	2.30842	3.25763	0.173033	2.41366	3.83411	0.195387	2.35532	3.68794	-0.926971	0.0228858	0.251084	1.33034e-15	5.99669e-18	0.0341637	6.62821e-16	4.60296e-19	0.0187758	9.71663e-16	8.49584e-19	1.39259e-09	0.763176	10.8719	10.9609	13.1804	14.1296	10.8948	11.0902	13.2501	14.5828	9.94497	10.118	12.3586	13.7791
A_51_P273609	228550	Itpka	inositol 1,4,5-trisphosphate 3-kinase A	0.86211	3.6069	3.2497	0.823046	3.68485	3.27762	0.729206	3.68118	3.18068	0.0127802	0.130732	1.15119e-06	8.76994e-16	4.46371e-15	2.05571e-06	6.27805e-16	3.90668e-15	8.83378e-06	6.37668e-16	6.2351e-15	0.911822	0.266786	7.10027	7.96238	10.7072	10.35	7.231	7.9602	10.9122	10.4117	7.11305	7.93609	10.7979	10.3907
A_55_P1966731	15950	Ifi203	interferon activated gene 203	1.2732	3.70585	3.24516	1.46911	4.03938	3.55885	1.30645	4.13081	3.28913	-0.183277	0.0348152	2.59979e-11	1.66791e-18	1.34781e-17	2.98698e-12	4.28709e-19	3.15536e-18	1.76467e-11	3.01185e-19	1.09072e-17	0.0326524	0.662588	11.5763	12.8495	15.2822	14.8215	11.6111	12.9176	15.7419	14.9003	11.393	12.8621	15.4324	14.9519
A_52_P604629	215418	Csrnp1	cysteine-serine-rich nuclear protein 1	0.948698	2.88854	3.23247	0.573526	2.40884	2.55135	1.04966	3.22203	3.24077	-0.123064	-0.25418	8.66952e-11	2.91962e-18	4.95871e-19	1.12881e-07	5.0764e-17	2.05801e-17	1.90919e-11	5.2184e-19	4.76216e-19	0.0695952	0.00100671	12.9015	13.8502	15.79	16.1339	12.6473	13.6969	15.8693	15.8881	12.7784	13.3519	15.1872	15.3298
A_51_P226269	66214	Rgcc	regulator of cell cycle	0.0833853	2.10932	3.22589	0.0262638	2.5431	3.23435	-0.227525	2.17715	3.51515	-0.0261639	0.0122629	0.330199	2.82058e-14	3.70537e-17	0.755826	1.53645e-15	3.55607e-17	0.0145861	1.72617e-14	9.60832e-18	0.756722	0.884417	9.80231	9.8857	11.9116	13.0282	9.81458	9.58705	11.9917	13.3297	9.77615	9.80241	12.3192	13.0105
A_52_P211956	66607	Ms4a4d	membrane-spanning 4-domains, subfamily A, member 4D	0.00665008	2.08531	3.21413	0.393482	3.11246	4.35028	0.137154	2.61897	3.38442	-0.425361	0.0402236	0.96376	1.47481e-10	2.10817e-13	0.0148827	3.45672e-13	1.92694e-15	0.355389	4.8308e-12	9.50952e-14	0.00943104	0.783705	8.08566	8.09231	10.171	11.2998	8.12589	8.26304	10.7449	11.5103	7.6603	8.05378	10.7728	12.0106
A_51_P145322	18503	Pax1	paired box 1	0.216495	2.36651	3.20784	0.277099	1.98609	2.30704	0.0664176	2.41151	3.34327	-0.575302	-0.0562567	0.0473148	9.42972e-14	8.33394e-16	0.0142567	1.39248e-12	1.39663e-13	0.518939	7.04892e-14	4.36491e-16	3.30783e-05	0.584143	9.70416	9.92065	12.0707	12.912	9.6479	9.71432	12.0594	12.9912	9.12885	9.40595	11.1149	11.4359
A_55_P2053838	21929	Tnfaip3	tumor necrosis factor, alpha-induced protein 3	1.00239	2.91735	3.20242	0.565692	2.0815	2.19012	0.921655	2.92257	2.96947	-0.0136828	0.186461	1.82277e-08	1.96809e-15	4.58516e-16	2.5652e-05	3.68236e-13	1.68329e-13	5.79999e-08	1.91396e-15	1.49282e-15	0.889312	0.0720472	12.2957	13.2981	15.213	15.4981	12.4821	13.4038	15.4047	15.4516	12.282	12.8477	14.3635	14.4721
A_55_P1961152	18991	Pou3f1	POU domain, class 3, transcription factor 1	0.297325	3.4362	3.19982	0.355503	3.41996	2.88788	0.405583	3.48092	3.30605	0.0886705	0.0738303	0.0301692	8.20361e-15	2.48171e-14	0.0117401	8.83116e-15	1.21304e-13	0.00509378	6.70891e-15	1.49498e-14	0.488012	0.562736	7.76583	8.06315	11.202	10.9656	7.83966	8.24524	11.3206	11.1457	7.8545	8.21	11.2745	10.7424
A_55_P2158227	11600	Angpt1	angiopoietin 1	0.264747	3.09658	3.19093	0.215341	3.44561	3.25885	0.034484	2.74474	2.65589	-0.14849	0.369481	0.016345	1.04185e-15	6.51709e-16	0.0443196	1.95901e-16	4.68799e-16	0.731115	6.83311e-15	1.13984e-14	0.151694	0.00178024	8.15141	8.41615	11.248	11.3423	8.52089	8.55537	11.2656	11.1768	8.00292	8.21826	11.4485	11.2618
A_55_P2113210	72318	Cyth4	cytohesin 4	0.357668	1.67894	3.17959	0.0058024	0.251168	1.22794	0.277122	1.69839	3.48173	1.38039	-0.122566	0.000640068	1.23018e-12	6.06581e-17	0.946066	0.00899941	1.3725e-10	0.00473489	1.03152e-12	1.45737e-17	2.39395e-11	0.166064	7.17956	7.53723	8.8585	10.3592	7.057	7.33412	8.75539	10.5387	8.55995	8.56575	8.81112	9.78789
A_51_P276235	241274	Pnpla7	patatin-like phospholipase domain containing 7	0.272273	2.91341	3.17932	0.579327	3.31287	3.27487	0.478766	3.17011	2.9288	-0.789793	-0.504069	0.000261252	7.05803e-19	1.77964e-19	3.24308e-08	9.29529e-20	1.11522e-19	4.18455e-07	1.86302e-19	6.49547e-19	3.90053e-10	2.12868e-07	11.3351	11.6073	14.2485	14.5144	10.831	11.3098	14.0011	13.7598	10.5453	11.1246	13.8581	13.8201
A_51_P390538	17476	Mpeg1	macrophage expressed gene 1	0.392847	3.19207	3.17071	0.218384	2.16788	2.53079	0.297734	3.06628	3.01498	1.96533	0.136492	0.00244154	3.19713e-15	3.54969e-15	0.0629479	1.26317e-12	1.1721e-13	0.0150269	5.98046e-15	7.77607e-15	5.62328e-12	0.229464	9.1273	9.52015	12.3194	12.298	9.26379	9.56153	12.3301	12.2788	11.0926	11.311	13.2605	13.6234
A_55_P2091461	12363	Casp4	caspase 4, apoptosis-related cysteine peptidase	0.735761	3.16908	3.15808	0.78624	3.27337	3.19887	0.547304	2.94406	3.05197	-0.534802	0.136007	8.52133e-08	2.46276e-17	2.60102e-17	3.44488e-08	1.48041e-17	2.126e-17	3.82277e-06	7.8283e-17	4.44912e-17	5.04868e-06	0.106416	12.3729	13.1087	15.542	15.531	12.5089	13.0562	15.453	15.5609	11.8381	12.6244	15.1115	15.037
A_55_P2036475	15964	Ifna11	interferon alpha 11	0.327228	4.21422	3.14386	0.552374	5.11271	3.66758	0.30889	4.4475	3.19512	-0.00347529	-0.0184147	0.0335619	2.17109e-15	2.04349e-13	0.00121974	1.05574e-16	1.8865e-14	0.0432872	9.36105e-16	1.59277e-13	0.980594	0.897471	6.51279	6.84002	10.727	9.65665	6.49438	6.80327	10.9419	9.68949	6.50932	7.06169	11.622	10.1769
A_55_P2076861	214968	Sema6d	sema domain, transmembrane domain (TM), and cytoplasmic domain, (semaphorin) 6D	0.391627	2.19061	3.13006	-0.0171048	1.14606	1.22388	-0.0193765	1.81263	2.42472	-0.011996	0.189888	0.172771	6.02189e-07	4.67993e-09	0.951058	0.00072278	0.000401498	0.944569	6.28924e-06	1.59117e-07	0.965664	0.498791	6.70327	7.09489	8.89388	9.83333	6.89315	6.87378	8.70579	9.31787	6.69127	6.67416	7.83733	7.91514
A_51_P253984	18546	Pcp4	Purkinje cell protein 4	0.0774457	1.99219	3.12683	-0.0529035	2.19848	3.37146	0.0626133	1.81556	3.34674	-0.132697	-0.119671	0.500505	7.02268e-12	6.8461e-15	0.644078	1.5697e-12	2.11698e-15	0.585033	2.84633e-11	2.37445e-15	0.254891	0.302666	7.06387	7.14132	9.05606	10.1907	6.9442	7.00682	8.75977	10.2909	6.93118	6.87827	9.12966	10.3026
A_51_P513568	74732	Stx11	syntaxin 11	0.470717	2.80876	3.11601	0.409007	2.41436	2.54742	0.35461	2.50139	2.53671	0.0307824	0.185483	7.26556e-05	9.11279e-16	1.79501e-16	0.000294268	9.63974e-15	4.18293e-15	0.00104945	5.5565e-15	4.46652e-15	0.733021	0.0528909	10.3445	10.8153	13.1533	13.4606	10.53	10.8846	13.0314	13.0667	10.3753	10.7843	12.7897	12.9227
A_51_P203955	14469	Gbp2	guanylate binding protein 2	0.773642	3.01682	3.11332	0.893145	3.36799	3.3007	0.799334	3.04437	2.97762	-0.212236	0.137631	2.22483e-07	3.61046e-16	2.20514e-16	3.1921e-08	6.42677e-17	8.82091e-17	1.44106e-07	3.13161e-16	4.43059e-16	0.0311536	0.144895	14.7992	15.5729	17.816	17.9125	14.9368	15.7362	17.9812	17.9145	14.587	15.4801	17.955	17.8877
A_55_P2041738	16169	Il15ra	interleukin 15 receptor, alpha chain	0.598457	3.20596	3.09417	0.501758	3.28668	2.86748	0.626229	3.88418	3.86811	-0.0305395	-0.220418	5.49465e-06	1.34095e-16	2.33873e-16	4.08986e-05	9.07944e-17	7.69275e-16	3.17945e-06	6.58046e-18	7.02384e-18	0.737533	0.025684	8.2306	8.82906	11.4366	11.3248	8.01018	8.63641	11.8944	11.8783	8.20006	8.70182	11.4867	11.0675
A_51_P327751	15957	Ifit1	interferon-induced protein with tetratricopeptide repeats 1	1.70132	3.26018	3.09252	1.83984	3.61577	3.44115	1.6249	3.55927	2.89676	-0.705174	0.385375	1.82244e-12	7.55063e-17	1.72804e-16	5.5033e-13	1.48528e-17	3.23324e-17	3.6692e-12	1.90254e-17	4.81128e-16	5.58166e-07	0.000465449	12.7751	14.4764	16.0353	15.8676	13.1605	14.7854	16.7198	16.0573	12.0699	13.9098	15.6857	15.5111
A_55_P2062246	100039796	Tgtp2	T cell specific GTPase 2	1.37594	3.42669	3.07742	1.91739	4.38099	4.25563	1.20371	3.4293	3.04395	-0.933048	-0.0620752	2.69876e-10	2.29031e-16	1.23089e-15	1.85126e-12	4.83206e-18	7.63042e-18	1.89437e-09	2.26317e-16	1.46012e-15	6.74273e-08	0.539699	14.9287	16.3046	18.3554	18.0061	14.8666	16.0703	18.2959	17.9106	13.9957	15.9131	18.3766	18.2513
A_51_P492346	68344	Tmem174	transmembrane protein 174	0.270855	2.34428	3.04186	0.286213	2.03343	2.44506	0.0150909	1.67181	2.42603	-0.270051	0.225206	0.661922	0.00141604	0.000133168	0.644162	0.00415032	0.00100036	0.980504	0.014311	0.00106811	0.662858	0.715923	8.59215	8.863	10.9364	11.634	8.81735	8.83244	10.4892	11.2434	8.3221	8.60831	10.3555	10.7672
A_51_P514712	547253	Parp14	poly (ADP-ribose) polymerase family, member 14	1.32857	3.50938	3.02809	1.54867	3.63202	3.25385	1.19476	3.63365	2.98087	-0.256005	0.0645286	3.48892e-10	1.1967e-16	1.20407e-15	3.5877e-11	6.98214e-17	3.91163e-16	1.63724e-09	6.93324e-17	1.539e-15	0.0182598	0.516765	12.3749	13.7035	15.8843	15.403	12.4394	13.6342	16.0731	15.4203	12.1189	13.6676	15.7509	15.3728
A_55_P2410304	60440	Iigp1	interferon inducible GTPase 1	1.62679	3.88721	3.01124	1.86601	4.76104	4.19092	1.71518	4.48468	3.02348	-1.22955	0.40468	2.11562e-11	2.9962e-17	1.63514e-15	2.65287e-12	1.2325e-18	9.1827e-18	9.52908e-12	3.16162e-18	1.53483e-15	1.32429e-09	0.000848996	10.5571	12.1839	14.4443	13.5683	10.9617	12.6769	15.4464	13.9852	9.32752	11.1935	14.0886	13.5184
A_51_P112355	16145	Igtp	interferon gamma induced GTPase	1.3011	3.51373	3.00942	1.67707	4.31096	3.76578	1.15249	2.99276	3.15497	-0.674724	0.113318	2.96987e-05	4.91898e-11	4.86892e-10	1.4864e-06	2.2438e-12	1.7401e-11	0.000107523	5.28084e-10	2.43303e-10	0.0086815	0.622187	13.0686	14.3697	16.5823	16.078	13.1819	14.3344	16.1747	16.3369	12.3939	14.0709	16.7048	16.1597
A_55_P2055587	224794	Enpp4	ectonucleotide pyrophosphatase/phosphodiesterase 4	0.513919	2.98091	3.00862	0.705665	3.26018	3.37628	0.53286	3.26376	3.39574	-0.336816	0.0602404	0.000118748	2.98839e-15	2.58692e-15	3.43251e-06	7.38257e-16	4.27076e-16	8.19556e-05	7.25689e-16	3.90345e-16	0.00440182	0.561358	10.2591	10.773	13.24	13.2677	10.3194	10.8522	13.5831	13.7151	9.9223	10.628	13.1825	13.2986
A_55_P2160094	18828	Plscr2	phospholipid scramblase 2	0.416208	3.00394	2.97486	0.402447	2.96974	2.7677	0.386282	3.20067	2.66825	0.0298121	-0.0292741	0.000107438	8.38532e-17	9.76781e-17	0.00015072	1.00352e-16	3.0273e-16	0.000225233	3.09763e-17	5.3677e-16	0.719107	0.723948	9.37555	9.79176	12.3795	12.3504	9.34627	9.73255	12.5469	12.0145	9.40536	9.80781	12.3751	12.1731
A_55_P2025330	21337	Tacr2	tachykinin receptor 2	0.0327971	2.32153	2.97071	0.0839052	1.81675	2.46405	0.0659709	1.97364	2.4924	-0.085427	-0.0825247	0.802832	5.74154e-12	1.31933e-13	0.52527	2.25378e-10	2.32155e-12	0.616579	6.5984e-11	1.95002e-12	0.517883	0.532021	6.68547	6.71827	9.007	9.65618	6.60295	6.66892	8.57659	9.09535	6.60004	6.68395	8.4168	9.06409
A_55_P2046802	74568	Mlkl	mixed lineage kinase domain-like	0.655358	2.90372	2.96208	0.539222	2.74093	2.80024	0.450746	3.19413	3.91992	0.18064	-0.065065	1.19574e-07	2.34461e-17	1.71493e-17	1.50536e-06	5.80248e-17	4.14616e-17	1.29704e-05	5.23628e-18	2.07726e-19	0.0243105	0.383369	10.5401	11.1954	13.4438	13.5021	10.475	10.9257	13.6691	14.3949	10.7207	11.2599	13.4616	13.5209
A_55_P1956593	69217	Plekha4	pleckstrin homology domain containing, family A (phosphoinositide binding specific) member 4	0.41613	2.86831	2.95149	0.817358	3.43244	3.33342	0.41058	3.12658	3.13248	-0.528582	-0.0814056	0.000212957	5.06877e-16	3.2405e-16	7.24129e-08	3.03617e-17	4.80828e-17	0.000242394	1.3136e-16	1.27539e-16	1.71423e-05	0.364588	12.2939	12.71	15.1622	15.2454	12.2125	12.623	15.339	15.3449	11.7653	12.5826	15.1977	15.0987
A_55_P2011678	67182	Pdzk1ip1	PDZK1 interacting protein 1	0.0810202	1.88117	2.93744	0.0522418	1.26492	2.25638	0.0795181	1.83582	2.95654	0.153774	-0.122015	0.536931	1.22761e-10	1.42571e-13	0.689472	3.65151e-08	8.03952e-12	0.544416	1.76196e-10	1.29008e-13	0.248547	0.356115	6.40625	6.48727	8.28742	9.3437	6.28424	6.36376	8.12006	9.24078	6.56003	6.61227	7.82495	8.81641
A_55_P2109857	19735	Rgs2	regulator of G-protein signaling 2	0.170653	2.29772	2.92505	-0.0246884	2.2916	2.85668	0.223468	2.46143	2.90861	-0.138365	0.206911	0.022459	2.95305e-16	6.67312e-18	0.719347	3.07897e-16	9.68131e-18	0.00445861	1.00421e-16	7.292e-18	0.0572611	0.00745069	10.1351	10.3058	12.4329	13.0602	10.3421	10.5655	12.8035	13.2507	9.99678	9.97209	12.2884	12.8535
A_55_P2019601	114564	Csprs	component of Sp100-rs	0.857766	3.01146	2.9177	0.778319	3.70217	4.51623	0.740808	3.15588	3.02554	-1.84451	-0.121662	4.24475e-08	2.72733e-16	4.47473e-16	1.58104e-07	1.06677e-17	4.66082e-19	3.03874e-07	1.30905e-16	2.53515e-16	5.5062e-13	0.186008	9.18305	10.0408	12.1945	12.1007	9.06139	9.8022	12.2173	12.0869	7.33854	8.11686	11.0407	11.8548
A_55_P1962918	381308	Mnda	myeloid cell nuclear differentiation antigen	0.987462	2.75775	2.91485	1.01312	2.77611	2.73695	0.96375	2.4991	3.11224	0.00753365	-0.113669	0.000100833	1.65083e-10	7.25317e-11	7.7378e-05	1.49647e-10	1.84639e-10	0.000129033	7.01329e-10	2.72264e-11	0.969188	0.562151	14.311	15.2984	17.0687	17.2258	14.1973	15.161	16.6964	17.3095	14.3185	15.3316	17.0946	17.0554
A_51_P325281	226691	AI607873	expressed sequence AI607873	0.949457	2.86922	2.91223	0.781759	2.89701	2.94762	0.792191	3.34538	3.57161	-0.37172	0.0366554	6.7333e-10	2.93032e-17	2.31954e-17	1.0912e-08	2.51854e-17	1.91852e-17	9.0549e-09	2.61807e-18	9.33721e-19	0.000107649	0.621223	7.13482	8.08428	10.004	10.047	7.17148	7.96367	10.5169	10.7431	6.7631	7.54486	9.66011	9.71072
A_51_P139678	20753	Sprr1a	small proline-rich protein 1A	0.258348	2.1761	2.91104	0.0227518	1.20539	2.22072	0.345672	2.29674	3.78391	-0.00356758	-0.467866	0.184724	3.35507e-09	4.72511e-11	0.904338	8.07084e-06	2.50842e-09	0.0822237	1.54484e-09	8.912e-13	0.984961	0.0232519	9.05776	9.31611	11.2339	11.9688	8.5899	8.93557	10.8866	12.3738	9.0542	9.07695	10.2596	11.2749
A_55_P2173892	57444	Isg20	interferon-stimulated protein	0.319328	2.78663	2.90341	0.638311	3.23304	3.36972	0.443988	3.16704	2.66244	-0.277418	-0.372735	0.00125137	2.78972e-16	1.46632e-16	7.79806e-07	2.71191e-17	1.41461e-17	5.57567e-05	3.74943e-17	5.69447e-16	0.00368636	0.000321149	11.6134	11.9327	14.4001	14.5168	11.2407	11.6847	14.4077	13.9031	11.336	11.9743	14.569	14.7057
A_55_P1955998	195046	Nlrp1a	NLR family, pyrin domain containing 1A	0.21302	1.84761	2.89664	0.0548411	1.0527	1.78737	0.144695	1.78044	2.49373	0.237901	0.010569	0.00590833	8.02473e-15	7.02681e-18	0.425562	4.40251e-11	1.34338e-14	0.0466266	1.42695e-14	7.39388e-17	0.00271022	0.876749	13.2702	13.4832	15.1178	16.1668	13.2808	13.4255	15.0612	15.7745	13.5081	13.5629	14.5608	15.2955
A_66_P140238	14945	Gzmk	granzyme K	-0.101017	2.10895	2.88852	0.0173381	1.70828	1.85616	0.20322	1.10361	2.68489	0.265527	0.467356	0.752388	5.31716e-06	9.59447e-08	0.956749	5.7451e-05	2.32676e-05	0.527641	0.00295258	2.54335e-07	0.411325	0.157097	7.8095	7.70849	9.91845	10.698	8.27686	8.48008	9.38047	10.9617	8.07503	8.09237	9.78331	9.93118
A_55_P1998942	246730	Oas1a	2'-5' oligoadenylate synthetase 1A	0.515303	2.55979	2.88411	0.792518	3.29739	3.71049	0.458933	2.72731	2.82903	-0.843287	-0.0764145	7.73693e-06	6.87377e-16	1.06134e-16	3.0378e-08	1.29567e-17	2.02158e-18	2.8989e-05	2.54893e-16	1.43605e-16	1.2806e-08	0.350061	12.2215	12.7368	14.7813	15.1056	12.1451	12.604	14.8724	14.9741	11.3782	12.1708	14.6756	15.0887
A_51_P200517	70727	Rasgef1a	RasGEF domain family, member 1A	-0.0320287	0.677142	2.87989	0.153524	0.269451	1.92696	0.0266807	0.765687	2.84481	-0.162719	-0.0974563	0.757108	5.8041e-06	5.30875e-15	0.151123	0.0176595	2.60475e-12	0.796591	1.28838e-06	6.42475e-15	0.129615	0.352685	6.9927	6.96067	7.66984	9.8726	6.89525	6.92193	7.66093	9.74005	6.82998	6.98351	7.09943	8.75694
A_66_P108059	72747	Ttc39c	tetratricopeptide repeat domain 39C	0.497984	2.29143	2.8729	0.327898	2.0169	2.3074	0.542632	2.59292	2.86725	0.356856	0.0544424	2.68108e-06	5.7302e-16	1.6513e-17	0.000262078	4.20107e-15	5.14034e-16	9.17149e-07	8.26389e-17	1.70315e-17	0.000113943	0.449555	11.0694	11.5674	13.3609	13.9423	11.1239	11.6665	13.7168	13.9911	11.4263	11.7542	13.4432	13.7337
A_55_P1981994	16667	Krt17	keratin 17	0.110549	1.88541	2.87162	0.0390403	1.22509	1.94292	0.0221139	1.29367	2.26351	-0.193109	-0.00330031	0.238813	5.84981e-13	8.60309e-16	0.671368	3.839e-10	3.68858e-13	0.809711	1.72106e-10	3.49408e-14	0.048423	0.971306	6.73092	6.84147	8.61633	9.60254	6.72762	6.74974	8.02129	8.99113	6.53781	6.57685	7.76291	8.48073
A_51_P272876	212943	Fam46a	family with sequence similarity 46, member A	1.02817	3.28912	2.86469	1.00329	3.10928	2.50032	1.03311	3.79363	2.79237	0.120833	-0.00318207	2.95263e-11	4.30022e-19	3.79362e-18	4.26119e-11	1.04357e-18	3.22266e-17	2.7475e-11	4.52165e-20	5.67334e-18	0.0764893	0.960825	11.8166	12.8448	15.1058	14.6813	11.8135	12.8466	15.6071	14.6058	11.9375	12.9408	15.0467	14.4378
A_51_P296608	13197	Gadd45a	growth arrest and DNA-damage-inducible 45 alpha	0.798798	1.73651	2.86062	-0.0625703	0.566566	1.97456	0.500968	2.14497	3.15195	0.771684	0.488019	1.52364e-05	5.04877e-10	2.74189e-13	0.637983	0.000512366	7.57454e-11	0.00146371	2.19507e-11	6.1429e-14	2.25024e-05	0.0018032	10.3681	11.1669	12.1047	13.2288	10.8562	11.3571	13.0011	14.0081	11.1398	11.0773	11.7064	13.1144
A_55_P1998416	15953	Ifi47	interferon gamma inducible protein 47	1.11665	3.59597	2.85616	1.29705	3.92654	3.39869	0.968286	3.62205	2.99567	-0.435078	0.0278316	1.98335e-09	3.48092e-17	1.28451e-15	2.2336e-10	8.73597e-18	8.43999e-17	1.50102e-08	3.10732e-17	6.09603e-16	0.000236165	0.766592	12.1412	13.2578	15.7371	14.9973	12.169	13.1373	15.791	15.1647	11.7061	13.0031	15.6326	15.1048
A_51_P516728	15114	Hap1	huntingtin-associated protein 1	0.987844	3.33677	2.85557	1.00979	3.99168	3.43669	0.569811	3.0079	2.81108	0.10532	0.247597	5.76399e-09	5.30734e-17	6.09109e-16	4.2172e-09	3.17034e-18	3.33935e-17	7.83482e-06	2.70065e-16	7.78662e-16	0.248181	0.012441	9.82318	10.811	13.1599	12.6788	10.0708	10.6406	13.0787	12.8818	9.9285	10.9383	13.9202	13.3652
A_52_P512575	74318	Hopx	HOP homeobox	0.147109	2.63042	2.85413	0.18979	3.17837	3.13841	0.277373	3.10483	3.16819	-0.208305	-0.00223548	0.0822008	4.42074e-16	1.23084e-16	0.0293931	2.27325e-17	2.77321e-17	0.003006	3.28367e-17	2.3908e-17	0.0183888	0.977857	7.58669	7.7338	10.2171	10.4408	7.58445	7.86182	10.6893	10.7526	7.37838	7.56817	10.5567	10.5168
A_51_P224311	64082	Popdc2	popeye domain containing 2	-0.0367802	1.4874	2.85373	-0.022196	0.91613	1.42656	-0.0888288	1.49738	2.62896	0.672102	-0.14143	0.632827	1.42082e-12	5.73428e-17	0.77259	1.94203e-09	2.68594e-12	0.256755	1.28283e-12	2.07601e-16	1.44909e-07	0.079595	7.86918	7.8324	9.35658	10.7229	7.72775	7.63892	9.22513	10.3567	8.54128	8.51909	9.45741	9.96784
A_51_P171107	67564	Tmem35	transmembrane protein 35	0.0141835	1.6676	2.84948	-0.100303	1.09071	2.20492	-0.00904138	1.31501	2.24042	-0.485848	0.098062	0.911607	5.34307e-10	1.65681e-13	0.436838	2.04525e-07	8.33853e-12	0.943578	1.6008e-08	6.54749e-12	0.00139467	0.446959	9.30873	9.32292	10.9763	12.1582	9.40679	9.39775	10.7218	11.6472	8.82288	8.72258	9.9136	11.0278
A_55_P2073099	22040	Trex1	three prime repair exonuclease 1	1.00108	2.5803	2.84573	1.00692	2.44285	2.77193	0.904765	2.56558	2.90002	-0.262022	-0.0174362	5.17911e-09	3.2455e-15	7.0369e-16	4.76817e-09	7.61175e-15	1.06105e-15	2.14695e-08	3.54809e-15	5.23628e-16	0.00917954	0.846072	13.5945	14.5956	16.1748	16.4403	13.5771	14.4819	16.1427	16.4771	13.3325	14.3394	15.7754	16.1044
A_55_P2025248	17119	Mxd1	MAX dimerization protein 1	0.681545	3.45538	2.8436	0.563947	3.27065	2.81399	0.589482	3.8035	3.44072	-0.0564259	0.0876643	1.64874e-07	4.10837e-18	8.78488e-17	1.89284e-06	9.75368e-18	1.03525e-16	1.08661e-06	9.05603e-19	4.39264e-18	0.476106	0.273662	10.0942	10.7757	13.5496	12.9378	10.1818	10.7713	13.9853	13.6226	10.0377	10.6017	13.3084	12.8517
A_55_P1960238	227659	Slc2a6	solute carrier family 2 (facilitated glucose transporter), member 6	0.0937775	2.16926	2.83403	0.369068	1.9422	2.55526	0.161604	2.48527	3.25152	-0.402316	-0.161248	0.246757	6.90871e-15	1.05979e-16	0.000230264	3.8448e-14	5.36538e-16	0.0548835	8.28368e-16	1.22436e-17	9.76482e-05	0.0553615	11.2511	11.3448	13.4203	14.0851	11.0898	11.2514	13.5751	14.3413	10.8487	11.2178	12.791	13.404
A_55_P2079535	100038621	Gm10839	predicted gene 10839	0.362923	2.7796	2.81792	0.651223	3.64909	3.52334	0.647725	3.26551	3.00686	0.0261165	0.485841	0.110619	7.62844e-10	6.24766e-10	0.00799039	1.34259e-11	2.27629e-11	0.0082659	7.09764e-11	2.41137e-10	0.904742	0.0380941	6.6962	7.05912	9.47579	9.51412	7.18204	7.82976	10.4475	10.1889	6.72231	7.37354	10.3714	10.2456
A_52_P500979	18548	Pcsk1	proprotein convertase subtilisin/kexin type 1	0.0501567	2.0953	2.81682	0.0865905	1.46267	1.84411	0.0751257	2.26851	2.2004	-0.0431724	-0.147471	0.478499	1.80427e-15	1.74861e-17	0.228319	4.72759e-13	1.31803e-14	0.293191	5.21553e-16	8.40062e-16	0.540996	0.0487926	6.25074	6.3009	8.34604	9.06756	6.10327	6.17839	8.37177	8.30367	6.20757	6.29416	7.67024	8.05168
A_55_P2163353	20675	Sox3	SRY (sex determining region Y)-box 3	-0.027207	1.14492	2.81315	-0.00189056	0.982531	1.75789	0.00579975	1.26287	2.1312	-0.0348564	-0.0475658	0.682668	8.41371e-12	7.39069e-18	0.977275	8.35469e-11	1.16068e-14	0.930373	1.89737e-12	5.76204e-16	0.601067	0.477188	6.04387	6.01667	7.18879	8.85702	5.99631	6.00211	7.25917	8.12751	6.00902	6.00713	6.99155	7.76691
A_55_P1953753	12801	Cnr1	cannabinoid receptor 1 (brain)	0.0103594	1.21855	2.81236	0.0291674	0.596493	1.84973	0.207922	1.31644	2.56922	0.494449	-0.143047	0.90652	2.32429e-10	6.43075e-16	0.741311	3.94531e-06	4.28017e-13	0.0293362	7.39526e-11	2.63959e-15	3.42929e-05	0.119096	7.2734	7.28376	8.49196	10.0858	7.13036	7.33828	8.4468	9.69958	7.76785	7.79702	8.36435	9.61758
A_51_P100852	215900	Fam26f	family with sequence similarity 26, member F	0.3421	3.81342	2.80253	0.575107	4.55486	3.78806	0.344851	4.84799	3.76089	-0.0560053	-0.0443114	0.000130321	1.20767e-19	1.54744e-17	2.97732e-07	7.29505e-21	1.3418e-19	0.000120212	2.72123e-21	1.50327e-19	0.423819	0.525267	6.6004	6.9425	10.4138	9.40293	6.55609	6.90094	11.4041	10.317	6.54439	7.1195	11.0993	10.3325
A_55_P2049752	210622	Pamr1	peptidase domain containing associated with muscle regeneration 1	-0.0608314	1.03609	2.80199	0.0920529	0.672911	2.20473	0.0395416	0.745629	2.56858	-0.739873	-0.0254468	0.547712	1.58919e-08	5.30236e-15	0.366498	4.502e-06	2.17336e-13	0.69498	1.27299e-06	2.04937e-14	1.40317e-06	0.800496	10.2085	10.1477	11.2446	13.0105	10.1831	10.2226	10.9287	12.7516	9.46864	9.56069	10.1416	11.6734
A_52_P48681	12737	Cldn1	claudin 1	0.136415	1.44788	2.78279	0.0619213	0.726638	1.79641	0.0125041	1.29505	2.03573	0.145291	0.164466	0.33901	1.58867e-08	1.03636e-12	0.660571	8.14152e-05	7.29198e-10	0.929129	7.38058e-08	1.15847e-10	0.309459	0.252106	6.1927	6.32912	7.64058	8.97549	6.35717	6.36967	7.65222	8.3929	6.33799	6.39991	7.06463	8.13441
A_55_P2472735	381287	A530032D15Rik	RIKEN cDNA A530032D15Rik gene	-0.0314683	2.03991	2.78265	-0.208221	1.58018	2.06216	0.397552	2.08264	2.90253	0.20446	-0.255586	0.850154	1.34182e-09	1.35426e-11	0.222174	4.91307e-08	1.14675e-09	0.0275735	9.93536e-10	7.16004e-12	0.230248	0.13856	6.9948	6.96333	9.03471	9.77745	6.73921	7.13677	8.82186	9.64174	7.19926	6.99104	8.77944	9.26142
A_55_P2008987	12642	Ch25h	cholesterol 25-hydroxylase	1.09805	2.91908	2.77674	0.696657	2.6924	2.3693	1.00889	2.93163	2.93586	0.677192	0.0844531	3.71901e-07	2.55145e-13	5.49975e-13	8.02344e-05	8.82244e-13	6.18478e-12	1.10392e-06	2.38846e-13	2.33599e-13	0.000107394	0.532903	12.5643	13.6623	15.4833	15.341	12.6487	13.6576	15.5803	15.5846	13.2415	13.9381	15.9339	15.6108
A_51_P154842	243262	Oas1f	2'-5' oligoadenylate synthetase 1F	0.548292	2.649	2.76236	0.885129	3.15583	3.51508	0.545793	3.09745	3.14116	-0.876268	-0.137626	1.15413e-05	1.81354e-15	9.42607e-16	2.4977e-08	1.17205e-16	2.15732e-17	1.21657e-05	1.57069e-16	1.26087e-16	2.87076e-08	0.135019	12.3543	12.9026	15.0033	15.1166	12.2167	12.7625	15.3141	15.3578	11.478	12.3631	14.6339	14.9931
A_55_P2117656	276950	Slfn8	schlafen 8	1.40608	3.33612	2.73653	1.52786	3.5467	3.08458	1.23933	3.26766	2.71119	-0.227883	0.0771325	5.42883e-10	1.02999e-15	2.25234e-14	1.59982e-10	3.95489e-16	3.50034e-15	3.37089e-09	1.42388e-15	2.60191e-14	0.0476077	0.477997	11.9437	13.3497	15.2798	14.6802	12.0208	13.2601	15.2885	14.732	11.7158	13.2436	15.2625	14.8004
A_55_P2472435	55932	Gbp3	guanylate binding protein 3	0.525919	2.35471	2.73535	0.75611	2.82579	3.11956	0.383928	2.36709	2.6149	-0.408832	0.112667	5.07355e-05	4.68694e-14	4.57433e-15	6.96143e-07	2.75529e-15	5.87953e-16	0.00102756	4.3215e-14	9.21937e-15	0.00059744	0.256699	13.5457	14.0716	15.9004	16.281	13.6583	14.0423	16.0254	16.2732	13.1368	13.8929	15.9626	16.2564
A_55_P2136902	217149	Cisd3	CDGSH iron sulfur domain 3	0.145228	1.65393	2.72357	0.040828	0.932731	1.64788	0.229867	2.06584	2.93806	0.080782	-0.0464456	0.0724433	2.77307e-13	1.18428e-16	0.596031	1.48895e-09	2.93405e-13	0.0077661	8.88569e-15	3.60411e-17	0.300458	0.547003	12.6225	12.7677	14.2764	15.3461	12.576	12.8059	14.6419	15.5141	12.7033	12.7441	13.636	14.3511
A_51_P254656	15186	Hdc	histidine decarboxylase	0.16203	3.0311	2.71297	0.581179	3.8203	3.53083	0.225735	3.21445	2.86452	-0.643339	-0.395278	0.472767	3.11427e-10	1.56782e-09	0.0179915	9.86085e-12	3.22839e-11	0.320887	1.30857e-10	7.12474e-10	0.01008	0.0918478	7.36913	7.53116	10.4002	10.0821	6.97385	7.19959	10.1883	9.83837	6.72579	7.30697	10.5461	10.2566
A_55_P2099560	11810	Apobec1	apolipoprotein B mRNA editing enzyme, catalytic polypeptide 1	1.02748	2.9375	2.71052	0.935101	2.65156	2.58652	1.01497	3.1255	2.56274	-0.164163	0.0477715	2.36315e-09	2.72562e-16	9.59022e-16	9.03437e-09	1.35219e-15	1.99256e-15	2.81761e-09	1.03095e-16	2.30138e-15	0.074065	0.58564	10.7356	11.7631	13.6731	13.4461	10.7833	11.7983	13.9088	13.3461	10.5714	11.5065	13.223	13.1579
A_51_P135517	12810	Coch	coagulation factor C homolog (Limulus polyphemus)	0.0919572	1.94883	2.70843	-0.0357098	1.69512	1.93245	-0.113058	1.95274	3.23745	0.347057	0.0880618	0.570255	1.62298e-09	1.24678e-11	0.824762	1.18307e-08	1.83307e-09	0.486366	1.57666e-09	8.27102e-13	0.0440029	0.586537	7.5773	7.66926	9.52613	10.2857	7.66537	7.55231	9.61811	10.9028	7.92436	7.88865	9.61948	9.85681
A_55_P2082319	545384	BC094916	cDNA sequence BC094916	0.182893	2.90412	2.70633	0.326451	3.83935	3.75622	-0.143332	2.58577	2.4851	0.0470015	0.320515	0.087293	3.73941e-15	1.12082e-14	0.00503661	4.73957e-17	6.68304e-17	0.172616	2.27407e-14	4.20802e-14	0.645905	0.00570124	6.21691	6.3998	9.12103	8.92324	6.53743	6.39409	9.1232	9.02253	6.26391	6.59036	10.1033	10.0201
A_55_P1961034	545648	Gm13272	predicted gene 13272	0.358908	2.49388	2.69682	0.298379	2.13972	2.27919	0.389605	2.32248	2.55597	-0.049034	0.0395032	1.86683e-05	1.17937e-17	3.4435e-18	0.000134015	1.30688e-16	4.85262e-17	7.23889e-06	3.61132e-17	8.01058e-18	0.423354	0.517417	11.315	11.6739	13.8089	14.0119	11.3545	11.7441	13.677	13.9105	11.266	11.5644	13.4057	13.5452
A_55_P1992104	19271	Ptprj	protein tyrosine phosphatase, receptor type, J	0.485006	1.83841	2.69516	0.596391	1.82011	1.67324	0.408662	1.93058	2.47266	-0.0935206	-0.0232744	0.00473607	1.35264e-09	4.59035e-12	0.000972025	1.56316e-09	5.21888e-09	0.0138676	6.64548e-10	1.68906e-11	0.535816	0.876831	8.40245	8.88746	10.2409	11.0976	8.37917	8.78784	10.3098	10.8518	8.30893	8.90532	10.129	9.98217
A_55_P2081318	14683	Gnas	GNAS (guanine nucleotide binding protein, alpha stimulating) complex locus	0.180656	2.11924	2.69017	0.0702003	1.73677	1.48789	0.0674765	2.38733	2.35323	0.0827888	-0.0669759	0.183327	2.45735e-11	6.56742e-13	0.596254	4.71294e-10	4.40602e-09	0.610462	4.06397e-12	5.05584e-12	0.532823	0.613091	6.63621	6.81687	8.75546	9.32638	6.56924	6.63671	8.95656	8.92246	6.719	6.7892	8.45577	8.20689
A_55_P1999162	664787	LOC664787	Sp110 nuclear body protein-like	0.120182	1.5933	2.68305	0.763951	2.15341	2.36315	0.0561417	1.75155	2.46546	-0.108925	-0.112119	0.618308	4.99166e-06	5.07838e-09	0.00528023	1.06904e-07	3.01074e-08	0.815386	1.56616e-06	1.67178e-08	0.65134	0.641886	6.53077	6.65095	8.12408	9.21382	6.41865	6.4748	8.1702	8.88411	6.42185	7.1858	8.57526	8.785
A_55_P2141724	545652	Gm13275	predicted gene 13275	0.357662	2.50911	2.67706	0.326384	2.17974	2.26059	0.35141	2.32356	2.48435	-0.127353	-6.10314e-05	2.03475e-05	1.14432e-17	4.12853e-18	5.53651e-05	1.04338e-16	5.89204e-17	2.47825e-05	3.82762e-17	1.33747e-17	0.0495998	0.9992	11.1069	11.4645	13.616	13.7839	11.1068	11.4582	13.4304	13.5912	10.9795	11.3059	13.1592	13.2401
A_51_P422194	69307	Pxt1	peroxisomal, testis specific 1	1.50519	0.974384	2.6629	0.211592	1.48376	0.843699	0.660222	1.61137	2.67375	-0.934725	1.48254	0.000410036	0.0109192	7.20341e-07	0.540368	0.000467352	0.0240139	0.0687515	0.000215581	6.8379e-07	0.0139029	0.000470856	8.43349	9.93868	9.40787	11.0964	9.91603	10.5763	11.5274	12.5898	7.49877	7.71036	8.98253	8.34246
A_55_P2000434	207667	Skor1	SKI family transcriptional corepressor 1	0.0718394	2.54658	2.65978	-0.983263	1.2013	1.01586	0.0861689	2.07789	2.05752	1.05271	0.132335	0.747773	3.70318e-09	1.98466e-09	0.000387622	5.2798e-05	0.000285779	0.699912	6.3356e-08	7.24332e-08	0.000203017	0.555171	6.22077	6.29261	8.76735	8.88055	6.3531	6.43927	8.43099	8.41062	7.27347	6.29021	8.47477	8.28934
A_66_P125389	240328	F830016B08Rik	RIKEN cDNA F830016B08 gene	1.00462	3.28065	2.65611	1.01696	4.01207	3.71624	0.856627	3.48669	3.19153	-0.856876	0.323218	2.67859e-07	7.17161e-15	1.88794e-13	2.28008e-07	3.09782e-16	1.02652e-15	2.05436e-06	2.77709e-15	1.10058e-14	2.04701e-06	0.0147871	7.8639	8.86851	11.1446	10.52	8.18712	9.04374	11.6738	11.3786	7.00702	8.02398	11.0191	10.7233
A_55_P2090612	231805	Pilra	paired immunoglobin-like type 2 receptor alpha	0.557225	1.73259	2.6465	-0.0982046	0.709716	0.955664	-0.0360634	1.33113	2.11281	0.393716	0.532025	0.00820402	7.07181e-08	1.69107e-10	0.601996	0.00144827	9.40223e-05	0.847545	2.176e-06	4.46302e-09	0.0488592	0.0108905	6.61387	7.1711	8.34646	9.26037	7.1459	7.10983	8.47702	9.25871	7.00759	6.90938	7.7173	7.96325
A_55_P1957353	631406	Slfn13l	schlafen family member 13 like	1.35801	3.30657	2.63137	1.55	3.54871	3.12671	1.09589	3.26933	2.64031	-0.327389	0.135133	2.72141e-09	3.90455e-15	1.34865e-13	3.99525e-10	1.29653e-15	9.32497e-15	5.49316e-08	4.65789e-15	1.27986e-13	0.0114829	0.255634	11.5941	12.9521	14.9007	14.2255	11.7293	12.8252	14.9986	14.3696	11.2667	12.8167	14.8155	14.3935
A_55_P2208579	225631	Onecut2	one cut domain, family member 2	-0.134074	1.29123	2.62978	0.0958945	0.717779	1.80993	0.0270994	1.28993	2.4377	-0.261559	-0.00367131	0.212032	1.22901e-09	2.66001e-14	0.366253	3.36014e-06	8.19513e-12	0.796052	1.24708e-09	8.60332e-14	0.0220802	0.972038	8.04859	7.91452	9.33983	10.6784	8.04492	8.07202	9.33485	10.4826	7.78703	7.88293	8.50481	9.59696
A_55_P2124976	195733	Grhl1	grainyhead-like 1 (Drosophila)	0.300806	2.07139	2.62655	0.0116458	0.773338	1.31325	0.169145	1.98518	2.45881	0.0579574	-0.0745317	0.00151939	1.62951e-14	4.01842e-16	0.884201	3.78321e-08	1.75647e-11	0.0473621	3.15078e-14	1.12769e-15	0.472127	0.357728	6.64377	6.94457	8.71516	9.27031	6.56924	6.73838	8.55442	9.02805	6.70173	6.71337	7.47506	8.01498
A_55_P1964812	21418	Tfap2a	transcription factor AP-2, alpha	-0.0240604	2.46003	2.62179	0.00925073	2.00276	1.9704	0.0356265	1.93434	2.25551	-1.06464	0.0620602	0.917627	1.09648e-08	4.45338e-09	0.968276	1.83002e-07	2.27105e-07	0.878312	2.89668e-07	3.66629e-08	0.00027291	0.78985	8.3702	8.34614	10.8302	10.992	8.43226	8.46788	10.3666	10.6878	7.30556	7.31481	9.30832	9.27595
A_55_P2133248	668139	Gm8995	predicted gene 8995	0.648392	2.79046	2.61636	0.500902	3.16094	3.19741	0.763519	3.28841	2.37429	-0.795776	0.383306	4.53642e-05	7.35366e-14	1.98705e-13	0.00057559	1.06479e-14	8.90869e-15	7.16724e-06	5.75703e-15	8.82385e-13	4.37661e-06	0.00474916	7.78263	8.43102	10.5731	10.399	8.16594	8.92946	11.4543	10.5402	6.98686	7.48776	10.1478	10.1843
A_52_P638459	20304	Ccl5	chemokine (C-C motif) ligand 5	0.285625	2.24311	2.60659	0.472237	3.65469	4.31325	0.174331	2.09519	2.48692	-2.00768	0.0987175	0.000417159	2.00783e-16	1.90155e-17	1.7349e-06	9.25511e-20	6.75474e-21	0.0154816	5.84157e-16	3.97896e-17	1.13804e-15	0.144334	15.9968	16.2824	18.2399	18.6034	16.0955	16.2698	18.1907	18.5824	13.9891	14.4613	17.6438	18.3024
A_55_P2097259	72580	Zufsp	zinc finger with UFM1-specific peptidase domain	0.820086	3.16322	2.60121	0.726521	2.99347	2.32573	0.66482	3.05476	2.26792	-0.307595	0.0534457	1.84055e-09	1.87639e-18	4.07088e-17	1.03361e-08	4.47261e-18	2.3561e-16	3.55457e-08	3.25079e-18	3.49438e-16	0.000322658	0.439077	11.6011	12.4212	14.7643	14.2023	11.6545	12.3193	14.7093	13.9224	11.2935	12.02	14.287	13.6192
A_51_P312121	22436	Xdh	xanthine dehydrogenase	-0.0019413	2.20206	2.59839	0.087026	3.0447	3.5694	0.196711	2.70546	2.55766	0.164396	0.0713773	0.980901	7.8745e-15	5.95619e-16	0.291894	4.96787e-17	4.07876e-18	0.0255438	3.1663e-16	7.62544e-16	0.0562524	0.384585	8.65435	8.65241	10.8564	11.2527	8.72572	8.92244	11.4312	11.2834	8.81874	8.90577	11.8634	12.3881
A_51_P158073	319278	A230050P20Rik	RIKEN cDNA A230050P20 gene	0.441013	2.52808	2.59533	0.626298	2.73243	2.74885	0.457976	2.11403	2.61377	0.084875	0.0518705	0.0410743	9.52843e-10	6.50175e-10	0.00615013	3.05856e-10	2.80059e-10	0.0347565	1.22733e-08	5.86321e-10	0.674468	0.797061	9.9222	10.3632	12.4503	12.5175	9.97407	10.432	12.0881	12.5878	10.0071	10.6334	12.7395	12.7559
A_55_P2077068	240354	Malt1	mucosa associated lymphoid tissue lymphoma translocation gene 1	0.118936	0.697021	2.59477	0.036255	0.196991	1.7571	0.100518	1.03	2.82263	0.252325	0.175273	0.15904	2.08767e-07	6.92222e-16	0.658464	0.0264096	2.93986e-13	0.2298	8.97908e-10	1.85374e-16	0.00644495	0.0448671	9.1404	9.25934	9.83742	11.7352	9.31568	9.41619	10.3457	12.1383	9.39273	9.42898	9.58972	11.1498
A_51_P423578	20556	Slfn2	schlafen 2	0.625172	2.40823	2.59466	0.903482	2.6713	3.06834	0.74258	2.89425	2.75299	-0.298811	-0.0398746	4.8715e-07	1.11494e-15	3.47399e-16	3.14823e-09	2.20216e-16	2.50382e-17	4.91395e-08	6.26562e-17	1.37357e-16	0.00134736	0.611749	12.1516	12.7768	14.5598	14.7463	12.1117	12.8543	15.006	14.8647	11.8528	12.7563	14.5241	14.9211
A_55_P2021810	11838	Arc	activity regulated cytoskeletal-associated protein	-0.1063	2.2216	2.592	-0.0264634	2.97351	3.1921	0.049168	2.83469	3.37613	-0.676857	-0.538523	0.379553	2.69097e-12	2.53895e-13	0.824825	3.04506e-14	1.01247e-14	0.681475	6.38289e-14	4.23213e-15	3.05305e-05	0.000315218	9.84328	9.73698	12.0649	12.4353	9.30476	9.35393	12.1395	12.6809	9.16643	9.13996	12.1399	12.3585
A_66_P116372	223920	Soat2	sterol O-acyltransferase 2	0.457166	1.82014	2.58699	0.179384	0.776841	1.38055	0.389675	1.60553	2.06736	1.67467	-0.117458	3.25638e-06	7.02616e-15	2.87167e-17	0.0146513	2.69323e-09	5.04555e-13	2.11337e-05	4.9239e-14	9.64235e-16	2.56244e-14	0.0920059	8.23136	8.68853	10.0515	10.8184	8.1139	8.50358	9.71943	10.1813	9.90603	10.0854	10.6829	11.2866
A_55_P1975560	15951	Ifi204	interferon activated gene 204	0.874692	2.47939	2.58556	1.08875	3.01278	3.00052	0.875409	2.61265	2.50182	-0.496029	-0.0337776	7.19595e-09	1.05712e-15	5.48846e-16	3.0484e-10	4.99586e-17	5.32628e-17	7.11306e-09	4.66279e-16	9.18378e-16	1.14665e-05	0.674772	14.8693	15.744	17.3487	17.4549	14.8355	15.7109	17.4482	17.3373	14.3733	15.462	17.3861	17.3738
A_55_P2059931	19126	Prom1	prominin 1	0.136186	2.57608	2.58146	0.166238	2.42307	2.0966	-0.0210793	2.48883	2.29764	0.130906	0.03072	0.0331303	5.00818e-18	4.84644e-18	0.0116997	1.31234e-17	1.27342e-16	0.722744	8.61304e-18	3.02598e-17	0.039552	0.605934	6.86755	7.00374	9.44363	9.44901	6.89827	6.87719	9.3871	9.19591	6.99846	7.1647	9.42153	9.09506
A_51_P134812	69065	Chac1	ChaC, cation transport regulator 1	0.813377	1.78699	2.57621	-0.0277597	0.579459	1.42099	0.880155	1.97212	3.02602	0.77702	-0.148201	1.72296e-09	1.17893e-14	3.87515e-17	0.681866	1.91792e-07	4.07165e-13	5.47755e-10	2.54105e-15	3.08418e-18	3.32319e-09	0.040615	12.2065	13.0199	13.9935	14.7827	12.0583	12.9384	14.0304	15.0843	12.9835	12.9557	13.563	14.4045
A_55_P2367250	18996	Pou4f1	POU domain, class 4, transcription factor 1	-0.0127527	2.26184	2.57277	0.094453	1.646	1.5003	-0.0547217	1.91069	2.29258	0.0203992	0.0732111	0.897382	1.12003e-13	1.52445e-14	0.3463	1.43608e-11	5.76749e-11	0.581744	1.49406e-12	9.09319e-14	0.836625	0.462863	6.58934	6.57659	8.85118	9.16211	6.66255	6.60783	8.57324	8.95513	6.60974	6.70419	8.25574	8.11004
A_55_P2000515	67245	Peli1	pellino 1	0.621747	2.58975	2.57225	0.311103	2.18419	1.86161	0.467544	2.53512	2.35441	0.159697	0.105919	0.00123173	2.41549e-11	2.67434e-11	0.0674353	3.04085e-10	3.09539e-09	0.00947783	3.32607e-11	1.00276e-10	0.328755	0.513545	12.0267	12.6485	14.6165	14.599	12.1326	12.6002	14.6678	14.4871	12.1864	12.4975	14.3706	14.048
A_55_P2016034	434341	Nlrc5	NLR family, CARD domain containing 5	1.08392	3.37846	2.56864	1.31682	4.23361	3.46655	0.841472	3.39427	3.0684	-0.760413	-0.0228053	6.71363e-08	2.96021e-15	2.07218e-13	4.4586e-09	8.679e-17	1.98135e-15	1.82395e-06	2.75229e-15	1.32426e-14	6.24767e-06	0.845337	10.6988	11.7827	14.0773	13.2675	10.676	11.5175	14.0703	13.7444	9.93839	11.2552	14.172	13.4049
A_55_P1975481	19218	Ptger3	prostaglandin E receptor 3 (subtype EP3)	0.319715	1.65051	2.56698	0.114359	1.43561	1.92698	0.0944586	0.794487	1.82738	0.0458236	0.214584	0.285672	3.37036e-05	1.51648e-07	0.697945	0.000145092	5.73473e-06	0.748355	0.0144454	1.06999e-05	0.876168	0.469173	6.44775	6.76747	8.09827	9.01473	6.66234	6.7568	7.45683	8.48972	6.49358	6.60794	7.92919	8.42056
A_55_P2098697	21928	Tnfaip2	tumor necrosis factor, alpha-induced protein 2	0.453525	1.21241	2.56285	0.213434	0.834877	1.77693	0.294412	1.29511	2.30625	0.214035	0.382582	3.27826e-05	6.54581e-11	6.67603e-16	0.0161485	1.45978e-08	1.97288e-13	0.00191745	2.43822e-11	3.46592e-15	0.0159009	0.000191455	13.4935	13.947	14.7059	16.0563	13.8761	14.1705	15.1712	16.1823	13.7075	13.921	14.5424	15.4845
A_51_P359570	15959	Ifit3	interferon-induced protein with tetratricopeptide repeats 3	1.59534	2.58761	2.56231	1.81576	3.18512	3.12081	1.41962	2.64256	2.47126	-0.66937	0.211835	1.14785e-11	6.80734e-15	7.93146e-15	1.60876e-12	2.65541e-16	3.65454e-16	6.61217e-11	4.9082e-15	1.39186e-14	2.21282e-06	0.0368138	15.6237	17.219	18.2113	18.186	15.8355	17.2551	18.478	18.3068	14.9543	16.77	18.1394	18.0751
A_51_P208931	212706	N4bp3	NEDD4 binding protein 3	0.265095	1.23106	2.5467	0.133306	0.171191	1.35981	0.451577	1.20752	3.04653	0.424516	-0.258276	0.0812031	2.12889e-07	6.15646e-12	0.363088	0.246786	5.58953e-08	0.00596483	2.7466e-07	3.99481e-13	0.00886721	0.0885878	9.25745	9.52254	10.4885	11.8041	8.99917	9.45075	10.2067	12.0457	9.68197	9.81527	9.85316	11.0418
A_51_P387123	23962	Oasl2	2'-5' oligoadenylate synthetase-like 2	0.606227	2.26098	2.54498	0.80765	2.54872	2.57361	0.533959	2.2965	2.41814	-0.26511	0.0530551	9.55019e-06	7.84747e-14	1.25441e-14	2.68824e-07	1.2261e-14	1.05421e-14	3.98397e-05	6.16723e-14	2.77336e-14	0.0132199	0.584547	13.5423	14.1486	15.8033	16.0873	13.5954	14.1293	15.8919	16.0135	13.2772	14.0849	15.8259	15.8508
A_51_P497724	75761	Apol7a	apolipoprotein L 7a	0.713451	2.93191	2.5417	0.928135	2.9777	2.3809	0.508393	2.58478	2.13207	-0.551121	-0.0769989	4.09386e-06	5.7573e-15	5.28441e-14	1.42998e-07	4.52299e-15	1.45015e-13	0.000170692	4.07374e-14	7.91011e-13	7.52739e-05	0.470572	8.6413	9.35475	11.5732	11.183	8.5643	9.0727	11.1491	10.6964	8.09018	9.01831	11.0679	10.4711
A_55_P1998957	114643	Oas1c	2'-5' oligoadenylate synthetase 1C	0.689235	2.98366	2.54064	0.901519	3.17561	2.81892	0.632174	2.79969	2.36711	-0.707468	-0.0795266	5.89597e-06	4.11357e-15	4.99224e-14	1.99475e-07	1.55571e-15	9.95636e-15	1.61163e-05	1.10743e-14	1.48904e-13	4.31326e-06	0.454568	10.8736	11.5628	13.8573	13.4142	10.7941	11.4262	13.5938	13.1612	10.1661	11.0676	13.3417	12.985
A_51_P249118	18670	Abcb4	ATP-binding cassette, sub-family B (MDR/TAP), member 4	0.276595	1.42315	2.53913	0.279381	1.08296	1.59325	0.338399	1.62706	2.9242	0.68351	-0.19811	0.0148318	2.26208e-10	3.44013e-14	0.0140181	1.16184e-08	4.22661e-11	0.00416512	3.08611e-11	3.83436e-15	4.85294e-06	0.0681382	10.8247	11.1013	12.2478	13.3638	10.6265	10.9649	12.2536	13.5507	11.5082	11.7875	12.5911	13.1014
A_55_P2100824	676689	LOC676689	H-2 class I histocompatibility antigen, L-D alpha chain precursor-like	0.157919	1.72538	2.53339	0.140149	1.85626	2.58895	0.228296	1.86314	2.77412	-0.795971	-0.0580288	0.154165	2.39441e-11	6.79972e-14	0.202947	7.95058e-12	4.86109e-14	0.0461326	7.51807e-12	1.66606e-14	1.24611e-06	0.590055	12.3918	12.5497	14.1172	14.9252	12.3338	12.5621	14.1969	15.1079	11.5958	11.736	13.4521	14.1848
A_55_P2135200	237887	Slfn10-ps	schlafen 10, pseudogene	1.07986	3.08306	2.53226	1.13058	3.1378	2.72638	1.12527	3.37179	2.76045	-0.053307	0.0240034	2.6224e-10	2.60396e-17	5.69853e-16	1.3311e-10	1.97483e-17	1.79281e-16	1.42721e-10	6.3721e-18	1.47571e-16	0.501883	0.761018	10.6605	11.7404	13.7436	13.1928	10.6846	11.8098	14.0563	13.445	10.6072	11.7378	13.745	13.3336
A_55_P2160750	77018	Col25a1	collagen, type XXV, alpha 1	0.0307926	1.40745	2.52788	0.114457	1.29817	2.31548	-0.0101541	1.47973	2.05223	-0.0717899	0.0510357	0.692059	3.89726e-12	4.55608e-16	0.153422	1.32479e-11	1.79571e-15	0.895854	1.81816e-12	1.17646e-14	0.361102	0.513395	6.48999	6.52079	7.89745	9.01787	6.54103	6.53087	8.02076	8.59326	6.4182	6.53266	7.71638	8.73369
A_55_P2113256	101187	Parp11	poly (ADP-ribose) polymerase family, member 11	0.394957	2.71346	2.5264	0.517664	2.95812	2.81283	0.351387	2.38561	2.02325	-0.291408	-0.0243388	0.000658369	3.5936e-15	1.09227e-14	4.67179e-05	9.34189e-16	2.05098e-15	0.00174525	2.66016e-14	3.38611e-13	0.00671241	0.798034	8.06929	8.46425	10.7828	10.5957	8.04495	8.39634	10.4306	10.0682	7.77789	8.29555	10.736	10.5907
A_52_P574653	12122	Bid	BH3 interacting domain death agonist	0.27111	1.97147	2.52092	0.150586	1.68479	1.9616	0.26258	2.14927	2.44257	0.0590897	0.233463	0.0014718	6.56796e-15	1.41024e-16	0.0490094	7.5157e-14	7.10154e-15	0.001897	1.70978e-15	2.31287e-16	0.415276	0.00451405	11.8991	12.1702	13.8706	14.42	12.1326	12.3952	14.2819	14.5752	11.9582	12.1088	13.643	13.9198
A_52_P223524	69440	Dennd6b	DENN/MADD domain containing 6B	0.137501	2.31075	2.51448	0.369963	2.61458	2.89696	0.0927987	2.23046	2.49352	-0.358725	-0.236707	0.247337	9.79377e-13	2.67875e-13	0.00526568	1.46829e-13	3.00749e-14	0.429577	1.6813e-12	3.04673e-13	0.0064668	0.0553844	8.85184	8.98934	11.1626	11.3663	8.61513	8.70793	10.8456	11.1087	8.49312	8.86308	11.1077	11.3901
A_55_P2101776	11539	Adora1	adenosine A1 receptor	0.190043	1.57423	2.50174	0.146844	0.676475	1.12322	0.2156	1.16713	2.30719	-0.0131315	-0.00455887	0.015841	2.02051e-13	1.49825e-16	0.053418	5.12508e-08	3.43395e-11	0.00748045	1.93079e-11	5.32281e-16	0.854334	0.949155	6.39158	6.58163	7.96581	8.89332	6.38702	6.60262	7.55415	8.69422	6.37845	6.52529	7.05493	7.50167
A_55_P1957835	208922	Cpeb3	cytoplasmic polyadenylation element binding protein 3	0.190403	2.07575	2.49323	0.132175	1.96341	2.31746	-0.00432656	2.08053	2.44477	-0.288199	0.193592	0.00788086	4.52543e-16	2.55616e-17	0.0511524	1.0801e-15	8.0556e-17	0.945812	4.36544e-16	3.4793e-17	0.000302427	0.00708747	8.92575	9.11615	11.0015	11.419	9.11934	9.11502	11.1999	11.5641	8.63755	8.76973	10.601	10.955
A_51_P111612	66412	Arrdc4	arrestin domain containing 4	0.335105	1.60962	2.48443	0.0826689	0.813245	1.83152	0.298007	2.09314	2.91257	-0.00609705	0.142291	0.00185754	6.08425e-12	7.66649e-15	0.371593	1.16863e-07	8.50506e-13	0.00442423	1.09183e-13	6.41924e-16	0.946778	0.133221	9.82731	10.1624	11.4369	12.3117	9.9696	10.2676	12.0627	12.8822	9.82121	9.90388	10.6345	11.6527
A_52_P223809	80861	Dhx58	DEXH (Asp-Glu-X-His) box polypeptide 58	0.625841	2.62261	2.48014	0.886155	2.74302	2.64906	0.607675	2.61128	2.21855	-0.376388	-0.0103085	6.55848e-08	2.79926e-17	6.72878e-17	4.75646e-10	1.3824e-17	2.39091e-17	9.77251e-08	2.99627e-17	3.86028e-16	3.54485e-05	0.878386	11.4744	12.1002	14.097	13.9545	11.4641	12.0717	14.0753	13.6826	11.098	11.9841	13.841	13.7471
A_51_P413866	14962	Cfb	complement factor B	0.144916	2.11405	2.47624	0.360323	2.8405	3.37941	-0.0298875	2.35413	2.45244	0.608961	0.0194348	0.20712	2.12435e-12	1.88176e-13	0.00485664	2.25468e-14	1.50922e-15	0.789689	4.09624e-13	2.18359e-13	4.74403e-05	0.862219	10.6816	10.8266	12.7957	13.1579	10.7011	10.6712	13.0552	13.1535	11.2906	11.6509	14.1311	14.67
A_55_P2156394	330660	Btbd16	BTB (POZ) domain containing 16	0.885505	2.72685	2.47015	0.684064	2.35837	2.2898	0.874795	2.86454	2.33325	-0.102996	0.0291828	2.15937e-08	9.8588e-16	4.61003e-15	6.84228e-07	9.47699e-15	1.49893e-14	2.55639e-08	4.56347e-16	1.11935e-14	0.251354	0.740297	9.62209	10.5076	12.3489	12.0922	9.65127	10.5261	12.5158	11.9845	9.51909	10.2032	11.8775	11.8089
A_51_P277006	68947	Chst8	carbohydrate (N-acetylgalactosamine 4-0) sulfotransferase 8	0.0163191	0.647288	2.46435	0.011483	0.693908	2.16076	-0.0558067	0.639972	2.08325	0.294905	0.0153297	0.871663	7.47602e-06	4.13033e-14	0.909478	3.24956e-06	3.1409e-13	0.582337	8.54374e-06	5.5045e-13	0.00915127	0.879376	6.52893	6.54525	7.17622	8.99328	6.54426	6.48845	7.18423	8.6275	6.82383	6.83532	7.51774	8.9846
A_55_P2026233	74153	Uba7	ubiquitin-like modifier activating enzyme 7	0.752291	2.59801	2.46253	1.08329	2.94115	2.96091	0.666152	2.43557	2.47055	-0.348761	-0.0950737	1.10677e-06	1.65952e-14	3.80771e-14	8.24384e-09	2.40733e-15	2.16858e-15	4.94956e-06	4.51551e-14	3.62064e-14	0.00281468	0.350367	12.2924	13.0447	14.8904	14.7549	12.1973	12.8634	14.6329	14.6678	11.9436	13.0269	14.8848	14.9045
A_66_P100798	432939	Gm5468	predicted gene 5468	0.0158078	1.81735	2.45641	-0.0409489	1.28214	1.53661	-0.0656805	1.53096	2.03982	-0.087259	-0.0101932	0.899072	1.04236e-10	1.10443e-12	0.742861	1.61052e-08	1.22351e-09	0.599737	1.29058e-09	1.85365e-11	0.487154	0.934808	7.37135	7.38716	9.1887	9.82777	7.36116	7.29548	8.89212	9.40098	7.28409	7.24314	8.56623	8.8207
A_52_P598309	68949	1500012F01Rik	RIKEN cDNA 1500012F01 gene	0.577266	1.87046	2.44374	0.22568	1.20379	1.82915	0.606034	1.15092	2.17909	0.0874027	0.0023287	0.0348101	1.38643e-06	4.09914e-08	0.380356	0.000195645	1.8325e-06	0.0277282	0.000300999	1.92715e-07	0.731327	0.992687	14.4667	15.044	16.3371	16.9104	14.469	15.075	15.6199	16.6481	14.5541	14.7798	15.7579	16.3832
A_55_P2063402	435791	Gm13271	predicted gene 13271	0.178748	2.30029	2.44302	0.234336	2.08568	2.22405	0.332468	2.29842	2.13348	-0.0311638	-0.0762603	0.00890012	4.55681e-17	1.76973e-17	0.00127329	2.11729e-16	7.73385e-17	4.59538e-05	4.61516e-17	1.48443e-16	0.610514	0.221874	10.1313	10.31	12.4315	12.5743	10.055	10.3875	12.3534	12.1885	10.1001	10.3344	12.1858	12.3241
A_55_P2128499	216864	Mgl2	macrophage galactose N-acetyl-galactosamine specific lectin 2	0.211028	1.49788	2.43391	0.0792257	0.754859	1.38254	0.197368	1.45379	2.358	0.195652	-0.0254762	0.00683113	2.51325e-13	1.32057e-16	0.26062	6.79351e-09	8.59808e-13	0.0103791	3.97877e-13	2.16976e-16	0.0109358	0.712531	13.7534	13.9644	15.2513	16.1873	13.7279	13.9253	15.1817	16.0859	13.949	14.0283	14.7039	15.3316
A_52_P474902	73368	Col20a1	collagen, type XX, alpha 1	0.247477	1.38678	2.43006	0.161666	1.08366	1.71535	-0.0232383	1.37898	2.00082	-0.702957	0.00976995	0.0495914	2.53243e-09	5.86158e-13	0.184138	7.94742e-08	1.13279e-10	0.844326	2.74567e-09	1.12979e-11	1.78943e-05	0.934171	7.59381	7.84129	8.98059	10.0239	7.60358	7.58035	8.98257	9.60441	6.89086	7.05252	7.97452	8.60621
A_55_P2088995	22038	Plscr1	phospholipid scramblase 1	0.376289	2.05695	2.41882	0.212513	1.74865	1.97296	0.407349	2.1543	2.12366	0.286091	0.128573	0.00140549	4.96232e-13	4.07871e-14	0.0446749	5.90966e-12	9.40003e-13	0.000721744	2.43808e-13	3.03931e-13	0.00978169	0.205915	13.3679	13.7441	15.4248	15.7867	13.4964	13.9038	15.6507	15.6201	13.6539	13.8665	15.4026	15.6269
A_55_P2075200	30935	Tor3a	torsin family 3, member A	1.30341	2.84227	2.40362	1.44002	2.97053	2.77605	1.0756	2.53729	2.18663	-0.364207	0.0880159	5.5592e-11	3.4573e-16	4.73818e-15	1.24525e-11	1.73177e-16	4.99989e-16	9.43516e-10	2.03798e-15	2.06251e-14	0.000539539	0.312277	13.1342	14.4376	15.9765	15.5378	13.2222	14.2978	15.7595	15.4088	12.77	14.21	15.7405	15.546
A_55_P1996171	76073	Pcgf5	polycomb group ring finger 5	0.36705	2.48769	2.40258	0.488714	2.61127	2.32791	0.183173	2.39831	2.57221	-0.129045	-0.0737869	0.000236011	7.79441e-16	1.34276e-15	1.12956e-05	3.65093e-16	2.198e-15	0.0316831	1.38055e-15	4.62232e-16	0.116595	0.356832	11.2114	11.5784	13.6991	13.614	11.1376	11.3208	13.5359	13.7098	11.0823	11.5711	13.6936	13.4103
A_52_P577384	16068	Il18bp	interleukin 18 binding protein	-0.079603	2.06437	2.39394	0.199051	2.95705	3.43839	0.173347	2.45941	2.90557	0.0714329	-0.21644	0.205399	2.69299e-16	2.63703e-17	0.00454387	9.48715e-19	8.78719e-20	0.0110562	1.72573e-17	1.25126e-18	0.253472	0.00247736	8.80122	8.72162	10.8656	11.1952	8.58478	8.75813	11.0442	11.4903	8.87265	9.07171	11.8297	12.311
A_55_P2108868	27275	Nufip1	nuclear fragile X mental retardation protein interacting protein 1	0.242566	2.00225	2.3881	0.201861	2.00601	2.01176	0.231019	2.12802	2.30953	-0.269151	-0.00808545	0.0295099	1.3733e-12	9.15898e-14	0.0640561	1.33448e-12	1.27743e-12	0.0369302	5.40461e-13	1.53479e-13	0.0174201	0.93745	9.26106	9.50363	11.2633	11.6492	9.25297	9.48399	11.381	11.5625	8.99191	9.19377	10.9979	11.0037
A_55_P1997595	74338	Slc6a19	solute carrier family 6 (neurotransmitter transporter), member 19	0.0766761	2.15773	2.38764	0.0990553	2.2937	2.21775	0.205053	2.05562	2.00027	-0.00778212	-0.029913	0.493591	1.39794e-12	2.96144e-13	0.378843	5.48602e-13	9.19043e-13	0.07946	2.92746e-12	4.43286e-12	0.944187	0.78808	6.1825	6.25918	8.34023	8.57014	6.15259	6.35764	8.20821	8.15285	6.17472	6.27377	8.46842	8.39246
A_55_P2055742	109254	Adtrp	androgen dependent TFPI regulating protein	-0.0370883	1.62328	2.3829	0.1415	0.915772	1.34772	0.0252958	1.48981	2.35696	0.368037	-0.196749	0.671792	2.6875e-12	7.24655e-15	0.119241	1.22669e-08	4.45683e-11	0.772257	9.87545e-12	8.59194e-15	0.000580374	0.0360775	7.02805	6.99096	8.65132	9.41095	6.8313	6.85659	8.32111	9.18825	7.39608	7.53758	8.31185	8.7438
A_51_P412835	13163	Daxx	Fas death domain-associated protein	1.12214	2.97863	2.37867	1.18756	3.10906	2.53441	1.01658	3.0437	2.34577	-0.167169	-0.0368202	1.47885e-11	3.94416e-18	1.35153e-16	6.28152e-12	2.00831e-18	4.99705e-17	6.5042e-11	2.80661e-18	1.68134e-16	0.023079	0.587344	13.7372	14.8594	16.7159	16.1159	13.7004	14.717	16.7441	16.0462	13.5701	14.7576	16.6791	16.1045
A_55_P2042500	246747	Adig	adipogenin	0.675879	1.5793	2.36967	0.104172	0.951093	1.17348	0.405954	1.42218	2.53259	-0.379794	0.564105	0.00241753	3.04134e-07	1.08878e-09	0.58651	0.000116978	1.19764e-05	0.0461171	1.17194e-06	4.12817e-10	0.060138	0.00843043	7.6044	8.28028	9.1837	9.97407	8.16851	8.57446	9.59069	10.7011	7.22461	7.32878	8.1757	8.39809
A_55_P2052106	193286	BC049762	cDNA sequence BC049762	0.483985	2.12176	2.36928	0.299171	1.52136	1.73735	0.0599889	2.10801	2.12029	-0.0166497	0.269209	8.38463e-05	1.35726e-13	2.46317e-14	0.00521002	2.16484e-11	2.90499e-12	0.525601	1.50035e-13	1.37182e-13	0.859326	0.0102415	7.34567	7.82966	9.46743	9.71495	7.61488	7.67487	9.72289	9.73517	7.32902	7.62819	8.85038	9.06637
A_66_P109986	12489	Cd33	CD33 antigen	0.164306	1.08848	2.35735	0.0632756	0.112274	0.284476	0.0849753	0.804603	1.50647	1.14763	-0.0379218	0.564418	0.00129451	2.912e-07	0.823572	0.692903	0.323454	0.764772	0.0109037	6.1157e-05	0.000830822	0.89365	6.25093	6.41524	7.33941	8.60828	6.21301	6.29799	7.01761	7.71948	7.39857	7.46184	7.51084	7.68304
A_52_P483799	623121	Pydc4	pyrin domain containing 4	0.310925	2.18171	2.35487	0.378254	3.07027	3.14151	0.304745	2.56104	2.05666	-0.091013	-0.0700018	0.00694715	3.12197e-13	9.62299e-14	0.00169688	1.56197e-15	1.09172e-15	0.00789938	2.62601e-14	7.72374e-13	0.377872	0.495421	6.2019	6.51283	8.38362	8.55678	6.1319	6.43664	8.69294	8.18856	6.11089	6.48914	9.18116	9.2524
A_52_P534235	20811	Srms	src-related kinase lacking C-terminal regulatory tyrosine and N-terminal myristylation sites	0.0379339	1.04134	2.35255	-0.0684874	0.857694	1.72949	0.126416	1.19613	2.18725	-0.0903297	-0.267316	0.673627	2.97287e-09	1.37825e-14	0.449912	4.51988e-08	1.57991e-12	0.172131	3.98464e-10	4.26602e-14	0.322222	0.00813153	6.62555	6.66348	7.66689	8.9781	6.35823	6.48465	7.55437	8.54548	6.53522	6.46673	7.39291	8.26471
A_55_P2410240	328576	Gm20556	predicted gene, 20556	0.42616	3.34598	2.35039	0.376544	3.16272	2.18085	0.22799	3.00239	1.95556	0.175655	0.172831	1.24556e-05	9.85187e-19	2.5376e-16	4.92993e-05	2.3931e-18	8.18819e-16	0.00424449	5.42882e-18	4.48852e-15	0.020696	0.0224934	6.39181	6.81797	9.73779	8.7422	6.56464	6.79263	9.56703	8.5202	6.56746	6.94401	9.73019	8.74831
A_55_P2137611	54396	Irgm2	immunity-related GTPase family M member 2	1.29067	2.879	2.34633	1.50904	3.0996	2.69596	1.12286	2.58732	1.88119	-0.453292	0.11392	6.15206e-10	3.08457e-15	7.39196e-14	6.11857e-11	9.74389e-16	8.57824e-15	4.5879e-09	1.62549e-14	2.19879e-12	0.000294296	0.263489	13.5029	14.7936	16.3819	15.8492	13.6168	14.7397	16.2041	15.498	13.0496	14.5587	16.1492	15.7456
A_52_P570266	19171	Psmb10	proteasome (prosome, macropain) subunit, beta type 10	0.372956	2.27731	2.33438	0.450414	2.41388	2.51363	0.309962	2.15923	2.37247	-0.0082129	0.0151419	0.00444796	9.50549e-13	6.50634e-13	0.00104804	3.89189e-13	2.08782e-13	0.0142387	2.14339e-12	5.07623e-13	0.942767	0.894719	14.7636	15.1366	17.0409	17.098	14.7788	15.0887	16.938	17.1512	14.7554	15.2058	17.1693	17.269
A_55_P2076757	98999	Znfx1	zinc finger, NFX1-type containing 1	0.8895	2.41548	2.33429	0.986556	2.58225	2.47797	0.780036	2.37835	2.1539	-0.549538	0.011821	9.56235e-10	2.28847e-16	3.9089e-16	2.09806e-10	8.03452e-17	1.53359e-16	6.29971e-09	2.91685e-16	1.3744e-15	7.23721e-07	0.867667	14.0605	14.95	16.476	16.3948	14.0724	14.8524	16.4507	16.2263	13.511	14.4976	16.0933	15.989
A_55_P2126448	66293	1810032O08Rik	RIKEN cDNA 1810032O08 gene	0.475706	1.50262	2.33112	0.145092	0.636133	1.59373	0.552702	1.52421	2.2639	0.0404466	-0.180675	4.10185e-07	1.99458e-14	2.08376e-17	0.0233532	7.86386e-09	7.99188e-15	5.54464e-08	1.5984e-14	3.29993e-17	0.494403	0.00659154	12.2808	12.7565	13.7835	14.612	12.1002	12.6529	13.6244	14.3641	12.3213	12.4664	12.9574	13.915
A_55_P2063715	74453	Ccdc11	coiled-coil domain containing 11	0.00886126	0.487016	2.32955	-0.0565597	0.172087	1.08667	-0.104543	0.498035	1.92522	-0.00422666	-0.0403022	0.930972	0.000186525	1.20279e-13	0.582147	0.106918	1.0294e-08	0.314706	0.000149559	2.23962e-12	0.96704	0.694296	6.51657	6.52543	7.00358	8.84611	6.47627	6.37172	6.9743	8.40149	6.51234	6.45578	6.68443	7.59902
A_51_P424532	22361	Vnn1	vanin 1	0.205788	2.04404	2.32716	0.233387	2.67584	2.80032	0.013954	1.88758	1.95594	-0.753881	0.216006	0.0415568	2.56785e-13	3.46458e-14	0.0230855	3.95798e-15	1.94786e-15	0.882377	8.71692e-13	5.0535e-13	4.83183e-07	0.0335106	10.4243	10.6301	12.4683	12.7514	10.6403	10.6542	12.5279	12.5962	9.6704	9.90379	12.3462	12.4707
A_51_P463003	53603	Tslp	thymic stromal lymphopoietin	0.287707	1.25428	2.32333	0.304379	1.56677	2.53517	0.287377	1.9983	3.06365	-1.13198	-0.00426884	0.00325215	7.95052e-11	6.42403e-15	0.00213253	2.78615e-12	1.64862e-15	0.00327943	6.6562e-14	8.51307e-17	3.62373e-10	0.959684	10.7111	10.9988	11.9654	13.0344	10.7068	10.9942	12.7051	13.7705	9.57911	9.88349	11.1459	12.1143
A_52_P85174	142980	Tlr3	toll-like receptor 3	0.682255	3.26188	2.32154	0.986235	3.72965	2.78005	0.68251	3.69873	2.09274	-0.0354184	-0.0344028	2.12719e-06	2.34486e-16	4.69202e-14	1.62607e-08	2.86462e-17	2.85165e-15	2.11738e-06	3.26482e-17	2.32787e-13	0.712519	0.720378	8.00453	8.68678	11.2664	10.3261	7.97012	8.65263	11.6688	10.0629	7.96911	8.95534	11.6988	10.7492
A_51_P472867	246727	Oas3	2'-5' oligoadenylate synthetase 3	0.453098	2.3911	2.31459	0.578481	2.84393	2.93508	0.332053	2.37174	2.82324	-0.302822	-0.289162	0.000866712	3.49282e-13	5.75454e-13	8.60903e-05	2.39912e-14	1.47035e-14	0.00857822	3.95759e-13	2.68671e-14	0.0147922	0.0190188	7.57969	8.03279	9.9708	9.89429	7.29053	7.62258	9.66227	10.1138	7.27687	7.85535	10.1208	10.212
A_55_P2045896	14573	Gdnf	glial cell line derived neurotrophic factor	0.35436	2.3173	2.3118	0.259152	2.3673	2.18489	0.29127	2.11445	2.29442	-0.342442	0.0429186	0.00175203	4.79016e-14	4.96959e-14	0.0144295	3.44192e-14	1.18919e-13	0.00713325	1.97095e-13	5.58522e-14	0.00228511	0.655407	10.8466	11.201	13.1639	13.1584	10.8895	11.1808	13.004	13.1839	10.5042	10.7633	12.8715	12.6891
A_51_P478722	21822	Tgtp1	T cell specific GTPase 1	0.848947	3.26739	2.30768	1.11124	4.24274	3.74278	0.603198	3.20502	2.6558	-0.293534	-0.0642068	7.52164e-07	1.91418e-15	4.18815e-13	2.05018e-08	3.20123e-17	2.2884e-16	4.3074e-05	2.58557e-15	4.79873e-14	0.0154198	0.56114	7.86642	8.71537	11.1338	10.1741	7.80221	8.40541	11.0072	10.458	7.57289	8.68412	11.8156	11.3157
A_51_P156438	70556	Slc25a33	solute carrier family 25, member 33	0.195039	0.917342	2.30494	0.0268415	0.264713	1.51501	0.12492	0.927727	2.54373	0.540955	0.0286642	0.00719078	1.43716e-10	1.02103e-16	0.677079	0.000713818	7.0709e-14	0.0660023	1.21631e-10	2.17214e-17	2.47327e-07	0.656639	10.6844	10.8794	11.6017	12.9893	10.713	10.838	11.6408	13.2568	11.2253	11.2522	11.49	12.7403
A_55_P1975110	71701	Pnpt1	polyribonucleotide nucleotidyltransferase 1	0.734337	2.22985	2.30236	0.716392	2.25594	2.18151	0.510147	1.89544	1.558	-0.168122	0.17738	2.17409e-09	9.67629e-17	5.85684e-17	3.10068e-09	8.06255e-17	1.36451e-16	3.30626e-07	1.23116e-15	2.60391e-14	0.0141374	0.0103404	13.0548	13.7891	15.2846	15.3571	13.2322	13.7423	15.1276	14.7902	12.8867	13.6031	15.1426	15.0682
A_51_P422124	84652	Fam126a	family with sequence similarity 126, member A	0.191909	1.72022	2.30001	0.242908	1.57719	1.64469	0.190052	1.81586	1.72445	-0.175167	-0.0891924	0.00813009	1.03568e-14	1.10887e-16	0.00150535	3.98273e-14	2.08005e-14	0.00864035	4.46242e-15	9.96911e-15	0.0140275	0.179195	12.1881	12.38	13.9083	14.4881	12.0989	12.2889	13.9147	13.8233	12.0129	12.2558	13.5901	13.6576
A_55_P1959923	107869	Cth	cystathionase (cystathionine gamma-lyase)	0.375173	1.23287	2.29837	0.0171432	0.438031	1.14561	0.365158	1.57228	2.34343	1.44324	0.109711	0.00451884	9.43518e-09	9.36093e-13	0.881877	0.00141073	2.62994e-08	0.00543722	2.82943e-10	6.95317e-13	9.89699e-10	0.348363	9.04454	9.41971	10.2774	11.3429	9.15425	9.51941	10.7265	11.4977	10.4878	10.5049	10.9258	11.6334
A_55_P2107775	223672	Apol9a	apolipoprotein L 9a	0.626361	2.15713	2.29317	0.702974	2.06191	2.22131	0.442359	2.257	2.63381	-0.316887	-0.16293	6.98396e-06	1.77838e-13	6.91985e-14	1.72051e-06	3.56223e-13	1.13156e-13	0.000286682	8.84689e-14	8.07778e-15	0.00443409	0.107937	10.8963	11.5227	13.0534	13.1895	10.7334	11.1757	12.9904	13.3672	10.5794	11.2824	12.6413	12.8007
A_55_P2017491	71684	Rbm43	RNA binding motif protein 43	0.551322	2.65004	2.29119	0.631854	2.49066	1.99831	0.45203	2.51648	2.0876	-0.138949	-0.00731774	0.000513711	5.86304e-13	5.39562e-12	0.0001407	1.51474e-12	4.23602e-11	0.00263958	1.29393e-12	2.19928e-11	0.290116	0.954757	11.8592	12.4106	14.5093	14.1504	11.8519	12.304	14.3684	13.9395	11.7203	12.3521	14.2109	13.7186
A_55_P2072115	100382	AW011738	expressed sequence AW011738	0.882001	2.57846	2.28935	1.00448	2.62894	2.16808	0.810565	2.48877	2.17748	-0.310008	-0.0107764	5.25263e-08	6.06756e-15	3.8459e-14	8.63132e-09	4.48642e-15	8.92492e-14	1.64186e-07	1.05242e-14	8.34737e-14	0.00391628	0.908138	8.91195	9.79395	11.4904	11.2013	8.90117	9.71173	11.3899	11.0787	8.60194	9.60642	11.2309	10.77
A_51_P370640	213436	Zcchc5	zinc finger, CCHC domain containing 5	0.132316	1.74047	2.28786	0.016132	1.38323	2.00761	0.163542	1.91032	2.35406	-0.0723306	0.139466	0.587188	1.90977e-06	5.35635e-08	0.946976	2.84179e-05	3.08208e-07	0.503259	5.8791e-07	3.623e-08	0.765873	0.567354	8.09372	8.22604	9.83419	10.3816	8.23319	8.39673	10.1435	10.5873	8.02139	8.03752	9.40462	10.029
A_51_P217463	20310	Cxcl2	chemokine (C-X-C motif) ligand 2	0.488645	1.44041	2.28558	0.285911	0.955313	1.61685	0.358924	2.22184	3.00556	0.840268	0.663954	2.15129e-05	8.52009e-12	7.0484e-15	0.0031549	3.64312e-09	1.47129e-12	0.000492121	1.0942e-14	9.7611e-17	2.22177e-08	5.2517e-07	6.52828	7.01693	7.9687	8.81386	7.19224	7.55116	9.41408	10.1978	7.36855	7.65446	8.32386	8.9854
A_51_P211998	74442	Sgms2	sphingomyelin synthase 2	0.318967	2.02636	2.28015	0.113906	1.76107	1.70181	0.255037	2.22344	2.19393	-0.255335	-0.213749	0.000715495	1.40888e-14	2.24435e-15	0.154868	1.23694e-13	2.09654e-13	0.0041559	3.324e-15	4.09327e-15	0.00412201	0.0128403	9.23504	9.55401	11.2614	11.5152	9.02129	9.27633	11.2447	11.2152	8.97971	9.09361	10.7408	10.6815
A_55_P2114953	24110	Usp18	ubiquitin specific peptidase 18	0.806544	2.24565	2.27552	1.09756	2.806	2.66026	0.7755	2.36928	2.47971	-0.683494	-0.114655	4.12268e-08	9.83836e-15	8.01107e-15	5.17214e-10	3.04163e-16	7.00713e-16	7.04503e-08	4.27304e-15	2.1003e-15	3.78682e-07	0.184189	14.9219	15.7284	17.1675	17.1974	14.8072	15.5827	17.1765	17.2869	14.2384	15.3359	17.0444	16.8986
A_52_P646979	67102	D16Ertd472e	DNA segment, Chr 16, ERATO Doi 472, expressed	0.401431	2.71258	2.26799	0.30238	2.32309	1.68159	0.493932	2.91256	2.55597	0.420389	-0.103039	4.52661e-05	6.45911e-17	1.06576e-15	0.000717692	7.32383e-16	1.1126e-13	4.23447e-06	2.11351e-17	1.64154e-16	2.73564e-05	0.173577	9.66996	10.0714	12.3825	11.9379	9.56692	10.0608	12.4795	12.1229	10.0903	10.3927	12.4134	11.7719
A_51_P340829	212439	AA986860	expressed sequence AA986860	0.226988	1.18351	2.26302	0.121783	0.811131	1.42819	0.0558919	0.833294	1.82897	-0.0693889	0.164111	0.00683817	2.75217e-11	1.29453e-15	0.115161	6.90678e-09	1.59879e-12	0.455499	4.71103e-09	3.55629e-14	0.35649	0.0392942	8.43361	8.6606	9.61712	10.6966	8.59772	8.65361	9.43101	10.4267	8.36422	8.486	9.17535	9.79241
A_66_P105046	16173	Il18	interleukin 18	0.221772	2.35604	2.26154	0.466151	2.96051	2.84987	0.167439	2.23773	2.30377	-0.145388	0.0192017	0.103259	4.13263e-12	7.68719e-12	0.0022616	1.25051e-13	2.24915e-13	0.210427	9.02206e-12	5.80838e-12	0.273908	0.882901	9.50298	9.72475	11.859	11.7645	9.52218	9.68962	11.7599	11.826	9.35759	9.82374	12.3181	12.2075
A_51_P463846	229900	Gbp7	guanylate binding protein 7	0.970863	2.74739	2.24123	1.27954	3.33195	2.86046	1.30006	3.45291	2.38409	-0.506122	-0.0970614	4.38414e-06	1.9847e-12	4.30598e-11	1.29648e-07	1.02759e-13	1.07209e-12	1.04708e-07	5.92245e-14	1.70336e-11	0.00269523	0.505763	9.87625	10.8471	12.6236	12.1175	9.77919	11.0792	13.2321	12.1633	9.37013	10.6497	12.7021	12.2306
A_55_P2034705	64685	Nmi	N-myc (and STAT) interactor	0.456937	2.45444	2.23567	0.598379	2.46905	2.40352	0.423136	2.48186	2.26814	0.130669	-0.0283714	8.83508e-05	6.2999e-15	2.68639e-14	4.29194e-06	5.74397e-15	8.72922e-15	0.000191254	5.29945e-15	2.14811e-14	0.155873	0.750552	11.6005	12.0574	14.0549	13.8362	11.5721	11.9952	14.054	13.8402	11.7311	12.3295	14.2002	14.1347
A_55_P2034784	68108	9430008C03Rik	RIKEN cDNA 9430008C03 gene	0.533871	1.48981	2.2298	0.130875	0.937758	1.74827	0.660235	1.47069	2.16925	0.17364	-0.179033	3.13666e-07	9.88144e-14	1.85345e-16	0.0563586	1.11495e-10	8.27858e-15	1.76547e-08	1.2062e-13	2.85293e-16	0.0148829	0.0125042	10.0558	10.5896	11.5456	12.2856	9.87672	10.537	11.3474	12.046	10.2294	10.3603	11.1672	11.9777
A_51_P493987	59012	Moxd1	monooxygenase, DBH-like 1	-0.0899705	1.57023	2.22866	0.113604	1.28383	1.54178	-0.0937936	1.38029	1.76005	0.372948	-0.121885	0.424461	1.74893e-10	8.9249e-13	0.316109	3.28033e-09	2.29083e-10	0.405459	1.15546e-09	3.19707e-11	0.00371118	0.283277	8.06421	7.97424	9.63444	10.2929	7.94233	7.84854	9.32262	9.70238	8.43716	8.55077	9.72099	9.97895
A_52_P265965	28105	Trim36	tripartite motif-containing 36	0.176756	1.73785	2.22601	0.0172811	1.45011	1.70588	0.188983	1.86438	2.57666	0.112712	-0.00539762	0.0329737	1.34918e-13	2.89781e-15	0.822283	2.16657e-12	1.79629e-13	0.0239112	4.55454e-14	2.9465e-16	0.155989	0.944029	6.5836	6.76036	8.32145	8.80962	6.57821	6.76719	8.44258	9.15487	6.69632	6.7136	8.14642	8.40219
A_55_P2022074	21847	Klf10	Kruppel-like factor 10	0.48066	1.28833	2.22585	0.00692932	0.418663	1.27247	0.490988	1.43858	2.52166	0.0681063	-0.112572	9.38528e-06	1.19828e-11	2.66101e-15	0.92779	4.42244e-05	1.44446e-11	7.31468e-06	2.24877e-12	3.78759e-16	0.379012	0.154325	12.8634	13.3441	14.1518	15.0893	12.7509	13.2418	14.1894	15.2725	12.9315	12.9385	13.3502	14.204
A_66_P129710	212167	Gsap	gamma-secretase activating protein	0.579393	2.01947	2.22473	0.393704	1.83289	1.87043	0.405654	2.19384	2.35629	0.0171533	0.197516	5.72781e-07	6.44761e-15	1.42573e-15	5.53531e-05	2.90633e-14	2.12232e-14	4.01567e-05	1.77349e-15	5.80877e-16	0.815423	0.0148256	8.71653	9.29593	10.736	10.9413	8.91405	9.3197	11.1079	11.2703	8.73369	9.12739	10.5666	10.6041
A_55_P2130970	671535	Parp10	poly (ADP-ribose) polymerase family, member 10	0.963765	2.58764	2.22376	1.07579	2.85761	2.44476	0.804011	2.25046	2.16314	-0.550011	-0.0851005	2.2807e-06	1.95329e-12	1.94067e-11	5.6922e-07	4.27743e-13	4.6351e-12	1.94135e-05	1.62146e-11	2.93935e-11	0.000849052	0.5348	14.2996	15.2634	16.8873	16.5234	14.2145	15.0185	16.465	16.3777	13.7496	14.8254	16.6072	16.1944
A_55_P1959305	245945	Rbm47	RNA binding motif protein 47	0.297719	2.19134	2.21927	0.234973	2.04012	1.61468	0.251921	2.26951	2.23532	0.697229	-0.0432697	0.0617415	1.06502e-10	8.82303e-11	0.132363	3.06387e-10	8.93154e-09	0.108478	6.32165e-11	7.92588e-11	0.000242587	0.773961	8.42602	8.72374	10.6174	10.6453	8.38275	8.63468	10.6523	10.6181	9.12325	9.35823	11.1634	10.7379
A_55_P2041784	14674	Gna13	guanine nucleotide binding protein, alpha 13	0.299335	1.63391	2.21866	0.366769	1.60165	1.78425	0.25224	1.78185	2.54337	0.240023	-0.103764	0.00902124	2.66817e-11	2.53816e-13	0.00221467	3.59798e-11	7.07642e-12	0.0235007	7.22202e-12	3.07835e-14	0.0299402	0.318065	8.14153	8.44087	9.77544	10.3602	8.03777	8.29001	9.81962	10.5811	8.38155	8.74832	9.9832	10.1658
A_51_P505795	213233	Tapbpl	TAP binding protein-like	0.0484294	1.9912	2.21812	0.198454	2.44929	2.55656	-0.0221726	2.23902	2.31832	-0.150557	0.110077	0.484738	2.89806e-15	5.37133e-16	0.00984467	1.1369e-16	5.80281e-17	0.747535	4.6383e-16	2.68987e-16	0.0410185	0.12362	9.29984	9.34827	11.291	11.518	9.40991	9.38774	11.6489	11.7282	9.14928	9.34773	11.5986	11.7058
A_52_P317627	629303	Gm11435	predicted gene 11435	0.0300788	1.18747	2.20659	0.0748636	0.879018	1.54283	-0.133144	1.43725	2.12905	-0.113143	-0.0161844	0.717802	1.40058e-10	1.10624e-14	0.373535	1.08561e-08	2.73548e-12	0.123101	8.02161e-12	1.92813e-14	0.185547	0.84559	6.52147	6.55155	7.70893	8.72806	6.50528	6.37214	7.94254	8.63433	6.40832	6.48319	7.28734	7.95115
A_55_P1968718	240753	Plekha6	pleckstrin homology domain containing, family A member 6	-0.101612	1.4026	2.20382	-0.17617	0.866403	1.40576	-0.164932	1.49581	1.84876	-0.246455	-0.119979	0.12542	2.07672e-13	1.84064e-16	0.0127938	2.99988e-10	2.00588e-13	0.0184445	7.69668e-14	2.86901e-15	0.00122952	0.0743586	7.18624	7.08463	8.58884	9.39007	7.06627	6.90133	8.56207	8.91502	6.93979	6.76362	7.80619	8.34555
A_51_P345367	16913	Psmb8	proteasome (prosome, macropain) subunit, beta type 8 (large multifunctional peptidase 7)	0.227963	1.91914	2.20072	0.438842	2.51675	2.90974	0.316722	2.02331	2.0516	-0.601772	-0.0714422	0.00168451	8.70656e-16	1.02064e-16	1.99149e-06	1.24057e-17	1.26356e-18	8.27095e-05	3.80898e-16	3.06478e-16	3.1405e-08	0.254349	13.4755	13.7035	15.3947	15.6762	13.4041	13.7208	15.4274	15.4557	12.8738	13.3126	15.3905	15.7835
A_51_P389751	19698	Relb	avian reticuloendotheliosis viral (v-rel) oncogene related B	0.234978	1.32885	2.19967	0.139805	0.635789	1.50443	0.156113	1.26475	1.65344	0.0873797	0.00381434	0.000923722	1.35099e-13	5.24683e-17	0.0281373	8.00855e-09	1.98041e-14	0.0159376	2.89304e-13	4.56118e-15	0.150723	0.948271	12.9419	13.1769	14.2708	15.1416	12.9457	13.1019	14.2105	14.5992	13.0293	13.1691	13.6651	14.5337
A_55_P2100884	14221	Fjx1	four jointed box 1 (Drosophila)	0.0628955	0.854975	2.19473	-0.165589	0.225588	1.04793	0.0565856	1.26692	2.36105	0.153179	-0.0967243	0.539511	2.57313e-07	2.83717e-13	0.118391	0.0390636	1.62085e-08	0.580513	1.08528e-09	9.20315e-14	0.146383	0.349319	10.9857	11.0486	11.8407	13.1804	10.889	10.9455	12.1559	13.25	11.1389	10.9733	11.3644	12.1868
A_51_P363187	14825	Cxcl1	chemokine (C-X-C motif) ligand 1	0.379915	1.37626	2.19393	0.320191	0.793922	1.56779	0.132172	1.5716	2.31488	2.34239	1.13014	0.000140568	5.46923e-12	4.15755e-15	0.000698055	1.72725e-08	7.50409e-13	0.102752	7.23005e-13	1.8006e-15	1.4974e-15	1.05401e-10	10.7715	11.1514	12.1477	12.9654	11.9016	12.0338	13.4732	14.2165	13.1139	13.4341	13.9078	14.6817
A_55_P1981959	231712	Trafd1	TRAF type zinc finger domain containing 1	0.380636	2.18474	2.19388	0.449733	2.28851	2.01231	0.330008	2.00475	2.03487	-0.0081094	0.0159882	0.000115188	3.35912e-15	3.14762e-15	1.92851e-05	1.62882e-15	1.20758e-14	0.000454741	1.28024e-14	1.01541e-14	0.915228	0.833858	13.3312	13.7118	15.516	15.5251	13.3472	13.6772	15.352	15.3821	13.3231	13.7728	15.6116	15.3354
A_51_P367866	13653	Egr1	early growth response 1	0.75571	1.45288	2.19148	0.0357826	1.74502	1.3084	0.899922	2.35356	2.18198	-0.188764	-0.0414279	0.0275561	0.000264707	2.95294e-06	0.909977	4.09691e-05	0.000689236	0.0107471	1.21781e-06	3.11383e-06	0.553049	0.895857	14.1405	14.8962	15.5933	16.3319	14.099	14.999	16.4526	16.281	13.9517	13.9875	15.6967	15.2601
A_55_P2001159	66680	Oser1	oxidative stress responsive serine rich 1	0.0570503	1.14602	2.18814	0.00536442	0.753629	1.44844	0.113261	1.20102	2.23656	0.0427755	-0.023744	0.420137	1.86134e-11	8.81949e-16	0.93894	8.5753e-09	5.28846e-13	0.120022	9.17774e-12	6.26382e-16	0.543694	0.735017	13.0237	13.0807	14.1697	15.2118	12.9999	13.1132	14.201	15.2365	13.0664	13.0718	13.8201	14.5149
A_55_P1964752	22626	Slc23a3	solute carrier family 23 (nucleobase transporters), member 3	0.0776791	1.12789	2.18786	0.201284	1.1849	1.73166	0.106438	1.10818	2.09044	-0.289026	-0.0574386	0.495123	2.4635e-08	1.45757e-12	0.0893856	1.23887e-08	4.99917e-11	0.353035	3.1438e-08	2.91859e-12	0.0195156	0.612754	7.87179	7.94947	8.99968	10.0596	7.81435	7.92079	8.92252	9.90479	7.58276	7.78405	8.76766	9.31442
A_51_P324303	218203	Mylip	myosin regulatory light chain interacting protein	0.193075	1.3285	2.17539	-0.137964	0.776829	1.31387	0.147572	1.1936	1.54977	0.063903	0.420261	0.103731	2.63844e-09	1.72705e-12	0.235358	3.45913e-06	3.09243e-09	0.205768	1.20594e-08	2.8089e-10	0.575779	0.00174384	11.0517	11.2447	12.3802	13.2271	11.4719	11.6195	12.6655	13.0217	11.1156	10.9776	11.8924	12.4294
A_51_P277756	83770	Tas1r2	taste receptor, type 1, member 2	0.0828375	0.565864	2.16613	-0.0560113	0.357094	0.767524	0.0329221	0.539545	1.47382	0.327022	0.296365	0.366457	1.00257e-05	5.59612e-14	0.538539	0.00103136	2.24182e-07	0.716646	1.73203e-05	2.0106e-11	0.00209462	0.00431918	6.44592	6.52875	7.01178	8.61205	6.74228	6.7752	7.28182	8.2161	6.77294	6.71693	7.13003	7.54046
A_55_P1988975	60361	Ms4a4b	membrane-spanning 4-domains, subfamily A, member 4B	0.0684421	1.27975	2.16343	-0.031587	2.09579	2.96851	0.0262629	1.86873	2.51671	0.0419969	0.108949	0.52732	2.05785e-09	8.14509e-13	0.76936	1.32406e-12	6.13752e-15	0.807312	7.57452e-12	7.94742e-14	0.696959	0.318999	6.94604	7.01448	8.22579	9.10947	7.05499	7.08125	8.92371	9.5717	6.98803	6.95645	9.08382	9.95655
A_55_P2158741	18126	Nos2	nitric oxide synthase 2, inducible	0.343833	2.58455	2.15986	0.724171	3.66712	4.11466	0.371327	2.81865	2.70584	-0.914231	0.680745	0.00104941	2.06305e-15	3.36419e-14	3.01008e-07	8.56958e-18	1.39818e-18	0.000538946	5.32336e-16	1.00818e-15	1.26662e-08	6.71703e-07	12.29	12.6339	14.8746	14.4499	12.9708	13.3421	15.7894	15.6766	11.3758	12.1	15.0429	15.4905
A_51_P234253	228765	Sdcbp2	syndecan binding protein (syntenin) 2	0.703626	2.73699	2.15615	0.566854	2.7743	2.21557	0.60252	2.36273	1.84203	0.311446	-0.386649	9.94102e-07	2.28249e-15	9.26731e-14	1.35776e-05	1.84781e-15	6.08828e-14	6.66919e-06	2.24857e-14	1.04282e-12	0.00370737	0.000662897	10.1022	10.8058	12.8392	12.2583	9.71551	10.318	12.0782	11.5575	10.4136	10.9805	13.1879	12.6292
A_55_P2059154	209200	Dtx3l	deltex 3-like (Drosophila)	1.09757	2.4604	2.14946	1.15007	2.73389	2.41412	0.806837	2.6633	2.71798	-0.314442	0.128644	3.07599e-10	1.36502e-15	1.12024e-14	1.54387e-10	2.62562e-16	1.83608e-15	2.5169e-08	3.95469e-16	2.87697e-16	0.00117582	0.126234	11.9736	13.0712	14.434	14.1231	12.1022	12.9091	14.7655	14.8202	11.6592	12.8092	14.3931	14.0733
A_55_P2182452	326623	Tnfsf15	tumor necrosis factor (ligand) superfamily, member 15	0.0849332	1.08947	2.1469	-0.0226715	1.50786	1.75318	-0.0549687	1.71956	2.73166	0.888948	-0.256365	0.295769	2.77e-10	9.10564e-15	0.776616	2.11083e-12	2.09519e-13	0.494213	2.82245e-13	2.1183e-16	5.26676e-09	0.00492581	8.95535	9.04028	10.0448	11.1022	8.69899	8.64402	10.4185	11.4306	9.8443	9.82163	11.3522	11.5975
A_66_P117578	54384	Mtmr7	myotubularin related protein 7	0.139805	2.12082	2.14006	0.288008	1.91566	1.99895	0.259442	2.00734	1.18829	0.121059	-0.124735	0.702272	2.29962e-05	2.07842e-05	0.434477	6.92187e-05	4.40271e-05	0.480601	4.20809e-05	0.00448317	0.740495	0.732941	7.96593	8.10574	10.0868	10.106	7.8412	8.10064	9.84853	9.02949	8.08699	8.375	10.0027	10.0859
A_55_P2086279	665378	Gm7609	predicted pseudogene 7609	0.296747	2.09297	2.13667	0.173245	1.9475	2.59164	0.284545	2.09173	1.80073	-0.588028	-0.147695	0.00504425	1.37365e-13	9.98555e-14	0.0759509	4.16266e-13	5.00097e-15	0.00667371	1.38616e-13	1.3822e-12	8.45035e-06	0.125226	6.81832	7.11506	8.91128	8.95499	6.67062	6.95517	8.76236	8.47135	6.23029	6.40353	8.17778	8.82193
A_55_P2003517	243937	Zfp536	zinc finger protein 536	-0.0189324	2.23064	2.13002	0.162817	2.28212	1.37491	-0.152966	2.01962	1.31284	0.251133	0.210931	0.879151	4.72254e-12	9.50167e-12	0.202704	3.33921e-12	5.93673e-09	0.229987	2.11947e-11	1.13948e-08	0.057313	0.104598	6.53928	6.52035	8.76992	8.66929	6.75021	6.59724	8.76983	8.06305	6.79041	6.95323	9.07253	8.16532
A_52_P332788	620078	C130026I21Rik	RIKEN cDNA C130026I21 gene	0.133556	1.8399	2.12801	0.0232117	1.30564	1.62599	0.202886	2.76608	2.67579	-0.183783	-0.0370884	0.11294	1.2189e-13	1.28127e-14	0.774348	2.27857e-11	8.14959e-13	0.0215482	2.13881e-16	3.59646e-16	0.0347511	0.647566	6.66132	6.79487	8.50122	8.78933	6.62423	6.82711	9.39031	9.30002	6.47753	6.50075	7.78317	8.10352
A_55_P2067478	12563	Cdh6	cadherin 6	0.0789135	1.56069	2.12509	0.0739106	1.21914	1.01439	0.138439	1.41864	1.94707	0.20851	-0.0526406	0.58892	8.85217e-09	1.00445e-10	0.612552	2.58587e-07	2.68816e-06	0.347742	3.34897e-08	3.65695e-10	0.164511	0.717779	6.89035	6.96927	8.45104	9.01544	6.83771	6.97615	8.25635	8.78478	7.09886	7.17277	8.318	8.11325
A_52_P467389	65221	Slc15a3	solute carrier family 15, member 3	0.103615	1.66496	2.12401	0.143904	1.54971	2.213	0.141383	2.25325	3.05391	2.4655	-0.0805293	0.286411	7.07432e-12	1.71078e-13	0.145196	2.08823e-11	9.0819e-14	0.151906	6.87424e-14	6.065e-16	1.70426e-14	0.404005	7.21352	7.31714	8.87848	9.33753	7.13299	7.27438	9.38624	10.1869	9.67902	9.82292	11.2287	11.892
A_51_P245368	18669	Abcb1b	ATP-binding cassette, sub-family B (MDR/TAP), member 1B	0.186503	1.08552	2.11616	0.289327	0.910666	1.36033	0.226686	1.21262	2.19448	0.43936	-0.187782	0.00921086	1.06774e-11	3.5794e-16	0.00030353	1.47827e-10	3.42209e-13	0.00241624	1.98884e-12	2.02596e-16	3.24435e-06	0.00883016	11.1132	11.2997	12.1988	13.2294	10.9255	11.1521	12.1381	13.1199	11.5526	11.8419	12.4633	12.9129
A_55_P2009988	228775	Trib3	tribbles homolog 3 (Drosophila)	0.772437	1.72655	2.11604	0.191107	0.420902	0.89787	0.690683	1.42327	2.15045	1.34474	-0.072494	5.71147e-07	5.98259e-12	2.67426e-13	0.0648465	0.000485714	7.7995e-08	2.34248e-06	1.08669e-10	2.08623e-13	2.51575e-10	0.462726	12.5974	13.3698	14.3239	14.7134	12.5249	13.2156	13.9481	14.6753	13.9421	14.1332	14.363	14.84
A_55_P1957459	14728	Lilrb4	leukocyte immunoglobulin-like receptor, subfamily B, member 4	0.19362	0.950199	2.11462	0.0384156	0.170924	0.476396	0.0621931	1.35686	2.54355	3.94089	-0.203266	0.14355	1.22702e-06	1.58206e-11	0.764093	0.193323	0.00164111	0.627871	1.04085e-08	9.56965e-13	1.08785e-15	0.125912	8.04593	8.23955	8.99613	10.1606	7.84267	7.90486	9.19953	10.3862	11.9868	12.0252	12.1577	12.4632
A_51_P518600	68775	Atp6v1c2	ATPase, H+ transporting, lysosomal V1 subunit C2	0.229821	0.965907	2.11133	0.0278713	0.655391	1.43813	0.156486	0.913357	1.30553	0.0684969	-0.0569856	0.0350444	4.6182e-08	4.70729e-13	0.783467	6.70303e-06	1.5551e-10	0.136304	9.87574e-08	6.44583e-10	0.502051	0.575682	6.19717	6.42699	7.16308	8.3085	6.14019	6.29667	7.05354	7.44572	6.26567	6.29354	6.92106	7.7038
A_52_P507382	54445	Unc93b1	unc-93 homolog B1 (C. elegans)	0.140142	1.73964	2.11097	0.213035	2.06	2.47364	0.191005	1.67464	1.75159	-0.00281969	-0.0597782	0.0427339	9.01941e-15	4.40815e-16	0.00411802	6.461e-16	3.67055e-17	0.00849774	1.62988e-14	8.10901e-15	0.965198	0.361458	11.356	11.4961	13.0956	13.4669	11.2962	11.4872	12.9708	13.0478	11.3531	11.5662	13.4131	13.8268
A_55_P2084980	245403	Dcaf12l2	DDB1 and CUL4 associated factor 12-like 2	0.488177	2.77347	2.11044	0.591738	2.57458	2.0667	0.33941	2.99183	2.97984	0.034287	0.149263	0.00632997	6.31006e-12	3.7308e-10	0.00155904	1.94077e-11	5.07103e-10	0.0441837	1.99398e-12	2.11991e-12	0.828062	0.350858	8.11746	8.60564	10.8909	10.2279	8.26672	8.60613	11.2586	11.2466	8.15175	8.74349	10.7263	10.2184
A_52_P495869	16658	Mafb	v-maf musculoaponeurotic fibrosarcoma oncogene family, protein B (avian)	-0.0143054	2.18577	2.09847	0.0805815	2.42117	2.09125	-0.159001	1.69039	1.56967	-0.104484	0.310259	0.89858	1.3264e-12	2.47006e-12	0.47631	2.76456e-13	2.60309e-12	0.169453	6.4422e-11	1.9347e-10	0.358371	0.0126876	7.52598	7.51167	9.71174	9.62444	7.83623	7.67723	9.52662	9.40591	7.42149	7.50207	9.84266	9.51274
A_51_P214747	243771	Parp12	poly (ADP-ribose) polymerase family, member 12	0.592852	2.21988	2.09476	0.577685	2.32284	2.04026	0.537654	2.51224	2.09591	0.105366	0.151397	4.87395e-06	3.05946e-14	7.50898e-14	6.63681e-06	1.51426e-14	1.12823e-13	1.52891e-05	4.47445e-15	7.44599e-14	0.24783	0.104147	11.1192	11.712	13.3391	13.2139	11.2706	11.8082	13.7828	13.3665	11.2245	11.8022	13.5474	13.2648
A_66_P128537	100038882	Isg15	ISG15 ubiquitin-like modifier	0.59297	1.88649	2.08583	0.666899	1.99208	2.22012	0.491845	2.19309	2.28641	-0.418081	0.204909	2.31717e-08	6.41362e-16	1.33045e-16	4.43907e-09	2.73496e-16	4.99892e-17	2.90273e-07	6.05876e-17	3.14926e-17	2.30292e-06	0.00287916	13.8445	14.4374	15.7309	15.9303	14.0494	14.5412	16.2424	16.3358	13.4264	14.0933	15.4185	15.6465
A_66_P138137	18950	Pnp	purine-nucleoside phosphorylase	0.499227	2.38105	2.08534	0.52318	2.64815	2.26598	0.47548	2.45734	1.76094	-0.12769	-0.0250267	2.43415e-07	1.70535e-17	1.36763e-16	1.30547e-07	3.20135e-18	3.71381e-17	4.60574e-07	1.03856e-17	1.92602e-15	0.0438578	0.673585	15.2195	15.7187	17.6005	17.3048	15.1944	15.6699	17.6518	16.9554	15.0918	15.615	17.7399	17.3578
A_51_P520966	50723	Icosl	icos ligand	0.179676	0.760481	2.08435	0.198028	0.802465	2.29715	0.288407	1.52746	3.30282	0.621495	0.481626	0.0867135	9.14993e-07	4.67087e-13	0.0614496	4.58794e-07	1.04585e-13	0.00985501	5.20344e-11	3.68205e-16	1.06764e-05	0.000165867	7.39761	7.57729	8.15809	9.48197	7.87924	8.16765	9.4067	11.1821	8.01911	8.21714	8.82157	10.3163
A_51_P487690	99899	Ifi44	interferon-induced protein 44	0.783329	1.78523	2.08208	0.817706	2.26668	2.46158	0.583569	2.0294	2.35019	-0.463513	0.136257	8.06656e-08	4.65082e-13	4.34006e-14	4.49398e-08	1.16206e-14	3.21859e-15	3.57345e-06	6.45209e-14	6.62065e-15	4.98194e-05	0.125519	13.406	14.1893	15.1912	15.4881	13.5423	14.1258	15.5717	15.8925	12.9425	13.7602	15.2092	15.4041
A_51_P367060	15982	Ifrd1	interferon-related developmental regulator 1	0.283425	1.08696	2.0814	0.0628346	0.703822	1.53945	0.31827	1.5498	2.16815	0.137228	-0.0661941	0.000307896	7.8408e-12	3.44024e-16	0.324056	4.74135e-09	3.7787e-14	9.84757e-05	3.4064e-14	1.81481e-16	0.0411265	0.299674	13.8353	14.1187	14.9222	15.9167	13.7691	14.0873	15.3189	15.9372	13.9725	14.0353	14.6763	15.512
A_55_P2156855	71934	Car13	carbonic anhydrase 13	0.131842	1.79589	2.08118	0.184605	1.58856	1.71439	0.0573467	1.75535	1.94198	0.0542515	-0.00733121	0.0373427	1.30882e-15	1.30278e-16	0.00584716	8.85485e-15	2.70183e-15	0.3378	1.86928e-15	3.85347e-16	0.363783	0.901038	11.1379	11.2697	12.9338	13.2191	11.1306	11.1879	12.8859	13.0726	11.1922	11.3768	12.7807	12.9065
A_55_P1971458	16452	Jak2	Janus kinase 2	0.200951	1.89328	2.0783	0.141168	1.73694	1.66117	0.173462	1.88035	2.06506	0.161765	0.0281831	0.12375	6.37119e-11	1.57471e-11	0.270427	2.28746e-10	4.40687e-10	0.179838	7.05625e-11	1.73378e-11	0.209332	0.822576	11.8045	12.0054	13.6978	13.8828	11.8327	12.0061	13.713	13.8977	11.9662	12.1074	13.7032	13.6274
A_52_P111031	219228	Pcdh17	protocadherin 17	0.348003	2.54949	2.07668	0.568156	3.01759	2.59022	0.476251	2.82544	2.23938	0.149718	-0.101106	0.000757493	1.69573e-15	4.11769e-14	4.59239e-06	1.21317e-16	1.32403e-15	3.48323e-05	3.40119e-16	1.2781e-14	0.0929299	0.245009	6.76072	7.10872	9.31021	8.8374	6.65961	7.13586	9.48505	8.89899	6.91044	7.47859	9.92803	9.50065
A_51_P279606	12703	Socs1	suppressor of cytokine signaling 1	1.422	3.53665	2.07504	1.38702	3.5477	2.56349	1.31976	3.84858	2.48209	-0.0222649	0.226219	7.3263e-10	6.79816e-16	2.59192e-12	1.05238e-09	6.4745e-16	1.01242e-13	2.15804e-09	1.81036e-16	1.66543e-13	0.841559	0.0557093	10.9576	12.3796	14.4942	13.0326	11.1838	12.5036	15.0324	13.6659	10.9353	12.3223	14.483	13.4988
A_51_P436652	20306	Ccl7	chemokine (C-C motif) ligand 7	0.473945	1.78016	2.07401	0.416509	1.5993	1.72552	0.425259	1.67404	1.79788	0.297846	0.306291	2.97945e-06	1.55169e-14	1.43717e-15	1.37621e-05	8.15761e-14	2.51692e-14	1.08308e-05	4.02454e-14	1.33043e-14	0.000438876	0.000339086	16.2526	16.7265	18.0328	18.3266	16.5589	16.9842	18.2329	18.3568	16.5505	16.967	18.1497	18.276
A_55_P2035504	107569	Nt5c3	5'-nucleotidase, cytosolic III	0.117815	2.11586	2.07317	0.27238	2.61921	2.30024	0.178388	2.32493	2.03224	0.179487	0.0938741	0.102601	1.20777e-15	1.66042e-15	0.00103694	4.26786e-17	3.26988e-16	0.0185507	2.76648e-16	2.26655e-15	0.0179517	0.186621	11.5471	11.6649	13.663	13.6203	11.641	11.8194	13.9659	13.6732	11.7266	11.999	14.3458	14.0269
A_55_P2088033	628693	Gm6904	predicted gene 6904	0.238051	2.27674	2.06931	0.121451	2.86874	2.82566	0.0475119	1.89549	1.87691	0.208289	0.0966773	0.00526159	1.33589e-15	5.92432e-15	0.118811	3.57609e-17	4.53534e-17	0.528091	2.31602e-14	2.69831e-14	0.0121977	0.207985	6.28954	6.52759	8.56629	8.35886	6.38622	6.43373	8.28171	8.26313	6.49783	6.61928	9.36657	9.32349
A_66_P110633	71898	Apol9b	apolipoprotein L 9b	0.462053	1.84716	2.0671	0.656726	2.05954	2.12018	0.464652	1.99846	2.14091	-0.285647	-0.160927	9.38952e-07	1.38838e-15	2.38971e-16	8.25207e-09	2.53082e-16	1.60624e-16	8.74303e-07	4.05488e-16	1.37908e-16	0.000214269	0.0163056	14.7734	15.2355	16.6206	16.8405	14.6125	15.0771	16.6109	16.7534	14.4878	15.1445	16.5473	16.6079
A_66_P101942	677168	Gm9706	predicted gene 9706	0.447292	1.9072	2.06198	0.647092	2.16067	2.29871	0.542713	2.4591	2.43239	-0.401953	0.0468705	0.000170975	6.15068e-13	1.85379e-13	2.83419e-06	9.01316e-14	3.45786e-14	2.23017e-05	1.21431e-14	1.43881e-14	0.000470079	0.616144	13.2316	13.6789	15.1388	15.2936	13.2785	13.8212	15.7376	15.7109	12.8297	13.4768	14.9903	15.1284
A_55_P2125613	245884	Fam71f2	family with sequence similarity 71, member F2	-0.132792	0.334917	2.06135	0.0423397	0.128433	1.36443	0.0468527	0.278399	2.30315	-0.111331	-0.0607483	0.177568	0.00264929	2.79809e-13	0.658889	0.191412	1.43981e-10	0.625438	0.00932093	5.05392e-14	0.254263	0.527849	7.82084	7.68805	8.15576	9.8822	7.7601	7.80695	8.03849	10.0632	7.70951	7.75185	7.83795	9.07395
A_55_P2030428	93759	Sirt1	sirtuin 1	0.162132	1.13029	2.05836	-0.0172748	0.737388	1.19002	0.0426704	1.11299	1.64359	0.305987	0.128419	0.0392341	4.54759e-11	4.67321e-15	0.813851	2.20641e-08	2.10122e-11	0.562602	5.72628e-11	1.52936e-13	0.000634377	0.0942751	10.5832	10.7453	11.7134	12.6415	10.7116	10.7542	11.8246	12.3552	10.8891	10.8719	11.6265	12.0792
A_55_P2106175	14528	Gch1	GTP cyclohydrolase 1	0.304633	1.47904	2.0492	0.403472	1.60499	1.94139	0.217216	1.38406	2.34632	0.237191	-0.18015	0.00216394	6.96625e-12	4.70536e-14	0.000185135	2.01201e-12	1.08497e-13	0.0192041	1.89724e-11	5.75091e-15	0.0117618	0.0463145	12.546	12.8506	14.025	14.5952	12.3659	12.5831	13.7499	14.7122	12.7832	13.1867	14.3882	14.7246
A_66_P118989	666892	Gm8350	predicted gene 8350	0.0577243	0.763336	2.04529	0.150465	0.266576	1.36271	0.0362889	0.682165	2.25377	-0.251439	-0.079054	0.553626	5.86236e-07	3.8782e-13	0.134426	0.0130628	1.78888e-10	0.708661	2.41811e-06	8.69339e-14	0.0180691	0.419522	8.95629	9.01402	9.71963	11.0016	8.87724	8.91353	9.5594	11.131	8.70485	8.85532	8.97143	10.0676
A_51_P208121	207952	Klhl25	kelch-like 25	0.165439	1.72602	2.04365	0.0896539	1.0485	1.37221	0.246478	1.45339	2.00254	0.204053	-0.264527	0.289178	4.50736e-09	3.91523e-10	0.56071	3.43121e-06	1.08515e-07	0.121992	4.97651e-08	5.27214e-10	0.195161	0.0988284	10.2522	10.4176	11.9782	12.2958	9.98765	10.2341	11.441	11.9902	10.4562	10.5459	11.5047	11.8284
A_51_P502456	630499	H2-K2	histocompatibility 2, K region locus 2	0.110225	1.38799	2.04088	0.12672	1.72584	2.37365	0.235367	1.55778	1.9836	-0.641522	0.0548356	0.264102	1.32535e-10	3.89445e-13	0.202001	5.03995e-12	3.78791e-14	0.0251457	2.36752e-11	6.02813e-13	4.98388e-06	0.572717	14.4422	14.5524	15.8302	16.483	14.497	14.7324	16.0548	16.4806	13.8006	13.9274	15.5265	16.1743
A_55_P2084122	71916	Dus4l	dihydrouridine synthase 4-like (S. cerevisiae)	0.606987	1.16075	2.04002	0.182087	0.155761	0.632264	0.159556	0.251983	0.778019	1.00396	0.917929	0.000163428	7.21397e-08	2.13296e-11	0.160951	0.226594	0.00010852	0.215999	0.0589027	1.13412e-05	4.94771e-07	1.54748e-06	8.84222	9.44921	10.003	10.8822	9.76015	9.91971	10.0121	10.5382	9.84618	10.0283	10.0019	10.4784
A_51_P342773	22355	Vipr2	vasoactive intestinal peptide receptor 2	0.186174	1.2703	2.03929	0.108135	0.566481	1.10103	0.0697176	1.11671	1.67577	0.177697	0.069651	0.0288651	2.29507e-11	1.63321e-14	0.182027	1.83893e-06	1.93375e-10	0.38165	1.56889e-10	3.39314e-13	0.0358215	0.382094	6.99768	7.18385	8.26797	9.03697	7.06733	7.13705	8.18404	8.7431	7.17537	7.28351	7.74185	8.2764
A_51_P521374	67725	Nudt13	nudix (nucleoside diphosphate linked moiety X)-type motif 13	0.459403	2.60226	2.03764	0.617668	2.42948	1.96139	0.453263	2.3428	2.06903	-0.102345	0.0154751	0.00261712	9.75434e-13	3.96301e-11	0.000204143	2.78327e-12	7.00457e-11	0.00289306	4.83442e-12	3.15177e-11	0.438868	0.905937	11.0432	11.5026	13.6454	13.0808	11.0586	11.5119	13.4014	13.1277	10.9408	11.5585	13.3703	12.9022
A_51_P497985	12263	C2	complement component 2 (within H-2S)	0.178772	1.59861	2.03328	0.292877	2.86108	3.36165	-0.0170881	1.37614	1.8563	0.0161951	0.0137557	0.0813343	1.83089e-11	4.71911e-13	0.00770934	2.38059e-15	1.91351e-16	0.86104	1.71359e-10	1.90112e-12	0.868227	0.887919	8.80414	8.98292	10.4028	10.8374	8.8179	8.80081	10.194	10.6742	8.82034	9.11322	11.6814	12.182
A_55_P2032081	13170	Dbp	D site albumin promoter binding protein	-0.40947	0.300626	2.02898	-0.0552487	-0.0181187	1.94384	-0.45995	-0.0269676	1.42672	-0.722686	-0.047469	3.05929e-05	0.0006555	4.70408e-15	0.448901	0.802273	9.16683e-15	8.15547e-06	0.709713	1.08447e-12	2.40409e-08	0.514281	11.9673	11.5578	12.2679	13.9963	11.9198	11.4599	11.8929	13.3466	11.2446	11.1894	11.2265	13.1885
A_55_P1961499	17067	Ly6c1	lymphocyte antigen 6 complex, locus C1	-0.161985	1.07684	2.02827	0.0126612	1.81694	2.96184	-0.0445646	1.17007	1.66675	-1.05801	-0.103778	0.0945874	2.83162e-09	2.17788e-13	0.891224	1.17822e-12	6.08036e-16	0.631438	8.53524e-10	4.38624e-12	3.64447e-09	0.27159	10.827	10.665	11.9038	12.8552	10.7232	10.6786	11.8933	12.39	9.76897	9.78163	11.5859	12.7308
A_51_P265219	243382	Ppm1k	protein phosphatase 1K (PP2C domain containing)	1.04991	3.11166	2.02749	0.926797	3.07258	1.89229	0.953216	3.05124	1.65778	-0.00489804	0.340903	2.57856e-08	2.18882e-15	1.64117e-12	1.40884e-07	2.66573e-15	4.69161e-12	9.65952e-08	2.97179e-15	3.4521e-11	0.962987	0.00474698	8.40812	9.45803	11.5198	10.4356	8.74902	9.70224	11.8003	10.4068	8.40322	9.33002	11.4758	10.2955
A_55_P1991811	432555	Gm5431	predicted gene 5431	0.448944	2.70969	2.02524	0.518597	3.66008	3.284	0.485956	2.75108	2.19573	0.132885	0.0735527	0.00103349	6.06989e-14	5.26674e-12	0.000285111	5.63979e-16	3.06621e-15	0.000519407	4.80099e-14	1.53934e-12	0.253091	0.520946	7.62118	8.07012	10.3309	9.64642	7.69473	8.18069	10.4458	9.89046	7.75407	8.27266	11.4141	11.0381
A_52_P466090	56045	Samhd1	SAM domain and HD domain, 1	0.131804	2.11633	2.0216	0.306512	2.73982	2.43008	0.259371	2.48508	1.95993	-0.0411388	0.00301937	0.0643369	8.08004e-16	1.65225e-15	0.000287994	1.40915e-17	9.27315e-17	0.0012594	6.52719e-17	2.67916e-15	0.543711	0.964241	11.8546	11.9864	13.9709	13.8762	11.8576	12.1169	14.3427	13.8175	11.8134	12.1199	14.5532	14.2435
A_55_P2010788	14664	Slc6a9	solute carrier family 6 (neurotransmitter transporter, glycine), member 9	0.301006	1.17435	2.02034	0.110416	0.264474	0.914947	0.23654	1.00859	2.15018	1.23606	0.203445	0.00019566	2.94834e-12	6.7041e-16	0.0966978	0.000649858	1.25749e-10	0.00165449	2.93947e-11	2.52929e-16	1.35031e-12	0.00503375	11.6702	11.9713	12.8446	13.6906	11.8737	12.1102	12.8823	14.0239	12.9063	13.0167	13.1708	13.8213
A_52_P195018	106952	Arap3	ArfGAP with RhoGAP domain, ankyrin repeat and PH domain 3	0.156175	1.95027	2.01543	0.0605239	1.44439	1.14817	0.182633	1.58253	1.99365	0.523983	-0.111247	0.309358	6.28829e-10	3.88747e-10	0.689448	4.4496e-08	9.27361e-07	0.237309	1.25409e-08	4.55869e-10	0.00285199	0.465354	7.74904	7.90522	9.69931	9.76447	7.6378	7.82043	9.22032	9.63144	8.27303	8.33355	9.71742	9.42119
A_55_P2291776	78902	4833447P13Rik	RIKEN cDNA 4833447P13 gene	0.0878308	1.16246	1.9976	-0.110238	0.528565	0.934349	0.0506337	1.28116	1.5473	0.403724	0.0986329	0.605761	3.31554e-06	2.34189e-09	0.518135	0.00600447	4.1027e-05	0.765395	9.9005e-07	8.3165e-08	0.0278755	0.562613	7.89425	7.98208	9.05671	9.89185	7.99288	8.04351	9.27404	9.54018	8.29797	8.18773	8.82654	9.23232
A_55_P2006494	328561	Apol10b	apolipoprotein L 10B	0.261369	2.52599	1.99746	0.10104	2.59914	1.7767	0.173677	2.65114	2.18615	0.435455	-0.197668	0.00961137	4.88754e-15	1.85737e-13	0.272094	3.1327e-15	1.1211e-12	0.0683404	2.30012e-15	4.6078e-14	0.000162985	0.0408753	7.04689	7.30826	9.57288	9.04436	6.84923	7.0229	9.50037	9.03538	7.48235	7.58339	10.0815	9.25905
A_55_P2011026	63872	Zfp296	zinc finger protein 296	0.325639	2.37503	1.99104	0.616343	2.72675	2.4423	0.542479	2.37851	2.15119	-0.938712	-0.379101	0.00011893	8.32332e-17	1.31612e-15	5.38592e-08	9.50774e-18	5.36987e-17	2.97812e-07	8.13468e-17	3.92643e-16	1.313e-10	2.3585e-05	10.7893	11.1149	13.1643	12.7803	10.4102	10.9527	12.7887	12.5614	9.85058	10.4669	12.5773	12.2929
A_51_P134030	231699	Oas1e	2'-5' oligoadenylate synthetase 1E	0.380924	2.3186	1.9887	0.386657	2.37288	2.07908	0.419105	2.62835	2.16743	-0.548464	-0.21045	0.000400206	9.9953e-15	1.07777e-13	0.000348536	6.974e-15	5.42316e-14	0.00016071	1.41668e-15	2.84664e-14	8.73517e-06	0.0254679	8.06713	8.44806	10.3857	10.0558	7.85668	8.27579	10.485	10.0241	7.51867	7.90533	9.89155	9.59775
A_55_P2112424	228355	Madd	MAP-kinase activating death domain	0.433608	2.15012	1.98561	0.294945	1.78582	1.50799	0.152599	1.8941	2.10878	0.106223	0.339418	0.000106713	2.90383e-14	9.94919e-14	0.00313099	5.09051e-13	6.70996e-12	0.0908959	2.05957e-13	3.92306e-14	0.228354	0.00103989	13.6182	14.0518	15.7683	15.6038	13.9576	14.1102	15.8517	16.0664	13.7244	14.0194	15.5102	15.2324
A_55_P2045622	239122	Setdb2	SET domain, bifurcated 2	0.607759	2.70884	1.98515	0.640596	2.73893	1.97708	0.503945	2.93504	2.047	0.212904	0.0252481	9.06685e-06	4.61143e-15	5.64718e-13	4.86397e-06	3.88244e-15	6.01124e-13	7.22701e-05	1.32011e-15	3.526e-13	0.0394616	0.793575	10.0927	10.7004	12.8015	12.0778	10.1179	10.6219	13.053	12.1649	10.3056	10.9462	13.0445	12.2827
A_55_P2027812	76976	Arxes2	adipocyte-related X-chromosome expressed sequence 2	-0.130243	1.27187	1.98369	-0.151771	0.90159	1.62052	-0.183368	1.25625	1.69326	-0.404464	0.171272	0.0565642	1.0581e-12	1.08688e-15	0.0292385	1.88393e-10	2.53155e-14	0.0106125	1.27813e-12	1.28057e-14	9.3904e-06	0.0157181	11.5179	11.3876	12.7898	13.5016	11.6892	11.5058	12.9454	13.3824	11.1134	10.9616	12.015	12.7339
A_51_P309988	70355	Gprc5c	G protein-coupled receptor, family C, group 5, member C	0.06015	1.7444	1.98354	-0.194593	1.29875	1.29871	-0.0557833	1.43439	1.56364	0.0504832	0.0138656	0.662194	7.90036e-10	1.19503e-10	0.169239	5.12928e-08	5.13167e-08	0.685225	1.29675e-08	3.82635e-09	0.713614	0.919547	7.6973	7.75745	9.4417	9.68084	7.71116	7.65538	9.14555	9.27481	7.74778	7.55319	9.04653	9.04649
A_55_P1962344	20821	Trim21	tripartite motif-containing 21	1.48101	3.12987	1.9827	1.64968	2.97006	2.30346	1.34637	3.16727	1.94567	-0.248055	0.106645	9.92439e-13	8.68081e-18	1.10036e-14	1.89456e-13	1.97904e-17	1.06323e-15	4.24335e-12	7.2011e-18	1.47486e-14	0.00387459	0.165931	11.0803	12.5613	14.2101	13.063	11.1869	12.5333	14.3542	13.1326	10.8322	12.4819	13.8023	13.1357
A_55_P1998115	16621	Klkb1	kallikrein B, plasma 1	0.24889	1.85496	1.98125	0.299342	1.7668	1.51875	0.236343	1.61203	1.55809	-0.278134	-0.0693732	0.00977799	2.85425e-13	1.03446e-13	0.00281406	6.02912e-13	6.05421e-12	0.0132709	2.4477e-12	4.1074e-12	0.00476027	0.425435	7.11877	7.36766	8.97372	9.10001	7.04939	7.28574	8.66142	8.60748	6.84063	7.13997	8.60743	8.35938
A_51_P331059	104271	Tex15	testis expressed gene 15	-0.245758	0.100514	1.97687	-0.0973801	0.104808	1.66238	0.0252459	0.28947	1.40574	-0.166116	-0.21497	0.0302371	0.345042	2.20317e-12	0.359874	0.325421	3.02779e-11	0.810018	0.0128467	3.64991e-10	0.127457	0.0539548	7.4882	7.24244	7.58871	9.46507	7.27323	7.29848	7.5627	8.67897	7.32208	7.2247	7.42689	8.98446
A_52_P987201	239618	Pdzrn4	PDZ domain containing RING finger 4	-0.075498	0.942111	1.97642	-0.0605839	0.528072	1.41799	-0.126967	0.907262	1.41054	0.0342039	-0.0407999	0.381221	5.80255e-09	8.97813e-14	0.480342	1.10066e-05	1.43368e-11	0.149512	9.88454e-09	1.55218e-11	0.688687	0.633095	6.49042	6.41492	7.43253	8.46684	6.44962	6.32265	7.35688	7.86016	6.52463	6.46404	7.0527	7.94262
A_55_P2258832	100502767	5230400M03Rik	RIKEN cDNA 5230400M03 gene	0.952258	2.05219	1.9734	0.735115	2.27883	1.64505	0.540751	2.23416	1.89257	0.0380218	0.23942	8.89296e-07	1.75023e-11	3.15176e-11	1.99532e-05	3.58759e-12	4.68124e-10	0.000457051	4.84591e-12	5.89148e-11	0.761119	0.0693834	10.1486	11.1009	12.2008	12.122	10.388	10.9288	12.6222	12.2806	10.1866	10.9217	12.4655	11.8317
A_51_P210956	22329	Vcam1	vascular cell adhesion molecule 1	0.366812	2.36823	1.97073	0.261778	1.88622	1.83237	0.412345	2.34257	2.34959	0.67996	0.217146	0.0306471	6.34533e-11	9.50443e-10	0.109931	1.79242e-09	2.71841e-09	0.0169547	7.46397e-11	7.13841e-11	0.000457496	0.179406	13.6549	14.0217	16.0232	15.6257	13.8721	14.2844	16.2146	16.2217	14.3349	14.5967	16.2211	16.1673
A_55_P2042993	65103	Arl6ip6	ADP-ribosylation factor-like 6 interacting protein 6	0.461381	2.14179	1.96784	0.119478	1.81459	1.49034	0.246839	2.05233	2.25158	0.148498	0.287843	0.000186532	1.90895e-13	7.01499e-13	0.228524	2.42098e-12	4.72876e-11	0.0199284	3.68042e-13	8.82925e-14	0.139249	0.00823643	13.4992	13.9606	15.641	15.4671	13.7871	14.0339	15.8394	16.0387	13.6477	13.7672	15.4623	15.1381
A_51_P275976	13448	Dok1	docking protein 1	0.387688	1.81094	1.96738	0.247006	1.32472	1.22941	0.556051	2.2126	1.97436	0.107225	-0.234865	7.90233e-05	4.66189e-14	1.2898e-14	0.00406272	5.63365e-12	1.74083e-11	1.2242e-06	2.07124e-15	1.22082e-14	0.164755	0.00574203	13.0616	13.4493	14.8725	15.029	12.8267	13.3828	15.0393	14.8011	13.1688	13.4158	14.4935	14.3982
A_52_P206861	245671	Klf8	Kruppel-like factor 8	-0.0329147	1.45428	1.96582	-0.0278291	1.43463	1.5717	-0.0312348	1.79111	2.00534	0.132052	-0.250707	0.596267	7.34471e-14	6.7598e-16	0.653792	9.06255e-14	2.20705e-14	0.61499	2.89128e-15	4.95132e-16	0.045634	0.000819159	8.3876	8.35468	9.84188	10.3534	8.13689	8.10566	9.928	10.1422	8.51965	8.49182	9.95428	10.0913
A_52_P654703	70928	Trim69	tripartite motif-containing 69	0.160166	1.61618	1.96452	0.405133	1.56704	1.63547	0.11982	1.50661	1.75822	-0.000940514	0.056013	0.226091	9.94212e-10	5.60269e-11	0.00579887	1.55477e-09	8.3671e-10	0.36023	2.73837e-09	2.90156e-10	0.994191	0.665555	7.84804	8.0082	9.46421	9.81255	7.90405	8.02387	9.41066	9.66227	7.8471	8.25223	9.41414	9.48256
A_51_P387235	59027	Nampt	nicotinamide phosphoribosyltransferase	0.4739	1.92645	1.96253	0.637644	2.37252	2.20275	0.49773	1.92184	1.62036	-0.247977	0.0758697	0.000496602	7.12023e-12	5.37527e-12	2.48029e-05	2.96208e-13	9.25253e-13	0.000316147	7.38358e-12	9.5574e-11	0.0367289	0.495389	12.6877	13.1616	14.6141	14.6502	12.7636	13.2613	14.6854	14.3839	12.4397	13.0774	14.8122	14.6425
A_55_P2142116	100043557	Gm4516	predicted gene 4516	0.479219	2.12362	1.95842	0.0242519	1.64487	1.32567	0.378817	1.99519	2.25058	0.295018	0.204618	0.00015581	2.94639e-13	1.02037e-12	0.806335	1.44498e-11	3.58903e-10	0.00130911	7.67558e-13	1.2045e-13	0.00798395	0.0517577	13.7896	14.2688	15.9132	15.748	13.9942	14.373	15.9894	16.2448	14.0846	14.1089	15.7295	15.4103
A_55_P1960251	208166	Gm609	predicted gene 609	0.0828768	1.303	1.9572	-0.0684718	0.522215	0.877956	-0.521258	0.168338	1.13422	-0.00945558	0.204375	0.6757	5.3304e-06	2.72658e-08	0.729391	0.0163405	0.000359939	0.0165053	0.399582	2.63693e-05	0.961826	0.309018	6.51502	6.5979	7.81802	8.47223	6.7194	6.19814	6.88774	7.85362	6.50557	6.4371	7.02778	7.38352
A_55_P1975660	93966	Hemgn	hemogen	0.452304	2.16016	1.95537	0.240637	1.82357	1.47067	0.288953	2.07505	2.19581	0.110499	0.21122	2.78564e-05	7.31298e-15	3.43338e-14	0.0071162	1.01031e-13	2.73622e-12	0.00193591	1.36612e-14	5.66821e-15	0.175574	0.0155319	13.33	13.7823	15.4902	15.2854	13.5412	13.8302	15.6163	15.7371	13.4405	13.6812	15.2641	14.9112
A_55_P1997756	16193	Il6	interleukin 6	0.514697	1.99013	1.95508	0.470053	1.7992	1.64218	0.498582	2.06495	1.92253	0.229943	0.321615	1.52781e-06	4.26515e-15	5.62509e-15	4.64842e-06	2.04638e-14	8.41497e-14	2.26836e-06	2.39949e-15	7.3048e-15	0.00441741	0.000280003	14.1687	14.6834	16.1588	16.1238	14.4903	14.9889	16.5553	16.4128	14.3986	14.8687	16.1978	16.0408
A_55_P2046253	66766	Tmem239	transmembrane 239	0.423134	2.20274	1.95348	0.104576	1.71981	1.3447	0.26924	2.05621	2.29687	0.228637	0.262058	0.000152758	2.37411e-14	1.52077e-13	0.240341	1.07587e-12	4.45761e-11	0.00637156	6.89301e-14	1.23987e-14	0.0169649	0.00758934	12.954	13.3771	15.1567	14.9075	13.216	13.4853	15.2723	15.5129	13.1826	13.2872	14.9024	14.5273
A_51_P172231	69146	Gsdmd	gasdermin D	0.118753	1.64768	1.94934	0.292472	2.15187	2.53582	0.17284	1.96703	2.35874	0.00168744	-0.10724	0.105082	7.52538e-14	5.54316e-15	0.000644025	1.18652e-15	9.07884e-17	0.023696	4.81551e-15	2.82341e-16	0.980818	0.14032	10.9966	11.1154	12.6443	12.946	10.8894	11.0622	12.8564	13.2481	10.9983	11.2908	13.1502	13.5342
A_55_P2147686	209588	Sectm1a	secreted and transmembrane 1A	0.0616118	2.1304	1.94885	0.0620212	2.21361	1.55438	0.0218173	1.83824	1.38133	0.117118	0.182188	0.549117	4.73097e-13	1.84885e-12	0.546497	2.62565e-13	5.6248e-11	0.831154	4.49854e-12	3.23278e-10	0.261784	0.089261	6.47733	6.53895	8.60774	8.42618	6.65952	6.68134	8.49776	8.04086	6.59445	6.65647	8.80807	8.14884
A_55_P1980287	11796	Birc3	baculoviral IAP repeat-containing 3	0.232479	1.26948	1.94884	0.0918505	1.11074	1.6158	0.295124	1.55917	2.43718	0.254293	0.042181	0.0962771	4.83141e-08	1.03755e-10	0.494951	2.90029e-07	1.61739e-09	0.0394271	2.70247e-09	3.59512e-12	0.071165	0.752552	8.83244	9.06491	10.1019	10.7813	8.87462	9.16974	10.4338	11.3118	9.08673	9.17858	10.1975	10.7025
A_66_P112006	15024	H2-T10	histocompatibility 2, T region locus 10	0.411796	1.94458	1.94567	0.703821	2.48236	2.89408	0.372732	1.82658	1.50993	-0.746824	0.14847	8.11305e-05	4.09707e-14	4.06172e-14	1.29215e-07	9.1692e-16	8.29234e-17	0.000220373	1.07843e-13	2.00312e-12	5.79705e-08	0.0766188	12.227	12.6387	14.1715	14.1726	12.3754	12.7482	14.202	13.8854	11.4801	12.184	13.9625	14.3742
A_55_P1999213	100121	Tdrd7	tudor domain containing 7	0.484279	1.93431	1.94521	0.567709	2.09184	2.00864	0.325237	1.73384	1.58693	-0.49435	0.00485191	1.02172e-05	2.9719e-14	2.72393e-14	1.49827e-06	8.81304e-15	1.65576e-14	0.000611727	1.6127e-13	6.29012e-13	8.03425e-06	0.950142	13.2574	13.7417	15.1917	15.2026	13.2622	13.5875	14.9961	14.8492	12.763	13.3307	14.8549	14.7717
A_55_P1953846	27404	Abca8b	ATP-binding cassette, sub-family A (ABC1), member 8b	0.0235013	1.40564	1.94496	0.0798255	1.00596	1.25597	0.0506624	1.22847	1.68858	-0.294298	-0.0174979	0.808853	1.15795e-10	8.60114e-13	0.415844	1.45604e-08	6.07583e-10	0.603275	8.38947e-10	7.40124e-12	0.00722784	0.857006	7.82165	7.84515	9.22728	9.76661	7.80415	7.85481	9.03262	9.49273	7.52735	7.60717	8.53331	8.78331
A_55_P1958255	81018	Rnf114	ring finger protein 114	0.235988	1.73403	1.94444	0.292991	1.56412	1.70077	0.196781	1.72888	2.47876	-0.00254111	-0.190699	0.00364867	3.5629e-14	6.01749e-15	0.000649645	1.75323e-13	4.80901e-14	0.0118876	3.73112e-14	1.35461e-16	0.971197	0.0142394	9.62653	9.86252	11.3606	11.571	9.43583	9.63261	11.1647	11.9146	9.62399	9.91698	11.1881	11.3248
A_55_P2054728	241576	Ldlrad3	low density lipoprotein receptor class A domain containing 3	0.380145	2.13881	1.94147	0.177422	1.79185	1.45987	0.192984	2.01121	2.21078	0.108588	0.279396	0.000602752	6.83782e-14	3.04203e-13	0.0640276	1.04069e-12	2.32869e-11	0.0459579	1.76693e-13	4.09757e-14	0.240889	0.00644872	12.999	13.3791	15.1378	14.9404	13.2784	13.4713	15.2896	15.4891	13.1076	13.285	14.8994	14.5674
A_51_P236864	52552	Parp8	poly (ADP-ribose) polymerase family, member 8	0.180079	1.96211	1.94087	0.138405	1.74687	1.48989	0.022691	2.46653	2.58667	-0.0310677	0.0695279	0.0151762	2.55491e-15	3.02747e-15	0.0529096	1.5586e-14	1.82735e-13	0.736148	7.1223e-17	3.37569e-17	0.645075	0.309096	11.3009	11.481	13.263	13.2418	11.3704	11.3931	13.8369	13.9571	11.2698	11.4082	13.0167	12.7597
A_51_P454217	18034	Nfkb2	nuclear factor of kappa light polypeptide gene enhancer in B cells 2, p49/p100	0.00154122	0.968913	1.93892	0.0123076	0.496536	1.37708	0.0108037	1.04628	2.15651	0.253212	-0.187951	0.982674	2.76895e-10	7.16539e-15	0.862384	2.60883e-06	1.40711e-12	0.879048	8.88486e-11	1.36519e-15	0.00230582	0.016175	11.9514	11.9529	12.9203	13.8903	11.7634	11.7742	12.8097	13.9199	12.2046	12.2169	12.7011	13.5816
A_51_P477019	100037283	Rnaset2a	ribonuclease T2A	0.0386296	1.23119	1.93814	-0.0425363	1.15902	2.11383	0.0621876	1.42747	2.37452	-0.0666975	-0.0794769	0.572488	4.12553e-12	3.78634e-15	0.534735	1.03015e-11	9.77619e-16	0.367425	4.30682e-13	1.58382e-16	0.334644	0.253192	7.51089	7.54952	8.74208	9.44903	7.43142	7.4936	8.85889	9.80594	7.4442	7.40166	8.60321	9.55802
A_55_P2146708	69085	Zcchc9	zinc finger, CCHC domain containing 9	0.42918	2.06297	1.93409	0.220879	1.76267	1.5255	0.208424	1.84131	2.05768	0.0802196	0.288141	9.60761e-05	4.01092e-14	1.08745e-13	0.0172252	4.53848e-13	4.12551e-12	0.0233293	2.3202e-13	4.17384e-14	0.348587	0.00319598	13.7955	14.2247	15.8585	15.7296	14.0837	14.2921	15.925	16.1413	13.8757	14.0966	15.6384	15.4012
A_51_P203182	171504	Apobr	apolipoprotein B receptor	0.217316	1.40345	1.93017	0.146261	0.827999	1.03741	0.211701	1.38371	1.50725	0.661036	-0.103377	0.00557493	6.68424e-13	4.84298e-15	0.0467244	1.77511e-09	6.48208e-11	0.0066291	8.30385e-13	2.23361e-13	4.23804e-08	0.147103	10.529	10.7464	11.9325	12.4592	10.4257	10.6374	11.8094	11.9329	11.1901	11.3363	12.0181	12.2275
A_55_P2015143	226861	Hhat	hedgehog acyltransferase	0.251628	1.51485	1.92702	0.0564556	1.14178	1.27981	-0.10839	0.12376	1.87038	-0.0375581	0.373241	0.481007	0.000511468	4.74696e-05	0.873419	0.0048133	0.00209384	0.759956	0.72731	6.51804e-05	0.915572	0.30044	8.04133	8.29296	9.55618	9.96835	8.41457	8.30618	8.53833	10.285	8.00377	8.06023	9.14555	9.28358
A_51_P209150	18526	Pcdh10	protocadherin 10	-0.198076	1.11398	1.92655	-0.190702	0.916953	1.55093	-0.0737608	1.50051	2.04643	0.250584	-0.252457	0.0103838	2.40939e-11	5.39772e-15	0.0129809	4.33482e-10	1.5556e-13	0.295365	2.58789e-13	2.10663e-15	0.00206809	0.00195192	7.35477	7.15669	8.46875	9.28132	7.10231	7.02855	8.60283	9.14874	7.60535	7.41465	8.52231	9.15629
A_55_P2180531	70661	Sik3	SIK family kinase 3	0.181306	1.91133	1.92504	0.0873129	1.64236	1.53051	0.13249	1.9812	1.89853	0.0848238	-0.110136	0.0520724	2.37085e-13	2.12384e-13	0.327015	2.41947e-12	7.06206e-12	0.144567	1.36358e-13	2.62919e-13	0.34058	0.220411	8.89521	9.07652	10.8065	10.8203	8.78507	8.91756	10.7663	10.6836	8.98003	9.06735	10.6224	10.5105
A_66_P111430	69221	2410006H16Rik	RIKEN cDNA 2410006H16 gene	0.304881	1.19686	1.92413	0.112169	0.46532	1.16471	0.300211	0.941857	2.1695	0.190111	-0.0341916	0.00102918	4.24563e-11	3.01887e-14	0.159822	1.54026e-05	6.37633e-11	0.00117043	1.4461e-09	4.67662e-15	0.0237977	0.659101	13.7748	14.0796	14.9716	15.6989	13.7406	14.0408	14.6824	15.9101	13.9649	14.077	14.4302	15.1296
A_55_P2410106	100137727	9130230N09Rik	RIKEN cDNA 9130230N09 gene	0.210015	1.24061	1.92364	0.0387674	0.804776	1.15547	0.108554	0.733819	1.87704	0.20001	-0.110445	0.187411	4.71468e-07	1.101e-09	0.802513	7.69948e-05	1.17078e-06	0.48672	0.000195372	1.57011e-09	0.208154	0.479281	7.39392	7.60394	8.63454	9.31756	7.28348	7.39203	8.0173	9.16052	7.59393	7.6327	8.39871	8.7494
A_51_P414889	70110	Ifi35	interferon-induced protein 35	0.514457	2.06567	1.9205	0.516334	2.22664	2.12757	0.324356	2.01115	1.77227	-0.388159	-0.118593	1.6346e-06	2.5775e-15	8.0191e-15	1.56194e-06	7.98693e-16	1.62603e-15	0.00027073	3.91094e-15	2.79145e-14	4.37139e-05	0.10836	13.4632	13.9777	15.5289	15.3837	13.3446	13.669	15.3558	15.1169	13.0751	13.5914	15.3017	15.2026
A_55_P1985433	211323	Nrg1	neuregulin 1	-0.197918	1.4061	1.9182	-0.163415	0.768725	0.970673	-0.237049	1.58238	2.158	-0.150297	0.0943559	0.00196536	1.66377e-14	1.30541e-16	0.0076126	1.63577e-10	4.95017e-12	0.000426689	2.64768e-15	2.05417e-17	0.0126547	0.0969436	11.0138	10.8159	12.4199	12.932	11.1082	10.8712	12.6906	13.2662	10.8636	10.7001	11.6323	11.8342
A_51_P380005	14425	Galnt3	UDP-N-acetyl-alpha-D-galactosamine:polypeptide N-acetylgalactosaminyltransferase 3	0.397652	2.13454	1.91803	0.343869	1.98671	1.56506	0.380394	2.18407	1.58954	0.78797	-0.0821744	3.82713e-05	1.85976e-15	9.84037e-15	0.000172541	5.69275e-15	2.28989e-13	6.1564e-05	1.29996e-15	1.80303e-13	6.3198e-09	0.261207	7.83135	8.229	9.96589	9.74938	7.74917	8.12957	9.93325	9.33872	8.61932	8.96319	10.606	10.1844
A_51_P182572	218194	Phactr1	phosphatase and actin regulator 1	-0.00592024	2.09331	1.91397	0.107673	2.50297	1.84876	0.0268917	2.11546	1.38921	0.0621223	0.144062	0.935724	3.675e-15	1.48048e-14	0.1558	2.25054e-16	2.53523e-14	0.71469	3.11902e-15	2.05969e-12	0.402734	0.0636652	8.92716	8.92124	11.0205	10.8411	9.07123	9.09812	11.1867	10.4604	8.98929	9.09696	11.4923	10.838
A_55_P2423586	14048	Eya1	eyes absent 1 homolog (Drosophila)	0.366817	2.1457	1.91308	0.265464	1.88819	1.55825	0.265076	2.11226	2.21942	0.0165172	0.173692	0.00509477	2.47423e-12	1.40844e-11	0.0320473	1.71559e-11	2.99595e-10	0.032265	3.14233e-12	1.47803e-12	0.885583	0.143825	13.029	13.3958	15.1747	14.9421	13.2027	13.4677	15.3149	15.4221	13.0455	13.311	14.9337	14.6037
A_51_P444290	74748	Slamf8	SLAM family member 8	-0.0255835	1.18755	1.91121	-0.0372405	1.43343	1.78055	0.0401199	1.46825	1.61725	0.060873	0.0388338	0.696603	3.91515e-12	2.54259e-15	0.571378	2.19939e-13	7.66125e-15	0.542337	1.51957e-13	3.41145e-14	0.358934	0.555208	6.30876	6.28318	7.49631	8.21997	6.3476	6.38772	7.81585	7.96484	6.36964	6.3324	7.80307	8.15019
A_55_P2079860	230837	Asap3	ArfGAP with SH3 domain, ankyrin repeat and PH domain 3	0.199198	2.34585	1.91096	0.396101	2.75636	2.09724	0.265478	2.57877	1.70635	-0.299457	0.00390347	0.0269873	4.26059e-15	1.02533e-13	0.000183297	3.43276e-16	2.4308e-14	0.00509328	9.72807e-16	5.85797e-13	0.00212562	0.96251	10.526	10.7251	12.8718	12.4369	10.5299	10.7953	13.1086	12.2362	10.2265	10.6226	12.9829	12.3237
A_52_P650028	210293	Dock10	dedicator of cytokinesis 10	0.0772572	1.27668	1.91038	0.120275	1.45692	2.02065	0.360669	1.0058	1.92937	0.762156	-0.174408	0.683989	4.08055e-06	2.11162e-08	0.527861	7.9031e-07	9.63099e-09	0.0709607	6.1054e-05	1.84005e-08	0.000868308	0.36333	8.32146	8.39871	9.59814	10.2318	8.14705	8.50772	9.15284	10.0764	9.08361	9.20389	10.5405	11.1043
A_55_P2072110	24050	Sept3	septin 3	0.433778	2.09959	1.90973	0.140757	1.83968	1.51601	0.278199	1.99689	2.1495	0.126678	0.270296	0.000712279	9.27725e-13	3.93658e-12	0.193464	6.93882e-12	1.26293e-10	0.0163868	1.99594e-12	6.47385e-13	0.239492	0.0191349	13.4407	13.8744	15.5403	15.3504	13.711	13.9892	15.7079	15.8605	13.5673	13.7081	15.407	15.0834
A_55_P2117731	70584	Pak4	p21 protein (Cdc42/Rac)-activated kinase 4	0.45766	2.06959	1.90712	0.254333	1.81174	1.59029	0.259684	1.98114	2.11489	0.058759	0.269897	0.000230882	4.00441e-13	1.40096e-12	0.0183078	3.06254e-12	2.20029e-11	0.016358	7.82475e-13	2.8708e-13	0.552107	0.0131771	13.7877	14.2453	15.8573	15.6948	14.0576	14.3172	16.0387	16.1724	13.8464	14.1008	15.6582	15.4367
A_55_P1987993	100041289	Gm3255	predicted gene 3255	0.436042	2.07603	1.90694	0.146103	1.70568	1.45399	0.283719	2.0291	2.15029	0.121678	0.260098	2.93512e-05	8.26161e-15	3.08991e-14	0.0709669	1.7322e-13	2.00301e-12	0.00173987	1.17883e-14	4.78094e-15	0.1267	0.00336047	14.0763	14.5124	16.1524	15.9833	14.3364	14.6201	16.3655	16.4867	14.198	14.3441	15.9037	15.652
A_55_P2127973	668339	Gm9112	predicted gene 9112	-0.0036751	1.56598	1.90554	0.00352393	1.67922	1.78565	0.0328414	1.53847	1.67168	0.0132314	0.125443	0.965593	3.21239e-12	1.58948e-13	0.967007	1.10772e-12	4.3197e-13	0.70056	4.20566e-12	1.18661e-12	0.876626	0.154337	6.12918	6.1255	7.69516	8.03471	6.25462	6.28746	7.79309	7.92629	6.14241	6.14593	7.82162	7.92806
A_55_P1966734	71519	Cyp2u1	cytochrome P450, family 2, subfamily u, polypeptide 1	0.466221	2.06811	1.90499	0.162902	1.79897	1.49028	0.342525	1.94762	2.18736	0.100176	0.245606	2.46853e-05	1.94511e-14	6.94404e-14	0.0572613	1.68058e-13	3.0053e-12	0.000548657	4.9313e-14	8.14081e-15	0.225643	0.00706921	14.2668	14.733	16.3349	16.1717	14.5124	14.8549	16.46	16.6997	14.3669	14.5298	16.1659	15.8572
A_52_P80944	22695	Zfp36	zinc finger protein 36	0.283324	1.55158	1.90404	0.187087	1.41999	1.47904	0.405082	2.32558	2.4542	0.179713	0.0476548	0.0509554	3.87304e-09	1.97693e-10	0.182454	1.35607e-08	7.64501e-09	0.00821371	9.94537e-12	4.40055e-12	0.199339	0.727153	8.03616	8.31949	9.58774	9.9402	8.08382	8.4889	10.4094	10.538	8.21588	8.40296	9.63586	9.69491
A_55_P2034415	231549	Lrrc8d	leucine rich repeat containing 8D	0.199838	0.790942	1.90093	0.164556	0.152514	1.33642	0.168778	1.11255	2.05083	0.22389	0.0773756	0.0252309	4.06e-08	9.4525e-14	0.0589922	0.0778211	2.04659e-11	0.0534404	3.13138e-10	2.92097e-14	0.0138043	0.353142	11.4271	11.627	12.2181	13.3281	11.5045	11.6733	12.6171	13.5553	11.651	11.8156	11.8035	12.9874
A_55_P2023772	66540	Fam107b	family with sequence similarity 107, member B	0.00564324	0.934606	1.90075	-0.056724	0.35113	1.17815	-0.0771401	0.985586	2.04022	0.0629495	-0.108082	0.93554	3.66095e-10	7.48774e-15	0.421088	0.000107183	1.16137e-11	0.278061	1.67383e-10	2.48492e-15	0.373085	0.13528	11.914	11.9196	12.8486	13.8147	11.8059	11.7288	12.7915	13.8461	11.9769	11.9202	12.3281	13.1551
A_55_P1956223	12660	Chka	choline kinase alpha	0.199341	0.931346	1.89634	0.183585	0.825734	1.61897	0.19475	0.408904	2.20888	0.0870497	-0.190741	0.421473	0.00141873	7.50003e-07	0.458394	0.00355815	5.31364e-06	0.43203	0.110039	1.00996e-07	0.723322	0.441383	10.4626	10.6619	11.3939	12.3589	10.2718	10.4666	10.6807	12.4807	10.5496	10.7332	11.3754	12.1686
A_55_P2401403	327885	C030046G05	uncharacterized protein C030046G05	0.43135	1.37386	1.89515	0.112757	1.32727	1.66492	0.0730774	1.40791	1.64204	-0.119335	0.363192	3.82141e-05	5.80366e-12	4.17891e-14	0.160051	9.78303e-12	3.08411e-13	0.353762	4.00287e-12	3.81503e-13	0.138491	0.000223499	10.5194	10.9507	11.8932	12.4145	10.8826	10.9556	12.2905	12.5246	10.4	10.5128	11.7273	12.0649
A_55_P2062549	624710	Gm6524	katanin p60 (ATPase-containing) subunit A1 pseudogene	0.26175	2.17462	1.89506	0.274805	2.09493	1.47606	0.270511	2.39329	1.75858	-0.0801486	-0.0546882	0.00557432	1.36831e-14	1.15227e-13	0.00398616	2.4425e-14	5.28436e-12	0.00445154	3.08051e-15	3.6428e-13	0.341204	0.512783	12.2819	12.5437	14.4566	14.177	12.2273	12.4978	14.6205	13.9858	12.2018	12.4766	14.2967	13.6779
A_55_P2149144	70873	Cnbd2	cyclic nucleotide binding domain containing 2	0.0513971	0.967335	1.89471	0.0472198	0.266308	0.920435	0.0692326	0.620026	1.7074	-0.264544	0.0391098	0.72118	4.1806e-06	4.6283e-10	0.742925	0.0782619	7.55897e-06	0.631282	0.00047272	2.09823e-09	0.0800696	0.785776	7.68463	7.73603	8.65197	9.57934	7.72374	7.79298	8.34377	9.43114	7.42009	7.46731	7.6864	8.34052
A_51_P421876	54123	Irf7	interferon regulatory factor 7	0.280365	1.62065	1.88956	0.719441	2.61071	3.26903	0.19404	1.67908	2.32728	-1.07195	-0.161428	0.0061583	4.55527e-12	4.36891e-13	5.0069e-07	2.92657e-15	8.68322e-17	0.0442551	2.65856e-12	1.74932e-14	2.09406e-09	0.0880473	11.3073	11.5877	12.928	13.1969	11.1459	11.3399	12.825	13.4732	10.2354	10.9548	12.8461	13.5044
A_52_P1197913	17873	Gadd45b	growth arrest and DNA-damage-inducible 45 beta	0.267996	1.29276	1.88941	0.0703576	0.873548	1.44397	0.507818	1.84358	2.12	-0.404608	0.0847103	0.00129629	2.88294e-12	8.33561e-15	0.321419	9.9498e-10	5.31768e-13	1.61749e-06	1.22102e-14	1.38524e-15	2.38281e-05	0.235786	13.3763	13.6443	14.669	15.2657	13.461	13.9688	15.3046	15.581	12.9717	13.042	13.8452	14.4156
A_51_P518893	442829	Ccin	calicin	0.104148	0.993781	1.8889	-0.0584334	0.620618	1.10522	0.00138681	0.750699	2.05892	0.0560245	0.0381321	0.477742	3.50232e-06	5.79893e-10	0.688753	0.000523872	9.34527e-07	0.992395	8.30568e-05	1.63307e-10	0.700893	0.793494	8.76344	8.86759	9.75722	10.6523	8.80157	8.80296	9.55227	10.8605	8.81947	8.76103	9.44008	9.92468
A_51_P249793	67446	Dusp28	dual specificity phosphatase 28	0.255783	2.07895	1.88854	0.485954	2.51151	2.37114	0.279438	2.05197	1.77539	0.184138	0.0556758	0.00245673	3.22379e-15	1.43714e-14	4.24368e-06	1.67907e-16	4.13288e-16	0.0012217	3.9518e-15	3.74723e-14	0.0199317	0.445501	10.153	10.4088	12.2319	12.0415	10.2087	10.4881	12.2606	11.9841	10.3371	10.8231	12.8486	12.7083
A_51_P367285	71956	Rnf135	ring finger protein 135	0.611905	2.53507	1.888	0.791197	2.59325	2.27639	0.675535	2.66456	1.7474	-0.279931	-0.0770227	7.75523e-08	4.06675e-17	4.09174e-15	2.12694e-09	2.84753e-17	2.20014e-16	1.99314e-08	1.8593e-17	1.3639e-14	0.000602035	0.257814	10.9541	11.566	13.4891	12.8421	10.877	11.5526	13.5416	12.6244	10.6741	11.4653	13.2674	12.9505
A_55_P1982319	83398	Ndst3	N-deacetylase/N-sulfotransferase (heparan glucosaminyl) 3	0.435214	2.51669	1.88774	0.266163	2.16481	1.11842	0.266668	2.53043	1.59299	0.527096	-0.126356	2.60923e-05	3.36775e-16	2.97595e-14	0.00258418	3.5412e-15	8.65799e-11	0.00254761	3.09246e-16	4.08765e-13	2.78107e-06	0.109615	7.32875	7.76396	9.84543	9.21649	7.20239	7.46906	9.73282	8.79538	7.85584	8.12201	10.0206	8.97426
A_55_P2107422	16564	Kif21a	kinesin family member 21A	0.194633	0.747268	1.88717	0.0285411	0.396524	1.2176	0.108917	1.11045	2.11754	-0.424457	0.186175	0.0710329	1.50787e-06	2.98959e-12	0.780276	0.00118342	2.00945e-09	0.295081	7.48066e-09	5.14293e-13	0.000662624	0.0828998	9.66075	9.85538	10.408	11.5479	9.84692	9.95584	10.9574	11.9645	9.23629	9.26483	9.63282	10.4539
A_55_P2059606	20847	Stat2	signal transducer and activator of transcription 2	0.809854	1.82543	1.886	1.14978	2.15181	2.31958	0.827318	1.73897	1.58382	-0.618932	0.0400559	6.91076e-08	4.62454e-13	2.80054e-13	4.83909e-10	3.65772e-14	1.14109e-14	5.16773e-08	9.7279e-13	4.04405e-12	2.27404e-06	0.648143	14.4515	15.2614	16.2769	16.3375	14.4916	15.3189	16.2305	16.0754	13.8326	14.9824	15.9844	16.1522
A_52_P481279	381738	Drc1	dynein regulatory complex subunit 1	0.211723	1.57842	1.8847	0.390051	1.56658	1.67188	0.00985145	1.08787	1.3705	0.116165	0.00140615	0.103122	8.05533e-10	5.89119e-11	0.00579201	8.98736e-10	3.47355e-10	0.936866	1.48217e-07	6.13519e-09	0.356892	0.990978	7.68325	7.89497	9.26167	9.56795	7.68466	7.69451	8.77252	9.05516	7.79941	8.18947	9.366	9.47129
A_55_P1964433	332934	Zmynd12	zinc finger, MYND domain containing 12	0.238052	1.15307	1.88466	0.0780183	0.546127	1.0646	0.277951	0.921326	1.41375	-0.47107	-0.129561	0.00839309	1.33371e-10	7.67884e-14	0.338932	3.73194e-06	4.3256e-10	0.00291744	3.50748e-09	6.27551e-12	2.09765e-05	0.121228	7.23886	7.47691	8.39192	9.12351	7.1093	7.38725	8.03062	8.52305	6.76779	6.8458	7.31391	7.83238
A_66_P138673	434204	Whamm	WAS protein homolog associated with actin, golgi membranes and microtubules	0.506779	2.30135	1.88326	0.445816	2.20743	1.73708	0.405623	2.80971	1.67343	-0.227088	0.0658447	0.000604039	1.8458e-12	3.82612e-11	0.00176623	3.48147e-12	1.27532e-10	0.00359783	8.61208e-14	2.21503e-10	0.0742713	0.587269	8.6032	9.10998	10.9046	10.4865	8.66905	9.07467	11.4788	10.3425	8.37611	8.82193	10.5835	10.1132
A_55_P2032755	100043589	Gm10586	predicted gene 10586	0.460057	1.90242	1.8827	0.215995	1.68846	1.54835	0.193894	1.82585	2.02388	0.032552	0.324583	6.0113e-06	8.6058e-15	1.01195e-14	0.00673269	5.47774e-14	2.08583e-13	0.0130388	1.62931e-14	3.28314e-15	0.64521	0.000256621	14.4149	14.875	16.3173	16.2976	14.7395	14.9334	16.5654	16.7634	14.4475	14.6635	16.1359	15.9958
A_51_P367843	67710	Polr2g	polymerase (RNA) II (DNA directed) polypeptide G	0.116303	1.03624	1.88235	0.10321	0.515643	1.27786	-0.0365398	0.765158	1.60784	-0.11331	0.0903251	0.168274	8.33749e-10	1.0323e-13	0.218538	9.14858e-06	3.76876e-11	0.656269	6.03818e-08	1.16355e-12	0.178841	0.278869	14.6781	14.7945	15.7144	16.5605	14.7685	14.7319	15.5336	16.3763	14.5648	14.668	15.0805	15.8427
A_66_P129800	235442	Rab8b	RAB8B, member RAS oncogene family	0.34819	1.8447	1.88159	0.093581	1.45337	1.28252	0.150696	2.07433	2.40686	-0.00778138	0.174018	0.00630491	1.79571e-11	1.33247e-11	0.41043	6.18002e-10	3.76242e-09	0.192398	3.04115e-12	3.12758e-13	0.944833	0.135646	11.8547	12.2029	13.6994	13.7363	12.0287	12.1794	14.1031	14.4356	11.8469	11.9405	13.3003	13.1294
A_55_P2139341	434179	Gm5595	predicted gene 5595	0.783757	2.23107	1.87882	0.901988	2.26919	1.95362	0.682438	2.0471	1.78996	-0.262969	-0.054173	1.56768e-07	3.22764e-14	4.57299e-13	2.31508e-08	2.48219e-14	2.50955e-13	9.51545e-07	1.22127e-13	9.609e-13	0.0091091	0.549429	13.7283	14.5121	15.9594	15.6071	13.6741	14.3566	15.7212	15.4641	13.4653	14.3673	15.7345	15.419
A_66_P105689	94094	Trim34a	tripartite motif-containing 34A	0.887948	2.28433	1.87682	0.911149	2.24221	1.88393	0.829155	2.18142	1.59201	-0.200821	0.203658	6.93795e-09	4.60984e-15	9.71498e-14	4.81145e-09	6.15934e-15	9.16418e-14	1.81579e-08	9.44532e-15	1.21852e-12	0.0233056	0.0217003	11.7098	12.5977	13.9941	13.5866	11.9134	12.7426	14.0949	13.5054	11.5089	12.4201	13.7512	13.3929
A_55_P2050488	217882	Cep170b	centrosomal protein 170B	0.377028	2.03722	1.87228	0.194563	1.7928	1.4581	0.261841	1.98612	2.1259	0.0732718	0.212288	0.000514888	9.72127e-14	3.56944e-13	0.0397498	6.94493e-13	1.60668e-11	0.00828133	1.4387e-13	5.03148e-14	0.411384	0.0265813	13.5645	13.9416	15.6018	15.4368	13.7768	14.0387	15.7629	15.9027	13.6378	13.8324	15.4306	15.0959
A_55_P2083879	57276	Vsig2	V-set and immunoglobulin domain containing 2	0.471126	2.52078	1.87031	0.473329	2.43141	2.04722	0.679371	2.75818	2.2812	-0.981176	-0.458241	0.00186105	1.18175e-12	1.06692e-10	0.0017941	2.05049e-12	2.76768e-11	6.39835e-05	2.97295e-13	5.4074e-12	8.6855e-07	0.00230601	8.93733	9.40845	11.4581	10.8076	8.47909	9.15846	11.2373	10.7603	7.95615	8.42948	10.3876	10.0034
A_51_P198434	14972	H2-K1	histocompatibility 2, K1, K region	0.156718	1.31714	1.86692	0.125806	1.80109	2.42996	0.204097	1.40765	1.89875	-0.640804	0.229642	0.0295355	1.04562e-12	4.77355e-15	0.0730621	8.34615e-15	7.74174e-17	0.00673077	3.77485e-13	3.66841e-15	4.05829e-08	0.00297047	15.4099	15.5666	16.727	17.2768	15.6395	15.8436	17.0472	17.5382	14.7691	14.8949	16.5701	17.199
A_55_P2101357	216549	Aftph	aftiphilin	0.767937	2.30681	1.86517	0.715368	2.19498	1.68845	0.585324	2.0364	1.79065	-0.0833058	-0.0666511	1.00888e-05	2.33769e-12	5.77305e-11	2.26455e-05	4.97652e-12	2.52671e-10	0.000186106	1.54648e-11	1.05935e-10	0.501043	0.589373	13.0815	13.8494	15.3883	14.9467	13.0148	13.6002	15.0513	14.8055	12.9982	13.7136	15.1932	14.6866
A_51_P155196	99382	Abtb2	ankyrin repeat and BTB (POZ) domain containing 2	0.222894	2.2541	1.86388	0.217015	1.87453	1.25009	0.182478	2.35933	2.05404	0.170769	-0.187866	0.00339813	2.10217e-16	4.09889e-15	0.0041122	3.75079e-15	1.95086e-12	0.0124908	1.02813e-16	9.00154e-16	0.0180794	0.0105209	11.0544	11.2773	13.3085	12.9183	10.8666	11.049	13.2259	12.9206	11.2252	11.4422	13.0997	12.4753
A_55_P2117710	83673	Snhg1	small nucleolar RNA host gene (non-protein coding) 1	0.508527	1.30965	1.86202	0.143831	0.61881	1.17248	0.425281	1.05773	2.04555	0.179137	-0.136376	1.86398e-05	5.3565e-11	2.56073e-13	0.108341	1.81022e-06	2.76346e-10	0.000126083	1.24375e-09	6.00529e-14	0.0501992	0.126366	11.1588	11.6673	12.4684	13.0208	11.0224	11.4477	12.0801	13.068	11.3379	11.4817	11.9567	12.5104
A_55_P1989733	18036	Nfkbib	nuclear factor of kappa light polypeptide gene enhancer in B cells inhibitor, beta	-0.000445029	0.820363	1.86125	0.115666	0.499567	1.4623	-0.0292873	0.825329	2.16408	0.214561	-0.131991	0.996254	1.70883e-07	1.17338e-12	0.233134	6.64833e-05	4.51593e-11	0.757698	1.5768e-07	1.15788e-13	0.0354042	0.176512	12.6532	12.6527	13.4735	14.5144	12.5212	12.4919	13.3465	14.6852	12.8677	12.9834	13.3673	14.33
A_51_P414126	19331	Rab19	RAB19, member RAS oncogene family	0.601834	3.08302	1.86124	0.615898	3.20639	2.44741	0.28649	2.50702	1.42425	0.22684	0.171104	0.000255583	6.89955e-14	1.46682e-10	0.000204572	3.75956e-14	2.38986e-12	0.040655	1.65589e-12	7.10615e-09	0.0968608	0.201977	7.22442	7.82625	10.3074	9.08566	7.39552	7.68201	9.90253	8.81977	7.45126	8.06715	10.6576	9.89866
A_55_P1987650	18163	Ctnnd2	catenin (cadherin associated protein), delta 2	0.0385349	1.55902	1.86049	0.174985	1.97533	2.4135	-0.0897957	1.11349	1.92216	-0.0856231	-0.230026	0.721829	1.21807e-10	8.61332e-12	0.119497	3.4732e-12	1.61522e-13	0.410945	1.57065e-08	5.2562e-12	0.432575	0.0461362	9.02969	9.06823	10.5887	10.8902	8.79967	8.70987	9.91316	10.7218	8.94407	9.11906	10.9194	11.3576
A_52_P638605	11768	Ap1m2	adaptor protein complex AP-1, mu 2 subunit	0.152135	1.24591	1.86009	0.165382	0.756192	1.05945	-0.0281103	0.567123	0.612647	-0.114636	-0.0595578	0.259108	5.33217e-08	1.74499e-10	0.221584	2.71269e-05	4.62478e-07	0.831538	0.000492162	0.000239719	0.390975	0.653021	6.21119	6.36333	7.4571	8.07128	6.15163	6.12352	6.71876	6.76428	6.09655	6.26194	6.85275	7.156
A_55_P2002667	22670	Trim26	tripartite motif-containing 26	0.631809	2.05796	1.84897	0.571756	1.78979	1.36021	0.526504	1.91386	1.60424	-0.260448	-0.0653121	4.20947e-09	6.638e-17	3.55629e-16	1.72188e-08	5.91636e-16	4.24393e-14	5.3733e-08	2.07204e-16	3.268e-15	0.000227548	0.252174	13.1909	13.8227	15.2488	15.0398	13.1256	13.6521	15.0394	14.7298	12.9304	13.5022	14.7202	14.2906
A_55_P2011121	75178	Meiob	meiosis specific with OB domains	0.107558	1.89692	1.84734	0.0708879	2.02294	1.80374	0.0074512	1.59454	1.55301	0.00168981	0.0892725	0.208901	1.23166e-13	1.8528e-13	0.400849	4.55807e-14	2.67627e-13	0.928834	1.76954e-12	2.64578e-12	0.983838	0.293207	6.67224	6.7798	8.56917	8.51958	6.76152	6.76897	8.35606	8.31453	6.67393	6.74482	8.69688	8.47767
A_55_P2135980	64380	Ms4a4c	membrane-spanning 4-domains, subfamily A, member 4C	0.416939	1.95218	1.84688	0.143306	1.67063	1.50671	0.263167	2.02598	2.11076	0.085035	0.253471	0.000869553	2.19287e-12	5.09543e-12	0.179139	2.317e-11	1.08375e-10	0.0201949	1.24475e-12	6.6467e-13	0.416646	0.0244566	13.855	14.2719	15.8072	15.7019	14.1085	14.3716	16.1344	16.2192	13.94	14.0833	15.6107	15.4467
A_55_P2173664	268729	Gm626	predicted gene 626	0.388897	2.04065	1.84452	0.227405	1.87472	1.51434	0.244165	2.2555	2.3084	-0.0018284	0.118375	0.000653114	2.30739e-13	1.08766e-12	0.025178	8.48361e-13	2.1675e-11	0.0174314	4.92106e-14	3.43695e-14	0.984393	0.21671	12.6455	13.0344	14.6862	14.49	12.7639	13.0081	15.0194	15.0723	12.6437	12.8711	14.5184	14.158
A_55_P2146693	100043807	Gm4661	predicted gene 4661	0.163736	1.83644	1.84282	0.0451707	1.41783	1.24943	-0.0265733	1.55347	1.19332	0.0122633	0.1656	0.0768688	4.54389e-13	4.30843e-13	0.608882	2.31916e-11	1.52922e-10	0.762773	5.84026e-12	3.0124e-10	0.889088	0.0738797	6.60327	6.767	8.43971	8.44609	6.76887	6.74229	8.32234	7.96219	6.61553	6.6607	8.03336	7.86497
A_51_P249286	19734	Rgs16	regulator of G-protein signaling 16	0.675162	1.82924	1.84137	0.357862	1.54362	1.32903	0.830567	2.11082	1.94149	0.290263	-0.214592	2.03847e-08	6.80636e-15	6.14064e-15	5.53495e-05	9.46391e-14	9.4531e-13	1.0708e-09	7.29362e-16	2.6914e-15	0.000438771	0.00489316	14.8267	15.5019	16.656	16.6681	14.6122	15.4427	16.723	16.5537	15.117	15.4749	16.6606	16.446
A_55_P1956130	68395	LOC68395	histocompatibility 2, Q region locus 6-like	0.0358038	1.24125	1.84126	0.192658	1.62153	2.25974	0.221743	1.43678	2.02405	-0.694832	-0.122519	0.762003	1.18986e-08	3.83153e-11	0.116969	2.53098e-10	1.73088e-12	0.0746274	1.47972e-09	9.22347e-12	1.99729e-05	0.307517	13.834	13.8698	15.0752	15.6753	13.7115	13.9332	15.1483	15.7355	13.1392	13.3318	14.7607	15.3989
A_55_P2095573	214616	Spata5l1	spermatogenesis associated 5-like 1	0.109932	1.27015	1.84088	0.0427479	0.88077	1.57285	0.363932	1.52436	2.25554	0.0452269	-0.0217574	0.24958	2.95273e-10	1.11547e-12	0.648422	5.40541e-08	1.2186e-11	0.00114778	1.95334e-11	4.89519e-14	0.62966	0.816036	7.25251	7.36244	8.52265	9.09339	7.23075	7.59468	8.75511	9.48629	7.29773	7.34048	8.1785	8.87059
A_55_P1994603	16443	Itsn1	intersectin 1 (SH3 domain protein 1A)	0.412986	1.95626	1.83939	0.226875	1.70674	1.51113	0.300444	2.00798	2.12629	-0.00547178	0.17627	0.000172185	1.23301e-13	3.1843e-13	0.0165594	1.00363e-12	6.40542e-12	0.00271142	8.24148e-14	3.39873e-14	0.949292	0.0539676	13.9748	14.3878	15.9311	15.8142	14.1511	14.4515	16.1591	16.2774	13.9693	14.1962	15.6761	15.4805
A_51_P503883	102075	Plekhg4	pleckstrin homology domain containing, family G (with RhoGef domain) member 4	0.160056	1.25971	1.83834	0.0872871	0.703811	0.801684	0.088045	1.18617	1.31238	-0.0544797	-0.0288876	0.121543	8.22496e-10	2.92237e-12	0.385645	2.25008e-06	4.31837e-07	0.381633	1.96509e-09	4.52262e-10	0.585413	0.771626	9.4764	9.63646	10.7361	11.3147	9.44751	9.53556	10.6337	10.7599	9.42192	9.50921	10.1257	10.2236
A_55_P2019054	100705	Acacb	acetyl-Coenzyme A carboxylase beta	0.510716	2.02035	1.8382	0.437525	1.7671	1.56785	0.389415	1.82235	1.43395	-0.394482	0.00739046	4.16919e-05	2.39026e-13	1.01888e-12	0.000204295	1.86132e-12	1.14391e-11	0.000603082	1.16319e-12	4.37535e-11	0.000537494	0.936499	8.88936	9.40007	10.9097	10.7276	8.89675	9.28616	10.7191	10.3307	8.49488	8.9324	10.262	10.0627
A_55_P2028570	27029	Sgsh	N-sulfoglucosamine sulfohydrolase (sulfamidase)	0.30864	2.02516	1.83747	0.169312	1.85254	1.61859	0.258884	2.06005	2.20191	0.0153158	0.131872	0.0111613	2.80858e-12	1.2266e-11	0.134992	1.08427e-11	8.21064e-11	0.0285677	2.16519e-12	7.82724e-13	0.888501	0.23783	13.5201	13.8287	15.5452	15.3575	13.6519	13.9108	15.712	15.8538	13.5354	13.7047	15.3879	15.154
A_52_P499028	71583	9130008F23Rik	RIKEN cDNA 9130008F23 gene	0.246135	1.23295	1.83498	0.0586362	1.00676	1.80203	0.314084	1.41599	2.08989	-0.48091	-0.323192	0.0021052	4.10815e-12	9.03153e-15	0.39527	8.66113e-11	1.19698e-14	0.000256361	4.96226e-13	1.18923e-15	2.35743e-06	0.000194527	10.9338	11.18	12.1668	12.7688	10.6106	10.9247	12.0266	12.7005	10.4529	10.5116	11.4597	12.255
A_55_P2017645	21355	Tap2	transporter 2, ATP-binding cassette, sub-family B (MDR/TAP)	0.428653	2.09883	1.828	0.639921	2.75995	2.42263	0.295037	2.10866	1.63723	-0.656671	0.174236	2.23873e-06	1.72221e-16	1.49528e-15	1.0975e-08	2.32918e-18	1.81155e-17	0.000147481	1.60059e-16	8.33068e-15	7.62579e-09	0.0099784	13.2657	13.6943	15.3645	15.0937	13.4399	13.735	15.5486	15.0772	12.609	13.2489	15.369	15.0317
A_55_P1997300	71804	Mtfr2	mitochondrial fission regulator 2	0.403229	2.03257	1.8275	0.188709	1.71466	1.30724	0.21544	2.05379	2.18689	0.157067	0.231953	4.46526e-05	6.18814e-15	3.22807e-14	0.0193926	8.65333e-14	5.51917e-12	0.00909946	5.26439e-15	1.97823e-15	0.0459848	0.00565982	12.9201	13.3233	14.9526	14.7475	13.152	13.3674	15.2058	15.3389	13.0771	13.2658	14.7918	14.3844
A_55_P1977943	53626	Insm1	insulinoma-associated 1	-0.0571881	0.883211	1.82733	0.0502891	0.48416	1.23456	0.00447249	0.899881	1.20644	-0.0703212	0.0105146	0.48878	8.44205e-09	1.67371e-13	0.541992	1.9212e-05	6.46689e-11	0.95649	6.48093e-09	9.1137e-11	0.396488	0.897962	6.19383	6.13664	7.07704	8.02116	6.20435	6.20882	7.10423	7.41079	6.12351	6.1738	6.60767	7.35807
A_52_P1020860	107350	AW112010	expressed sequence AW112010	0.0736762	2.15619	1.82492	0.192879	2.65575	2.32663	0.155138	2.6437	2.10754	0.867139	-0.120496	0.460483	2.37491e-13	3.05147e-12	0.0652937	9.44423e-15	7.34514e-14	0.130939	1.01358e-14	3.37347e-13	1.44653e-07	0.234046	6.3375	6.41117	8.49368	8.16242	6.217	6.37214	8.8607	8.32454	7.20463	7.39751	9.86038	9.53127
A_55_P2098076	217069	Trim25	tripartite motif-containing 25	0.416477	2.06205	1.82449	0.118737	1.75449	1.41979	0.26308	2.04517	2.25038	0.12823	0.202554	0.000157151	5.39585e-14	3.56282e-13	0.179834	6.49473e-13	1.62239e-11	0.00680784	6.12705e-14	1.39191e-14	0.149352	0.0294031	12.6998	13.1162	14.7618	14.5242	12.9023	13.1654	14.9475	15.1527	12.828	12.9467	14.5825	14.2478
A_55_P2012439	29820	Tnfrsf19	tumor necrosis factor receptor superfamily, member 19	0.005665	0.814471	1.82339	-0.00884979	1.1965	1.72328	-0.0276731	0.861646	1.5853	0.132634	-0.0369084	0.977294	0.000755166	7.96686e-08	0.964537	1.5736e-05	1.70044e-07	0.889458	0.000458132	5.0858e-07	0.508188	0.85297	6.8056	6.81126	7.62007	8.62899	6.76869	6.74102	7.63033	8.35399	6.93823	6.92938	8.13473	8.66151
A_55_P1966719	100042368	Gm3806	predicted gene 3806	0.683739	2.1776	1.82279	0.867241	2.32931	1.96963	0.63596	2.47052	2.00315	-0.239197	-0.0657901	2.24035e-06	1.39181e-13	2.12926e-12	1.03559e-07	4.91709e-14	6.51498e-13	5.39985e-06	1.97513e-14	5.02913e-13	0.022963	0.498687	12.2246	12.9083	14.4022	14.0474	12.1588	12.7948	14.6293	14.162	11.9854	12.8526	14.3147	13.955
A_55_P2169415	70737	Cgn	cingulin	0.0481426	0.348472	1.82235	0.0367792	0.0666834	1.01384	-0.0317694	0.342569	1.66756	-0.0815634	-0.0257916	0.637434	0.00313908	4.79035e-12	0.718409	0.515263	2.53155e-08	0.755317	0.00355316	1.83247e-11	0.427663	0.800166	6.75735	6.80549	7.10582	8.5797	6.73156	6.69979	7.07413	8.39911	6.67579	6.71256	6.74247	7.68962
A_52_P90363	76933	Ifi27l2a	interferon, alpha-inducible protein 27 like 2A	0.0536896	1.24015	1.82116	0.284943	1.7673	2.49074	-0.000341878	0.903347	1.65091	-1.42432	-0.0892333	0.48901	2.36866e-11	6.71063e-14	0.00173676	1.06701e-13	5.13734e-16	0.996457	2.51272e-09	3.04814e-13	2.91753e-12	0.256445	12.4176	12.4712	13.6577	14.2387	12.3283	12.328	13.2317	13.9792	10.9932	11.2782	12.7605	13.484
A_51_P472901	17254	Slc3a2	solute carrier family 3 (activators of dibasic and neutral amino acid transport), member 2	0.0796798	1.12824	1.8206	-0.00149974	0.516514	1.02686	0.303831	1.40018	1.88256	0.627972	-0.28413	0.317852	1.29267e-10	9.0604e-14	0.984755	5.47493e-06	5.17312e-10	0.00120707	5.05783e-12	5.40089e-14	4.79441e-07	0.00206232	14.5561	14.6357	15.6843	16.3766	14.2719	14.5758	15.6721	16.1545	15.184	15.1825	15.7005	16.2109
A_55_P1953361	192196	Luc7l2	LUC7-like 2 (S. cerevisiae)	0.547307	1.95065	1.8204	0.288568	1.64705	1.47408	0.182755	1.4863	1.7339	0.0695679	0.441959	2.62158e-06	2.97744e-14	8.67475e-14	0.00178606	4.05245e-13	2.21309e-12	0.0306689	1.95147e-12	1.83828e-13	0.379988	3.16278e-05	14.6586	15.206	16.6093	16.479	15.1006	15.2834	16.5869	16.8345	14.7282	15.0168	16.3753	16.2023
A_55_P2099890	246103	Atxn7	ataxin 7	0.40225	2.18092	1.82035	0.17867	1.99052	1.53235	0.210909	2.25592	2.32565	0.0362287	0.13635	0.00237231	1.56107e-12	2.41256e-11	0.128446	6.26438e-12	3.12368e-10	0.0766972	9.31063e-13	5.84049e-13	0.749255	0.238805	11.751	12.1532	13.9319	13.5713	11.8873	12.0982	14.1432	14.213	11.7872	11.9659	13.7777	13.3195
A_55_P2040878	22256	Ung	uracil DNA glycosylase	0.342912	2.06909	1.81697	0.105287	1.75135	1.43259	0.289792	2.17711	2.26735	0.121463	0.180709	0.00799957	4.39284e-12	3.12181e-11	0.365895	5.41306e-11	1.0447e-09	0.0209927	2.02519e-12	1.08931e-12	0.298963	0.129857	12.9893	13.3322	15.0584	14.8062	13.17	13.4598	15.3471	15.4373	13.1107	13.216	14.8621	14.5433
A_55_P1990944	12362	Casp1	caspase 1	0.181567	1.93741	1.81408	0.0768447	1.65235	1.76536	0.0452664	1.91272	1.78302	0.876218	0.0999879	0.0572133	2.84217e-13	7.80023e-13	0.398414	3.24401e-12	1.183e-12	0.616238	3.46176e-13	1.01596e-12	3.44455e-08	0.275593	7.02856	7.21013	8.96597	8.84264	7.12855	7.17382	9.04127	8.91157	7.90478	7.98162	9.55713	9.67014
A_55_P2033362	13654	Egr2	early growth response 2	0.581427	1.53941	1.81381	-0.0796522	0.427117	0.35049	0.657421	2.04222	1.97602	0.729681	-0.184669	3.59185e-06	4.25146e-12	3.46638e-13	0.357089	0.000112984	0.000729212	7.7707e-07	5.56585e-14	9.26314e-14	1.99811e-07	0.0430578	10.1698	10.7513	11.7092	11.9836	9.98516	10.6426	12.0274	11.9612	10.8995	10.8199	11.3266	11.25
A_55_P2097161	74482	Ifitm7	interferon induced transmembrane protein 7	0.324095	2.05283	1.81208	0.200501	1.85948	1.49652	0.29214	2.25222	2.31353	0.0275142	0.1125	0.00575222	9.66363e-13	6.45856e-12	0.0661578	4.36573e-12	1.13983e-10	0.0110692	2.32956e-13	1.54022e-13	0.790053	0.284734	12.4343	12.7584	14.4872	14.2464	12.5468	12.839	14.7991	14.8604	12.4619	12.6624	14.3213	13.9584
A_55_P2169417	545551	BC021767	cingulin pseudogene	0.0714624	0.591838	1.80944	0.0230706	0.0424969	0.885719	0.143851	0.338912	1.54637	-0.0324588	0.0562414	0.648715	0.00144906	3.05397e-09	0.882729	0.786013	3.05681e-05	0.363959	0.042807	2.79065e-08	0.835646	0.719612	6.67743	6.74889	7.26926	8.48687	6.73367	6.87752	7.07258	8.28004	6.64497	6.66804	6.68746	7.53069
A_52_P177373	380614	Intu	inturned planar cell polarity effector homolog (Drosophila)	-0.0607206	0.861224	1.80863	-0.0869563	0.306407	0.841073	-0.109018	0.998334	1.30177	-0.0233391	0.13387	0.493371	3.21812e-08	5.81281e-13	0.330408	0.00276613	4.45607e-08	0.226301	4.0467e-09	8.41557e-11	0.791021	0.141868	7.75252	7.6918	8.61375	9.56116	7.88639	7.77738	8.88473	9.18817	7.72919	7.64223	8.03559	8.57026
A_55_P1978506	110557	H2-Q6	histocompatibility 2, Q region locus 6	0.041565	1.24831	1.80685	0.205859	1.62581	2.26064	0.126312	1.46706	2.00252	-0.739069	-0.106539	0.610522	4.81656e-11	1.74242e-13	0.0205152	8.81926e-13	5.41206e-15	0.134072	4.22531e-12	3.55761e-14	8.79173e-08	0.201746	13.2735	13.315	14.5218	15.0803	13.1669	13.2932	14.634	15.1694	12.5344	12.7402	14.1602	14.795
A_55_P1972915	627369	Gm6748	predicted gene 6748	0.451788	1.89814	1.80401	0.19243	1.62872	1.38955	0.189221	1.77472	2.01776	0.0557335	0.290655	5.63548e-06	6.17724e-15	1.36233e-14	0.0118837	6.64206e-14	7.65475e-13	0.0131013	1.75662e-14	2.38381e-15	0.422852	0.000571882	13.946	14.3978	15.8441	15.75	14.2366	14.4259	16.0114	16.2544	14.0017	14.1942	15.6304	15.3913
A_51_P343429	67712	Slc25a37	solute carrier family 25, member 37	0.313507	1.29264	1.80377	0.248992	1.178	1.56094	0.381429	1.70676	2.04587	0.0761659	-0.0577263	0.000490803	5.63171e-12	3.39017e-14	0.00321708	2.28806e-11	3.15909e-13	7.25015e-05	7.97486e-14	4.79167e-15	0.304871	0.433489	13.1705	13.484	14.4631	14.9742	13.1127	13.4942	14.8195	15.1586	13.2466	13.4956	14.4246	14.8076
A_55_P2120388	328505	Skint7	selection and upkeep of intraepithelial T cells 7	0.388331	1.89648	1.80058	0.206722	1.60124	1.42788	0.227322	1.91443	2.04381	0.00700148	0.23534	0.000151079	6.27499e-14	1.39835e-13	0.0182758	8.48631e-13	4.86783e-12	0.010676	5.4242e-14	1.9691e-14	0.930125	0.00864038	14.0571	14.4454	15.9536	15.8577	14.2925	14.5198	16.2069	16.3363	14.0641	14.2708	15.6654	15.492
A_55_P2029235	12231	Btn1a1	butyrophilin, subfamily 1, member A1	0.444222	2.06005	1.80043	0.193521	1.7744	1.40518	0.192944	1.98916	2.21771	0.131609	0.262836	9.53299e-05	6.90485e-14	5.49746e-13	0.0387817	6.87241e-13	2.37443e-11	0.0392926	1.18584e-13	2.20366e-14	0.145177	0.00754152	12.0523	12.4965	14.1123	13.8527	12.3151	12.5081	14.3043	14.5329	12.1839	12.3774	13.9583	13.5891
A_55_P2011727	240055	Neurl1b	neuralized homolog 1b (Drosophila)	0.379984	2.02289	1.79831	0.171526	1.77274	1.41825	0.204531	2.05568	2.19021	0.0810021	0.21565	0.00055015	1.37057e-13	8.36353e-13	0.0696899	1.04125e-12	3.06216e-11	0.0340404	1.06942e-13	4.0133e-14	0.372045	0.0265153	12.6981	13.0781	14.721	14.4964	12.9137	13.1183	14.9694	15.104	12.7791	12.9506	14.5518	14.1973
A_55_P1969078	56417	Adar	adenosine deaminase, RNA-specific	0.691106	1.93956	1.79778	0.802602	2.03979	1.96263	0.514568	1.96476	1.8376	-0.107932	0.0697353	1.1748e-08	2.12639e-15	6.93894e-15	1.39269e-09	9.68178e-16	1.76801e-15	6.27536e-07	1.73834e-15	4.93404e-15	0.114588	0.296802	12.5196	13.2107	14.4592	14.3174	12.5894	13.1039	14.5541	14.427	12.4117	13.2143	14.4515	14.3743
A_55_P2125049	100529082	Gm11127	predicted gene 11127	0.0951827	1.22858	1.79767	0.272644	1.7906	2.42319	0.184131	1.18059	1.53857	-0.812772	0.07006	0.272114	1.18929e-10	3.75268e-13	0.00497269	3.98681e-13	3.68506e-15	0.0429005	2.14441e-10	4.04755e-12	4.43401e-08	0.414774	14.1275	14.2227	15.3561	15.9251	14.1975	14.3817	15.3781	15.7361	13.3147	13.5873	15.1053	15.7379
A_52_P214630	20682	Sox9	SRY (sex determining region Y)-box 9	-0.00144288	1.91835	1.79634	-0.0481233	1.47122	1.07595	-0.261771	2.03588	2.25034	0.178161	0.178936	0.986329	1.19725e-13	3.29403e-13	0.569688	6.93925e-12	7.30622e-10	0.00614401	4.77602e-14	1.01007e-14	0.0473913	0.0465475	7.93348	7.93203	9.85182	9.72981	8.11241	7.85064	10.1483	10.3628	8.11164	8.06351	9.58285	9.18759
A_52_P495553	229055	Zbtb10	zinc finger and BTB domain containing 10	0.0613528	0.71001	1.796	-0.113492	0.413307	0.93557	-0.137323	0.903928	1.66001	0.195874	0.183896	0.421743	5.65192e-08	6.22929e-14	0.14679	4.48417e-05	1.15667e-09	0.0836397	1.90177e-09	2.09962e-13	0.0181779	0.0251519	9.13346	9.19481	9.84347	10.9295	9.31736	9.18003	10.2213	10.9774	9.32934	9.21584	9.74264	10.2649
A_51_P488739	80885	Niacr1	niacin receptor 1	0.479388	2.20963	1.79512	0.559608	2.28904	2.20829	0.311417	2.06839	1.84027	0.328228	0.0411677	0.000345323	5.73488e-13	1.35332e-11	7.48542e-05	3.33492e-13	5.78838e-13	0.00955817	1.57569e-12	9.30119e-12	0.00686467	0.702128	7.32875	7.80813	9.53837	9.12387	7.36991	7.68133	9.4383	9.21018	7.65697	8.21658	9.94601	9.86526
A_55_P2109613	11622	Ahr	aryl-hydrocarbon receptor	0.190064	0.807367	1.79441	-0.0632912	0.271946	1.2731	0.134676	1.12978	2.0418	-0.132646	0.0366731	0.0337558	3.56332e-08	2.72663e-13	0.450409	0.00433021	5.0007e-11	0.119302	2.93922e-10	3.71255e-14	0.12455	0.659938	11.1786	11.3687	11.986	12.9731	11.2153	11.35	12.3451	13.2571	11.046	10.9827	11.3179	12.3191
A_51_P223776	217166	Nr1d1	nuclear receptor subfamily 1, group D, member 1	-0.319303	0.580666	1.7923	-0.0340125	0.560705	1.37323	-0.138321	0.7543	2.07304	-0.338834	-0.522011	0.00345174	1.22286e-05	1.9906e-12	0.719441	1.82281e-05	1.09943e-10	0.156597	4.93922e-07	2.14027e-13	0.00221907	4.02248e-05	9.39242	9.07312	9.97309	11.1847	8.87041	8.73209	9.62471	10.9434	9.05359	9.01958	9.61429	10.4268
A_55_P2102365	216873	Spag7	sperm associated antigen 7	0.425823	1.86078	1.79136	0.235279	1.63286	1.43635	0.222565	1.70573	1.95601	0.00557542	0.271148	6.49221e-07	2.19627e-16	3.98333e-16	0.000468679	1.6949e-15	1.24871e-14	0.000766704	8.56955e-16	1.00446e-16	0.918509	0.00012014	14.8043	15.2301	16.665	16.5956	15.0754	15.298	16.7811	17.0314	14.8098	15.0451	16.4427	16.2462
A_51_P308446	73545	1700094D03Rik	RIKEN cDNA 1700094D03 gene	0.21024	0.932203	1.79058	0.0663094	0.560096	1.12749	0.220816	0.832049	1.39239	0.0256163	0.136307	0.00197614	2.29395e-11	9.98008e-16	0.260721	3.66277e-08	1.28312e-12	0.00133681	1.25193e-10	4.993e-14	0.658398	0.0291813	9.68029	9.89053	10.6125	11.4709	9.8166	10.0374	10.6486	11.209	9.70591	9.77221	10.266	10.8334
A_55_P1996212	381990	Zbtb2	zinc finger and BTB domain containing 2	0.14535	0.788728	1.78941	-0.0284332	0.133688	0.928852	0.0469111	0.167024	1.72263	0.172073	-0.0898786	0.231017	4.80486e-06	6.2552e-11	0.810622	0.268946	6.28367e-07	0.693051	0.171758	1.10157e-10	0.159905	0.452501	10.6685	10.8139	11.4572	12.4579	10.5786	10.6255	10.7457	12.3013	10.8406	10.8122	10.9743	11.7694
A_55_P2435563	208618	Etl4	enhancer trap locus 4	0.113703	1.74984	1.78743	0.161448	1.42265	1.16089	0.0710414	1.88857	1.42854	-0.0588033	0.0195666	0.345065	8.88465e-11	6.47378e-11	0.186173	1.84566e-09	3.25614e-08	0.551764	2.84193e-11	1.73906e-09	0.62167	0.869115	7.59008	7.70378	9.33991	9.37751	7.60965	7.68069	9.49822	9.03818	7.53128	7.69272	8.95393	8.69217
A_55_P2043734	382253	Cdkl5	cyclin-dependent kinase-like 5	0.16762	1.7822	1.78575	0.158407	1.47279	1.15624	0.0938629	1.47608	1.5613	0.101231	-0.00413493	0.071158	7.37193e-13	7.1505e-13	0.0864652	1.33957e-11	4.89883e-10	0.294999	1.29519e-11	5.5422e-12	0.260061	0.962544	6.68933	6.85695	8.47153	8.47508	6.6852	6.77906	8.16128	8.24649	6.79056	6.94897	8.26335	7.9468
A_51_P323812	14411	Slc6a12	solute carrier family 6 (neurotransmitter transporter, betaine/GABA), member 12	0.0545761	0.343153	1.78485	-0.0585585	-0.223088	0.93957	0.0452564	0.257953	2.05434	0.796834	-0.0785337	0.572283	0.00230091	2.76497e-12	0.544894	0.0316153	3.29721e-08	0.639059	0.0150581	3.21591e-13	3.03142e-07	0.41899	7.24757	7.30214	7.59072	9.03242	7.16903	7.21429	7.42699	9.22337	8.0444	7.98584	7.82131	8.98397
A_55_P1966833	327959	Xaf1	XIAP associated factor 1	0.426198	1.57208	1.78427	0.567913	1.75042	1.98126	0.37397	1.6569	1.41002	-0.529463	0.002371	1.85932e-05	2.27901e-13	3.2239e-14	5.71473e-07	4.33751e-14	6.33949e-15	7.6895e-05	1.01375e-13	1.20956e-12	1.39428e-06	0.973712	13.6302	14.0564	15.2023	15.4145	13.6326	14.0065	15.2895	15.0426	13.1007	13.6686	14.8511	15.082
A_51_P505662	71275	Noxred1	NADP+ dependent oxidoreductase domain containing 1	0.268144	1.02584	1.78306	0.388934	0.838863	1.27018	0.0915637	0.653021	1.30728	-0.208666	0.0802792	0.0199411	3.42981e-08	1.11076e-11	0.00176022	5.05924e-07	1.67962e-09	0.390144	1.09806e-05	1.10738e-09	0.0613522	0.449944	8.14274	8.41088	9.16858	9.9258	8.22302	8.31458	8.87604	9.5303	7.93407	8.32301	8.77294	9.20425
A_55_P1988384	11989	Slc7a3	solute carrier family 7 (cationic amino acid transporter, y+ system), member 3	0.164111	0.925883	1.78255	0.140504	0.213151	0.719916	0.15334	0.793175	1.42353	1.13204	0.0777724	0.16297	3.92308e-07	3.66584e-11	0.228487	0.0757243	8.86318e-06	0.19066	2.77737e-06	1.01399e-09	2.62398e-08	0.498104	8.76952	8.93363	9.6954	10.5521	8.84729	9.00063	9.64046	10.2708	9.90156	10.0421	10.1147	10.6215
A_55_P2067463	73549	1700110I01Rik	RIKEN cDNA 1700110I01 gene	0.382262	2.03238	1.78002	0.212483	1.74048	1.36117	0.104434	1.86298	1.95951	0.0633259	0.300245	0.00392554	5.97025e-12	4.3967e-11	0.0794494	6.14963e-11	2.26132e-09	0.370774	2.22075e-11	1.03738e-11	0.584266	0.017626	10.987	11.3693	13.0194	12.767	11.2873	11.3917	13.1503	13.2468	11.0503	11.2628	12.7908	12.4115
A_51_P510418	72535	Aldh1b1	aldehyde dehydrogenase 1 family, member B1	0.237195	2.69456	1.77962	0.291146	3.11538	2.71827	0.255723	2.89356	2.19982	-0.167803	-0.104182	0.00939938	3.699e-16	2.33194e-13	0.00229931	3.80093e-17	3.22495e-16	0.00580991	1.2114e-16	8.76823e-15	0.053106	0.213018	9.1794	9.41659	11.874	10.959	9.07522	9.33094	11.9688	11.275	9.0116	9.30274	12.127	11.7299
A_51_P440865	242297	Fam110b	family with sequence similarity 110, member B	-0.110682	1.76808	1.77839	-0.0494128	1.26156	0.959288	0.0276469	1.62056	1.30539	0.184912	-0.112883	0.171326	1.42038e-13	1.29861e-13	0.531522	2.43591e-11	1.38963e-09	0.725138	5.42476e-13	1.4571e-11	0.0294009	0.163461	9.83188	9.72119	11.6	11.6103	9.71899	9.74664	11.3396	11.0244	10.0168	9.96738	11.2783	10.9761
A_55_P2108165	628705	Phf11c	PHD finger protein 11C	0.381526	2.00606	1.77725	0.281622	2.10643	1.81785	0.366171	2.23609	2.16964	0.122578	-0.11698	0.00107724	5.48584e-13	3.48757e-12	0.00961796	2.59111e-13	2.47333e-12	0.00150822	1.03196e-13	1.64344e-13	0.218625	0.239394	6.8151	7.19662	8.82115	8.59235	6.69812	7.06429	8.9342	8.86776	6.93768	7.2193	9.04411	8.75552
A_55_P2043117	76138	Ccdc138	coiled-coil domain containing 138	0.458091	1.87561	1.7751	0.191333	1.6349	1.37005	0.170065	1.76395	2.02487	0.0701695	0.320326	8.5025e-06	1.58487e-14	3.72344e-14	0.0161783	1.32823e-13	1.99862e-12	0.0295453	4.10516e-14	4.81788e-15	0.338629	0.000367957	14.1317	14.5898	16.0073	15.9068	14.452	14.6221	16.216	16.4769	14.2018	14.3932	15.8367	15.5719
A_55_P1978511	15018	H2-Q7	histocompatibility 2, Q region locus 7	-0.04294	1.10318	1.77508	0.141788	1.53133	2.24645	0.132781	1.35199	1.69627	-0.724337	-0.0887125	0.553758	5.11384e-11	3.61197e-14	0.0632082	3.52912e-13	9.24431e-16	0.0799536	2.37409e-12	7.29361e-14	2.25079e-08	0.229485	14.9893	14.9463	16.0925	16.7644	14.9006	15.0333	16.2526	16.5968	14.2649	14.4067	15.7963	16.5114
A_55_P2177463	434198	B130024G19Rik	RIKEN cDNA B130024G19 gene	-0.0777895	1.17347	1.77367	0.283927	1.23874	1.52919	0.00801763	0.680546	1.67948	-0.70127	-0.121924	0.628901	1.49517e-06	5.82481e-09	0.0911192	7.53695e-07	4.61172e-08	0.960125	0.000547879	1.2576e-08	0.000417603	0.45123	8.67341	8.59562	9.84688	10.4471	8.55149	8.5595	9.23203	10.231	7.97214	8.25607	9.21088	9.50133
A_55_P2276224	320377	9330175E14Rik	RIKEN cDNA 9330175E14 gene	1.21399	2.41873	1.77319	1.44718	2.87809	2.3381	0.968659	2.12466	1.3751	-0.586676	0.0741222	1.4363e-09	4.41767e-14	5.17022e-12	1.09275e-10	2.96322e-15	7.46394e-14	3.49089e-08	3.26435e-13	2.327e-10	1.96721e-05	0.460447	8.19554	9.40953	10.6143	9.96873	8.26966	9.23832	10.3943	9.64476	7.60886	9.05604	10.487	9.94696
A_55_P2103661	238803	Zfp366	zinc finger protein 366	0.0112516	1.30305	1.77232	0.157421	1.50895	1.51641	0.0817462	1.5742	1.86876	-0.0999449	-0.155846	0.879549	6.44882e-12	5.78752e-14	0.0469115	6.89337e-13	6.39118e-13	0.279849	3.60007e-13	2.5474e-14	0.190389	0.0488936	6.75483	6.76608	8.05787	8.52715	6.59898	6.68073	8.17318	8.46775	6.65488	6.8123	8.16383	8.1713
A_55_P2035946	18619	Penk	preproenkephalin	0.183515	0.989255	1.77133	0.405421	0.752744	1.31348	0.02339	1.106	2.47096	0.686686	0.287929	0.177031	1.10316e-06	3.55085e-10	0.00663626	2.83192e-05	2.55495e-08	0.859377	2.61291e-07	2.42133e-12	7.59332e-05	0.041618	10.5418	10.7253	11.5311	12.3131	10.8297	10.8531	11.9357	13.3007	11.2285	11.6339	11.9812	12.542
A_55_P2030761	100039193	Gm2091	predicted gene 2091	0.412976	2.01828	1.77127	0.233018	1.79034	1.44334	0.274139	1.9942	2.24952	0.114797	0.231943	0.000423149	3.27242e-13	2.41337e-12	0.0236352	2.04995e-12	5.30328e-11	0.00958052	3.93534e-13	6.1443e-14	0.235477	0.0241889	12.3172	12.7301	14.3355	14.0884	12.5491	12.8233	14.5433	14.7986	12.432	12.665	14.2223	13.8753
A_55_P2074636	231821	Adap1	ArfGAP with dual PH domains 1	-0.0299506	1.03135	1.76948	0.0857898	0.730634	1.2665	-0.00067508	0.532009	1.58383	0.295019	0.098746	0.713237	8.14171e-10	2.42797e-13	0.299872	1.03532e-07	3.91712e-11	0.993376	5.87333e-06	1.32883e-12	0.0020282	0.235319	9.42889	9.39894	10.4602	11.1984	9.52764	9.52696	10.0596	11.1115	9.72391	9.8097	10.4545	10.9904
A_55_P2008016	70882	Armc3	armadillo repeat containing 3	-0.0533424	1.78736	1.76932	0.734071	2.70228	2.57882	0.314255	1.91902	1.99627	-0.1165	-0.171066	0.826823	1.44877e-06	1.64472e-06	0.00752655	5.59906e-09	1.08396e-08	0.208733	5.87046e-07	3.51779e-07	0.63377	0.486024	6.52417	6.47083	8.31153	8.29348	6.3531	6.66736	8.27212	8.34937	6.40767	7.14174	9.10995	8.98649
A_55_P2048650	102442	Dennd4a	DENN/MADD domain containing 4A	0.447071	1.81784	1.76447	0.193433	1.62381	1.41153	0.208581	1.82125	2.05297	0.0602226	0.311653	5.24489e-05	2.17614e-13	3.44157e-13	0.0308774	1.22961e-12	1.03398e-11	0.0213121	2.11414e-13	3.3238e-14	0.471556	0.00153907	14.6646	15.1117	16.4824	16.4291	14.9763	15.1848	16.7975	17.0292	14.7248	14.9183	16.3486	16.1364
A_66_P126153	75443	1700011M02Rik	RIKEN cDNA 1700011M02 gene	-0.00621878	1.30079	1.76159	0.0210052	1.30911	1.66372	0.0335652	1.41815	1.28244	-0.0364347	0.00904954	0.934192	8.24802e-12	7.95749e-14	0.780566	7.48919e-12	1.92196e-13	0.656828	2.22168e-12	1.02235e-11	0.629801	0.90437	6.32952	6.3233	7.63031	8.09111	6.33857	6.37214	7.75672	7.62101	6.29309	6.31409	7.6022	7.95681
A_55_P2148609	669454	Gm9460	predicted gene 9460	0.213602	1.42001	1.75962	0.121423	0.924533	1.27833	0.182283	1.23552	1.99761	-0.204195	-0.00114523	0.0924662	2.55734e-09	1.11418e-10	0.324023	8.83956e-07	1.13787e-08	0.1462	1.83233e-08	1.67131e-11	0.106429	0.99246	9.09095	9.30455	10.511	10.8506	9.08981	9.27209	10.3253	11.0874	8.88676	9.00818	9.81129	10.1651
A_55_P1953866	20353	Sema4c	sema domain, immunoglobulin domain (Ig), transmembrane domain (TM) and short cytoplasmic domain, (semaphorin) 4C	0.306813	1.87581	1.75634	0.196389	1.65375	1.4382	0.219604	2.04741	2.13594	0.0524331	0.239267	0.0038498	6.80636e-13	1.86156e-12	0.0460661	4.65184e-12	3.82086e-11	0.0279095	1.77293e-13	9.2275e-14	0.571519	0.0180481	13.5179	13.8247	15.3937	15.2742	13.7572	13.9768	15.8046	15.8931	13.5703	13.7667	15.2241	15.0085
A_52_P533146	13198	Ddit3	DNA-damage inducible transcript 3	0.187003	0.85097	1.7562	0.0536717	0.600655	1.60031	0.28171	0.418075	1.81823	0.149902	0.0798599	0.417187	0.00162557	7.84004e-07	0.814096	0.0166663	2.51472e-06	0.227678	0.081175	5.01758e-07	0.51388	0.726712	12.5961	12.7831	13.4471	14.3523	12.676	12.9577	13.0941	14.4942	12.746	12.7997	13.3467	14.3464
A_52_P441954	18426	Ovol1	OVO homolog-like 1 (Drosophila)	0.337202	2.16658	1.75348	0.664235	1.11896	0.746825	0.263071	2.45227	1.90689	0.0153287	-0.070149	0.164182	7.24332e-08	1.16128e-06	0.0111098	0.000185239	0.00527873	0.272029	1.31165e-08	3.96e-07	0.947961	0.765494	6.31168	6.64888	8.47826	8.06515	6.24153	6.5046	8.6938	8.14842	6.32701	6.99124	7.44597	7.07383
A_51_P499838	12182	Bst1	bone marrow stromal cell antigen 1	0.124724	1.29848	1.75345	0.0461414	1.25158	1.66736	0.0867307	1.06382	1.63008	0.937107	-0.0906373	0.317329	1.08945e-08	1.4139e-10	0.707554	1.82306e-08	2.97282e-10	0.483215	1.67243e-07	4.14352e-10	8.73231e-07	0.464051	7.1528	7.27752	8.45128	8.90624	7.06216	7.14889	8.12597	8.69224	8.0899	8.13604	9.34148	9.75726
A_51_P206134	100182	Akna	AT-hook transcription factor	0.136015	0.610048	1.75284	0.102984	0.273635	1.14407	0.128108	0.791183	1.72383	0.331433	-0.0321328	0.0360226	2.04869e-08	2.74092e-15	0.102229	0.000296972	1.99213e-12	0.0466506	4.98462e-10	3.55535e-15	4.26475e-05	0.595907	8.85415	8.99016	9.46419	10.607	8.82201	8.95012	9.6132	10.5458	9.18558	9.28856	9.45921	10.3297
A_55_P2027052	213389	Prdm9	PR domain containing 9	0.0834607	1.59265	1.74886	0.12438	1.74157	1.96325	0.123121	1.82303	1.89077	-0.141864	-0.118151	0.537587	2.21204e-09	5.69702e-10	0.361781	6.05533e-10	1.03655e-10	0.366533	3.09904e-10	1.80988e-10	0.300168	0.385711	7.63862	7.72208	9.23127	9.38747	7.52047	7.64359	9.3435	9.41123	7.49675	7.62113	9.23832	9.46
A_55_P2088401	15051	H2-T9	histocompatibility 2, T region locus 9	0.354336	1.76347	1.74738	0.519443	2.32533	2.60388	0.528254	1.93838	1.76295	-0.648022	-0.0547837	0.000241786	9.85734e-14	1.13562e-13	3.72293e-06	1.34162e-15	2.28598e-16	3.03416e-06	2.28103e-14	9.90298e-14	2.24829e-07	0.477177	12.1149	12.4693	13.8784	13.8623	12.0602	12.5884	13.9985	13.8231	11.4669	11.9864	13.7922	14.0708
A_55_P2088296	239170	Fam160b2	family with sequence similarity 160, member B2	0.436379	1.97071	1.74668	0.207247	1.68141	1.33324	0.25484	1.8803	2.16521	0.0455276	0.245095	0.000505279	1.48056e-12	9.26467e-12	0.0555514	1.64589e-11	5.17081e-10	0.0219191	3.02903e-12	3.50075e-13	0.656063	0.0266329	13.1642	13.6006	15.1349	14.9109	13.4093	13.6641	15.2896	15.5745	13.2097	13.417	14.8911	14.543
A_52_P530291	18712	Pim1	proviral integration site 1	-0.000879835	1.46707	1.74639	-0.368816	1.13993	0.816353	0.080105	2.10197	2.26727	0.817174	0.12502	0.995437	4.61085e-08	4.02478e-09	0.0270597	1.2783e-06	6.18725e-05	0.60415	2.73742e-10	8.92977e-11	6.12192e-05	0.421295	8.38722	8.38634	9.85429	10.1336	8.51224	8.59234	10.6142	10.7795	9.20439	8.83557	10.3443	10.0207
A_55_P2054332	13845	Ephb3	Eph receptor B3	0.395657	1.93066	1.74579	0.269588	1.71056	1.4105	0.199339	1.9268	2.06767	0.107516	0.259943	0.000468512	3.97888e-13	1.85752e-12	0.00873904	2.5344e-12	4.66071e-11	0.0421422	4.10324e-13	1.38509e-13	0.250752	0.0109077	13.1182	13.5139	15.0489	14.864	13.3782	13.5775	15.305	15.4458	13.2257	13.4953	14.9363	14.6362
A_55_P2097474	231991	Creb5	cAMP responsive element binding protein 5	0.481135	1.83412	1.74522	0.278865	1.66933	1.49719	0.091438	1.74637	1.96413	0.0784748	0.431069	8.52873e-05	1.19092e-12	2.54156e-12	0.00802669	4.99583e-12	2.58283e-11	0.335374	2.51637e-12	4.17034e-13	0.406536	0.000254627	14.244	14.7251	16.0781	15.9892	14.6751	14.7665	16.4214	16.6392	14.3225	14.6013	15.9918	15.8197
A_51_P469968	14991	H2-M3	histocompatibility 2, M region locus 3	0.471283	2.11831	1.74441	0.439057	2.50646	2.13337	0.303947	2.11464	1.66185	-0.327818	0.237735	3.80082e-06	1.29343e-15	2.65736e-14	8.83027e-06	9.28738e-17	1.15795e-15	0.00041587	1.32892e-15	5.63042e-14	0.000203583	0.00314943	10.2634	10.7347	12.3817	12.0078	10.5011	10.8051	12.6157	12.163	9.93555	10.3746	12.442	12.0689
A_51_P448618	72472	Slc16a10	solute carrier family 16 (monocarboxylic acid transporters), member 10	-0.0274653	1.02791	1.7433	-0.0303068	0.999098	1.65001	-0.0392422	1.25242	1.83823	0.318991	-0.14382	0.683431	5.09697e-11	1.592e-14	0.652918	7.7889e-11	3.73577e-14	0.561225	2.58592e-12	6.98233e-15	0.000191345	0.0451027	7.76111	7.73364	8.78902	9.50441	7.61729	7.57804	8.86971	9.45552	8.0801	8.04979	9.0792	9.73011
A_55_P2082614	244556	Zfp791	zinc finger protein 791	0.400777	2.04264	1.74123	0.317938	1.8374	1.46121	0.189717	1.94037	2.21688	0.191884	0.388149	0.000779855	4.93562e-13	5.6402e-12	0.0047041	2.49163e-12	7.8673e-11	0.067744	1.08413e-12	1.40089e-13	0.0649721	0.00102424	11.0813	11.482	13.1239	12.8225	11.4694	11.6591	13.4098	13.6863	11.2732	11.5911	13.1106	12.7344
A_51_P237754	15040	H2-T23	histocompatibility 2, T region locus 23	0.0187871	1.14227	1.74122	0.188127	1.69019	2.39379	0.13063	1.36486	1.69482	-0.871742	0.0155986	0.783266	1.31904e-11	2.06119e-14	0.0128806	3.26896e-14	1.43589e-16	0.0696833	8.80966e-13	3.13336e-14	7.29561e-10	0.819282	14.6484	14.6672	15.7907	16.3896	14.664	14.7946	16.0289	16.3588	13.7767	13.9648	15.4669	16.1705
A_51_P257419	16870	Lhx2	LIM homeobox protein 2	0.167625	2.42841	1.74079	0.125152	2.72404	1.60869	-0.0126547	2.62271	1.60993	0.277765	0.187888	0.101243	3.19768e-14	5.29467e-12	0.2125	5.3678e-15	1.74506e-11	0.897149	9.68171e-15	1.72493e-11	0.0108873	0.0690527	6.40035	6.56797	8.82875	8.14114	6.58823	6.57558	9.21094	8.19816	6.67811	6.80326	9.40215	8.2868
A_55_P2100620	622459	Gm12216	predicted gene 12216	0.52776	2.40307	1.73971	0.75483	2.87402	2.26227	0.686732	2.59478	2.11844	-0.135842	0.214177	0.000343958	6.87031e-13	9.07679e-11	7.79712e-06	4.35979e-14	1.72955e-12	2.30527e-05	2.11293e-13	4.70015e-12	0.260158	0.0843779	7.72288	8.25064	10.1259	9.46259	7.93705	8.62379	10.5318	10.0555	7.58703	8.34186	10.4611	9.84931
A_51_P493857	23924	Katna1	katanin p60 (ATPase-containing) subunit A1	0.1565	2.06469	1.73946	0.227403	2.01961	1.36217	0.311064	2.46427	1.95268	0.0264809	-0.090712	0.0514258	7.01102e-15	9.99598e-14	0.00752223	9.88255e-15	4.23473e-12	0.000708889	4.43286e-16	1.66833e-14	0.726186	0.239887	11.7479	11.9044	13.8126	13.4873	11.6572	11.9682	14.1214	13.6098	11.7744	12.0018	13.794	13.1365
A_55_P1966372	218543	Srek1	splicing regulatory glutamine/lysine-rich protein 1	0.419235	1.94269	1.73814	0.0978787	1.64914	1.32534	0.220357	1.85423	2.06935	0.129736	0.242841	1.81286e-05	6.4334e-15	3.62024e-14	0.178405	8.16359e-14	2.33904e-12	0.0059919	1.32787e-14	2.40475e-15	0.0805876	0.00303825	13.0004	13.4196	14.9431	14.7385	13.2432	13.4636	15.0975	15.3126	13.1301	13.228	14.7793	14.4555
A_55_P2063166	270086	Ogfod1	2-oxoglutarate and iron-dependent oxygenase domain containing 1	0.411006	1.91225	1.73742	0.216686	1.68131	1.39711	0.111157	1.98196	2.10051	0.0248645	0.243978	0.000114363	8.64803e-14	3.78806e-13	0.016579	6.26953e-13	1.05074e-11	0.188565	4.97118e-14	2.02074e-14	0.762587	0.00826961	13.0689	13.4799	14.9811	14.8063	13.3128	13.424	15.2948	15.4133	13.0937	13.3104	14.775	14.4908
A_55_P1992680	21429	Ubtf	upstream binding transcription factor, RNA polymerase I	0.395141	1.87136	1.7362	0.223117	1.63085	1.40452	0.199295	1.72913	1.93992	-0.029974	0.248108	7.96431e-05	3.81019e-14	1.2142e-13	0.0090664	3.18407e-13	3.12985e-12	0.0174154	1.29306e-13	2.18133e-14	0.695079	0.0045228	14.3885	14.7837	16.2599	16.1247	14.6366	14.8359	16.3658	16.5766	14.3586	14.5817	15.9894	15.7631
A_51_P294555	213002	Ifitm6	interferon induced transmembrane protein 6	0.169689	1.60916	1.73606	0.195414	1.93652	2.4828	0.263603	2.03079	1.75598	-0.364311	-0.026161	0.107829	2.84833e-11	9.07955e-12	0.0674688	1.72639e-12	3.77662e-14	0.017651	8.34874e-13	7.64004e-12	0.00214463	0.796122	7.44006	7.60975	9.04922	9.17611	7.4139	7.6775	9.44469	9.16988	7.07574	7.27116	9.01227	9.55855
A_52_P672689	12223	Btc	betacellulin, epidermal growth factor family member	0.433306	2.333	1.73585	0.110499	2.05595	1.3249	0.0440902	1.96527	2.99968	0.163961	-0.085025	0.0589556	8.33986e-09	4.62332e-07	0.611018	4.83577e-08	1.27236e-05	0.838618	8.92904e-08	2.20499e-10	0.452668	0.695033	6.73548	7.16879	9.06848	8.47133	6.65046	6.69455	8.61573	9.65013	6.89944	7.00994	8.9554	8.22434
A_51_P464703	20307	Ccl8	chemokine (C-C motif) ligand 8	-0.0650056	1.46614	1.73517	0.407687	3.44057	4.36099	0.111828	2.19011	2.5849	-1.37004	-0.123101	0.539487	2.07281e-10	1.6793e-11	0.0012057	4.38971e-16	1.06406e-17	0.296779	4.86116e-13	3.77344e-14	5.61045e-10	0.252463	10.176	10.111	11.6422	11.9112	10.0529	10.1648	12.2431	12.6378	8.806	9.21369	12.2466	13.167
A_51_P491976	109082	Fbxw17	F-box and WD-40 domain protein 17	0.564404	1.77028	1.73433	0.444619	1.5673	1.55987	0.32505	1.57531	1.26851	-0.376665	0.0226805	8.57644e-06	9.77162e-13	1.33713e-12	0.000116625	6.24323e-12	6.70907e-12	0.00193952	5.77897e-12	1.48704e-10	0.00056624	0.799235	13.3502	13.9146	15.1205	15.0845	13.3729	13.6979	14.9482	14.6414	12.9735	13.4181	14.5408	14.5334
A_52_P144925	75316	Taf1d	TATA box binding protein (Tbp)-associated factor, RNA polymerase I, D	0.346591	1.2438	1.73418	0.0760929	0.677157	1.01469	0.29141	1.05771	1.75219	0.201911	0.0628619	0.000904975	1.28816e-10	8.545e-13	0.384886	6.35803e-07	2.51852e-09	0.00352962	1.38441e-09	7.29495e-13	0.0307443	0.471155	11.1337	11.4803	12.3775	12.8679	11.1966	11.488	12.2543	12.9488	11.3357	11.4117	12.0128	12.3503
A_55_P1995045	78781	Zc3hav1	zinc finger CCCH type, antiviral 1	0.801702	1.89059	1.73267	0.488953	1.64236	1.42587	0.549765	2.34221	2.15495	0.082191	0.0249184	4.82659e-08	1.53896e-13	5.88462e-13	2.37026e-05	1.33515e-12	1.14312e-11	6.14261e-06	5.56589e-15	2.03234e-14	0.337093	0.767991	9.29878	10.1005	11.1894	11.0314	9.3237	9.87347	11.6659	11.4787	9.38097	9.86993	11.0233	10.8068
A_55_P2180861	666222	Gm7987	predicted gene 7987	0.78695	1.47063	1.73247	0.00349832	0.757533	1.14344	0.119573	1.57809	2.09743	-0.195877	0.213242	0.00858377	4.10164e-05	6.38635e-06	0.989534	0.0108289	0.000499737	0.65493	1.88086e-05	5.98519e-07	0.466486	0.428638	7.25944	8.04639	8.73007	8.99191	7.47268	7.59226	9.05078	9.57012	7.06356	7.06706	7.8211	8.20701
A_55_P2014319	278097	Armcx6	armadillo repeat containing, X-linked 6	0.0799537	1.20081	1.73038	0.177618	1.02612	1.33345	0.0605081	0.774013	1.36925	-0.225879	0.0861736	0.461551	5.15788e-09	2.4363e-11	0.113268	4.63288e-08	1.14576e-09	0.575956	1.86008e-06	7.79637e-10	0.049015	0.42809	11.7345	11.8144	12.9353	13.4649	11.8206	11.8812	12.5947	13.1899	11.5086	11.6862	12.5347	12.842
A_55_P2182483	16423	Cd47	CD47 antigen (Rh-related antigen, integrin-associated signal transducer)	0.266709	1.3733	1.72643	0.168794	1.53513	1.78879	0.215466	1.18457	1.71526	0.154571	0.141659	0.00224792	3.07809e-12	9.20647e-14	0.0352644	5.61303e-13	5.31952e-14	0.0097179	2.87458e-11	1.01765e-13	0.0513333	0.0714799	14.6805	14.9472	16.0538	16.407	14.8222	15.0377	16.0068	16.5375	14.8351	15.0039	16.3702	16.6239
A_55_P2011387	211550	Tifa	TRAF-interacting protein with forkhead-associated domain	0.274171	1.61448	1.72221	0.37892	1.80088	1.64045	0.207549	1.51922	1.00049	-0.385591	0.309046	0.00198252	3.07923e-13	1.13838e-13	0.00010805	5.70886e-14	2.40891e-13	0.0129698	7.83023e-13	4.16751e-10	9.03574e-05	0.000740188	10.6916	10.9658	12.3061	12.4138	11.0007	11.2082	12.5199	12.0012	10.306	10.685	12.1069	11.9465
A_55_P2022629	353371	Oxct2b	3-oxoacid CoA transferase 2B	0.0711986	1.23145	1.72114	-0.0115387	0.669245	0.996114	-0.138125	0.695066	1.15111	0.0357073	0.137545	0.587468	5.39028e-08	4.65997e-10	0.929614	8.91957e-05	8.87919e-07	0.298766	6.00573e-05	1.34194e-07	0.784816	0.300732	6.58936	6.66056	7.8208	8.3105	6.7269	6.58878	7.42197	7.87801	6.62506	6.61353	7.29431	7.62118
A_51_P343215	76980	Ube2ql1	ubiquitin-conjugating enzyme E2Q family-like 1	0.215444	0.694428	1.71548	0.39947	0.382762	0.819387	0.119205	0.726519	1.557	0.24777	-0.230224	0.256798	0.00162246	7.29708e-08	0.0445741	0.0530912	0.000391418	0.524436	0.00112332	2.6664e-07	0.195063	0.226921	6.71919	6.93463	7.41361	8.43466	6.48896	6.60817	7.21548	8.04597	6.96696	7.36643	7.34972	7.78634
A_51_P277795	67246	2810474O19Rik	RIKEN cDNA 2810474O19 gene	0.471928	1.79314	1.71154	0.302628	1.59847	1.41323	0.225831	1.66219	1.42731	0.00656535	0.179179	2.65453e-06	1.12041e-14	2.30906e-14	0.000333852	6.65407e-14	4.43956e-13	0.00372668	3.63413e-14	3.81281e-13	0.922582	0.0160318	12.6035	13.0754	14.3967	14.3151	12.7827	13.0085	14.4449	14.21	12.6101	12.9127	14.2086	14.0233
A_55_P2045163	77683	Ehmt1	euchromatic histone methyltransferase 1	0.464384	2.18143	1.71111	0.256214	1.81897	1.36895	0.245875	2.18686	2.2709	0.146168	0.228564	2.57948e-05	8.49321e-15	3.63228e-13	0.00534728	1.41742e-13	1.0889e-11	0.00701986	8.17138e-15	4.54352e-15	0.0846348	0.011038	11.619	12.0833	13.8004	13.3301	11.8475	12.0934	14.0344	14.1184	11.7651	12.0213	13.5841	13.1341
A_55_P1954693	21333	Tac1	tachykinin 1	0.0504933	0.864372	1.70885	0.164674	0.960154	1.70187	0.242052	1.06393	2.05705	0.323419	-0.123192	0.701249	5.45603e-06	5.58919e-10	0.220998	1.50926e-06	5.93368e-10	0.0796619	4.06992e-07	3.58803e-11	0.0236772	0.354834	7.29175	7.34224	8.15612	9.0006	7.16856	7.41061	8.23249	9.22561	7.61517	7.77984	8.57532	9.31704
A_55_P2038484	232217	4933427D06Rik	RIKEN cDNA 4933427D06 gene	0.368549	1.93979	1.70772	0.252102	1.73419	1.41706	0.135191	1.9383	2.09593	0.012316	0.25136	0.00206949	1.87055e-12	1.29282e-11	0.0230993	1.02496e-11	2.09579e-10	0.19646	1.89263e-12	5.72425e-13	0.903774	0.0234451	12.1436	12.5122	14.0834	13.8513	12.395	12.5302	14.3333	14.4909	12.1559	12.408	13.8901	13.573
A_66_P121787	209086	Samd9l	sterile alpha motif domain containing 9-like	0.724291	1.99903	1.70677	0.800981	2.24713	1.99345	0.695293	1.91878	1.51954	-0.234756	0.0476455	1.38918e-05	1.28536e-11	1.36694e-10	4.25471e-06	2.18015e-12	1.34074e-11	2.20638e-05	2.38176e-11	7.53927e-10	0.0628007	0.690073	13.5171	14.2414	15.5161	15.2239	13.5647	14.26	15.4835	15.0843	13.2823	14.0833	15.5295	15.2758
A_55_P1968723	12457	Ccrn4l	CCR4 carbon catabolite repression 4-like (S. cerevisiae)	0.40362	1.47793	1.70672	0.0613309	1.16898	1.07242	0.269532	1.4671	1.59842	-0.538382	-0.183708	3.28746e-05	5.60455e-13	6.10405e-14	0.397953	1.97985e-11	7.19744e-11	0.00153607	6.27353e-13	1.67954e-13	1.08504e-06	0.0193559	14.1979	14.6015	15.6758	15.9046	14.0142	14.2837	15.4813	15.6126	13.6595	13.7209	14.8285	14.7319
A_55_P2031125	56791	Ube2l6	ubiquitin-conjugating enzyme E2L 6	0.245642	1.49669	1.70532	0.25837	2.06003	2.24214	0.24566	1.69492	1.42712	-0.100295	0.11372	0.0040562	8.03046e-13	1.0796e-13	0.00281386	5.76487e-15	1.53905e-15	0.00405414	1.18652e-13	1.66253e-12	0.189682	0.13998	12.4613	12.7069	13.958	14.1666	12.575	12.8207	14.2699	14.0021	12.361	12.6194	14.421	14.6032
A_55_P2102350	76630	Stambpl1	STAM binding protein like 1	0.233671	1.66033	1.70528	0.312059	1.61431	1.55199	0.303249	1.70111	2.07526	0.0745098	-0.277235	0.11957	3.31148e-09	2.25771e-09	0.0432103	4.94469e-09	8.63609e-09	0.0486924	2.33865e-09	1.28093e-10	0.607087	0.0688128	11.5577	11.7913	13.218	13.2629	11.2804	11.5837	12.9815	13.3557	11.6322	11.9442	13.2465	13.1842
A_51_P304170	67775	Rtp4	receptor transporter protein 4	0.654355	1.65439	1.70397	0.81622	1.70034	1.78768	0.468242	1.41255	1.52358	-0.413005	0.084537	2.17783e-07	2.95177e-13	1.87356e-13	1.06216e-08	1.93618e-13	8.94134e-14	1.37959e-05	3.31087e-12	1.04407e-12	5.52304e-05	0.281331	14.7424	15.3968	16.3968	16.4464	14.8269	15.2952	16.2395	16.3505	14.3294	15.1456	16.0297	16.1171
A_55_P2169069	100038366	Gm10405	predicted gene 10405	0.341023	2.03406	1.70301	0.201829	1.7187	1.31412	0.263881	2.22612	2.32999	0.104032	0.133003	0.0100624	9.18225e-12	1.31341e-10	0.103248	1.14638e-10	5.67873e-09	0.0382249	2.33455e-12	1.16402e-12	0.38618	0.271497	11.231	11.572	13.265	12.934	11.364	11.6279	13.5901	13.694	11.335	11.5368	13.0537	12.6491
A_55_P2246900	330059	A430017K17	uncharacterized protein A430017K17	0.642385	1.38427	1.70145	-0.0967809	0.533035	0.548178	-0.0426967	0.857984	1.45536	0.436624	0.704702	0.00261931	9.92041e-07	6.56754e-08	0.598753	0.00933533	0.00783908	0.815777	0.000217929	5.22357e-07	0.027771	0.0012664	8.2574	8.89978	9.64166	9.95885	8.9621	8.9194	9.82008	10.4175	8.69402	8.59724	9.22705	9.2422
A_55_P2424767	94253	Hecw1	HECT, C2 and WW domain containing E3 ubiquitin protein ligase 1	0.390492	1.98125	1.69482	0.202511	1.80275	1.39348	0.206409	2.01587	2.18526	0.105691	0.253923	0.000152193	3.51509e-14	3.91111e-13	0.0210481	1.5125e-13	7.74912e-12	0.0190506	2.68755e-14	7.67623e-15	0.200265	0.00550204	11.7815	12.1719	13.7627	13.4763	12.0354	12.2418	14.0512	14.2206	11.8871	12.0897	13.6899	13.2806
A_55_P2062911	13839	Epha5	Eph receptor A5	0.361927	1.92993	1.69433	0.197201	1.78823	1.40456	0.173514	1.95868	2.16629	-0.000933657	0.210689	0.00137566	6.9727e-13	5.07765e-12	0.0512196	2.23621e-12	8.51375e-11	0.0822047	5.55816e-13	1.17968e-13	0.992158	0.0387764	11.9075	12.2694	13.8374	13.6018	12.1182	12.2917	14.0769	14.2845	11.9066	12.1038	13.6948	13.3111
A_55_P2140626	75869	Arl5b	ADP-ribosylation factor-like 5B	0.103847	1.38506	1.69275	-0.0452325	1.02777	1.11915	0.0387011	1.87918	1.78975	-0.135251	0.16655	0.111668	1.89229e-13	8.47304e-15	0.473844	1.7877e-11	4.93329e-12	0.539102	1.66357e-15	3.55897e-15	0.0435004	0.0158129	8.87669	8.98054	10.2618	10.5694	9.04324	9.08194	10.9224	10.833	8.74144	8.69621	9.76921	9.86059
A_51_P100327	21354	Tap1	transporter 1, ATP-binding cassette, sub-family B (MDR/TAP)	0.27195	2.31106	1.69216	0.630404	2.73885	2.45135	0.179808	1.81562	2.66844	-0.405806	-0.191814	0.0251796	5.32819e-13	5.98987e-11	3.212e-05	3.88505e-14	2.15376e-13	0.121922	2.08592e-11	5.8137e-14	0.00201778	0.100641	8.41162	8.68357	10.7227	10.1038	8.21981	8.39962	10.0354	10.8882	8.00582	8.63622	10.7447	10.4572
A_55_P2056280	72338	Wdr89	WD repeat domain 89	0.318186	1.93953	1.69194	0.143352	1.67235	1.35888	0.140573	1.84445	2.05644	0.100185	0.290028	0.00981373	6.20924e-12	4.8508e-11	0.205078	5.77229e-11	1.22487e-09	0.213553	1.3275e-11	2.552e-12	0.369546	0.0167371	12.3694	12.6876	14.309	14.0614	12.6595	12.8	14.5039	14.7159	12.4696	12.613	14.142	13.8285
A_51_P191463	14990	H2-M2	histocompatibility 2, M region locus 2	-0.0232523	1.30185	1.69058	0.110119	1.77973	2.34124	0.208662	1.87294	2.31914	-0.685302	-0.142601	0.802276	1.84515e-10	3.65984e-12	0.245533	1.67324e-12	2.45555e-14	0.0364245	7.6669e-13	2.84464e-14	1.32784e-06	0.138105	11.6996	11.6764	13.0015	13.3902	11.557	11.7657	13.43	13.8762	11.0143	11.1245	12.7941	13.3556
A_55_P2007249	30051	Spdef	SAM pointed domain containing ets transcription factor	0.241465	0.253371	1.68824	0.0786787	0.191221	0.679564	0.0716392	0.282802	1.14907	0.105995	0.250266	0.00412091	0.00291222	1.00199e-13	0.291533	0.0174998	6.71987e-08	0.335398	0.00123488	3.52139e-11	0.161144	0.00318831	6.99987	7.24133	7.25324	8.68811	7.25013	7.32177	7.53294	8.39921	7.10586	7.18454	7.29709	7.78543
A_55_P2037121	217203	Tmem106a	transmembrane protein 106A	-0.0900779	1.62607	1.68583	0.0831388	2.13015	2.36517	0.0146131	1.64846	2.36662	-0.138987	-0.396707	0.380222	2.52026e-11	1.46432e-11	0.417155	4.1577e-13	8.29211e-14	0.885425	2.05217e-11	8.21395e-14	0.182915	0.00110398	8.25275	8.16268	9.87883	9.93858	7.85605	7.87066	9.5045	10.2227	8.11377	8.19691	10.2439	10.4789
A_55_P2174198	319158	Hist1h4i	histone cluster 1, H4i	0.237956	1.91299	1.68502	0.129148	1.17804	1.1541	0.323911	2.06116	2.38114	-0.0919306	-0.111771	0.047839	1.07762e-11	7.23179e-11	0.261681	1.29674e-08	1.72775e-08	0.0101054	3.47946e-12	3.83251e-13	0.419689	0.328919	9.12624	9.3642	11.0392	10.8113	9.01447	9.33838	11.0756	11.3956	9.03431	9.16346	10.2123	10.1884
A_55_P2149763	21356	Tapbp	TAP binding protein	0.243746	1.55796	1.68472	0.205324	1.61042	1.79687	0.220461	1.59375	1.51882	0.0167962	-0.0225317	0.00134835	4.11409e-14	1.22273e-14	0.00487731	2.46271e-14	4.48657e-15	0.00293936	2.89399e-14	6.09957e-14	0.792639	0.724584	13.6665	13.9103	15.2245	15.3513	13.644	13.8645	15.2377	15.1628	13.6833	13.8886	15.2937	15.4802
A_52_P69558	666661	Gm8221	apolipoprotein L 7c pseudogene	0.287856	2.01898	1.68377	0.471126	2.15751	1.74154	0.408964	2.19512	1.45979	-0.344521	-0.240102	0.00155038	1.27378e-14	2.11323e-13	1.22636e-05	4.53675e-15	1.25642e-13	5.86883e-05	3.46582e-15	1.88446e-12	0.000325304	0.00585916	7.32732	7.61518	9.3463	9.0111	7.08722	7.49618	9.28234	8.54701	6.9828	7.45393	9.14031	8.72434
A_51_P112182	208171	Tmprss7	transmembrane serine protease 7	0.164047	0.819128	1.68299	-0.0130246	0.454628	0.875021	0.0158445	0.249242	1.0018	0.0187481	0.15098	0.406449	0.000611526	1.82368e-07	0.946862	0.0312177	0.000335536	0.935382	0.213608	8.86797e-05	0.923578	0.444081	6.28911	6.45316	7.10824	7.9721	6.44009	6.45593	6.68933	7.44189	6.30786	6.29483	6.76249	7.18288
A_51_P254646	81703	Jdp2	Jun dimerization protein 2	0.235562	1.38155	1.68108	-0.0291704	0.819639	0.829707	0.0482807	1.17371	1.77305	0.437785	0.0733134	0.00344517	1.01448e-12	4.94939e-14	0.676394	2.4249e-09	2.03449e-09	0.491773	1.20906e-11	2.16817e-14	9.47877e-06	0.301209	12.0169	12.2525	13.3985	13.698	12.0902	12.1385	13.2639	13.8633	12.4547	12.4255	13.2743	13.2844
A_55_P1968863	68760	Synpo2l	synaptopodin 2-like	0.403942	2.00022	1.68077	0.204143	1.68521	1.36253	0.175864	1.80512	1.98547	0.124721	0.297151	0.000131176	4.07011e-14	5.94809e-13	0.0222671	5.71255e-13	1.44927e-11	0.0445123	1.98606e-13	4.56443e-14	0.141486	0.00202342	11.9931	12.3971	13.9934	13.6739	12.2903	12.4661	14.0954	14.2757	12.1179	12.322	13.8031	13.4804
A_55_P2076631	71683	Gypc	glycophorin C	0.270442	1.6816	1.68031	0.322565	1.70624	1.56598	0.168914	1.53248	1.53209	-0.242711	0.0178983	0.000593486	1.4131e-14	1.43012e-14	0.000110742	1.12733e-14	4.26509e-14	0.0169063	5.96045e-14	5.98406e-14	0.00148253	0.781001	14.8779	15.1484	16.5595	16.5582	14.8958	15.0647	16.4283	16.4279	14.6352	14.9578	16.3415	16.2012
A_52_P194851	73692	2410089E03Rik	RIKEN cDNA 2410089E03 gene	0.0439124	0.821907	1.67924	-0.02651	0.324892	0.900093	-0.000381365	0.24955	1.3379	0.0201461	0.0693339	0.857308	0.00354214	3.20799e-06	0.913534	0.195304	0.00178641	0.998753	0.314583	4.38112e-05	0.934231	0.776663	7.3215	7.36541	8.1434	9.00073	7.39083	7.39045	7.64038	8.72874	7.34164	7.31513	7.66654	8.24174
A_55_P2083894	100042151	Gm3697	predicted gene 3697	0.316637	1.55201	1.67796	0.208457	1.4035	1.5294	0.239377	1.7813	1.36655	-0.258202	-0.142958	0.0577555	2.87398e-08	9.67661e-09	0.197009	1.13234e-07	3.51873e-08	0.141715	4.14901e-09	1.61819e-07	0.114922	0.369557	7.16804	7.48467	8.72005	8.84599	7.02508	7.26446	8.80637	8.39163	6.90983	7.11829	8.31333	8.43924
A_55_P2069350	100678	Psph	phosphoserine phosphatase	0.453709	1.11827	1.67547	0.098556	0.16089	0.442016	0.344204	0.743817	1.78694	1.11682	0.145223	0.000276791	4.49345e-09	1.17087e-11	0.328333	0.119343	0.000353739	0.00285965	1.11111e-06	4.41604e-12	4.57686e-09	0.156861	12.0723	12.526	13.1906	13.7478	12.2175	12.5617	12.9614	14.0045	13.1891	13.2877	13.35	13.6312
A_55_P2027259	227449	Zcchc2	zinc finger, CCHC domain containing 2	0.239675	1.52096	1.67243	0.273671	1.55773	1.62232	0.153621	1.70997	1.5585	-0.366625	-0.0356236	0.0064624	1.22907e-12	2.86674e-13	0.0025411	8.52904e-13	4.57511e-13	0.0619071	2.03708e-13	8.46475e-13	0.000203528	0.647689	11.6906	11.9303	13.2115	13.363	11.655	11.8086	13.3649	13.2135	11.324	11.5976	12.8817	12.9463
A_51_P306017	13388	Dll1	delta-like 1 (Drosophila)	0.738594	2.93445	1.67079	0.574473	3.1609	2.11916	0.607986	3.53688	1.93187	0.0458818	0.0782404	1.05812e-06	1.77171e-15	1.03591e-11	2.13875e-05	5.54563e-16	2.75709e-13	1.12123e-05	9.53598e-17	1.1397e-12	0.641493	0.430242	6.45063	7.18922	9.38508	8.12141	6.52887	7.13685	10.0658	8.46073	6.49651	7.07098	9.65741	8.61567
A_66_P122086	105892	9030619P08Rik	lymphocyte antigen 6 complex pseudogene	-0.0247587	1.13903	1.6706	0.119738	1.8011	2.73791	-0.109744	1.06409	1.84075	-1.09053	-0.0816918	0.797815	2.31819e-09	8.03093e-12	0.225922	2.56406e-12	4.00968e-15	0.265291	6.12544e-09	1.83983e-12	4.32097e-09	0.402822	10.2626	10.2378	11.4016	11.9332	10.1809	10.0711	11.245	12.0216	9.17204	9.29177	10.9731	11.9099
A_55_P2166049	81013	Vmn1r65	vomeronasal 1 receptor 65	0.481029	2.26054	1.6703	0.623494	2.83963	2.4622	0.349659	2.90711	2.03015	-0.361529	0.0402374	0.00088623	2.1452e-12	2.02256e-10	7.56091e-05	6.45825e-14	5.80861e-13	0.0091699	4.49061e-14	1.09609e-11	0.0074367	0.737349	7.29773	7.77876	9.55827	8.96803	7.33796	7.68762	10.2451	9.36811	6.9362	7.55969	9.77582	9.3984
A_55_P1982533	83603	Elovl4	elongation of very long chain fatty acids (FEN1/Elo2, SUR4/Elo3, yeast)-like 4	0.132562	0.567793	1.66757	-0.0703183	0.172065	1.24148	0.267481	0.742139	1.70167	0.107668	0.176763	0.269934	0.00016539	1.6236e-10	0.552832	0.157457	1.1527e-08	0.0349154	9.16609e-06	1.20295e-10	0.367071	0.147115	8.49552	8.62808	9.06331	10.1631	8.67228	8.93976	9.41442	10.3739	8.60318	8.53287	8.77525	9.84466
A_55_P2078123	19883	Rora	RAR-related orphan receptor alpha	-0.141624	0.992289	1.66734	-0.0752941	1.29137	1.48558	-0.0678732	1.52265	1.81271	-0.5764	0.152465	0.308203	1.64762e-06	1.42819e-09	0.583485	5.223e-08	7.44346e-09	0.620805	5.24896e-09	4.22872e-10	0.0005788	0.273887	9.46988	9.32825	10.4622	11.1372	9.62234	9.55447	11.145	11.435	8.89348	8.81818	10.1848	10.3791
A_55_P2044364	212377	Mms22l	MMS22-like, DNA repair protein	0.369693	1.8029	1.66662	0.148645	1.43129	1.07675	0.27077	1.82822	2.06853	0.242264	0.16764	0.00116671	2.00884e-12	6.6333e-12	0.132075	6.53963e-11	4.18193e-09	0.0106835	1.62381e-12	2.44572e-13	0.0199284	0.0924533	13.1231	13.4927	14.926	14.7897	13.2907	13.5615	15.1189	15.3592	13.3653	13.514	14.7966	14.4421
A_52_P359257	100042390	Gm3819	predicted gene 3819	0.583086	1.40032	1.66488	0.365124	1.3852	1.41226	0.398735	1.28052	1.2444	-0.279466	0.24121	5.49912e-07	1.92069e-12	1.35037e-13	0.000124897	2.26625e-12	1.68734e-12	5.00189e-05	7.47491e-12	1.152e-11	0.00142165	0.00431181	9.55727	10.1404	10.9576	11.2221	9.79848	10.1972	11.079	11.0429	9.2778	9.64293	10.663	10.6901
A_55_P2088018	225288	Fhod3	formin homology 2 domain containing 3	-0.10611	0.210428	1.66435	-0.0668788	-0.371457	0.676538	-0.224996	-0.0820122	1.52216	0.106393	-0.136517	0.355197	0.0773654	9.23486e-11	0.556813	0.00424927	1.6788e-05	0.0606736	0.472424	3.45635e-10	0.353949	0.238352	8.16924	8.06313	8.37967	9.83359	8.03272	7.80773	7.95071	9.55488	8.27563	8.20875	7.90418	8.95217
A_51_P285736	18566	Pdcd1	programmed cell death 1	0.166281	2.24167	1.66176	0.154242	2.1662	1.47835	-0.0460439	1.96203	0.959253	-0.183775	-0.0152166	0.136922	4.89139e-13	4.58297e-11	0.165656	8.26837e-13	2.60049e-10	0.670263	3.74398e-12	1.18224e-07	0.102763	0.887804	6.50437	6.67066	8.74605	8.16613	6.48916	6.44311	8.45118	7.44841	6.3206	6.47484	8.4868	7.79895
A_55_P2017729	100039286	Gm2138	predicted gene 2138	0.372267	1.05538	1.66168	-0.0227382	1.01956	0.844018	0.0278139	0.70067	1.27922	0.110959	0.266317	0.14791	0.000546639	4.54822e-06	0.927137	0.000741033	0.00333806	0.91094	0.0113479	8.54059e-05	0.656406	0.292763	7.43367	7.80594	8.48906	9.09535	7.69999	7.7278	8.40066	8.97921	7.54463	7.52189	8.56419	8.38865
A_52_P364130	53859	Map3k14	mitogen-activated protein kinase kinase kinase 14	0.0545582	0.962009	1.66136	-0.0509332	0.916114	1.45724	0.206576	1.09349	1.53845	-0.147233	-0.128308	0.40834	8.89477e-11	2.14594e-14	0.439542	1.83596e-10	1.62974e-13	0.00544446	1.30497e-11	7.05588e-14	0.0359322	0.0632336	11.1662	11.2208	12.1282	12.8276	11.0379	11.2445	12.1314	12.5764	11.019	10.9681	11.9351	12.4762
A_55_P2000943	78593	Nrip3	nuclear receptor interacting protein 3	-0.12253	0.49522	1.66065	-0.0725211	0.142346	0.889787	-0.0599279	0.71241	1.68532	-0.12064	-0.309023	0.150281	1.56526e-05	7.79727e-13	0.384316	0.0983467	8.10134e-09	0.470497	1.7167e-07	6.22074e-13	0.156266	0.00155322	7.60785	7.48532	8.10307	9.2685	7.29883	7.2389	8.01124	8.98414	7.48721	7.41469	7.62956	8.377
A_55_P2122020	16600	Klf4	Kruppel-like factor 4 (gut)	0.183803	1.67876	1.66021	0.245052	1.61725	1.24496	0.0614011	1.56654	1.2901	-0.215187	-0.266253	0.0733821	8.50327e-12	1.00582e-11	0.0212354	1.49389e-11	7.25285e-10	0.530982	2.41276e-11	4.31006e-10	0.0394068	0.0135346	13.1612	13.345	14.8399	14.8214	12.8949	12.9563	14.4615	14.185	12.946	13.191	14.5632	14.191
A_52_P400509	11920	Atm	ataxia telangiectasia mutated homolog (human)	0.150888	1.70752	1.65927	0.198513	1.80979	1.33439	0.0804464	1.98897	1.47281	0.278788	0.162718	0.0725098	3.06933e-13	4.76744e-13	0.0223427	1.25303e-13	1.31532e-11	0.320419	2.90985e-14	2.94847e-12	0.00267175	0.0546558	9.14855	9.29944	10.8561	10.8078	9.31127	9.39172	11.3002	10.7841	9.42734	9.62586	11.2371	10.7617
A_55_P2150058	68040	Zfp593	zinc finger protein 593	0.353587	1.34114	1.65786	0.185716	1.12202	1.18091	0.243218	1.03252	1.74358	0.0116241	-0.166004	0.00278751	4.56096e-10	1.95498e-11	0.0820674	5.97945e-09	2.88354e-09	0.0272904	1.92326e-08	9.14057e-12	0.908957	0.116679	11.4654	11.8189	12.8065	13.1232	11.2993	11.5426	12.3319	13.0429	11.477	11.6627	12.599	12.6579
A_51_P249215	19217	Ptger2	prostaglandin E receptor 2 (subtype EP2)	-0.0760613	0.203554	1.65766	-0.0038999	0.241828	2.10212	0.0966007	0.564751	1.76185	0.0547791	-0.263489	0.278672	0.00850889	5.1347e-14	0.954853	0.00260618	1.27707e-15	0.17364	3.49084e-07	1.99652e-14	0.431116	0.00133151	6.51138	6.43532	6.71494	8.16904	6.24789	6.3445	6.81265	8.00975	6.56616	6.56226	6.80799	8.66828
A_51_P519251	56312	Nupr1	nuclear protein transcription regulator 1	0.263874	0.892364	1.65299	0.0987881	0.451222	0.973908	0.213923	0.904186	1.63153	0.727007	0.0718395	0.00222778	1.57166e-09	1.49942e-13	0.191892	1.2613e-05	4.40398e-10	0.00944443	1.29934e-09	1.83384e-13	2.8546e-08	0.336444	15.4062	15.6701	16.2985	17.0592	15.478	15.6919	16.3822	17.1096	16.1332	16.232	16.5844	17.1071
A_55_P2108784	239027	Arhgap22	Rho GTPase activating protein 22	0.342027	0.463507	1.64919	0.316586	0.0522796	1.14556	0.324392	0.267192	2.23182	-0.192443	-0.299774	0.0148667	0.00195974	5.90317e-10	0.0224597	0.681878	1.00269e-07	0.0198041	0.0488105	6.50504e-12	0.144003	0.029373	11.5753	11.9173	12.0388	13.2245	11.2755	11.5999	11.5427	13.5073	11.3828	11.6994	11.4351	12.5284
A_51_P433870	22341	Vegfc	vascular endothelial growth factor C	0.0862304	1.18853	1.64277	0.252596	0.677779	1.01941	0.0320952	1.19213	1.26617	0.284526	-0.157529	0.379101	1.30662e-09	1.07986e-11	0.0175458	2.58964e-06	1.16696e-08	0.740701	1.25061e-09	5.20302e-10	0.00880439	0.117993	11.9594	12.0456	13.1479	13.6021	11.8018	11.8339	12.994	13.068	12.2439	12.4965	12.9217	13.2633
A_55_P2104975	238393	Serpina3f	serine (or cysteine) peptidase inhibitor, clade A, member 3F	0.22376	2.36027	1.63898	0.356821	3.08135	2.11527	0.4408	2.54601	1.63371	-0.370185	0.30728	0.0213655	1.14366e-14	3.13741e-12	0.000902467	1.7816e-16	6.25468e-14	0.00012647	3.51805e-15	3.29508e-12	0.000656701	0.00295757	9.69128	9.91504	12.0515	11.3303	9.99856	10.4394	12.5446	11.6323	9.32109	9.67792	12.4024	11.4364
A_51_P265495	110454	Ly6a	lymphocyte antigen 6 complex, locus A	-0.124921	0.939851	1.63849	-0.0130239	1.78184	2.81614	0.0346702	0.922051	1.35154	-0.901616	0.00638771	0.288048	3.82586e-07	1.56138e-10	0.910194	4.48307e-11	4.15974e-14	0.764263	4.90501e-07	2.58924e-09	6.5489e-07	0.955876	14.5011	14.3762	15.4409	16.1396	14.5075	14.5421	15.4295	15.859	13.5995	13.5864	15.3813	16.4156
A_55_P2156556	100039404	Gm2212	predicted gene 2212	0.362965	2.00803	1.63827	0.377388	1.8466	1.47197	0.139158	1.93893	2.16494	0.125026	0.371309	0.00408493	3.55726e-12	7.61604e-11	0.00308699	1.26576e-11	3.70821e-10	0.217101	6.0524e-12	1.12961e-12	0.265247	0.00347398	10.0051	10.3681	12.0131	11.6434	10.3764	10.5156	12.3154	12.5414	10.1301	10.5075	11.9767	11.6021
A_55_P1995092	15007	H2-Q10	histocompatibility 2, Q region locus 10	0.0715617	1.2951	1.63456	0.254435	1.91279	2.44232	0.222356	1.69893	2.24025	-0.74447	-0.131765	0.335979	5.81597e-12	1.65341e-13	0.00282643	1.45217e-14	3.2097e-16	0.00718614	9.11105e-14	1.23876e-15	1.91977e-08	0.0865804	10.6933	10.7649	11.9884	12.3279	10.5615	10.7839	12.2605	12.8018	9.94884	10.2033	11.8616	12.3912
A_55_P1969742	676575	Gm9684	predicted gene 9684	0.102275	0.983614	1.63111	0.155844	0.708659	0.966481	0.0454894	1.05128	1.46962	-0.0238341	0.0369328	0.335206	5.54074e-08	3.81264e-11	0.149587	3.83519e-06	7.03766e-08	0.66442	2.21736e-08	1.7985e-10	0.819801	0.724402	6.27187	6.37415	7.25548	7.90298	6.3088	6.35429	7.36008	7.77842	6.24804	6.40388	6.9567	7.21452
A_51_P305547	20583	Snai2	snail homolog 2 (Drosophila)	0.140528	1.26385	1.62765	-0.187326	0.784431	0.879474	0.10794	1.20909	0.985505	0.151721	0.048505	0.0837426	1.91276e-11	4.07521e-13	0.0257742	1.97696e-08	3.94368e-09	0.175712	3.71853e-11	7.63802e-10	0.0638394	0.533251	13.372	13.5125	14.6358	14.9996	13.4205	13.5284	14.6296	14.406	13.5237	13.3364	14.3081	14.4032
A_51_P193173	227731	Slc25a25	solute carrier family 25 (mitochondrial carrier, phosphate carrier), member 25	0.0685101	0.811764	1.62673	0.0556155	0.540209	1.32486	0.196741	0.976038	1.62278	0.111028	-0.267463	0.295239	8.70139e-10	2.36391e-14	0.392676	2.53165e-07	5.61139e-13	0.00681538	5.74826e-11	2.45484e-14	0.0986898	0.000654319	11.6078	11.6763	12.4195	13.2345	11.3403	11.537	12.3163	12.9631	11.7188	11.7744	12.259	13.0437
A_55_P2094626	241308	Ralgps1	Ral GEF with PH domain and SH3 binding motif 1	0.357977	1.91763	1.62626	0.227963	1.82601	1.54769	0.189892	2.0949	2.25699	-0.022903	0.0452378	0.00668246	1.73806e-11	2.03087e-10	0.0646583	3.62535e-11	4.20779e-10	0.117797	4.5657e-12	1.46787e-12	0.844423	0.698821	10.5316	10.8896	12.4493	12.1579	10.5769	10.7668	12.6718	12.8339	10.5087	10.7367	12.3347	12.0564
A_51_P425048	15013	H2-Q2	histocompatibility 2, Q region locus 2	0.0390506	1.27866	1.62466	0.26737	1.76549	2.32355	0.10714	1.54716	2.27957	-0.876434	-0.22273	0.640217	4.82788e-11	1.29049e-12	0.00493705	3.60995e-13	5.14343e-15	0.209736	2.71962e-12	6.92512e-15	1.17052e-08	0.0152961	12.2607	12.2997	13.5393	13.8853	12.0379	12.1451	13.5851	14.3175	11.3842	11.6516	13.1497	13.7078
A_52_P468639	258437	Olfr450	olfactory receptor 450	0.0673017	1.06254	1.62409	0.0551055	0.405546	0.76654	0.193645	1.14709	2.00842	-0.0287698	0.00633115	0.746855	9.26891e-05	6.63089e-07	0.79144	0.0654142	0.00180467	0.358789	4.13109e-05	3.92535e-08	0.890103	0.975735	6.28065	6.34795	7.34319	7.90473	6.28698	6.48062	7.43407	8.2954	6.25188	6.30698	6.65742	7.01842
A_55_P1962149	56087	Dnah10	dynein, axonemal, heavy chain 10	0.169265	0.707661	1.62402	0.0865883	0.653567	0.769801	0.0827311	0.624538	1.09295	-0.0320813	-0.0319947	0.185855	2.90574e-05	5.3049e-10	0.489563	6.83948e-05	1.1224e-05	0.508829	0.000109382	1.3898e-07	0.796613	0.797149	6.80965	6.97892	7.51731	8.43367	6.77766	6.86039	7.4022	7.87061	6.77757	6.86416	7.43114	7.54737
A_52_P431615	434223	Gm1966	predicted gene 1966	0.621818	1.67502	1.61666	0.515124	2.50708	2.53669	0.555763	2.3577	2.96669	-0.890514	0.0377588	0.00282293	5.98275e-08	9.67495e-08	0.0100237	1.9042e-10	1.60071e-10	0.00620137	4.70009e-10	1.54342e-11	0.000120718	0.833075	10.4818	11.1036	12.1568	12.0985	10.5196	11.0753	12.8773	13.4863	9.5913	10.1064	12.0984	12.128
A_55_P1970270	53625	B3gnt2	UDP-GlcNAc:betaGal beta-1,3-N-acetylglucosaminyltransferase 2	0.254507	1.07672	1.61378	0.0775913	1.48356	1.29927	0.160867	1.34679	1.66435	0.141868	0.0534257	0.0104756	1.64126e-09	4.02068e-12	0.38956	1.43646e-11	1.04592e-10	0.0854683	6.12715e-11	2.51485e-12	0.125483	0.551065	10.6373	10.8918	11.714	12.2511	10.6908	10.8516	12.0375	12.3551	10.7792	10.8568	12.2628	12.0785
A_55_P2179309	213438	A630033H20Rik	RIKEN cDNA A630033H20 gene	0.160245	1.29023	1.61221	0.0605162	1.30867	1.3608	-0.0776061	0.83076	1.24902	0.126418	0.00886679	0.318727	3.71925e-07	1.83274e-08	0.702625	3.08929e-07	1.84471e-07	0.624944	6.87826e-05	5.66752e-07	0.428748	0.955288	9.84689	10.0071	11.1371	11.4591	9.85575	9.77815	10.6865	11.1048	9.9733	10.0338	11.282	11.3341
A_51_P379976	11861	Arl4a	ADP-ribosylation factor-like 4A	0.249474	1.80348	1.61023	0.235136	1.66616	1.19622	0.247359	1.75036	1.6209	0.152321	-0.173664	0.0256454	6.64029e-12	3.66212e-11	0.0339548	2.19401e-11	2.87443e-09	0.0267371	1.04375e-11	3.31703e-11	0.152375	0.10598	11.1724	11.4219	12.9759	12.7826	10.9987	11.2461	12.7491	12.6196	11.3247	11.5599	12.9909	12.5209
A_51_P248122	170770	Bbc3	BCL2 binding component 3	0.271998	1.04483	1.60909	-0.060599	0.579128	0.854706	0.193699	1.05131	1.64814	0.134924	0.155882	0.0783628	2.12083e-06	6.65201e-09	0.680676	0.00103432	2.26489e-05	0.199126	1.96452e-06	4.73285e-09	0.364605	0.296987	12.8878	13.1598	13.9326	14.4969	13.0437	13.2374	14.095	14.6918	13.0227	12.9621	13.6018	13.8774
A_66_P105422	74365	Lonrf3	LON peptidase N-terminal domain and ring finger 3	0.0347687	0.415886	1.60745	0.00799287	0.200376	0.917927	0.0340619	0.651889	1.36619	0.682825	0.0849661	0.803577	0.00810515	3.3018e-09	0.954361	0.164461	5.55511e-06	0.807484	0.000226094	3.24686e-08	0.000143434	0.545297	7.63057	7.66533	8.04645	9.23801	7.71553	7.74959	8.36742	9.08172	8.31339	8.32138	8.51377	9.23132
A_55_P2120919	100043874	Gm4703	predicted gene 4703	0.218885	1.55543	1.60729	0.0534189	1.35429	1.38742	0.373821	1.45207	1.37834	-0.118754	-0.0364473	0.0962001	1.1692e-09	7.25915e-10	0.671837	8.47949e-09	6.02388e-09	0.00818974	3.14807e-09	6.61169e-09	0.351709	0.772209	7.04279	7.26168	8.59822	8.65008	7.00635	7.38017	8.45842	8.38468	6.92404	6.97746	8.27833	8.31146
A_55_P2213828	71086	4933412E12Rik	RIKEN cDNA 4933412E12 gene	0.196918	1.47943	1.60704	0.258562	1.80395	1.81254	0.20077	1.43884	1.63625	-0.402236	-0.157994	0.111634	1.05535e-09	3.15136e-10	0.0419982	5.68473e-11	5.29562e-11	0.105333	1.57877e-09	2.41726e-10	0.00339238	0.195459	11.7267	11.9236	13.2061	13.3337	11.5687	11.7695	13.0075	13.2049	11.3244	11.583	13.1284	13.137
A_51_P134452	65086	Lpar3	lysophosphatidic acid receptor 3	0.159656	0.784689	1.60678	-0.522831	-0.48186	0.630711	0.216954	0.615563	1.40778	0.89952	0.137872	0.6167	0.0233446	0.000101888	0.114151	0.143057	0.0609636	0.497861	0.06675	0.000369713	0.0110372	0.665246	6.22954	6.3892	7.01423	7.83632	6.36741	6.58437	6.98297	7.77519	7.12906	6.60623	6.6472	7.75977
A_55_P2008061	16439	Itpr2	inositol 1,4,5-triphosphate receptor 2	0.041103	1.50624	1.60179	0.0588776	1.25623	1.3264	0.0906368	1.70305	1.3232	-0.0827764	0.0618877	0.636364	7.46006e-12	2.93323e-12	0.499867	1.13461e-10	5.05021e-11	0.303723	1.15149e-12	5.23574e-11	0.346238	0.478541	11.6491	11.6902	13.1554	13.2509	11.711	11.8017	13.4141	13.0342	11.5664	11.6252	12.8226	12.8928
A_55_P1966660	547349	LOC547349	MHC class I family member	0.0580123	1.18406	1.59988	0.266521	1.93533	2.46242	0.27965	1.40616	1.60687	-0.762201	-0.0308714	0.592053	6.39525e-09	8.00067e-11	0.0231882	4.56833e-12	1.14196e-13	0.0180563	5.37455e-10	7.49821e-11	2.28111e-06	0.774793	12.5718	12.6298	13.7558	14.1716	12.5409	12.8205	13.9471	14.1478	11.8096	12.0761	13.7449	14.272
A_55_P2181386	223780	Adm2	adrenomedullin 2	0.113856	0.854327	1.5981	0.0574496	0.445134	1.24133	0.376043	0.916968	1.94026	0.424486	-0.234386	0.194144	2.34913e-08	2.40689e-12	0.50377	7.38363e-05	1.07931e-10	0.000388234	8.73095e-09	1.22818e-13	0.000120295	0.01316	8.56418	8.67804	9.41851	10.1623	8.3298	8.70584	9.24677	10.2701	8.98867	9.04612	9.4338	10.23
A_51_P105017	19365	Rad52	RAD52 homolog (S. cerevisiae)	0.00504749	0.891154	1.597	-0.00813047	0.335367	1.06653	0.167144	1.1584	1.83698	0.202596	-0.0626146	0.936818	1.91828e-10	2.70185e-14	0.898412	6.68841e-05	1.31113e-11	0.0169693	3.75263e-12	3.06435e-15	0.00525639	0.332762	9.98147	9.98652	10.8726	11.5785	9.91885	10.086	11.0772	11.7558	10.1841	10.1759	10.5194	11.2506
A_55_P2142863	80285	Parp9	poly (ADP-ribose) polymerase family, member 9	0.684275	2.01875	1.59384	0.816324	2.26417	1.78557	0.532944	2.04651	1.42441	-0.218577	0.0876847	5.99048e-08	6.11657e-15	2.37574e-13	5.1269e-09	1.02196e-15	4.11269e-14	1.57812e-06	4.94514e-15	1.3316e-12	0.00793029	0.241089	12.7092	13.3935	14.7279	14.303	12.7969	13.3298	14.8434	14.2213	12.4906	13.3069	14.7548	14.2762
A_55_P2470474	638247	9530082P21Rik	RIKEN cDNA 9530082P21 gene	0.410262	2.47295	1.59176	0.631616	2.98975	2.66289	0.357243	2.779	1.73123	-0.428718	0.176737	0.00351206	6.9489e-13	5.19686e-10	7.8095e-05	3.73011e-14	2.22975e-13	0.00886862	1.15498e-13	1.50969e-10	0.0025398	0.159709	7.48002	7.89028	9.95297	9.07178	7.65676	8.014	10.4358	9.38799	7.0513	7.68292	10.0411	9.7142
A_51_P184806	244548	Elmod2	ELMO/CED-12 domain containing 2	0.228167	2.08839	1.58686	0.188558	1.89056	1.27637	0.194847	1.82764	1.12052	0.219961	0.173744	0.158635	3.9412e-10	2.00951e-08	0.239362	1.67723e-09	3.79618e-07	0.224732	2.72941e-09	1.99141e-06	0.173214	0.276716	10.3676	10.5957	12.456	11.9544	10.5413	10.7362	12.3689	11.6618	10.5875	10.7761	12.4781	11.8639
A_55_P1959953	229003	Helz2	helicase with zinc finger 2, transcriptional coactivator	0.803749	2.03393	1.58596	0.993783	2.31058	1.89293	0.892795	2.30414	1.82378	-0.245376	-0.0842661	1.57775e-07	2.00382e-13	8.94995e-12	8.54288e-09	2.79225e-14	6.04437e-13	3.8015e-08	2.91567e-14	1.06865e-12	0.0158516	0.367652	13.9356	14.7393	15.9695	15.5216	13.8513	14.7441	16.1555	15.6751	13.6902	14.684	16.0008	15.5832
A_51_P133582	12418	Cbx4	chromobox 4	0.368065	1.28194	1.58549	0.198	1.31441	1.31007	0.310393	1.46575	1.71429	-0.207136	0.0635345	0.000470199	6.63641e-11	2.69508e-12	0.0314939	4.56817e-11	4.79999e-11	0.00197554	8.87142e-12	8.17711e-13	0.0253651	0.46017	11.9298	12.2978	13.2117	13.5153	11.9933	12.3037	13.4591	13.7076	11.7226	11.9206	13.037	13.0327
A_55_P2057132	20273	Scn8a	sodium channel, voltage-gated, type VIII, alpha	0.329939	1.88068	1.58495	0.272384	1.70891	1.29721	0.110116	2.05103	2.19688	0.213035	0.302974	0.0133867	3.77093e-11	4.75473e-10	0.0355562	1.56924e-10	8.49089e-09	0.366934	1.02335e-11	3.61319e-12	0.0914333	0.0212751	9.69431	10.0243	11.575	11.2793	9.99729	10.1074	12.0483	12.1942	9.90735	10.1797	11.6163	11.2046
A_55_P2118675	57783	Tnip1	TNFAIP3 interacting protein 1	0.0361731	0.780007	1.58291	0.140543	0.568128	1.32128	0.00753804	0.885504	1.93105	0.139674	0.0658777	0.54702	5.29529e-10	1.14565e-14	0.0295609	4.75941e-08	1.87658e-13	0.899569	8.1447e-11	5.15919e-16	0.0304392	0.279076	13.2733	13.3095	14.0533	14.8562	13.3392	13.3467	14.2247	15.2703	13.413	13.5535	13.9811	14.7343
A_52_P220783	268567	Tmem229b	transmembrane protein 229B	0.340409	2.54953	1.5826	0.654754	3.42741	2.43679	0.251092	2.246	1.52532	-0.308185	0.0918866	0.000346234	3.07674e-16	5.0474e-13	1.90625e-07	2.94877e-18	6.24374e-16	0.00415949	2.23109e-15	8.88024e-13	0.000842536	0.238906	9.49264	9.83305	12.0422	11.0752	9.58452	9.83561	11.8305	11.1098	9.18445	9.83921	12.6119	11.6212
A_55_P2045642	56471	Stmn4	stathmin-like 4	-0.0585207	0.548581	1.5822	0.12913	0.290067	1.38329	0.0283418	0.855838	2.04345	0.855707	-0.276408	0.604781	0.000148488	1.80765e-10	0.26118	0.0187694	1.29102e-09	0.801445	9.25281e-07	3.89358e-12	9.27086e-07	0.0240681	8.32786	8.26934	8.87644	9.91005	8.05145	8.07979	8.90729	10.0949	9.18356	9.31269	9.47363	10.5669
A_51_P145220	18040	Nefm	neurofilament, medium polypeptide	-0.0870012	0.821507	1.58076	-0.0102836	0.834506	1.48713	-0.0105664	1.00425	1.64236	-0.0367395	-0.129557	0.341763	8.59572e-08	6.60308e-12	0.909229	6.94863e-08	1.66066e-11	0.906745	5.29026e-09	3.69714e-12	0.684509	0.163957	6.5606	6.4736	7.38211	8.14137	6.43105	6.42048	7.43529	8.0734	6.52386	6.51358	7.35837	8.01099
A_55_P2112142	75010	Tmbim7	transmembrane BAX inhibitor motif containing 7	0.116035	1.11582	1.57999	0.276961	0.665688	0.96251	0.27833	0.204244	0.838307	-0.241276	-0.063592	0.569523	4.23712e-05	6.82381e-07	0.184824	0.00426558	0.000193853	0.182781	0.321954	0.000695981	0.244857	0.754401	6.90701	7.02305	8.02283	8.487	6.84342	7.12175	7.04766	7.68173	6.66574	6.9427	7.33142	7.62825
A_51_P275454	20128	Trim30a	tripartite motif-containing 30A	0.553361	1.5713	1.57934	0.670657	2.39934	2.41187	0.434921	1.84989	1.82171	-0.682768	0.179232	0.000322982	7.39482e-10	6.86499e-10	4.66402e-05	1.31016e-12	1.20997e-12	0.00248042	6.6623e-11	8.37348e-11	3.84419e-05	0.158616	12.1836	12.737	13.7549	13.763	12.3629	12.7978	14.2128	14.1846	11.5009	12.1715	13.9002	13.9127
A_55_P2052555	65254	Dpysl5	dihydropyrimidinase-like 5	0.362321	1.87794	1.57923	0.0856055	1.75377	1.39529	0.151177	1.98707	2.2583	0.0407752	0.120635	0.00178422	1.76938e-12	2.43903e-11	0.389275	5.00995e-12	1.54639e-10	0.137729	7.46078e-13	1.04262e-13	0.678953	0.230353	10.4742	10.8365	12.3522	12.0535	10.5949	10.746	12.5819	12.8532	10.515	10.6006	12.2688	11.9103
A_51_P140321	68591	Mocos	molybdenum cofactor sulfurase	0.383879	1.66358	1.57758	0.426602	1.89516	1.89267	0.369494	1.54874	1.43012	-0.0719349	-0.0639154	4.90894e-05	7.40125e-14	1.67929e-13	1.52824e-05	9.8138e-15	1.00162e-14	7.3526e-05	2.23121e-13	7.58545e-13	0.317371	0.372722	11.2929	11.6767	12.9564	12.8704	11.2289	11.5984	12.7777	12.6591	11.2209	11.6475	13.1161	13.1136
A_55_P1984556	20293	Ccl12	chemokine (C-C motif) ligand 12	0.228315	2.42321	1.57534	0.267924	2.38488	2.04671	0.00965103	2.25404	1.52621	2.02852	0.0888647	0.0106062	1.46235e-15	1.1448e-12	0.00371341	1.87564e-15	2.02629e-14	0.904116	4.52061e-15	1.85723e-12	2.32721e-14	0.276473	6.57007	6.79839	8.99328	8.14542	6.65894	6.66859	8.91298	8.18515	8.5986	8.86652	10.9835	10.6453
A_55_P2024595	380753	Atxn7l1	ataxin 7-like 1	0.147149	1.36713	1.57469	-0.018888	1.21292	1.27297	0.0999553	1.24477	1.49435	-0.035476	0.0289226	0.051158	1.53744e-12	1.7583e-13	0.790063	9.47384e-12	4.55649e-12	0.171304	6.39986e-12	3.93548e-13	0.61806	0.683977	8.0012	8.14835	9.36832	9.57588	8.03012	8.13007	9.27489	9.52446	7.96572	7.94683	9.17864	9.23869
A_55_P2156800	68509	Ptx4	pentraxin 4	0.133361	0.835157	1.5745	0.0801428	0.436746	1.29563	0.203136	0.380656	0.9063	0.0303298	-0.138883	0.625316	0.00667132	2.41208e-05	0.768618	0.122602	0.000186041	0.459241	0.174547	0.00382237	0.911247	0.611185	6.47812	6.61148	7.31328	8.05262	6.33924	6.54238	6.7199	7.24554	6.50845	6.58859	6.9452	7.80408
A_55_P2337416	77312	C030010L15Rik	RIKEN cDNA C030010L15 gene	0.211756	1.36458	1.57332	0.248167	1.00557	1.04101	0.174281	0.993716	1.23033	-0.0981831	0.047289	0.0328552	8.15444e-11	9.63804e-12	0.0146305	6.92176e-09	4.23249e-09	0.0725062	8.18509e-09	3.76919e-10	0.294638	0.608869	7.53772	7.74947	8.9023	9.11104	7.585	7.75929	8.57872	8.81533	7.43953	7.6877	8.44511	8.48054
A_55_P2093232	140781	Myh7	myosin, heavy polypeptide 7, cardiac muscle, beta	0.117516	2.22559	1.57312	0.00579835	3.17411	2.73278	-0.130233	1.66865	1.62393	0.0952031	-0.132114	0.350086	4.60951e-12	8.10152e-10	0.962702	1.96981e-14	1.99411e-13	0.301937	3.42096e-10	5.09486e-10	0.446869	0.295244	7.68397	7.80148	9.90955	9.25709	7.55185	7.42162	9.22051	9.17578	7.77917	7.78497	10.9533	10.5119
A_52_P657360	21952	Tnni1	troponin I, skeletal, slow 1	-0.0474324	1.08935	1.57294	-0.108214	0.504618	0.750095	0.0858178	0.285842	0.345937	-0.159574	-0.240693	0.614827	2.94056e-09	1.30639e-11	0.258881	5.39709e-05	4.88024e-07	0.366979	0.00703564	0.00179557	0.103621	0.0192585	7.6912	7.64377	8.78055	9.26415	7.45051	7.53633	7.73635	7.79645	7.53163	7.42341	8.03625	8.28172
A_55_P1966583	270757	Bpifc	BPI fold containing family C	0.313071	1.87076	1.57257	0.180177	1.67457	1.3434	0.241365	2.00542	2.04871	0.0630949	0.175137	0.0172659	3.68977e-11	4.83199e-10	0.145727	1.91766e-10	4.70049e-09	0.0573253	1.29799e-11	9.40197e-12	0.599556	0.156584	11.3922	11.7053	13.263	12.9648	11.5673	11.8087	13.5728	13.616	11.4553	11.6355	13.1299	12.7987
A_55_P1986552	84004	Mcam	melanoma cell adhesion molecule	0.370333	1.80053	1.56808	0.121549	1.4823	1.09459	0.213962	1.71491	2.01991	0.195203	0.168977	0.00190138	5.29676e-12	4.25141e-11	0.240391	9.83615e-11	8.03241e-09	0.0475987	1.10719e-11	9.18676e-13	0.0679519	0.109482	12.9457	13.316	14.7462	14.5138	13.1147	13.3286	14.8296	15.1346	13.1409	13.2624	14.6232	14.2355
A_52_P213889	209760	Tmc7	transmembrane channel-like gene family 7	0.223588	0.74032	1.56664	0.177729	0.175412	0.543683	0.112332	0.458198	1.26287	-0.408432	-0.0720102	0.00170236	1.29483e-09	1.55255e-14	0.00861768	0.00934579	9.80542e-08	0.0766807	9.23451e-07	4.33567e-13	3.8477e-06	0.242579	10.0708	10.2944	10.8111	11.6374	9.99877	10.1111	10.457	11.2616	9.66235	9.84008	9.83776	10.206
A_51_P446570	170442	Bbox1	butyrobetaine (gamma), 2-oxoglutarate dioxygenase 1 (gamma-butyrobetaine hydroxylase)	0.000797506	1.18721	1.5625	0.0339443	1.13841	1.37042	0.0825177	1.06846	0.897136	0.0245312	-0.0216144	0.992254	1.19374e-10	1.90721e-12	0.680272	2.22112e-10	1.3945e-11	0.32281	5.63578e-10	6.97176e-09	0.765546	0.792679	6.43324	6.43404	7.62044	7.99574	6.41162	6.49414	7.48008	7.30876	6.45777	6.49171	7.59617	7.82819
A_55_P2115832	19657	Rbmy	RNA binding motif protein, Y chromosome	-0.0241542	0.881009	1.5595	0.0942495	2.10925	1.89281	-0.0539661	1.19016	0.868059	0.053232	0.117769	0.902188	0.000331448	5.32262e-07	0.632725	8.89509e-09	4.01473e-08	0.783841	1.44324e-05	0.000380358	0.786703	0.551225	6.15532	6.13117	7.03633	7.71482	6.27309	6.21913	7.46326	7.14115	6.20855	6.3028	8.3178	8.10136
A_55_P2275057	18175	Nrap	nebulin-related anchoring protein	0.761047	1.40615	1.55774	0.831704	1.69459	1.90926	0.792621	0.664295	2.40552	-1.74713	1.01601	0.0285132	0.000410186	0.00015419	0.0181865	6.51499e-05	1.76967e-05	0.023351	0.0517994	1.10497e-06	4.7092e-05	0.00543893	9.62754	10.3886	11.0337	11.1853	10.6435	11.4362	11.3078	13.0491	7.88041	8.71211	9.575	9.78966
A_52_P116372	108954	Ppp1r15b	protein phosphatase 1, regulatory (inhibitor) subunit 15b	0.0994928	1.20875	1.55508	0.0732253	0.923619	1.0294	0.225334	1.37478	1.71998	0.196249	-0.162554	0.14211	2.97401e-12	6.22032e-14	0.272443	1.69116e-10	3.36531e-11	0.00300517	4.15629e-13	1.30427e-14	0.00774557	0.0226661	9.16834	9.26783	10.3771	10.7234	9.00578	9.23112	10.3806	10.7258	9.36459	9.43781	10.2882	10.394
A_51_P492047	52793	Fam3b	family with sequence similarity 3, member B	0.0136515	1.71557	1.55311	0.124656	1.59427	1.43155	0.0682166	1.54505	1.17933	-0.15386	-0.0225973	0.890305	7.79951e-12	3.48916e-11	0.219031	2.35649e-11	1.17623e-10	0.493864	3.77186e-11	2.00368e-09	0.133936	0.819512	6.41521	6.42887	8.13078	7.96832	6.39262	6.46083	7.93767	7.57194	6.26135	6.38601	7.85563	7.6929
A_52_P115541	74288	Spem1	sperm maturation 1	0.188458	1.28787	1.55187	0.254414	1.20913	0.836157	0.321726	1.37957	1.21926	-0.0847277	-0.297081	0.0710232	5.57367e-10	3.52345e-11	0.0189625	1.3949e-09	2.34276e-07	0.00453067	2.02899e-10	1.23611e-09	0.397294	0.00769335	7.08652	7.27498	8.37439	8.6384	6.78944	7.11117	8.16901	8.00871	7.00179	7.25621	8.21092	7.83795
A_55_P2359797	257632	Nod2	nucleotide-binding oligomerization domain containing 2	0.416946	0.896418	1.55116	0.280808	1.23128	1.57663	0.115597	1.062	1.67941	0.269624	0.106807	0.00755289	6.64843e-06	4.85682e-09	0.0561645	1.18899e-07	3.85082e-09	0.408971	8.25255e-07	1.55495e-09	0.065536	0.444785	6.81804	7.23499	7.71446	8.3692	6.92485	7.04045	7.98685	8.60426	7.08767	7.36847	8.31895	8.6643
A_52_P535484	74558	Gvin1	GTPase, very large interferon inducible 1	0.678919	1.63698	1.55052	0.547949	2.24953	2.27428	0.419549	1.99948	1.70388	-1.13202	0.318399	1.06971e-05	6.93932e-11	1.55349e-10	0.000110555	5.63931e-13	4.76785e-13	0.00128517	3.41056e-12	3.81478e-11	1.45345e-08	0.00924861	12.7394	13.4183	14.3764	14.2899	13.0578	13.4773	15.0573	14.7617	11.6074	12.1553	13.8569	13.8817
A_55_P1994817	70439	Taf15	TAF15 RNA polymerase II, TATA box binding protein (TBP)-associated factor	0.456513	1.09516	1.5503	-0.0360571	0.443868	0.632639	0.123574	0.58467	0.752282	1.25858	1.41353	0.0135482	5.71091e-06	6.65663e-08	0.829186	0.0158599	0.0014406	0.463239	0.00266082	0.000317333	1.03241e-06	2.29614e-07	9.40073	9.85725	10.4959	10.951	10.8143	10.9378	11.3989	11.5666	10.6593	10.6233	11.1032	11.292
A_52_P108346	17869	Myc	myelocytomatosis oncogene	0.55323	1.21043	1.54838	-0.0595417	0.812467	1.01033	0.537017	1.61754	2.14725	0.537972	0.208781	0.0197706	3.59578e-05	2.03051e-06	0.783903	0.00157428	0.000230308	0.023044	1.17588e-06	2.74791e-08	0.0228377	0.342728	12.3812	12.9344	13.5916	13.9296	12.59	13.127	14.2075	14.7372	12.9192	12.8596	13.7316	13.9295
A_55_P2020338	268297	Scml4	sex comb on midleg-like 4 (Drosophila)	0.0745244	1.54061	1.54793	0.0334137	1.86638	1.27258	0.175695	1.41948	1.59122	-0.164609	-0.304268	0.65274	6.1948e-08	5.80736e-08	0.839704	4.26642e-09	7.74218e-07	0.295781	1.86359e-07	3.98185e-08	0.326285	0.0797086	7.36723	7.44175	8.90784	8.91516	7.06296	7.23866	8.48244	8.65418	7.20262	7.23603	9.069	8.4752
A_51_P126835	212772	Arl14ep	ADP-ribosylation factor-like 14 effector protein	0.273631	1.40108	1.54737	0.0712171	0.835863	1.0466	0.300841	1.42754	1.66142	0.499547	-0.0284063	0.0115535	1.27751e-10	2.90402e-11	0.46841	1.90934e-07	8.75492e-09	0.00640502	9.67757e-11	9.95358e-12	8.81772e-05	0.770834	9.72306	9.99669	11.1241	11.2704	9.69465	9.99549	11.1222	11.3561	10.2226	10.2938	11.0585	11.2692
A_51_P492456	15116	Has1	hyaluronan synthase1	0.0571943	0.717363	1.54451	0.0853115	0.489909	0.939116	0.221755	0.777425	1.75561	0.454717	-0.479352	0.566211	1.72849e-06	3.92055e-11	0.395223	0.000129429	5.07748e-08	0.0374017	6.24492e-07	5.6888e-12	0.000268465	0.000160857	8.09269	8.14989	8.81005	9.6372	7.61334	7.83509	8.39076	9.36895	8.54741	8.63272	9.03732	9.48652
A_51_P390775	22194	Ube2e1	ubiquitin-conjugating enzyme E2E 1	0.0201666	1.18248	1.54411	0.00682758	0.995953	1.03287	0.101362	1.04029	1.36492	0.0398855	0.0115893	0.900907	1.53416e-06	4.61142e-08	0.966367	1.20991e-05	7.92102e-06	0.533886	7.28158e-06	2.42363e-07	0.805614	0.942945	13.5262	13.5464	14.7087	15.0703	13.5378	13.6392	14.5781	14.9027	13.5661	13.5729	14.562	14.599
A_55_P2099627	69358	Lrrc51	leucine rich repeat containing 51	-0.0248147	1.46418	1.54314	0.302026	1.18513	1.43198	0.0212912	1.36513	1.5392	-0.339121	-0.0991171	0.843859	2.8522e-09	1.33865e-09	0.0269865	5.51288e-08	3.92004e-09	0.865781	7.72863e-09	1.38902e-09	0.0147323	0.435697	8.8111	8.78629	10.2753	10.3542	8.71199	8.73328	10.0771	10.2512	8.47198	8.77401	9.65712	9.90396
A_55_P2011151	140765	Tmprss3	transmembrane protease, serine 3	0.3664	1.85711	1.54251	0.163004	1.73396	1.23957	0.0565831	2.0454	2.27701	0.0948228	0.182103	0.00273775	5.81268e-12	9.44249e-11	0.13471	1.63926e-11	2.31494e-09	0.591894	1.33669e-12	2.58038e-13	0.372918	0.0975192	9.70087	10.0673	11.558	11.2434	9.88297	9.93956	11.9284	12.16	9.79569	9.9587	11.5297	11.0353
A_55_P2122160	70599	Ssfa2	sperm specific antigen 2	0.210016	1.27933	1.54079	0.11898	1.55145	1.23854	0.427325	1.73553	1.79203	-0.156028	-0.0473873	0.205539	5.5076e-07	4.62953e-08	0.465483	4.21207e-08	8.34701e-07	0.0163205	8.84988e-09	5.62495e-09	0.341441	0.769675	9.38774	9.59776	10.6671	10.9285	9.34035	9.76768	11.0759	11.1324	9.23171	9.35069	10.7832	10.4703
A_51_P295192	18035	Nfkbia	nuclear factor of kappa light polypeptide gene enhancer in B cells inhibitor, alpha	0.374407	1.13991	1.53898	0.258902	0.789636	1.11251	0.259222	1.17704	1.48839	-0.0596553	0.174454	1.52083e-05	3.27736e-12	3.25496e-14	0.000641286	7.83768e-10	4.74342e-12	0.000634331	2.01164e-12	5.46131e-14	0.343747	0.0115615	15.9572	16.3316	17.0971	17.4962	16.1316	16.3909	17.3087	17.62	15.8975	16.1564	16.6872	17.01
A_55_P1967928	67222	Srfbp1	serum response factor binding protein 1	0.0441876	0.678449	1.53862	-0.0663869	0.331889	1.13566	0.162299	0.637546	1.50767	0.0893032	-0.0999309	0.462208	3.84793e-09	1.7183e-14	0.274459	3.67391e-05	1.84586e-12	0.0138157	9.2946e-09	2.35507e-14	0.147506	0.107893	11.7676	11.8118	12.4461	13.3062	11.6677	11.83	12.3052	13.1754	11.8569	11.7905	12.1888	12.9926
A_55_P2075230	407803	BC051226	cDNA sequence BC051226	0.588825	2.4345	1.53589	0.981307	2.43065	2.25764	0.790395	1.97105	1.78564	-0.404231	-0.300525	0.00254922	1.07213e-10	7.69848e-08	2.06766e-05	1.09758e-10	3.2669e-10	0.000200446	2.35115e-09	9.58828e-09	0.0259959	0.0867992	9.03106	9.61989	11.4656	10.5669	8.73054	9.52093	10.7016	10.5162	8.62683	9.60814	11.0575	10.8845
A_55_P1978597	66966	Trit1	tRNA isopentenyltransferase 1	0.270229	0.975856	1.53331	0.0666648	0.598954	1.13048	0.510892	1.14739	1.90595	-0.297731	-0.350728	0.0670877	2.64971e-06	6.46789e-09	0.634348	0.000498467	4.12132e-07	0.00190099	3.3955e-07	2.78384e-10	0.0459185	0.0214509	12.6659	12.9361	13.6417	14.1992	12.3152	12.826	13.4625	14.2211	12.3681	12.4348	12.9671	13.4986
A_52_P20906	22160	Twist1	twist basic helix-loop-helix transcription factor 1	0.0304136	1.92658	1.53235	0.156966	1.6632	1.17889	0.368407	2.38342	1.64737	-0.0845484	-0.200602	0.630539	1.23544e-15	4.34959e-14	0.0223388	1.22039e-14	2.44607e-12	2.14836e-05	4.40911e-17	1.41583e-14	0.191798	0.00523157	10.5803	10.6107	12.5069	12.1127	10.3797	10.7481	12.7631	12.0271	10.4958	10.6528	12.159	11.6747
A_55_P1993640	629678	Gm6994	predicted gene 6994	0.486059	1.78279	1.53112	0.222688	1.72987	1.34318	0.305594	1.77051	2.02968	0.0841604	0.175022	7.69602e-05	1.84516e-12	1.85208e-11	0.027966	2.92008e-12	1.31022e-10	0.00438044	2.05028e-12	2.52882e-13	0.374309	0.0756087	12.0333	12.5193	13.8161	13.5644	12.2083	12.5139	13.9788	14.238	12.1174	12.3401	13.8473	13.4606
A_51_P241861	27060	Tcirg1	T cell, immune regulator 1, ATPase, H+ transporting, lysosomal V0 protein A3	0.387204	1.84368	1.53036	0.566385	1.85744	1.61505	0.435152	1.96414	1.24417	0.239476	-0.0928398	3.91225e-05	1.24118e-14	2.21448e-13	4.07667e-07	1.10576e-14	9.65157e-14	1.05445e-05	4.63707e-15	5.24715e-12	0.0031265	0.196256	12.6292	13.0164	14.4729	14.1596	12.5364	12.9716	14.5005	13.7806	12.8687	13.4351	14.7262	14.4838
A_55_P2074591	319468	Ppm1h	protein phosphatase 1H (PP2C domain containing)	0.230794	1.15213	1.52828	0.182628	0.734437	1.10794	0.201844	0.817024	1.66001	-0.0135918	-0.15649	0.0702805	4.60884e-08	8.45402e-10	0.14432	1.38425e-05	7.85056e-08	0.109176	3.9465e-06	2.51927e-10	0.910441	0.206909	10.3226	10.5534	11.4747	11.8508	10.1661	10.3679	10.9831	11.8261	10.309	10.4916	11.0434	11.4169
A_52_P302395	240028	Lnpep	leucyl/cystinyl aminopeptidase	0.0569736	1.40256	1.52613	-0.00668381	1.58685	1.65126	-0.0877726	1.48806	1.43777	-0.296394	-0.167789	0.491713	9.97876e-12	2.77266e-12	0.935222	1.52975e-12	8.32532e-13	0.294402	4.07118e-12	6.85825e-12	0.00213226	0.0548372	10.3388	10.3957	11.7413	11.8649	10.171	10.0832	11.659	11.6087	10.0424	10.0357	11.6292	11.6936
A_52_P199633	209387	Trim30d	tripartite motif-containing 30D	0.393789	1.40382	1.52609	0.527657	2.31188	2.28594	0.487999	1.96986	1.15906	-0.630118	0.127645	0.00217079	6.96206e-10	2.0442e-10	0.000165791	3.86287e-13	4.59354e-13	0.000350799	4.45721e-12	1.08409e-08	2.57176e-05	0.253779	12.4459	12.8397	13.8497	13.972	12.5735	13.0615	14.5434	13.7326	11.8158	12.3434	14.1276	14.1017
A_55_P1974961	263406	Plekhg3	pleckstrin homology domain containing, family G (with RhoGef domain) member 3	0.28013	1.76854	1.52591	0.150423	1.52822	1.20656	0.17998	1.78649	1.93493	0.115011	0.142095	0.00591793	1.08464e-12	1.02239e-11	0.107618	9.99353e-12	3.39187e-10	0.0583068	9.29355e-13	2.73074e-13	0.210859	0.126897	12.7341	13.0142	14.5026	14.26	12.8762	13.0561	14.6627	14.8111	12.8491	12.9995	14.3773	14.0556
A_55_P2040026	16401	Itga4	integrin alpha 4	0.0104314	1.60318	1.52517	0.105401	1.98437	1.55947	0.0447423	1.88248	1.92378	0.374269	-0.425744	0.915675	2.02302e-11	4.27499e-11	0.29326	7.92805e-13	3.064e-11	0.650743	1.77454e-12	1.27412e-12	0.00140578	0.000464695	8.3541	8.36454	9.95728	9.87928	7.92836	7.9731	9.81084	9.85214	8.72837	8.83377	10.7127	10.2878
A_55_P2015405	667214	9930111J21Rik1	RIKEN cDNA 9930111J21 gene 1	0.347234	2.35523	1.51886	0.603011	2.82093	2.04179	0.447029	2.51931	1.8254	-0.120197	-0.180606	0.000266237	9.37505e-16	8.37853e-13	5.04755e-07	5.55308e-17	8.68871e-15	1.91545e-05	3.26934e-16	4.94063e-14	0.126296	0.0276411	7.50451	7.85174	9.85974	9.02337	7.3239	7.77093	9.84322	9.14931	7.38431	7.98732	10.2052	9.4261
A_55_P2040497	629750	Gm11517	ubiquitin A-52 residue ribosomal protein fusion product 1 pseudogene	-0.224379	0.495382	1.51868	0.0637354	0.671241	1.26522	0.118493	0.88521	1.54504	-0.278744	-0.419741	0.079812	0.000795142	1.04121e-09	0.602334	4.12467e-05	1.40876e-08	0.337788	1.62688e-06	8.10832e-10	0.033668	0.0029889	6.98521	6.76083	7.48059	8.50389	6.56547	6.68396	7.45068	8.11051	6.70647	6.7702	7.37771	7.97168
A_55_P1991778	71901	Fam219a	family with sequence similarity 219, member A	0.416357	1.6891	1.51592	0.294125	1.57566	1.3811	0.183964	1.92967	2.0906	-0.0575106	0.191415	0.000138041	9.47815e-13	4.92821e-12	0.00285914	2.73863e-12	2.01295e-11	0.0427249	1.22464e-13	3.5494e-14	0.500939	0.0359079	13.0616	13.4779	14.7507	14.5775	13.253	13.437	15.1827	15.3436	13.0041	13.2982	14.5797	14.3852
A_51_P442719	98910	Usp6nl	USP6 N-terminal like	0.186844	1.18393	1.51502	-0.0246433	0.627043	0.813963	0.156299	1.2634	0.98256	0.242576	0.128107	0.0157673	1.19018e-11	2.77097e-13	0.726169	1.12583e-07	2.98858e-09	0.0381751	4.45097e-12	1.92869e-10	0.00293999	0.0825472	8.72644	8.91328	9.91037	10.2415	8.85455	9.01085	10.118	9.83711	8.96902	8.94437	9.59606	9.78298
A_55_P2051254	19296	Pvt1	plasmacytoma variant translocation 1	0.351733	1.10601	1.51142	0.123589	0.521097	0.937331	0.198338	0.993138	1.39391	-0.293088	-0.0376795	0.00164154	2.55153e-09	2.57843e-11	0.202212	4.04506e-05	2.63424e-08	0.0487176	1.17639e-08	8.64481e-11	0.0061847	0.690458	12.0861	12.4379	13.1922	13.5976	12.0485	12.2468	13.0416	13.4424	11.7931	11.9166	12.3142	12.7304
A_52_P423174	235674	Acaa1b	acetyl-Coenzyme A acyltransferase 1B	0.210558	1.45362	1.51087	0.227537	1.64125	1.90656	0.301948	1.79636	1.7559	-0.465074	0.0341152	0.000921336	6.10883e-15	3.34693e-15	0.000466293	9.19586e-16	8.8023e-17	2.67718e-05	2.23839e-16	3.19816e-16	1.30544e-07	0.519919	11.5514	11.7619	13.005	13.0623	11.5855	11.8875	13.3819	13.3414	11.0863	11.3139	12.7276	12.9929
A_55_P2059090	72536	Tagap	T cell activation Rho GTPase activating protein	0.0607015	0.473126	1.51078	0.0454981	0.250771	1.09324	-0.0109554	0.172156	1.33601	0.0998673	-0.0189418	0.46161	2.40667e-05	2.94898e-12	0.579632	0.00669513	3.74114e-10	0.8934	0.0482677	1.89558e-11	0.232538	0.816881	10.4089	10.4696	10.882	11.9197	10.39	10.379	10.5621	11.726	10.5088	10.5543	10.7595	11.602
A_55_P2150786	68350	Mul1	mitochondrial ubiquitin ligase activator of NFKB 1	0.140701	1.18544	1.50758	0.155165	0.621266	1.16837	0.145309	1.15017	1.43515	-0.067927	-0.113422	0.163891	1.59867e-09	4.65457e-11	0.127166	8.43763e-06	1.97057e-09	0.151334	2.46958e-09	9.69636e-11	0.491206	0.256668	12.2707	12.4114	13.4562	13.7783	12.1573	12.3026	13.3075	13.5925	12.2028	12.358	12.8241	13.3712
A_55_P2044729	237940	Aoc2	amine oxidase, copper containing 2 (retina-specific)	0.138339	0.365633	1.50691	0.142725	0.415581	0.869102	0.0714388	0.563591	0.922835	-0.0874683	0.0261059	0.1824	0.00202799	7.20087e-11	0.169681	0.000706293	1.79263e-07	0.481934	3.52273e-05	8.01502e-08	0.391109	0.795822	8.75641	8.89475	9.12205	10.2633	8.78252	8.85396	9.34611	9.70535	8.66894	8.81167	9.08453	9.53805
A_51_P260504	226970	Arhgef4	Rho guanine nucleotide exchange factor (GEF) 4	0.0245226	0.278283	1.50403	0.0969057	-0.205882	1.06011	0.145317	-0.0497745	1.25503	-0.383017	0.0815641	0.813095	0.0149752	1.12077e-10	0.35636	0.0607947	1.74653e-08	0.173649	0.632254	1.58897e-09	0.00175318	0.43575	9.55256	9.57708	9.83084	11.0566	9.63412	9.77944	9.58435	10.8892	9.16954	9.26645	8.96366	10.2297
A_52_P671543	18976	Pomc	pro-opiomelanocortin-alpha	0.251968	1.19331	1.50333	0.187488	0.505292	0.699233	0.378493	0.589653	1.22105	-0.0639731	-0.0787514	0.260576	4.75815e-05	3.36633e-06	0.398268	0.0327193	0.00520061	0.0989843	0.0149092	3.71205e-05	0.770908	0.720193	9.28545	9.53742	10.4788	10.7888	9.2067	9.58519	9.79635	10.4277	9.22148	9.40897	9.72677	9.92071
A_55_P2169188	69216	Ccdc23	coiled-coil domain containing 23	0.524235	1.50303	1.50302	0.397203	1.22471	1.21659	0.317494	0.650605	0.548173	-0.820409	0.499656	0.00215413	1.54415e-08	1.54432e-08	0.0137209	2.49989e-07	2.72888e-07	0.0417717	0.000342833	0.00151639	3.25049e-05	0.00308994	9.05839	9.58262	10.5614	10.5614	9.55804	9.87554	10.2086	10.1062	8.23798	8.63518	9.46269	9.45457
A_55_P2060966	17454	Mov10	Moloney leukemia virus 10	0.31103	1.69434	1.50275	0.396749	2.12007	2.1471	0.0911091	1.41049	1.92773	-0.286891	0.111569	0.00134371	4.80685e-13	3.00852e-12	0.000148089	1.50776e-14	1.23843e-14	0.272423	7.8689e-12	6.58265e-14	0.00253123	0.183035	12.6165	12.9275	14.3109	14.1193	12.7281	12.8192	14.1386	14.6558	12.3296	12.7264	14.4497	14.4767
A_55_P2037787	100042341	Gm3798	predicted gene 3798	0.110047	1.36052	1.50224	0.156185	1.27634	1.19857	0.129505	1.52107	1.13328	-0.208664	-0.0944706	0.329629	1.36406e-09	3.21466e-10	0.172848	3.41822e-09	8.34896e-09	0.254012	2.67636e-10	1.83141e-08	0.0747923	0.400785	6.86316	6.97321	8.22368	8.3654	6.76869	6.89819	8.28976	7.90196	6.6545	6.81068	7.93083	7.85307
A_55_P1981494	14963	H2-Bl	histocompatibility 2, blastocyst	0.092833	1.21061	1.50034	0.161366	1.6775	2.17278	0.15474	1.32705	2.74269	-0.762689	-0.0838662	0.372554	2.37055e-09	1.02811e-10	0.130426	1.93785e-11	3.78222e-13	0.14582	6.26892e-10	1.03213e-14	1.25392e-06	0.419406	10.8176	10.9104	12.0282	12.318	10.7337	10.8885	12.0608	13.4764	10.0549	10.2163	11.7324	12.2277
A_55_P2017709	93842	Igsf9	immunoglobulin superfamily, member 9	0.254516	1.74943	1.4995	0.0941081	1.55714	1.19263	0.106294	1.90271	2.07601	0.0320709	0.140367	0.0120973	1.70467e-12	1.76464e-11	0.310725	9.99112e-12	5.29183e-10	0.254335	4.71383e-13	1.23241e-13	0.725902	0.138047	11.4812	11.7357	13.2306	12.9807	11.6216	11.7279	13.5243	13.6976	11.5133	11.6074	13.0704	12.7059
A_55_P2045682	54354	Rassf5	Ras association (RalGDS/AF-6) domain family member 5	0.235917	1.04623	1.49892	0.177248	0.726788	1.0726	0.226253	1.0044	1.44151	-0.0626069	-0.0830143	0.0209112	4.92258e-09	2.52995e-11	0.0721795	6.93558e-07	3.45179e-09	0.0258232	8.77277e-09	4.54188e-11	0.506058	0.380451	11.3385	11.5744	12.3847	12.8374	11.2554	11.4817	12.2599	12.697	11.2759	11.4531	12.0026	12.3485
A_51_P225793	72446	Prr5l	proline rich 5 like	0.180943	1.12391	1.49785	0.261099	1.11203	1.06589	0.159924	1.07552	1.60394	0.238067	-0.000884828	0.0304349	1.10341e-10	1.45274e-12	0.00347994	1.2917e-10	2.41669e-10	0.0520604	2.1164e-10	5.09601e-13	0.00656309	0.990873	10.1406	10.3215	11.2645	11.6384	10.1397	10.2996	11.2152	11.7436	10.3786	10.6397	11.4907	11.4445
A_55_P2035087	442801	Arhgef15	Rho guanine nucleotide exchange factor (GEF) 15	0.383119	1.82931	1.49643	-0.00313792	1.53986	1.07739	0.22393	2.02877	2.17498	0.214498	0.0128477	0.00708086	1.10938e-10	2.09521e-09	0.980124	1.38663e-09	1.99629e-07	0.0899031	2.36473e-11	8.28183e-12	0.10302	0.918765	10.2018	10.585	12.0312	11.6983	10.2147	10.4386	12.2435	12.3897	10.4163	10.4132	11.9562	11.4937
A_66_P100249	100039864	Snhg12	small nucleolar RNA host gene 12	0.386261	1.04608	1.49353	0.0527154	0.33627	0.900979	0.491055	1.02335	1.56005	0.322359	-0.161725	0.00045961	2.55022e-09	1.33316e-11	0.556996	0.00150588	2.10449e-08	4.20734e-05	3.49336e-09	6.90059e-12	0.00210058	0.0844562	12.6529	13.0392	13.699	14.1464	12.4912	12.9822	13.5145	14.0512	12.9753	13.028	13.3115	13.8762
A_51_P497882	78284	Creb3l4	cAMP responsive element binding protein 3-like 4	0.189564	1.22242	1.49174	0.00777063	0.646457	0.876101	0.178811	0.95852	1.44222	0.199243	0.0120918	0.0822259	2.37678e-09	1.29669e-10	0.940326	1.04696e-05	2.3814e-07	0.0994155	7.1445e-08	2.13641e-10	0.0690671	0.907277	8.49382	8.68339	9.71624	9.98556	8.50591	8.68473	9.46443	9.94813	8.69307	8.70084	9.33952	9.56917
A_55_P2157360	380608	Tagap1	T cell activation GTPase activating protein 1	-0.0559165	0.435079	1.49055	-0.100144	0.284466	1.19476	0.105061	0.591762	1.27288	0.0734664	-0.0820457	0.419582	8.4001e-06	2.45475e-13	0.157374	0.000668183	7.19753e-12	0.139199	1.76775e-07	2.7516e-12	0.292524	0.241807	10.0658	10.0098	10.5008	11.5563	9.98372	10.0888	10.5755	11.2566	10.1392	10.0391	10.4237	11.334
A_55_P2005585	83925	Trps1	trichorhinophalangeal syndrome I (human)	0.368887	1.66109	1.48663	-0.0508714	1.4837	0.918623	0.0853099	1.88082	1.27299	0.0217845	0.433962	0.0165502	2.10914e-09	1.02324e-08	0.716662	1.05195e-08	5.61039e-06	0.544323	3.46288e-10	8.70668e-08	0.876282	0.006225	10.9303	11.2992	12.5914	12.4169	11.3642	11.4495	13.2451	12.6372	10.9521	10.9012	12.4358	11.8707
A_55_P2042184	100041175	Gm3181	predicted gene 3181	0.103574	1.25821	1.48432	-0.0606454	1.03586	0.915353	0.0627776	1.29397	1.18472	-0.348454	-0.0573123	0.413164	2.23753e-08	2.16082e-09	0.6294	3.098e-07	1.51228e-06	0.617494	1.51436e-08	5.12633e-08	0.0122131	0.648223	7.717	7.82057	8.97521	9.20132	7.65969	7.72247	8.95366	8.84441	7.36855	7.3079	8.4044	8.2839
A_66_P115236	100040049	1810010D01Rik	RIKEN cDNA 1810010D01 gene	0.180939	0.311121	1.4821	0.118748	0.390959	1.54752	0.149223	0.505697	1.10508	-0.846906	0.0716334	0.0819819	0.00571018	7.05412e-11	0.240769	0.00102131	3.70009e-11	0.145351	9.19143e-05	5.10388e-09	1.99048e-07	0.472962	8.06509	8.24603	8.37621	9.54719	8.13673	8.28595	8.64242	9.2418	7.21819	7.33693	7.60915	8.76571
A_55_P1965000	230073	Ddx58	DEAD (Asp-Glu-Ala-Asp) box polypeptide 58	0.384142	1.4597	1.48189	0.444761	1.66844	1.43398	0.308704	1.02805	1.2585	-0.329926	0.10062	0.0706732	1.68553e-06	1.39567e-06	0.0395047	3.04553e-07	2.10198e-06	0.139154	9.26914e-05	1.00751e-05	0.115694	0.61875	14.5115	14.8956	15.9712	15.9934	14.6121	14.9208	15.6401	15.8706	14.1815	14.6263	15.85	15.6155
A_55_P1978521	626578	Gbp10	guanylate-binding protein 10	0.200646	1.86496	1.4817	0.315391	2.08174	2.00198	0.312545	2.22596	1.84386	-0.2456	0.0550374	0.156507	2.90146e-10	8.03172e-09	0.0328215	5.68532e-11	1.01718e-10	0.0342132	2.08395e-11	3.42991e-10	0.0875712	0.688722	8.12033	8.32098	9.9853	9.60203	8.17537	8.48791	10.4013	10.0192	7.87473	8.19012	9.95647	9.87671
A_52_P42834	30940	Usp25	ubiquitin specific peptidase 25	0.349903	1.83851	1.47845	0.375082	2.38187	1.9122	0.352278	2.13354	1.31586	0.021313	0.176062	0.00206271	1.90748e-12	5.13133e-11	0.00118316	3.55554e-14	1.04669e-12	0.00195724	1.94801e-13	2.88781e-10	0.825613	0.0829649	10.7029	11.0528	12.5414	12.1813	10.8789	11.2312	13.0125	12.1948	10.7242	11.0993	13.106	12.6364
A_66_P119376	239217	Kctd12	potassium channel tetramerisation domain containing 12	0.180036	1.36363	1.47807	0.190603	1.39346	1.30734	0.0201429	1.50515	1.3591	0.680976	0.0335852	0.035369	9.20136e-12	2.70952e-12	0.0270816	6.63181e-12	1.73808e-11	0.800227	2.05471e-12	9.67558e-12	1.96627e-07	0.673642	9.81429	9.99433	11.1779	11.2924	9.84788	9.86802	11.353	11.207	10.4953	10.6859	11.8887	11.8026
A_51_P269084	103172	Chchd10	coiled-coil-helix-coiled-coil-helix domain containing 10	0.194364	0.371038	1.47728	0.109239	-0.0462925	0.561879	0.22927	0.152026	1.9419	1.71371	-0.0663708	0.182549	0.0171719	1.33402e-08	0.4449	0.744229	0.000984912	0.119781	0.291856	2.6046e-10	1.61333e-09	0.640557	11.0169	11.2113	11.3879	12.4942	10.9505	11.1798	11.1026	12.8924	12.7306	12.8398	12.6843	13.2925
A_55_P2072403	64707	Suv39h2	suppressor of variegation 3-9 homolog 2 (Drosophila)	0.388376	1.63609	1.47727	0.280689	1.55772	1.30997	0.199998	1.79735	1.94153	0.0217373	0.180356	0.000421436	3.15145e-12	1.47942e-11	0.00553883	6.63927e-12	8.94842e-11	0.0363936	7.50344e-13	2.29427e-13	0.807008	0.0560892	12.0559	12.4443	13.692	13.5332	12.2363	12.4363	14.0337	14.1778	12.0777	12.3584	13.6354	13.3876
A_51_P484880	12125	Bcl2l11	BCL2-like 11 (apoptosis facilitator)	0.152173	1.63945	1.47534	0.246263	1.5084	1.26927	0.154914	0.944901	1.58413	0.264693	-0.105744	0.58154	1.71173e-05	5.45749e-05	0.376168	4.30357e-05	0.000249859	0.574822	0.00303699	2.51647e-05	0.342428	0.701012	8.42682	8.57899	10.0663	9.90216	8.32108	8.47599	9.26598	9.90521	8.69151	8.93778	10.1999	9.96078
A_51_P517001	211135	D130040H23Rik	RIKEN cDNA D130040H23 gene	0.0832263	0.491189	1.47396	0.032818	0.000140052	0.881183	0.253116	0.374252	0.948214	0.0611479	-0.0238639	0.415274	0.00015235	1.04381e-10	0.745816	0.998894	1.54925e-07	0.0217608	0.00172793	5.76274e-08	0.547518	0.813506	7.35468	7.43791	7.84587	8.82864	7.33082	7.58393	7.70507	8.27903	7.41583	7.44865	7.41597	8.29701
A_52_P612137	12395	Runx1t1	runt-related transcription factor 1; translocated to, 1 (cyclin D-related)	0.0796909	0.764598	1.47346	-0.0549601	0.540837	1.03899	-0.0849245	0.603202	1.19703	-0.302918	0.253795	0.480215	3.51186e-06	4.75576e-10	0.624891	0.000162	6.69909e-08	0.452347	5.27432e-05	9.43069e-09	0.0143724	0.0351988	12.0804	12.1601	12.845	13.5539	12.3342	12.2493	12.9374	13.5312	11.7775	11.7225	12.3183	12.8165
A_52_P502141	226098	Hectd2	HECT domain containing 2	0.25571	0.821506	1.47243	0.110975	0.616454	0.868774	-0.00480414	0.637008	0.754702	-0.0130281	0.229624	0.0136028	1.42001e-07	3.37844e-11	0.246131	5.4325e-06	6.6797e-08	0.959072	3.66133e-06	4.34435e-07	0.889347	0.0241715	9.7644	10.0201	10.5859	11.2368	9.99402	9.98922	10.631	10.7487	9.75137	9.86235	10.3678	10.6201
A_55_P2013043	20708	Serpinb6b	serine (or cysteine) peptidase inhibitor, clade B, member 6b	-0.0345619	1.67767	1.4707	0.184569	2.33127	2.38228	-0.0570144	1.63709	1.51621	-1.29135	-0.233453	0.674177	6.22578e-13	4.64164e-12	0.0362627	3.83597e-15	2.73761e-15	0.490083	9.05907e-13	2.92102e-12	3.30197e-11	0.0106632	10.5538	10.5192	12.2315	12.0245	10.3203	10.2633	11.9574	11.8365	9.26244	9.44701	11.5937	11.6447
A_51_P189272	319880	Tmcc3	transmembrane and coiled coil domains 3	0.710581	2.12691	1.4707	0.540011	1.66138	0.75842	0.760273	2.30428	1.66087	-0.0196813	-0.562619	1.63342e-08	1.12333e-15	3.43249e-13	6.52826e-07	5.23635e-14	6.53386e-09	6.31182e-09	3.20976e-16	5.26127e-14	0.776146	3.83953e-07	12.5142	13.2248	14.6411	13.9849	11.9516	12.7119	14.2559	13.6125	12.4945	13.0345	14.1559	13.253
A_55_P2008722	100041677	Gm13157	predicted gene 13157	0.252106	0.848154	1.46954	0.0541044	0.521567	1.08024	0.147779	0.660299	1.29403	0.129394	0.250146	0.0148586	9.43039e-08	3.55557e-11	0.565923	3.72549e-05	3.25032e-09	0.129012	2.40299e-06	2.35516e-10	0.18013	0.0155184	11.0354	11.2875	11.8835	12.5049	11.2855	11.4333	11.9458	12.5795	11.1647	11.2188	11.6863	12.245
A_52_P707503	208613	Tmem212	transmembrane protein 212	0.125346	0.539054	1.46717	-0.70496	-0.360555	0.546517	0.0362581	0.467523	1.29389	0.638052	-0.0920316	0.681159	0.0909119	0.0001645	0.0318094	0.246271	0.0869081	0.905155	0.138222	0.000537598	0.0491336	0.762608	6.32884	6.45419	6.8679	7.79601	6.23681	6.27307	6.70434	7.5307	6.9669	6.26194	6.60634	7.51341
A_55_P2079329	233060	Zfp382	zinc finger protein 382	0.325836	1.48005	1.46638	0.274366	1.3344	1.01964	0.282052	1.27202	1.02396	0.22688	-0.0591011	0.000157881	2.05585e-13	2.37153e-13	0.000778556	1.00838e-12	5.89845e-11	0.000611495	2.09479e-12	5.53785e-11	0.00350605	0.385567	7.94568	8.27151	9.42572	9.41206	7.88657	8.16863	9.15859	8.91054	8.17256	8.44692	9.50695	9.1922
A_55_P1967133	244416	Ppp1r3b	protein phosphatase 1, regulatory (inhibitor) subunit 3B	0.290283	1.65414	1.46636	0.301044	1.62436	1.41228	-0.0107903	1.88737	1.96191	-0.119852	0.234821	0.035157	6.22306e-10	3.54922e-09	0.0297073	8.10989e-10	6.05988e-09	0.932847	8.90531e-11	4.99916e-11	0.35591	0.0810735	11.3683	11.6585	13.0224	12.8346	11.6031	11.5923	13.4905	13.565	11.2484	11.5495	12.8728	12.6607
A_55_P2066409	14391	Gabpb1	GA repeat binding protein, beta 1	0.0956299	0.671469	1.46588	-0.0332117	0.152302	0.795444	0.0494631	0.517894	1.49391	0.0130549	-0.0703193	0.413625	2.34227e-05	8.28005e-10	0.774388	0.200045	3.23628e-06	0.669953	0.000337034	6.28271e-10	0.910189	0.545759	12.1892	12.2848	12.8607	13.6551	12.1189	12.1684	12.6368	13.6128	12.2023	12.1691	12.3546	12.9977
A_55_P2018017	22035	Tnfsf10	tumor necrosis factor (ligand) superfamily, member 10	0.949001	3.79003	1.46466	0.772146	3.66869	2.26203	0.751434	4.21322	1.98004	0.0652882	-0.0795851	1.05062e-08	7.44311e-18	1.85014e-11	1.77134e-07	1.24175e-17	2.38428e-14	2.53883e-07	1.40563e-18	1.86768e-13	0.469277	0.379638	6.2727	7.22171	10.0627	7.73737	6.19312	6.94455	10.4063	8.17316	6.33799	7.11014	10.0067	8.60002
A_55_P2019457	13807	Eno2	enolase 2, gamma neuronal	-0.135264	-0.0271225	1.46448	0.0185519	-0.144647	1.31512	-0.0481123	0.0841438	1.53016	-0.509587	0.10434	0.0718664	0.704097	5.82594e-13	0.794783	0.0559392	3.0135e-12	0.50261	0.247844	2.97007e-13	1.98802e-06	0.156431	11.2949	11.1596	11.2678	12.7594	11.3992	11.3511	11.4834	12.9294	10.7853	10.8039	10.6407	12.1004
A_51_P311038	235130	Adamts15	a disintegrin-like and metallopeptidase (reprolysin type) with thrombospondin type 1 motif, 15	-0.0475832	1.07424	1.46403	-0.00918448	0.897422	1.31859	0.11049	1.07548	1.12161	0.0849306	-0.0875026	0.60709	2.74731e-09	2.90177e-11	0.920609	3.44919e-08	1.38118e-10	0.24095	2.70226e-09	1.47603e-09	0.363097	0.349136	6.2127	6.16511	7.28694	7.67673	6.1252	6.23569	7.20068	7.24681	6.29763	6.28844	7.19505	7.61622
A_55_P2114834	667232	Gm8528	predicted gene 8528	0.117744	1.37965	1.46247	0.0438582	2.12468	2.3621	-0.0472786	1.38658	1.50496	0.0226425	-0.0232922	0.167456	1.39012e-11	5.75829e-12	0.597455	1.85635e-14	3.57382e-15	0.56947	1.28891e-11	3.72808e-12	0.78445	0.77844	6.14264	6.26038	7.52229	7.60511	6.11935	6.07207	7.50593	7.62431	6.16528	6.20914	8.28996	8.52739
A_51_P110301	12266	C3	complement component 3	-0.109791	0.869002	1.46213	-0.0219258	0.854763	1.70114	-0.0231997	1.49933	2.36115	-0.46989	-0.0160033	0.211456	1.96115e-08	9.86335e-12	0.798173	2.46685e-08	9.86183e-13	0.786749	6.74484e-12	6.23476e-15	4.33871e-05	0.85187	12.6982	12.5884	13.5672	14.1603	12.6822	12.659	14.1815	15.0433	12.2283	12.2064	13.0831	13.9294
A_52_P135873	100040381	Gm2744	predicted gene 2744	0.535188	1.17674	1.46164	0.377036	1.46076	1.55655	0.351499	1.54301	1.114	-0.440115	0.358414	0.000446475	4.55108e-08	2.15889e-09	0.0068362	2.17774e-09	8.68951e-10	0.0105885	9.8666e-10	9.58515e-08	0.00229522	0.00940943	12.6942	13.2294	13.8709	14.1558	13.0526	13.4041	14.5956	14.1666	12.2541	12.6311	13.7149	13.8106
A_55_P2031949	320705	Bend6	BEN domain containing 6	0.095342	1.63549	1.45875	0.0823923	1.2603	1.14074	0.130129	1.59871	1.34048	0.768775	-0.088237	0.345908	1.7984e-11	9.94922e-11	0.413663	8.54846e-10	3.59819e-09	0.203653	2.53177e-11	3.46996e-10	7.71679e-07	0.382071	8.5538	8.64914	10.1893	10.0126	8.46556	8.59569	10.0643	9.80605	9.32258	9.40497	10.5829	10.4633
A_51_P249867	67797	Snrnp48	small nuclear ribonucleoprotein 48 (U11/U12)	0.0285511	0.789542	1.45779	-0.115671	0.0817314	0.742359	0.171265	1.08647	1.59382	0.108706	-0.0558505	0.650799	9.39171e-10	9.10841e-14	0.0801795	0.205333	2.2884e-09	0.0138136	8.18446e-12	2.28943e-14	0.0982692	0.380289	11.148	11.1765	11.9375	12.6057	11.0921	11.2634	12.1786	12.6859	11.2567	11.141	11.3384	11.999
A_51_P507622	233011	Itpkc	inositol 1,4,5-trisphosphate 3-kinase C	0.0801456	0.741513	1.45578	0.0955607	0.106319	0.782763	0.148242	0.44345	1.2563	0.341004	0.380245	0.424054	1.14806e-06	9.54516e-11	0.342568	0.292621	5.75388e-07	0.148751	0.000341593	8.34493e-10	0.0030521	0.00131141	10.1755	10.2557	10.917	11.6313	10.5558	10.704	10.9992	11.8121	10.5165	10.6121	10.6228	11.2993
A_55_P1974542	232313	Gxylt2	glucoside xylosyltransferase 2	0.189574	1.48495	1.44846	0.128805	1.29099	1.12908	0.0576382	1.66721	1.86316	0.100653	0.26203	0.0762037	9.99682e-11	1.44591e-10	0.215938	7.84066e-10	5.39237e-09	0.572214	1.76918e-11	3.29205e-12	0.328985	0.0185956	10.6121	10.8016	12.097	12.0605	10.8741	10.9317	12.5413	12.7373	10.7127	10.8415	12.0037	11.8418
A_51_P284946	74194	Rnd3	Rho family GTPase 3	0.194356	1.14208	1.44291	0.0596659	1.2251	1.19789	-0.245564	0.905153	2.90437	-0.567254	0.189673	0.155022	1.7565e-07	7.05779e-09	0.652893	6.838e-08	9.2687e-08	0.0776644	3.40807e-06	2.10277e-13	0.000497454	0.164581	12.2114	12.4057	13.3534	13.6543	12.401	12.1555	13.3062	15.3054	11.6441	11.7038	12.8692	12.842
A_55_P2252251	257871	Olfr1372-ps1	olfactory receptor 1372, pseudogene 1	0.183704	1.50301	1.44288	0.11846	1.60191	1.57505	-0.0761944	1.02453	1.19723	0.112285	0.0079731	0.241875	3.20883e-08	5.61783e-08	0.444619	1.32323e-08	1.67607e-08	0.621023	4.627e-06	6.66638e-07	0.468294	0.958578	7.97278	8.15649	9.4758	9.41566	7.98075	7.90456	9.00528	9.17799	8.08507	8.20353	9.68698	9.66012
A_55_P2091836	216742	Fnip1	folliculin interacting protein 1	0.080236	0.854421	1.44275	0.0361469	0.581503	0.947659	0.0507354	0.786493	1.25503	0.0140012	0.166622	0.481399	9.95648e-07	7.4382e-10	0.749563	8.56836e-05	2.60888e-07	0.654634	2.7967e-06	5.52934e-09	0.901459	0.153957	12.0289	12.1091	12.8833	13.4716	12.1955	12.2462	12.982	13.4505	12.0429	12.079	12.6244	12.9905
A_55_P2105820	210544	Tbc1d31	TBC1 domain family, member 31	0.176136	0.552831	1.44224	-0.118228	-0.153119	0.117949	0.114836	0.33637	0.85192	0.858483	0.209257	0.234899	0.00136081	2.5605e-08	0.419512	0.299148	0.420584	0.432705	0.0315541	2.02498e-05	1.85726e-05	0.161938	10.7741	10.9503	11.327	12.2164	10.9834	11.0982	11.3198	11.8353	11.6326	11.5144	11.4795	11.7506
A_55_P2167525	268935	Scube3	signal peptide, CUB domain, EGF-like 3	-0.0979658	0.267987	1.43847	-0.0512254	0.134347	1.22841	-0.21833	0.445	1.22096	-0.242311	-0.121622	0.269682	0.00653117	1.59917e-11	0.558234	0.136485	1.68891e-10	0.0215469	9.0911e-05	1.84775e-10	0.0121715	0.17497	7.49988	7.40191	7.76786	8.93834	7.37825	7.15992	7.82325	8.59922	7.25756	7.20634	7.39191	8.48597
A_52_P161495	12053	Bcl6	B cell leukemia/lymphoma 6	0.0665856	1.26933	1.43844	0.118277	1.21332	1.01707	-0.152378	1.06969	1.16392	-0.0656234	0.0855113	0.265583	2.61477e-13	3.79184e-14	0.0572832	5.23091e-13	7.70115e-12	0.0178906	3.58362e-12	9.8881e-13	0.272283	0.157925	12.0713	12.1379	13.3406	13.5097	12.1568	12.0044	13.2265	13.3207	12.0057	12.124	13.219	13.0228
A_52_P799815	380863	Tmem171	transmembrane protein 171	0.17986	2.14166	1.43818	0.237514	2.7001	1.9253	0.328001	2.37402	1.9135	-0.802179	-0.57787	0.0355233	8.94648e-15	4.10639e-12	0.00795318	2.40269e-16	4.66977e-14	0.000704321	1.79777e-15	5.13552e-14	2.12173e-08	1.63046e-06	10.0806	10.2605	12.2223	11.5188	9.50277	9.83077	11.8768	11.4163	9.27846	9.51597	11.9786	11.2038
A_55_P2078428	226654	Tstd1	thiosulfate sulfurtransferase (rhodanese)-like domain containing 1	0.387391	1.48538	1.43684	0.438062	1.36819	1.16986	0.402984	1.46871	1.3344	-0.139774	-0.0307499	0.00117741	7.67792e-11	1.25792e-10	0.000402527	2.59355e-10	2.53212e-09	0.00084467	9.08182e-11	3.74618e-10	0.174046	0.758281	8.26046	8.64785	9.74584	9.6973	8.22971	8.63269	9.69842	9.5641	8.12068	8.55874	9.48887	9.29054
A_51_P230439	19024	Ppfibp2	PTPRF interacting protein, binding protein 2 (liprin beta 2)	-0.104135	0.743358	1.43317	0.147536	0.219157	0.640055	0.0696374	0.687748	0.950035	0.346433	-0.204866	0.361187	5.22334e-06	7.64382e-10	0.201644	0.0654712	2.91948e-05	0.538451	1.29974e-05	2.36977e-07	0.00654257	0.0830686	8.59504	8.49091	9.3384	10.0282	8.39018	8.45981	9.07792	9.34021	8.94147	9.08901	9.16063	9.58153
A_55_P2002757	17060	Blnk	B cell linker	0.225747	1.16363	1.43306	0.250342	0.800458	0.900927	-0.361376	0.49395	0.702896	1.83521	0.325714	0.377528	0.000256709	3.00916e-05	0.329146	0.00540598	0.0023124	0.165628	0.0645351	0.0122277	1.6362e-06	0.208878	6.6257	6.85144	7.78933	8.05876	6.95141	6.59004	7.44536	7.65431	8.46091	8.71125	9.26137	9.36184
A_55_P2057435	625237	Gm6566	predicted gene 6566	0.0695994	0.403101	1.43294	0.156319	0.411399	0.770286	0.181876	0.382555	0.957247	-0.0120149	-0.131132	0.404361	0.000144964	7.62916e-12	0.0724677	0.000118124	6.18483e-08	0.0398703	0.000241886	2.95952e-09	0.88429	0.126214	7.48964	7.55924	7.89274	8.92257	7.3585	7.54038	7.74106	8.31575	7.47762	7.63394	7.88902	8.24791
A_55_P2003951	73067	Tmem192	transmembrane protein 192	0.147725	0.856138	1.4325	0.179332	0.949109	1.29474	0.0786042	0.702034	1.39745	-0.168526	-0.0155621	0.080467	9.91486e-09	5.12976e-12	0.0377551	2.28713e-09	2.36124e-11	0.335364	1.51157e-07	7.4668e-12	0.0491732	0.84656	13.9138	14.0615	14.7699	15.3463	13.8982	13.9768	14.6003	15.2957	13.7453	13.9246	14.6944	15.04
A_51_P423549	20415	Shbg	sex hormone binding globulin	0.236773	1.60779	1.43209	0.0627852	0.225429	0.610556	0.279709	0.837687	1.64776	0.169408	0.0412446	0.489809	0.000200602	0.000589137	0.85366	0.510543	0.0871805	0.415991	0.0237163	0.0001576	0.619908	0.903528	6.77028	7.00705	8.37807	8.20238	6.81153	7.09123	7.64921	8.45928	6.93969	7.00247	7.16512	7.55025
A_55_P2067842	69104	March5	membrane-associated ring finger (C3HC4) 5	0.261386	1.28565	1.42814	0.0621403	1.34459	1.12156	0.181454	1.22255	1.10211	0.0398603	0.211032	0.0189897	8.5109e-10	1.82179e-10	0.543513	4.4236e-10	6.05557e-09	0.088809	1.7642e-09	7.75705e-09	0.695753	0.0512528	13.4442	13.7055	14.7298	14.8723	13.6552	13.8366	14.8777	14.7573	13.484	13.5462	14.8286	14.6056
A_55_P2113683	77300	Raph1	Ras association (RalGDS/AF-6) and pleckstrin homology domains 1	0.223143	0.51103	1.42786	0.0891355	0.516652	1.07504	0.0446153	0.569515	1.49828	-0.0592745	-0.234965	0.0272565	4.37058e-05	5.02383e-11	0.345928	3.88273e-05	3.21172e-09	0.633459	1.30739e-05	2.44247e-11	0.52753	0.0210493	13.6792	13.9024	14.1902	15.1071	13.4442	13.4889	14.0138	14.9425	13.6199	13.7091	14.1366	14.695
A_55_P2040121	321022	Cdv3	carnitine deficiency-associated gene expressed in ventricle 3	0.059524	0.684521	1.42656	0.138324	0.490965	0.834193	-0.0520639	0.364273	1.47094	0.00348546	-0.10555	0.427788	7.38092e-08	1.65423e-12	0.0770034	5.21622e-06	4.71161e-09	0.486903	0.00013964	1.0359e-12	0.962586	0.168445	12.3292	12.3888	13.0138	13.7558	12.2237	12.1716	12.588	13.6946	12.3327	12.4711	12.8237	13.1669
A_55_P2109589	55963	Slc1a4	solute carrier family 1 (glutamate/neutral amino acid transporter), member 4	0.361674	1.49204	1.42591	0.192384	1.20152	0.914561	0.24802	1.56716	1.79529	0.262853	0.155094	0.00072436	1.08557e-11	2.1494e-11	0.0412016	2.74882e-10	1.39316e-08	0.0113163	5.16103e-12	6.49453e-13	0.00793201	0.0923644	10.0449	10.4065	11.5369	11.4708	10.1999	10.448	11.7671	11.9952	10.3077	10.5001	11.5092	11.2223
A_52_P466147	71660	Rarres2	retinoic acid receptor responder (tazarotene induced) 2	0.043522	1.0637	1.42561	0.139032	2.56922	3.2845	0.0791147	1.13619	1.85067	-0.761117	-0.200938	0.557608	1.24477e-10	1.50911e-12	0.0738903	1.62853e-16	3.43408e-18	0.292452	4.66369e-11	2.71635e-14	1.56244e-08	0.0138651	10.8208	10.8643	11.8845	12.2464	10.6198	10.6989	11.756	12.4705	10.0597	10.1987	12.6289	13.3442
A_51_P347529	330721	Nek5	NIMA (never in mitosis gene a)-related expressed kinase 5	-0.0723155	1.37141	1.42517	-0.0189448	1.19638	1.23332	0.140575	1.39031	1.03763	0.00214418	-0.12828	0.419758	4.35962e-11	2.44979e-11	0.830968	3.30261e-10	2.11051e-10	0.127061	3.55181e-11	2.61252e-09	0.980711	0.161275	6.74175	6.66943	8.11316	8.16692	6.61347	6.75404	8.00378	7.6511	6.74389	6.72495	7.94027	7.97721
A_55_P2027012	20725	Serpinb8	serine (or cysteine) peptidase inhibitor, clade B, member 8	0.294056	1.6541	1.42442	0.202454	1.55131	1.2388	0.121259	1.69334	1.90235	0.0515466	0.263666	0.00691262	8.99555e-12	8.47504e-11	0.0486733	2.36599e-11	6.63456e-10	0.219285	6.30831e-12	1.07238e-12	0.594204	0.0134334	11.1083	11.4023	12.7624	12.5327	11.3719	11.4932	13.0653	13.2743	11.1598	11.3623	12.7111	12.3986
A_51_P417053	22156	Tuft1	tuftelin 1	0.0709199	0.678411	1.42441	0.0237765	0.60337	0.706863	0.150182	0.522738	1.35992	-0.0918774	-0.105994	0.644079	0.000367127	6.38725e-08	0.876533	0.00103334	0.000249309	0.333579	0.00318305	1.19463e-07	0.550413	0.491712	11.2271	11.2981	11.9055	12.6515	11.1211	11.2713	11.6439	12.4811	11.1353	11.159	11.7386	11.8421
A_55_P1985159	17258	Mef2a	myocyte enhancer factor 2A	0.319189	1.72239	1.41756	0.178311	1.50384	1.06073	0.123231	1.87931	1.99334	0.122929	0.223858	0.00347496	3.67991e-12	6.91275e-11	0.0735765	2.85727e-11	4.75881e-09	0.204234	9.73548e-13	3.94592e-13	0.205287	0.0287318	9.05549	9.37468	10.7779	10.4731	9.27935	9.40258	11.1587	11.2727	9.17842	9.35673	10.6823	10.2392
A_55_P2243431	100504486	Gdap10	ganglioside-induced differentiation-associated-protein 10	1.0184	1.76735	1.41597	0.974242	2.15112	1.78341	0.791625	1.84805	1.55952	-0.206951	0.248072	7.24858e-09	2.10104e-12	5.96078e-11	1.35273e-08	1.02972e-13	1.83031e-12	2.28923e-07	1.06252e-12	1.40039e-11	0.0391292	0.0160199	10.1854	11.2039	11.9528	11.6014	10.4335	11.2251	12.2816	11.993	9.9785	10.9527	12.1296	11.7619
A_51_P438821	66824	Pycard	PYD and CARD domain containing	-0.0719288	0.797915	1.41567	-0.0494519	1.00645	2.32134	0.0216278	1.07436	1.64025	0.914628	-0.0295553	0.53722	3.16425e-06	1.39807e-09	0.670409	1.62636e-07	8.61905e-13	0.851996	6.75469e-08	1.62034e-10	5.70301e-07	0.798851	8.51399	8.44206	9.3119	9.92965	8.48443	8.50606	9.55879	10.1247	9.42861	9.37916	10.4351	11.75
A_55_P1954156	72515	Wdr43	WD repeat domain 43	0.238577	1.31539	1.41087	0.242676	1.08277	1.01325	0.21948	1.30426	1.4814	0.149632	-0.248364	0.0498923	3.26392e-09	1.18998e-09	0.0465214	4.98231e-08	1.2241e-07	0.068741	3.68566e-09	5.8519e-10	0.201933	0.0421911	12.6524	12.891	13.9678	14.0633	12.4041	12.6236	13.7083	13.8855	12.8021	13.0448	13.8848	13.8153
A_55_P1981276	100040067	Gm2582	predicted gene 2582	0.216683	2.07095	1.40927	0.344522	2.40091	1.5821	0.227935	2.18936	1.271	-0.270994	-0.260759	0.086657	8.92197e-12	2.6336e-09	0.0104246	9.40929e-13	4.92439e-10	0.0728461	3.84095e-12	1.14122e-08	0.036479	0.0431489	7.63476	7.85144	9.70571	9.04403	7.374	7.60193	9.56336	8.64499	7.36376	7.70828	9.76467	8.94586
A_55_P2024689	229675	Rsbn1	rosbin, round spermatid basic protein 1	0.357311	1.02468	1.40867	0.147457	0.817683	1.41896	0.219069	1.52096	1.68492	0.213178	0.139957	0.00398336	4.86975e-08	5.32386e-10	0.184157	9.60063e-07	4.78599e-10	0.0558897	1.72333e-10	3.75589e-11	0.0620534	0.206242	9.13423	9.49154	10.1589	10.5429	9.27418	9.49325	10.7951	10.9591	9.3474	9.49486	10.1651	10.7664
A_55_P2007155	105387	Akr1c14	aldo-keto reductase family 1, member C14	-0.0420368	1.72864	1.40647	0.235727	2.34201	1.95953	0.00850708	1.62536	0.956292	-0.795552	0.170463	0.584445	1.35552e-13	3.19635e-12	0.00650629	1.21298e-15	1.94838e-14	0.911463	3.49981e-13	1.00351e-09	1.38698e-08	0.0379635	8.14667	8.10463	9.87531	9.55314	8.31713	8.32564	9.94249	9.27343	7.35112	7.58685	9.69312	9.31064
A_55_P2080850	19255	Ptpn2	protein tyrosine phosphatase, non-receptor type 2	0.0679816	0.952729	1.40628	0.10256	0.738064	1.14037	-0.0503084	0.749905	1.22965	-0.0234378	-0.0384314	0.490486	3.45778e-08	1.29392e-10	0.302838	1.01895e-06	2.75723e-09	0.608618	8.323e-07	9.28574e-10	0.810837	0.695168	12.1388	12.2067	13.0915	13.545	12.1003	12.05	12.8502	13.33	12.1153	12.2179	12.8534	13.2557
A_55_P2029370	269019	Stk32a	serine/threonine kinase 32A	-0.0108245	0.519095	1.40533	-0.0136164	0.388876	0.82057	-0.134439	0.269242	0.601141	0.295888	0.353811	0.947745	0.00571017	2.13993e-07	0.934297	0.0294993	0.00012209	0.420527	0.117335	0.001977	0.0876719	0.0449922	6.26615	6.25533	6.78525	7.67149	6.61996	6.48553	6.88921	7.22111	6.56204	6.54843	6.95092	7.38261
A_51_P189746	223775	Pim3	proviral integration site 3	-0.207026	0.473026	1.40148	-0.248124	1.04001	1.06677	-0.131603	0.812727	1.81563	-0.072908	-0.214168	0.0711321	0.000438098	6.43665e-10	0.0341323	4.42658e-08	3.12116e-08	0.236794	1.14564e-06	1.37574e-11	0.505588	0.0628144	10.4712	10.2642	10.9442	11.8727	10.2571	10.1255	11.0698	12.0727	10.3983	10.1502	11.4383	11.4651
A_55_P1968295	80708	Pacsin3	protein kinase C and casein kinase substrate in neurons 3	0.133667	0.493543	1.40127	0.12861	-0.0432316	0.856504	0.121217	-0.016145	1.13095	-0.300565	0.0168457	0.433991	0.00920768	3.04902e-07	0.451252	0.798491	0.000100761	0.477243	0.923974	4.53149e-06	0.0900854	0.920686	13.5474	13.6811	14.0409	14.9487	13.5642	13.6855	13.5481	14.6952	13.2468	13.3754	13.2036	14.1033
A_51_P400366	58176	Rhbg	Rhesus blood group-associated B glycoprotein	0.0382636	0.823446	1.40014	-0.0860491	0.904716	1.34891	-0.0695086	0.517212	0.700015	0.0307946	0.161459	0.652077	3.47364e-08	1.56915e-11	0.316892	9.36055e-09	2.74844e-11	0.416226	1.29506e-05	3.08775e-07	0.71639	0.0704867	6.40777	6.44603	7.23121	7.80791	6.56923	6.49972	7.08644	7.26924	6.43856	6.35251	7.34328	7.78747
A_55_P1973941	20539	Slc7a5	solute carrier family 7 (cationic amino acid transporter, y+ system), member 5	0.453239	0.883167	1.39977	0.014085	0.0641048	0.229824	0.488444	1.26669	0.821015	1.55001	0.155972	0.00419166	7.51711e-06	1.93508e-08	0.918622	0.643031	0.109838	0.00242877	7.63463e-08	1.74645e-05	4.60434e-09	0.267373	10.4365	10.8897	11.3196	11.8362	10.5924	11.0809	11.8591	11.4135	11.9865	12.0006	12.0506	12.2163
A_55_P2112599	56048	Lgals8	lectin, galactose binding, soluble 8	0.492639	1.75448	1.39898	0.45167	1.79514	1.40474	0.17831	1.90172	2.46229	-0.00759825	-0.0590941	0.000553148	6.23148e-11	1.73257e-09	0.00116747	4.42595e-11	1.63277e-09	0.138768	1.86308e-11	3.65396e-13	0.947869	0.612556	10.7445	11.2371	12.499	12.1435	10.6854	10.8637	12.5871	13.1477	10.7369	11.1886	12.532	12.1416
A_55_P2006008	66222	Serpinb1a	serine (or cysteine) peptidase inhibitor, clade B, member 1a	-0.180612	1.4556	1.39811	-0.241629	0.924249	1.28189	-0.154774	1.44102	1.01377	-0.118997	-0.0532328	0.0829619	9.46409e-11	1.72003e-10	0.024974	6.29385e-08	6.15761e-10	0.13253	1.09912e-10	1.76092e-08	0.240594	0.593066	10.2346	10.054	11.6902	11.6328	10.1814	10.0266	11.6224	11.1952	10.1156	9.87402	11.0399	11.3975
A_55_P1966194	56193	Plek	pleckstrin	0.137217	1.08563	1.39749	0.117984	0.333383	0.38668	0.136892	0.972344	1.11503	1.39915	0.0877583	0.083922	1.30984e-10	2.94097e-12	0.132548	0.000386214	9.06731e-05	0.0845922	6.62498e-10	8.80871e-11	2.88831e-12	0.255611	7.78558	7.9228	8.87121	9.18307	7.87334	8.01023	8.84568	8.98837	9.18473	9.30271	9.51811	9.57141
A_55_P2115458	101185	Pot1a	protection of telomeres 1A	0.275461	1.62289	1.39698	0.183483	1.57935	1.20809	0.161811	1.93337	1.93634	0.0547057	0.119068	0.0266978	1.61027e-10	1.44377e-09	0.12349	2.40593e-10	1.14542e-08	0.170823	1.17534e-11	1.14835e-11	0.634294	0.306941	9.58543	9.86089	11.2083	10.9824	9.7045	9.86631	11.6379	11.6408	9.64014	9.82362	11.2195	10.8482
A_55_P2000027	69982	Spink2	serine peptidase inhibitor, Kazal type 2	0.285436	1.52462	1.39436	0.315752	1.90122	2.09131	0.238987	1.23792	1.66847	-0.297392	-0.155032	0.0064484	1.67218e-11	6.37709e-11	0.00320642	5.82717e-13	1.34554e-13	0.0184865	3.71044e-10	4.27649e-12	0.00489806	0.108134	10.0866	10.3721	11.6112	11.481	9.93159	10.1706	11.1695	11.6001	9.78923	10.105	11.6904	11.8805
A_55_P2058122	229905	Ccbl2	cysteine conjugate-beta lyase 2	0.209727	1.42603	1.39265	0.268723	0.909644	0.375219	0.194765	1.05137	1.04341	0.712358	0.107355	0.0190098	6.9125e-12	9.89119e-12	0.00414722	5.21171e-09	0.000261152	0.0276427	6.46985e-10	7.22791e-10	1.52271e-07	0.200232	9.96412	10.1738	11.3901	11.3568	10.0715	10.2662	11.1228	11.1149	10.6765	10.9452	11.5861	11.0517
A_55_P2030568	112419	2010002M12Rik	RIKEN cDNA 2010002M12 gene	0.403891	1.48817	1.39257	0.301618	1.48911	0.996269	0.242335	1.38772	1.30397	-0.137565	0.155394	0.000233433	9.25191e-12	2.51608e-11	0.00281613	9.16391e-12	3.44501e-09	0.0120024	2.65128e-11	6.72806e-11	0.127158	0.0879292	9.54113	9.94502	11.0293	10.9337	9.69652	9.93886	11.0842	11.0005	9.40356	9.70518	10.8927	10.3998
A_51_P257934	24099	Tnfsf13b	tumor necrosis factor (ligand) superfamily, member 13b	0.0378006	0.659846	1.39244	0.128725	0.969875	1.23989	0.0789825	0.914022	0.983882	-0.0396612	-0.0711386	0.672301	1.28849e-06	3.7263e-11	0.161773	7.31396e-09	2.09239e-10	0.381344	1.68265e-08	5.9698e-09	0.657271	0.429349	6.8125	6.8503	7.47235	8.20494	6.74136	6.82035	7.65539	7.72525	6.77284	6.90157	7.74272	8.01273
A_55_P2029319	21948	Cd70	CD70 antigen	0.282602	0.617362	1.39043	-0.00399526	0.358949	0.835618	-0.0673352	0.245537	1.47361	-0.113596	-0.125096	0.0222478	4.68013e-05	1.31836e-09	0.971878	0.00542447	1.36027e-06	0.554656	0.0429043	5.66246e-10	0.323836	0.278833	6.4672	6.7498	7.08456	7.85762	6.3421	6.27477	6.58764	7.81572	6.3536	6.34961	6.71255	7.18922
A_55_P1984243	17948	Naip2	NLR family, apoptosis inhibitory protein 2	0.177111	1.4823	1.38547	0.179429	1.47113	1.55553	0.0999146	1.50369	1.07314	0.14993	-0.124928	0.0319062	1.43348e-12	4.01145e-12	0.0300211	1.609e-12	6.85546e-13	0.203267	1.15173e-12	1.85061e-10	0.0639478	0.11669	7.76834	7.94545	9.25064	9.15381	7.64341	7.74333	9.1471	8.71655	7.91827	8.0977	9.3894	9.4738
A_55_P2038767	76820	Fam49a	family with sequence similarity 49, member A	-0.0133233	0.556158	1.38339	0.115541	0.241319	0.867326	0.0601563	0.636564	1.72714	0.0735423	-0.252977	0.909577	0.00019415	2.32681e-09	0.331971	0.0530716	1.31118e-06	0.609537	4.8691e-05	9.03987e-11	0.533223	0.0437264	8.92375	8.91043	9.47991	10.3071	8.67078	8.73093	9.30734	10.3979	8.9973	9.11284	9.23861	9.86462
A_55_P2119441	67048	Vma21	VMA21 vacuolar H+-ATPase homolog (S. cerevisiae)	-0.052039	1.20966	1.38292	0.124712	1.32465	1.47425	-0.0993761	1.34867	1.46246	0.081179	-0.0823445	0.344408	1.66467e-13	2.10029e-14	0.0329861	4.09328e-14	7.77674e-15	0.0813739	3.09843e-14	8.81072e-15	0.148123	0.142761	12.4574	12.4053	13.667	13.8403	12.375	12.2757	13.7237	13.8375	12.5386	12.6633	13.8632	14.0128
A_55_P2098598	12226	Btg1	B cell translocation gene 1, anti-proliferative	0.367822	1.04974	1.3818	0.0615231	0.873502	1.21128	0.0897477	1.18649	1.85087	0.00239567	0.303389	0.00134704	7.15682e-09	1.32748e-10	0.5256	9.10449e-08	9.18095e-10	0.357946	1.23939e-09	1.62682e-12	0.980152	0.00562068	13.5935	13.9613	14.6432	14.9753	13.8968	13.9866	15.0833	15.7477	13.5958	13.6574	14.4694	14.8071
A_52_P282762	17874	Myd88	myeloid differentiation primary response gene 88	0.46478	2.20884	1.38127	0.585964	2.51726	1.7127	0.49857	2.57174	1.54458	-0.107133	0.0309115	7.94458e-07	7.54297e-17	1.13317e-13	3.65571e-08	9.67657e-18	4.03141e-15	3.20444e-07	6.90938e-18	2.00989e-14	0.0906712	0.610397	12.3062	12.7709	14.515	13.6874	12.3371	12.8357	14.9088	13.8817	12.199	12.785	14.7163	13.9117
A_55_P2068459	193740	Hspa1a	heat shock protein 1A	-0.181699	0.826602	1.37936	-0.183409	1.18326	1.35073	-0.228742	1.19511	1.51614	-0.312493	0.0599949	0.123342	1.57371e-06	1.4968e-09	0.120107	1.32844e-08	2.0256e-09	0.0574037	1.15526e-08	3.77651e-10	0.0129504	0.598476	9.68761	9.50591	10.5142	11.067	9.7476	9.51886	10.9427	11.2637	9.37511	9.1917	10.5584	10.7258
A_55_P2029061	21942	Tnfrsf9	tumor necrosis factor receptor superfamily, member 9	0.343591	1.7679	1.37864	0.251436	1.57045	1.24219	0.206505	2.0633	2.12928	0.0416013	0.123197	0.00698067	3.52088e-11	1.37657e-09	0.0377837	2.04997e-10	6.12675e-09	0.0813332	3.41632e-12	2.11567e-12	0.712646	0.28336	10.4598	10.8034	12.2277	11.8385	10.583	10.7895	12.6463	12.7123	10.5014	10.7529	12.0719	11.7436
A_51_P455807	98878	Ehd4	EH-domain containing 4	0.464109	1.87822	1.37812	0.344725	1.91666	1.28499	0.397685	1.64554	1.31785	0.0257622	-0.0882556	4.73467e-05	2.01985e-13	2.25633e-11	0.000839921	1.47819e-13	6.43197e-11	0.000228543	1.53545e-12	4.41105e-11	0.762947	0.308916	13.5873	14.0514	15.4655	14.9654	13.499	13.8967	15.1446	14.8169	13.613	13.9578	15.5297	14.898
A_52_P522427	209488	Hsh2d	hematopoietic SH2 domain containing	0.173301	1.72485	1.37808	0.329316	2.12472	1.96434	0.057456	1.45424	0.900424	0.132043	0.0837611	0.0243635	4.2094e-14	1.33098e-12	0.000232783	1.6447e-15	5.59052e-15	0.421684	5.84201e-13	7.76135e-10	0.0763779	0.246813	6.40035	6.57365	8.12519	7.77842	6.48411	6.54156	7.93835	7.38453	6.53239	6.8617	8.65711	8.49673
A_52_P322141	78317	Ccdc88b	coiled-coil domain containing 88B	0.622729	2.27052	1.37791	0.536608	1.99086	1.1627	0.571062	2.24978	1.35418	0.353372	-0.15121	1.29775e-05	1.67557e-13	3.17109e-10	6.67973e-05	1.25993e-12	3.72068e-09	3.42758e-05	1.92995e-13	4.09258e-10	0.00284793	0.151201	8.97893	9.60166	11.2494	10.3568	8.82772	9.39878	11.0775	10.1819	9.3323	9.86891	11.3232	10.495
A_55_P2292737	100504720	2310002F09Rik	RIKEN cDNA 2310002F09 gene	0.275391	1.50245	1.37786	0.13237	1.45428	1.20658	0.24041	1.88596	1.91901	-0.00619713	0.0649368	0.0196312	2.04316e-10	7.27457e-10	0.230356	3.30195e-10	4.92292e-09	0.0378432	6.80224e-12	5.22737e-12	0.95416	0.549251	12.2089	12.4843	13.7113	13.5868	12.2738	12.5142	14.1598	14.1928	12.2027	12.3351	13.657	13.4093
A_52_P21	69480	Ttc9	tetratricopeptide repeat domain 9	-0.0399724	0.660702	1.37699	0.109366	0.326038	0.734451	0.326728	0.99116	1.73262	-0.119282	-0.309177	0.547679	2.40931e-08	4.73855e-13	0.112353	0.000131291	5.45478e-09	0.00012853	6.89535e-11	1.36276e-14	0.085584	0.000221565	9.62232	9.58235	10.283	10.9993	9.31314	9.63987	10.3043	11.0458	9.50304	9.61241	9.82908	10.2375
A_66_P140974	194231	Cnksr1	connector enhancer of kinase suppressor of Ras 1	0.125104	1.75586	1.37686	0.0223585	1.62616	1.51839	0.269431	1.74165	1.24907	-0.043811	-0.231186	0.292436	6.56791e-11	2.319e-09	0.848161	2.05072e-10	5.61487e-10	0.0323599	7.41364e-11	9.27713e-09	0.708001	0.0614828	6.93836	7.06346	8.69422	8.31522	6.70717	6.9766	8.44882	7.95624	6.89454	6.9169	8.5207	8.41294
A_55_P2152359	98682	Mfsd6	major facilitator superfamily domain containing 6	-0.0520265	0.973094	1.3742	-0.0406595	0.882799	1.06471	0.0355433	0.699488	1.4643	-0.163853	-0.179892	0.704596	2.14906e-06	2.2764e-08	0.766804	6.9766e-06	6.91854e-07	0.795381	9.18714e-05	9.36643e-09	0.241848	0.200785	6.84196	6.78994	7.81506	8.21616	6.66207	6.69761	7.36156	8.12637	6.67811	6.63745	7.56091	7.74282
A_52_P102248	108797	Mex3b	mex3 homolog B (C. elegans)	0.182439	0.977457	1.37262	-0.0517213	0.223736	0.240453	0.168645	1.12111	1.31181	1.10766	-0.0409211	0.00479476	8.20188e-12	4.5144e-14	0.366881	0.00100935	0.000540046	0.0080484	1.01809e-12	9.09743e-14	1.22443e-12	0.473126	10.4859	10.6684	11.4634	11.8586	10.445	10.6137	11.5661	11.7568	11.5936	11.5419	11.8173	11.8341
A_55_P2072586	216233	Socs2	suppressor of cytokine signaling 2	0.118882	0.541039	1.37121	0.139492	0.348177	1.06242	0.166861	0.861915	1.24175	0.210203	-0.0311833	0.192268	1.32841e-05	4.36359e-11	0.129776	0.00107352	1.85836e-09	0.0741792	3.55081e-08	1.9063e-10	0.0285784	0.72563	6.66042	6.7793	7.20146	8.03164	6.62924	6.7961	7.49115	7.87099	6.87063	7.01012	7.2188	7.93305
A_51_P127681	29876	Clic4	chloride intracellular channel 4 (mitochondrial)	0.169601	1.21506	1.37052	0.012019	1.29491	1.26281	0.190197	1.73422	1.43235	-0.154365	0.287891	0.0647357	1.91651e-10	3.19311e-11	0.88991	7.45546e-11	1.08291e-10	0.0408793	9.00783e-13	1.64531e-11	0.0898411	0.00394583	14.5308	14.7004	15.7458	15.9013	14.8187	15.0089	16.5529	16.251	14.3764	14.3884	15.6713	15.6392
A_51_P511315	19200	Pstpip1	proline-serine-threonine phosphatase-interacting protein 1	-0.0845432	1.59641	1.36906	0.0975506	1.87082	1.66957	-0.0582051	1.65862	0.804209	0.112264	-0.388692	0.346356	4.27195e-12	4.33066e-11	0.279454	3.78552e-13	2.16047e-12	0.513632	2.3884e-12	8.88128e-08	0.215968	0.000401243	8.67962	8.59508	10.276	10.0487	8.29093	8.23272	9.94955	9.09514	8.79189	8.88944	10.6627	10.4615
A_55_P2018949	69754	Fbxo7	F-box protein 7	0.194226	1.40729	1.36856	0.225449	1.27969	1.2957	0.0768624	1.06695	1.23781	-0.115452	0.0756162	0.0106995	5.53696e-13	8.49152e-13	0.00405403	2.36768e-12	1.95879e-12	0.269485	3.69398e-11	3.92778e-12	0.105107	0.277028	12.381	12.5752	13.7883	13.7495	12.4566	12.5335	13.5236	13.6944	12.2655	12.491	13.5452	13.5612
A_51_P159503	672511	Rnf213	ring finger protein 213	1.06731	1.81889	1.36583	0.951426	2.21002	1.89255	0.879473	2.33117	1.57196	-0.232893	0.260175	3.33991e-08	1.45297e-11	1.01345e-09	1.58746e-07	7.52084e-13	7.97804e-12	4.46871e-07	3.31594e-13	1.28776e-10	0.0460656	0.0280373	13.6326	14.6999	15.4515	14.9984	13.8928	14.7722	16.2239	15.4647	13.3997	14.3511	15.6097	15.2923
A_51_P337944	140780	Bmp2k	BMP2 inducible kinase	0.533984	1.30448	1.36427	0.0399848	1.40207	1.40849	0.248224	1.68813	1.99438	0.160414	0.350604	8.05322e-05	8.54272e-10	4.44107e-10	0.699096	2.97316e-10	2.77985e-10	0.0266232	1.87385e-11	1.49572e-12	0.134027	0.00331896	11.3595	11.8935	12.664	12.7238	11.7101	11.9583	13.3983	13.7045	11.5199	11.5599	12.922	12.9284
A_51_P505823	71946	Endod1	endonuclease domain containing 1	0.32814	1.81941	1.36218	0.406292	1.95667	1.57731	0.167536	1.65957	1.33114	0.413758	-0.0612891	0.00645116	9.5288e-12	7.04523e-10	0.00134425	3.16278e-12	8.11715e-11	0.129218	3.80054e-11	9.85258e-10	0.00115752	0.56645	11.5893	11.9174	13.4087	12.9514	11.528	11.6955	13.1875	12.8591	12.003	12.4093	13.9597	13.5803
A_52_P474089	12338	Capn6	calpain 6	-0.303506	0.755184	1.36204	-0.0288465	0.709784	0.961646	-0.156913	0.599541	0.956993	0.539635	-0.13106	0.00818466	1.30319e-06	3.87599e-10	0.777757	2.81307e-06	5.44409e-08	0.138094	2.0452e-05	5.81643e-08	6.43533e-05	0.210719	9.76651	9.46301	10.5217	11.1286	9.63545	9.47854	10.235	10.5924	10.3061	10.2773	11.0159	11.2678
A_52_P427174	80902	Zfp202	zinc finger protein 202	0.0732686	0.995945	1.36044	0.0717712	0.57424	0.827307	0.257191	1.06826	1.17666	0.0343754	-0.179368	0.270261	5.18514e-11	4.58136e-13	0.2798	1.34153e-07	8.01102e-10	0.0010267	1.81261e-11	4.20371e-12	0.599426	0.0130136	8.64528	8.71855	9.64123	10.0057	8.46592	8.72311	9.53418	9.64257	8.67966	8.75143	9.2539	9.50697
A_55_P2131820	381384	A530006G24Rik	RIKEN cDNA A530006G24 gene	0.272445	1.70706	1.35817	0.218527	1.61203	1.24617	0.166651	1.8718	2.03936	0.0426732	0.227591	0.0245999	5.03431e-11	1.45515e-09	0.0639084	1.18113e-10	4.99899e-09	0.148465	1.26235e-11	3.44497e-12	0.702493	0.0546924	10.7068	10.9793	12.4139	12.065	10.9344	11.1011	12.8062	12.9738	10.7495	10.968	12.3615	11.9957
A_52_P386627	73914	Irak3	interleukin-1 receptor-associated kinase 3	0.0193033	0.439226	1.35786	0.0821875	0.279575	0.95282	-0.0347501	0.420358	1.15221	0.292372	0.149223	0.795635	1.94597e-05	3.61593e-12	0.27878	0.00154554	7.13678e-10	0.641838	3.17125e-05	4.30626e-11	0.00107157	0.0587877	8.7738	8.7931	9.21302	10.1317	8.92302	8.88827	9.34338	10.0752	9.06617	9.14836	9.34574	10.019
A_52_P592909	67800	Dgat2	diacylglycerol O-acyltransferase 2	-0.00921673	-0.0833036	1.35695	0.11792	0.00619625	1.12012	0.00867152	0.0882115	1.68415	-0.235848	-0.0678421	0.905392	0.291341	6.7575e-12	0.142034	0.936306	1.19977e-10	0.910962	0.264859	2.49304e-13	0.00707792	0.387317	11.7725	11.7633	11.6892	13.1294	11.7046	11.7133	11.7929	13.3888	11.5366	11.6546	11.5428	12.6568
A_55_P2028159	73205	3110043O21Rik	RIKEN cDNA 3110043O21 gene	0.135025	0.797802	1.3565	0.0234399	0.200279	0.740431	0.15092	1.16023	1.56792	0.0766489	0.0839401	0.104143	2.30878e-08	1.00507e-11	0.768613	0.0211996	6.43735e-08	0.0720963	1.04559e-10	1.11132e-12	0.342446	0.299874	11.7083	11.8433	12.5061	13.0648	11.7922	11.9431	12.9525	13.3601	11.7849	11.8084	11.9852	12.5254
A_51_P502119	109821	F11	coagulation factor XI	-0.0287863	0.817764	1.35539	0.0535252	1.04261	0.730639	0.148948	0.487238	1.00638	-0.112181	-0.0333898	0.874656	0.000331902	1.23444e-06	0.769503	2.77155e-05	0.000907303	0.419121	0.0154299	4.08095e-05	0.541016	0.854839	6.78004	6.75125	7.5978	8.13543	6.74665	6.8956	7.23389	7.75303	6.66786	6.72138	7.71046	7.3985
A_55_P2008042	100038554	Gm15348	predicted gene 15348	0.406081	1.3629	1.35484	0.246095	0.902827	1.20134	0.233552	1.27709	1.66447	-0.264698	0.108385	2.75397e-05	1.66132e-12	1.81877e-12	0.00286837	7.85032e-10	1.12835e-11	0.00418317	4.47059e-12	7.70457e-14	0.00163868	0.140704	10.671	11.0771	12.0339	12.0258	10.7794	11.0129	12.0565	12.4439	10.4063	10.6524	11.3091	11.6076
A_55_P2047188	14164	Fgf1	fibroblast growth factor 1	0.165712	0.900119	1.34847	0.22741	0.554953	1.09356	0.163177	0.600982	1.1147	0.480403	-0.221811	0.0717354	1.55092e-08	4.38796e-11	0.0176313	8.18345e-06	9.65625e-10	0.0757505	3.1543e-06	7.30833e-10	4.16534e-05	0.0201241	7.4379	7.60361	8.33802	8.78637	7.21609	7.37927	7.81707	8.33079	7.91831	8.14572	8.47326	9.01186
A_55_P1958678	14312	Brd2	bromodomain containing 2	0.300228	0.906454	1.34835	0.0700161	0.946433	1.27508	0.137339	1.32476	1.68733	-0.0610316	0.329054	0.0141593	3.54282e-07	1.46149e-09	0.529661	2.00739e-07	3.26421e-09	0.225721	1.88553e-09	5.39813e-11	0.583207	0.00819482	13.6819	13.9822	14.5884	15.0303	14.011	14.1483	15.3358	15.6983	13.6209	13.6909	14.5673	14.896
A_55_P1987284	404337	Olfr1383	olfactory receptor 1383	0.135081	1.1299	1.34703	0.0991533	1.54502	1.64427	0.0552953	1.11063	1.1557	0.0669845	-0.0815621	0.210445	8.75477e-09	7.02604e-10	0.352415	9.32346e-11	3.68242e-11	0.600557	1.11528e-08	6.36207e-09	0.526744	0.442271	7.10231	7.23739	8.23221	8.44934	7.02075	7.07604	8.13137	8.17645	7.16929	7.26845	8.71432	8.81356
A_55_P1994000	74718	Snx16	sorting nexin 16	-0.0200243	0.386383	1.34657	-0.0740959	0.115121	0.859048	0.0338566	0.333038	1.06069	-0.147963	0.0436527	0.739631	7.28763e-06	1.56546e-13	0.228886	0.0697927	1.42188e-10	0.575432	3.92256e-05	6.02334e-12	0.0238219	0.471694	11.7497	11.7297	12.1361	13.0963	11.7933	11.8272	12.1264	12.854	11.6017	11.5276	11.7168	12.4608
A_51_P221035	71281	Apobec4	apolipoprotein B mRNA editing enzyme, catalytic polypeptide-like 4 (putative)	0.0922196	1.69902	1.34523	0.0592094	2.85364	2.07355	0.0256992	2.26997	1.34136	0.0513104	-0.0207947	0.30269	1.50382e-12	5.12699e-11	0.503864	4.89099e-16	7.03874e-14	0.770418	1.73226e-14	5.35215e-11	0.561721	0.81324	6.14147	6.23369	7.84048	7.48669	6.12067	6.14637	8.39064	7.46203	6.19278	6.25199	9.04642	8.26633
A_51_P447668	19248	Ptpn12	protein tyrosine phosphatase, non-receptor type 12	0.112424	0.893787	1.34273	0.0290337	0.702422	0.750367	0.298601	1.35174	1.46058	0.291457	-0.0785654	0.0892485	1.60522e-10	3.41595e-13	0.646506	5.30824e-09	2.06459e-09	0.000197781	3.08212e-13	9.34476e-14	0.000249904	0.224129	11.4302	11.5426	12.324	12.7729	11.3516	11.6502	12.7033	12.8122	11.7216	11.7507	12.424	12.472
A_55_P1978241	11876	Artn	artemin	0.0212363	0.0542825	1.34214	-0.191447	-0.823792	0.909443	0.0187971	0.0667074	1.65542	0.450695	0.135716	0.805569	0.531439	3.92836e-11	0.0385181	4.47114e-08	1.13316e-08	0.827492	0.443315	1.64524e-12	7.22114e-05	0.129414	8.37374	8.39498	8.42803	9.71588	8.50946	8.52826	8.57617	10.1649	8.82444	8.63299	8.00065	9.73388
A_51_P377760	24014	Rnasel	ribonuclease L (2', 5'-oligoisoadenylate synthetase-dependent)	0.40063	2.02417	1.33904	0.405882	2.51003	1.841	0.493415	2.15625	1.26682	0.0191842	0.153422	0.0496963	1.11053e-08	2.63859e-06	0.047112	5.06137e-10	4.14652e-08	0.0187947	4.54149e-09	5.16596e-06	0.920241	0.42791	8.83345	9.23409	10.8576	10.1725	8.98688	9.48029	11.1431	10.2537	8.85264	9.25852	11.3627	10.6936
A_52_P90507	211798	Mfsd9	major facilitator superfamily domain containing 9	0.244863	1.80318	1.33897	0.19128	1.59064	0.875348	0.0866923	1.74486	0.972812	-0.106105	0.146165	0.0136356	8.16372e-13	7.35673e-11	0.0458254	5.52074e-12	3.34829e-08	0.340813	1.34974e-12	7.67042e-09	0.247012	0.117415	7.64611	7.89097	9.44929	8.98508	7.79227	7.87897	9.53714	8.76509	7.54	7.73128	9.13064	8.41535
A_55_P1954820	52392	D1Ertd622e	DNA segment, Chr 1, ERATO Doi 622, expressed	0.227864	1.6025	1.33563	0.219118	1.56941	1.03198	0.153034	1.67107	1.57652	0.147872	-0.0242163	0.000604545	2.14684e-15	3.64692e-14	0.000850035	2.97257e-15	1.92583e-12	0.0113333	1.1162e-15	2.77021e-15	0.0138267	0.656579	11.1206	11.3485	12.7231	12.4562	11.0964	11.2494	12.7675	12.6729	11.2685	11.4876	12.8379	12.3005
A_55_P2172999	19249	Ptpn13	protein tyrosine phosphatase, non-receptor type 13	0.0486582	1.33573	1.3349	0.133432	2.18231	1.43808	-0.0714835	1.33813	0.83486	-0.044086	0.256832	0.543608	1.28585e-11	1.29809e-11	0.108245	6.83597e-15	4.20584e-12	0.375483	1.25155e-11	1.24089e-08	0.581716	0.00479616	9.45626	9.50492	10.792	10.7912	9.71309	9.64161	11.0512	10.548	9.41217	9.54561	11.5945	10.8503
A_51_P110759	20510	Slc1a1	solute carrier family 1 (neuronal/epithelial high affinity glutamate transporter, system Xag), member 1	-0.447742	-0.739517	1.33428	-0.166803	-0.220365	1.49297	-0.353334	-0.611888	1.22171	-0.743377	-0.196499	5.77319e-07	5.51322e-10	7.39675e-14	0.00881633	0.00118028	1.29634e-14	1.05546e-05	8.39909e-09	2.87911e-13	5.10908e-10	0.0028961	7.69957	7.25183	6.96005	9.03385	7.50307	7.14974	6.89118	8.72478	6.95619	6.78939	6.73583	8.44916
A_55_P2084251	16492	Kcna4	potassium voltage-gated channel, shaker-related subfamily, member 4	0.307341	1.52478	1.33401	0.0558404	1.5085	1.14856	0.137899	1.80251	2.00376	0.0463549	0.111434	0.0366243	5.22474e-09	3.3948e-08	0.683943	6.08461e-09	2.55557e-07	0.321191	4.66618e-10	9.78878e-11	0.735199	0.420236	10.2662	10.5735	11.791	11.6002	10.3776	10.5155	12.1801	12.3814	10.3125	10.3684	11.821	11.4611
A_55_P1956812	69640	Fam83g	family with sequence similarity 83, member G	0.207559	0.552124	1.33333	0.0379879	-0.0222575	0.868187	0.170655	0.569041	1.44018	0.209757	-0.0445246	0.0633557	7.24336e-05	8.71351e-10	0.719654	0.833212	3.37396e-07	0.120387	5.26659e-05	2.82044e-10	0.0608912	0.674225	6.71561	6.92317	7.26773	8.04894	6.67108	6.84174	7.24012	8.11126	6.92536	6.96335	6.90311	7.79355
A_51_P393078	68140	Tigd2	tigger transposable element derived 2	0.0735833	0.951304	1.33323	0.122091	0.65082	0.948363	0.049646	0.880908	1.0161	0.0606206	0.070922	0.232532	3.16684e-11	1.86047e-13	0.0562388	8.08548e-09	3.31732e-11	0.414748	9.97677e-11	1.17513e-11	0.32182	0.249108	10.5826	10.6561	11.5339	11.9158	10.6535	10.7031	11.5344	11.6696	10.6432	10.7653	11.294	11.5915
A_55_P2092904	107986	Ddb2	damage specific DNA binding protein 2	0.0915018	0.883485	1.32973	0.00356218	0.835681	1.09038	0.54822	1.18951	1.25383	-0.182037	-0.193136	0.619585	0.000167926	1.69942e-06	0.984519	0.000287492	1.80385e-05	0.00796595	6.58706e-06	3.50279e-06	0.328898	0.301183	9.46928	9.56078	10.3528	10.799	9.27615	9.82437	10.4657	10.53	9.28725	9.29081	10.1229	10.3776
A_51_P316523	16363	Irf2	interferon regulatory factor 2	0.692054	2.41098	1.32832	0.564246	2.08505	1.27473	0.390455	2.4475	1.45373	-0.00802504	0.155015	7.79788e-07	9.44178e-15	8.49276e-11	9.48331e-06	8.96793e-14	1.56473e-10	0.000441381	7.47314e-15	2.20322e-11	0.928821	0.0988834	9.63278	10.3248	12.0438	10.9611	9.78779	10.1782	12.2353	11.2415	9.62475	10.189	11.7098	10.8995
A_55_P2181341	13599	Ecel1	endothelin converting enzyme-like 1	0.0178703	0.101198	1.32713	0.0797036	0.0447984	0.740157	0.109147	0.59384	1.67845	0.135819	-0.181346	0.864267	0.339945	7.97505e-10	0.449796	0.669037	2.24076e-06	0.304508	2.95132e-05	2.46485e-11	0.205415	0.0971368	6.93522	6.95309	7.03642	8.26234	6.75387	6.86302	7.34771	8.43233	7.07104	7.15074	7.11583	7.81119
A_55_P2065621	170833	Hook2	hook homolog 2 (Drosophila)	0.190713	1.10883	1.32683	0.316051	1.1104	1.35333	0.191773	0.967511	1.09563	-0.528689	0.0112782	0.00819461	8.16722e-12	5.29769e-13	0.000132976	7.99516e-12	3.91065e-13	0.00791318	6.33435e-11	9.78944e-12	3.26188e-07	0.860515	12.0234	12.2142	13.1323	13.3503	12.0347	12.2265	13.0022	13.1304	11.4948	11.8108	12.6052	12.8481
A_51_P461884	11352	Abl2	v-abl Abelson murine leukemia viral oncogene 2 (arg, Abelson-related gene)	0.189148	1.37496	1.32423	0.0810187	0.958103	0.817403	0.157713	1.47153	1.39773	0.0415324	-0.175867	0.0118512	6.86444e-13	1.22028e-12	0.241282	1.59819e-10	1.63046e-09	0.0308365	2.42023e-13	5.33599e-13	0.541476	0.0178355	11.6102	11.7993	12.9851	12.9344	11.4343	11.592	12.9058	12.832	11.6517	11.7327	12.6098	12.4691
A_55_P2175502	110958	M1ap	meiosis 1 associated protein	0.186295	1.44559	1.32409	0.25941	1.18866	1.00289	0.208631	1.30138	1.40526	0.489235	-0.322575	0.128573	1.35211e-09	4.76677e-09	0.0403442	2.17388e-08	2.18242e-07	0.0916272	6.09449e-09	2.03402e-09	0.000675235	0.0135663	8.89624	9.08254	10.3418	10.2203	8.57367	8.7823	9.87505	9.97893	9.38548	9.64489	10.5741	10.3884
A_51_P150302	54698	Crtam	cytotoxic and regulatory T cell molecule	-0.0495972	0.509458	1.3237	-0.0212071	0.295202	0.712167	0.0426137	0.506128	0.876575	-0.0589508	-0.108414	0.634703	0.000140904	7.74354e-10	0.83854	0.0108823	3.39603e-06	0.682828	0.000150427	2.43003e-07	0.572839	0.305503	6.73812	6.68852	7.24757	8.06181	6.6297	6.67232	7.13583	7.50628	6.67916	6.65796	6.97437	7.39133
A_55_P1994882	232236	Ccdc174	coiled-coil domain containing 174	0.272264	0.881102	1.32351	0.167198	0.402341	0.768352	0.175972	0.619839	1.34733	-0.116292	-0.0258821	0.0232959	4.82755e-07	1.78897e-09	0.142887	0.00192816	2.71637e-06	0.124405	3.30072e-05	1.38278e-09	0.29966	0.814444	11.8627	12.1349	12.7438	13.1862	11.8368	12.0128	12.4566	13.1841	11.7464	11.9136	12.1487	12.5147
A_55_P2028243	67713	Dnajc19	DnaJ (Hsp40) homolog, subfamily C, member 19	0.290192	1.59081	1.31935	0.122209	1.46966	0.951095	0.14929	1.83295	1.94727	0.241478	0.302973	0.021752	2.54784e-10	3.85115e-09	0.299971	8.12798e-10	3.4347e-07	0.209194	3.09949e-11	1.24751e-11	0.050399	0.0173348	9.6127	9.90289	11.2035	10.932	9.91567	10.065	11.7486	11.8629	9.85418	9.97639	11.3238	10.8053
A_51_P264825	16768	Lag3	lymphocyte-activation gene 3	-0.0416675	0.590375	1.31926	0.215195	0.498254	1.15742	0.0764406	0.470866	1.53908	-0.19678	-0.108468	0.728909	0.000134754	6.34289e-09	0.0873842	0.000664644	3.94306e-08	0.526784	0.00107842	6.91136e-10	0.115341	0.372211	6.76294	6.72128	7.35332	8.08221	6.65448	6.73092	7.12534	8.19355	6.56616	6.78136	7.06442	7.72358
A_66_P121086	26410	Map3k8	mitogen-activated protein kinase kinase kinase 8	0.725048	1.85588	1.31784	0.727967	1.96835	1.37152	0.806727	1.84072	1.24542	-0.21315	0.0239468	5.20965e-05	2.35229e-10	3.15802e-08	4.99076e-05	9.84607e-11	1.81561e-08	1.60566e-05	2.65446e-10	6.8464e-08	0.126972	0.858696	10.234	10.9591	12.0899	11.5519	10.258	11.0647	12.0987	11.5034	10.0209	10.7489	11.9892	11.3924
A_52_P508920	76184	Abca6	ATP-binding cassette, sub-family A (ABC1), member 6	0.0144708	0.639978	1.31623	-0.1129	0.320116	0.660311	-0.102532	0.486179	0.886445	0.16263	0.0180836	0.83105	5.27738e-08	1.38909e-12	0.110147	0.000201747	3.43647e-08	0.144039	1.917e-06	5.19768e-10	0.0269418	0.789845	6.15765	6.17213	6.79763	7.47388	6.17574	6.07321	6.66192	7.06218	6.32028	6.20739	6.6404	6.9806
A_55_P1963036	170719	Oxr1	oxidation resistance 1	0.0285149	0.51645	1.31511	0.0618188	0.448242	1.07904	0.153063	0.81313	1.45938	-0.0588349	0.0143373	0.786595	0.000137776	1.0045e-09	0.558957	0.000528722	1.68399e-08	0.158969	7.48113e-07	2.18841e-10	0.577889	0.891627	10.2086	10.2372	10.7251	11.5237	10.223	10.376	11.0361	11.6824	10.1498	10.2116	10.598	11.2288
A_55_P1974477	17686	Msh3	mutS homolog 3 (E. coli)	0.0360942	1.13472	1.31397	0.126478	0.995296	0.938501	0.16151	1.15152	1.18114	0.345435	0.0184812	0.749346	2.20318e-08	2.77749e-09	0.271523	1.31812e-07	2.87384e-07	0.16524	1.7957e-08	1.25909e-08	0.00677312	0.869894	10.1214	10.1575	11.2561	11.4353	10.1399	10.3014	11.2914	11.321	10.4668	10.5933	11.4621	11.4053
A_55_P2070079	16859	Lgals9	lectin, galactose binding, soluble 9	-0.0562347	1.2717	1.31062	0.307797	1.86724	2.3041	0.153228	1.69311	1.98864	-0.132053	-0.449239	0.64985	1.58757e-08	1.04063e-08	0.0222717	6.07381e-11	2.5491e-12	0.225608	2.59289e-10	2.36525e-11	0.293461	0.00198214	12.2894	12.2331	13.5611	13.6	11.8401	11.9933	13.5332	13.8288	12.1573	12.4651	14.0245	14.4614
A_55_P2108763	20684	Sp100	nuclear antigen Sp100	0.233549	1.38828	1.31002	0.214117	1.62422	1.73899	0.271274	1.64238	1.52394	-1.52043e-05	0.0127916	0.117375	3.70417e-08	8.1757e-08	0.148646	4.1042e-09	1.54022e-09	0.0725623	3.50183e-09	1.01227e-08	0.999915	0.928868	7.6298	7.86335	9.01808	8.93982	7.64259	7.91386	9.28497	9.16653	7.62978	7.8439	9.254	9.36877
A_55_P2209308	319610	9530083O12Rik	RIKEN cDNA 9530083O12 gene	0.307479	1.62085	1.30983	0.173197	1.48126	1.05321	0.148426	1.80172	1.91779	0.153053	0.245091	0.0182374	2.76271e-10	6.02423e-09	0.157866	1.03073e-09	1.22572e-07	0.222309	5.75712e-11	2.26008e-11	0.208897	0.0523307	9.86037	10.1678	11.4812	11.1702	10.1055	10.2539	11.9072	12.0232	10.0134	10.1866	11.4947	11.0666
A_52_P15388	17002	Ltf	lactotransferrin	0.10138	1.79217	1.30892	-0.116238	1.44585	1.1666	-0.0138932	1.30485	0.837042	0.0697675	0.0852582	0.330236	6.89473e-12	7.4045e-10	0.266522	1.71852e-10	3.89594e-09	0.892247	7.74847e-10	3.69109e-07	0.499403	0.410824	6.26639	6.36777	8.05856	7.57531	6.35164	6.33775	7.65649	7.18869	6.33615	6.21992	7.782	7.50276
A_51_P301994	52575	Trmt10c	tRNA methyltransferase 10C	0.303968	0.591111	1.30844	-0.0820124	0.197048	0.797938	0.239224	0.749702	1.34859	0.213389	0.164565	0.0272016	0.000231245	1.57026e-08	0.520979	0.134505	9.39493e-06	0.0737499	1.9206e-05	1.02801e-08	0.107151	0.206512	9.74069	10.0447	10.3318	11.0491	9.90526	10.1445	10.655	11.2538	9.95408	9.87207	10.1511	10.752
A_51_P125056	64059	Oxct2a	3-oxoacid CoA transferase 2A	-0.0130031	0.73153	1.30782	-0.0791445	0.336341	0.673856	0.0764261	0.654278	0.88415	0.0931107	-0.0947855	0.884471	3.61158e-07	1.0069e-10	0.382225	0.00153078	1.03881e-06	0.398399	1.50573e-06	2.81968e-08	0.30619	0.297862	6.42199	6.40899	7.15352	7.72981	6.32721	6.40363	6.98149	7.21136	6.5151	6.43596	6.85144	7.18896
A_55_P1959748	27053	Asns	asparagine synthetase	0.284234	0.895012	1.30705	0.12335	0.198764	0.40871	0.119162	0.612302	1.12527	0.795106	0.0100647	0.000102651	2.83384e-11	8.79409e-14	0.0406972	0.00247753	1.62991e-06	0.0471042	7.28297e-09	8.79891e-13	1.65333e-10	0.858036	14.9896	15.2738	15.8846	16.2966	14.9996	15.1188	15.6119	16.1249	15.7847	15.908	15.9834	16.1934
A_55_P2088490	71985	Acad10	acyl-Coenzyme A dehydrogenase family, member 10	0.134487	0.816745	1.30325	-0.0206386	0.567209	0.871668	0.0786709	0.966291	1.89566	0.00929666	-0.0580885	0.172375	2.02999e-07	2.83081e-10	0.829204	1.82573e-05	8.49241e-08	0.415583	2.06597e-08	1.01057e-12	0.922543	0.54582	10.8547	10.9892	11.6715	12.158	10.7967	10.8753	11.7629	12.6923	10.864	10.8434	11.4312	11.7357
A_55_P1994112	20357	Sema5b	sema domain, seven thrombospondin repeats (type 1 and type 1-like), transmembrane domain (TM) and short cytoplasmic domain, (semaphorin) 5B	0.208639	1.16054	1.3026	0.0688248	0.890668	0.616051	-0.118261	1.02635	1.11715	0.0888734	0.151771	0.00703079	1.10856e-11	1.92135e-12	0.322814	5.68201e-10	1.02508e-07	0.0988181	7.00564e-11	1.96873e-11	0.206305	0.0389802	6.18546	6.3941	7.34601	7.48807	6.33723	6.21897	7.36358	7.45438	6.27434	6.34316	7.165	6.89039
A_51_P288916	278279	Tmtc2	transmembrane and tetratricopeptide repeat containing 2	-0.171888	0.780618	1.30227	0.0902304	0.898044	1.19258	-0.16804	1.00495	1.30765	-0.124612	-0.404481	0.0757641	2.19152e-07	1.59896e-10	0.333542	3.29802e-08	5.83098e-10	0.0819045	6.8494e-09	1.50436e-10	0.1875	0.000393788	9.56527	9.39338	10.3459	10.8675	9.16079	8.99275	10.1657	10.4684	9.44066	9.53089	10.3387	10.6332
A_51_P322871	98402	Sh3bp4	SH3-domain binding protein 4	-0.191914	0.62609	1.3015	-0.339661	0.666179	0.933587	0.082137	0.919194	1.34211	-0.37973	-0.354459	0.0393232	1.79268e-06	6.9189e-11	0.00110493	8.20064e-07	8.66692e-09	0.350878	1.07861e-08	4.37351e-11	0.000416646	0.000769431	9.50714	9.31522	10.1332	10.8086	9.15268	9.23481	10.0719	10.4948	9.12741	8.78774	9.79358	10.061
A_55_P1990134	231430	Cox18	cytochrome c oxidase assembly protein 18	0.210724	1.36002	1.30065	0.206081	1.1385	1.03878	0.329991	1.54577	1.19515	0.237586	0.0624517	0.0251148	3.44053e-11	6.70426e-11	0.0279994	4.79608e-10	1.81688e-09	0.00136973	4.99039e-12	2.34977e-10	0.0132441	0.474336	11.6746	11.8853	13.0346	12.9753	11.7371	12.067	13.2828	12.9322	11.9122	12.1183	13.0507	12.951
A_51_P300572	22782	Slc30a1	solute carrier family 30 (zinc transporter), member 1	0.117766	0.769249	1.29887	-0.0698473	0.527295	0.688835	0.15451	0.898057	0.966811	0.0106243	-0.0146355	0.122598	1.23533e-08	5.66659e-12	0.347906	1.86805e-06	5.69116e-08	0.0482688	1.35939e-09	4.64484e-10	0.884879	0.841956	9.10132	9.21908	9.87057	10.4002	9.08668	9.24119	9.98474	10.0535	9.11194	9.04209	9.63924	9.80078
A_51_P272563	231713	Naa25	N(alpha)-acetyltransferase 25, NatB auxiliary subunit	0.245565	1.48483	1.29771	0.375796	1.48716	1.45914	0.231079	1.41595	1.49782	0.0231355	-0.199092	0.0120653	1.18491e-11	8.92074e-11	0.000520676	1.15725e-11	1.54172e-11	0.0169947	2.42281e-11	1.03892e-11	0.792958	0.0355744	12.3757	12.6213	13.8606	13.6734	12.1766	12.4077	13.5926	13.6745	12.3989	12.7747	13.886	13.858
A_55_P2057686	58804	Cdc42ep5	CDC42 effector protein (Rho GTPase binding) 5	-0.168735	0.549393	1.29753	0.0124599	0.508685	0.94826	0.0236616	0.644511	1.52417	-0.0992348	-0.335734	0.0792464	1.57395e-05	1.55492e-10	0.891591	3.70935e-05	1.43443e-08	0.79593	2.36754e-06	1.40225e-11	0.286468	0.0018403	11.6385	11.4697	12.1879	12.936	11.3027	11.3264	11.9472	12.8269	11.5392	11.5517	12.0479	12.4875
A_52_P77227	671564	Rnf212	ring finger protein 212	-0.154078	0.205835	1.29618	0.0300319	0.557589	0.743225	0.119017	1.50042	1.73356	0.245131	0.249763	0.629671	0.520686	0.000788318	0.92485	0.0943435	0.0307083	0.709124	0.000205902	4.69639e-05	0.445582	0.437194	6.92748	6.7734	7.13332	8.22366	7.17724	7.29626	8.67766	8.91081	7.17261	7.20264	7.7302	7.91584
A_55_P2069306	19253	Ptpn18	protein tyrosine phosphatase, non-receptor type 18	0.186158	1.25799	1.29421	0.0516146	1.0179	1.15327	0.0869585	1.07744	1.36352	0.435508	0.0411175	0.117272	6.14709e-09	4.10573e-09	0.652266	1.14836e-07	2.0829e-08	0.450443	5.31713e-08	1.94382e-09	0.00136152	0.719294	7.49898	7.68514	8.75697	8.79319	7.5401	7.62705	8.61754	8.90361	7.93449	7.9861	8.95239	9.08776
A_52_P255250	22644	Rnf103	ring finger protein 103	-0.054222	0.0654439	1.29323	-0.095442	-0.0190533	0.775999	-0.0897207	0.154523	1.62045	-0.0100102	-0.0623974	0.474883	0.390202	8.9179e-12	0.216096	0.800331	1.56422e-08	0.243581	0.0535041	2.85429e-13	0.894212	0.412142	7.60779	7.55357	7.67323	8.90102	7.54539	7.45567	7.69992	9.16584	7.59778	7.50234	7.57873	8.37378
A_51_P231549	243864	Mill2	MHC I like leukocyte 2	-0.0589999	1.20274	1.29122	0.21757	1.86367	2.049	0.035845	1.21486	1.27856	-0.648391	-0.146272	0.347473	1.37997e-12	4.65381e-13	0.00258447	1.5786e-15	3.58606e-16	0.564662	1.18395e-12	5.41324e-13	1.25668e-08	0.029016	8.18277	8.12377	9.38552	9.47399	8.0365	8.07235	9.25136	9.31506	7.53438	7.75195	9.39806	9.58339
A_55_P2020572	19192	Psme3	proteaseome (prosome, macropain) activator subunit 3 (PA28 gamma, Ki)	0.290462	1.5453	1.29109	0.119173	1.4282	1.02574	0.135294	1.66693	1.92444	0.143991	0.000244859	0.006648	1.9046e-11	2.76794e-10	0.218869	6.20237e-11	7.67932e-09	0.165604	6.06583e-12	6.79046e-13	0.141617	0.997934	10.1823	10.4728	11.7276	11.4734	10.1826	10.3179	11.8495	12.107	10.3263	10.4455	11.7545	11.3521
A_55_P2087840	14765	Gpr50	G-protein-coupled receptor 50	0.0742164	0.566576	1.28991	-0.0795846	0.729458	1.17986	-0.128254	0.643184	1.32373	-0.0107184	0.0432833	0.276804	2.29789e-07	1.56554e-12	0.244851	7.19745e-09	6.07847e-12	0.0695532	4.1608e-08	1.05414e-12	0.872843	0.520698	6.07658	6.1508	6.64316	7.36649	6.11986	5.99161	6.76305	7.4436	6.06586	5.98628	6.79532	7.24572
A_55_P2078633	12268	C4b	complement component 4B (Chido blood group)	-0.0819843	1.22048	1.28939	0.212933	2.06418	2.36042	0.0163468	1.3369	1.20503	-0.759054	-0.110527	0.517378	3.63379e-08	1.69764e-08	0.104922	1.78639e-11	2.34319e-12	0.896623	1.02261e-08	4.32857e-08	1.50552e-05	0.385373	9.49316	9.41118	10.7136	10.7826	9.38263	9.39898	10.7195	10.5877	8.73411	8.94704	10.7983	11.0945
A_55_P1975140	269275	Acvr1c	activin A receptor, type IC	0.0910615	0.98722	1.28907	0.149554	0.986693	0.954957	0.0605512	1.00263	0.828806	-0.0209603	0.12888	0.267918	1.34295e-09	2.61665e-11	0.0777882	1.35335e-09	2.16893e-09	0.456386	1.07297e-09	1.61708e-08	0.794964	0.123861	6.18967	6.28073	7.17689	7.47873	6.31855	6.3791	7.32118	7.14735	6.16871	6.31826	7.1554	7.12366
A_55_P1961730	240776	Kcnt2	potassium channel, subfamily T, member 2	0.0655686	0.588799	1.28858	-0.0796807	-0.375336	0.0812081	0.158415	0.829148	1.13658	0.345705	0.0139232	0.390448	6.60475e-07	9.76985e-12	0.299331	0.000120434	0.29048	0.048881	6.37303e-09	6.43251e-11	0.000269867	0.853653	6.87564	6.94121	7.46444	8.16423	6.88957	7.04798	7.71871	8.02615	7.22135	7.14167	6.84601	7.30256
A_52_P644690	14256	Flt3l	FMS-like tyrosine kinase 3 ligand	0.184073	1.53133	1.28677	0.336316	1.87784	1.62729	0.254128	1.50503	1.30541	-0.45177	-0.0695718	0.0814022	5.42547e-11	7.08052e-10	0.00369884	2.49862e-12	2.18262e-11	0.020694	7.0257e-11	5.7399e-10	0.000323238	0.492044	10.8339	11.018	12.3652	12.1207	10.7643	11.0184	12.2693	12.0697	10.3821	10.7184	12.26	12.0094
A_52_P303891	353187	Nr1d2	nuclear receptor subfamily 1, group D, member 2	0.0794516	0.473373	1.28668	-0.0534244	0.466545	0.869552	-0.0140984	0.592912	1.314	0.206055	0.33085	0.576659	0.00372907	8.89471e-08	0.7066	0.00413343	1.23284e-05	0.920702	0.000617511	6.69078e-08	0.158913	0.030598	10.0687	10.1481	10.5421	11.3554	10.3995	10.3854	10.9924	11.7135	10.2747	10.2213	10.7413	11.1443
A_52_P658122	23872	Ets2	E26 avian leukemia oncogene 2, 3' domain	0.177168	0.667248	1.28466	0.0888862	0.914677	1.14255	0.0978571	0.836824	1.11193	0.0719425	0.232619	0.0731318	2.12069e-06	2.63467e-10	0.350055	3.38356e-08	1.4582e-09	0.304991	1.13546e-07	2.15748e-09	0.447253	0.0228503	12.7651	12.9422	13.4323	14.0497	12.9977	13.0955	13.8345	14.1096	12.837	12.9259	13.7517	13.9795
A_55_P2072141	12212	Chic1	cysteine-rich hydrophobic domain 1	0.182303	1.27551	1.2839	0.106825	1.31577	1.05875	0.103903	1.10627	1.11609	-0.117875	0.0947451	0.0187162	4.28527e-12	3.87917e-12	0.144611	2.67184e-12	7.06978e-11	0.155182	3.66922e-11	3.21449e-11	0.109954	0.192545	8.48279	8.66509	9.75831	9.76669	8.57754	8.68144	9.68381	9.69362	8.36492	8.47174	9.68068	9.42367
A_55_P2063391	381229	Ccdc147	coiled-coil domain containing 147	0.0959666	0.398383	1.28348	-0.0175189	0.241305	1.44231	-0.171366	0.338297	0.99169	0.186936	0.169425	0.347508	0.0010074	7.57751e-10	0.861953	0.0271201	1.36428e-10	0.10326	0.00360022	2.96256e-08	0.0777638	0.106903	6.17949	6.27545	6.57787	7.46297	6.34891	6.17754	6.68721	7.3406	6.36642	6.3489	6.60773	7.80874
A_55_P2007630	233878	Sez6l2	seizure related 6 homolog like 2	0.0357112	0.379726	1.28308	0.0885943	0.277447	0.731086	-0.0484598	0.175439	1.18225	-0.0551943	0.0377147	0.664896	0.000249728	3.78438e-11	0.289867	0.00347865	1.18566e-07	0.557665	0.0456904	1.28123e-10	0.504963	0.647451	7.24995	7.28566	7.62967	8.53303	7.28766	7.2392	7.4631	8.46991	7.19475	7.28335	7.4722	7.92584
A_55_P2082653	245595	Zfp711	zinc finger protein 711	0.056485	0.508175	1.27886	0.0834152	0.83099	1.37266	-0.0972374	0.417362	0.69655	0.119608	0.233079	0.491404	1.02808e-05	3.47876e-11	0.313836	1.81829e-08	1.2e-11	0.24304	8.9281e-05	2.0076e-07	0.155437	0.0103709	6.19108	6.24756	6.69925	7.46994	6.42416	6.32692	6.84152	7.12071	6.31069	6.3941	7.14168	7.68334
A_55_P1955548	22350	Ezr	ezrin	0.260448	0.926191	1.2777	0.21003	0.72682	0.736661	0.165935	0.666221	1.58423	0.0721403	-0.250016	0.0132264	3.34413e-08	3.38754e-10	0.0390947	8.38592e-07	7.06145e-07	0.094798	2.49557e-06	1.37624e-11	0.45122	0.0166246	11.2777	11.5382	12.2039	12.5554	11.0277	11.1936	11.6939	12.6119	11.3499	11.5599	12.0767	12.0865
A_52_P212418	229780	Trmt13	tRNA methyltransferase 13	0.0811927	0.592289	1.27509	0.024501	0.332767	0.92728	0.121316	0.576829	0.932807	-0.124079	0.00563442	0.295087	6.93403e-07	1.32585e-11	0.748131	0.000421784	1.47654e-09	0.1254	9.71661e-07	1.35495e-09	0.117628	0.941042	10.7077	10.7889	11.3	11.9828	10.7133	10.8347	11.2902	11.6461	10.5836	10.6081	10.9164	11.5109
A_51_P507053	105727	Slc38a1	solute carrier family 38, member 1	0.17837	0.401223	1.2744	-0.144632	-0.2562	0.274494	0.199888	0.433818	0.954288	0.5157	0.242008	0.315315	0.0331863	1.56067e-06	0.412954	0.155997	0.130274	0.262411	0.0227565	4.55713e-05	0.00857964	0.178752	13.917	14.0954	14.3183	15.1914	14.159	14.3589	14.5929	15.1133	14.4327	14.2881	14.1765	14.7072
A_55_P2005549	329278	Tnn	tenascin N	-0.165873	0.489622	1.27335	-0.0159439	0.572617	1.24886	-0.0449466	1.02627	1.76321	0.222409	-0.126887	0.133717	0.000264353	1.94304e-09	0.881164	5.44411e-05	2.5688e-09	0.674208	4.05532e-08	1.59022e-11	0.0502088	0.244359	8.46055	8.29468	8.95018	9.7339	8.33367	8.28872	9.35994	10.0969	8.68296	8.66702	9.25558	9.93182
A_55_P2134246	20723	Serpinb9	serine (or cysteine) peptidase inhibitor, clade B, member 9	0.0461673	1.76357	1.27282	0.210908	2.19694	1.80273	0.196052	1.72492	1.16936	-0.00669873	0.0319872	0.684368	3.93438e-11	4.65119e-09	0.076947	1.41594e-12	2.83108e-11	0.0979606	5.47988e-11	1.53791e-08	0.952842	0.77791	8.88061	8.92678	10.6442	10.1534	8.9126	9.10865	10.6375	10.082	8.87392	9.08482	11.0709	10.6766
A_55_P2083489	63913	Fam129a	family with sequence similarity 129, member A	0.135404	0.86027	1.27109	0.00947347	0.657313	0.857258	0.111809	0.859337	1.25592	0.469124	0.0917475	0.0559144	6.35682e-10	1.84798e-12	0.887069	2.92664e-08	6.69061e-10	0.10803	6.45827e-10	2.21926e-12	2.43998e-06	0.181462	11.3205	11.4559	12.1808	12.5916	11.4123	11.5241	12.2716	12.6682	11.7896	11.7991	12.4469	12.6469
A_55_P1975947	74525	8430419L09Rik	RIKEN cDNA 8430419L09 gene	0.276082	1.35625	1.26978	0.112038	1.29625	1.04894	0.147808	1.66464	1.90424	0.102256	0.0414789	0.0137397	3.6619e-10	9.58367e-10	0.27767	7.09834e-10	1.4641e-08	0.157654	1.73704e-11	2.26492e-12	0.32028	0.682849	9.79806	10.0741	11.1543	11.0678	9.83954	9.98735	11.5042	11.7438	9.90032	10.0124	11.1966	10.9493
A_51_P404377	11858	Rnd2	Rho family GTPase 2	0.166319	0.818931	1.26973	0.0580598	0.182811	0.775117	0.179704	0.558108	1.82508	-0.312533	0.0289936	0.112112	3.75235e-07	8.53848e-10	0.565316	0.0831861	7.63419e-07	0.0880691	3.77709e-05	3.82701e-12	0.00610608	0.773135	8.44578	8.6121	9.26471	9.71551	8.47477	8.65448	9.03288	10.2999	8.13325	8.19131	8.31606	8.90836
A_55_P2069714	18412	Sqstm1	sequestosome 1	0.162207	0.34959	1.26952	0.121379	0.0807091	1.13366	0.124527	0.343011	1.78519	0.419277	0.00508603	0.104397	0.00191626	4.19846e-10	0.215876	0.404147	2.17319e-09	0.204773	0.00221964	2.55053e-12	0.000409085	0.9576	12.1824	12.3446	12.532	13.4519	12.1875	12.312	12.5305	13.9727	12.6017	12.7231	12.6824	13.7353
A_51_P259571	70726	Angptl6	angiopoietin-like 6	0.0970968	0.831081	1.26857	0.266659	0.235417	0.958586	0.0279779	0.352104	0.875984	0.297451	-0.0268938	0.247739	2.05624e-08	4.48856e-11	0.00460442	0.0103067	2.7368e-09	0.734046	0.000503882	9.8485e-09	0.00206823	0.743948	10.1079	10.205	10.939	11.3765	10.081	10.109	10.4331	10.957	10.4054	10.672	10.6408	11.3639
A_52_P267391	76681	Trim12a	tripartite motif-containing 12A	0.602595	1.41865	1.26714	0.789757	1.52593	1.45008	0.498774	1.59375	1.17034	-0.327932	0.0350956	7.88124e-07	3.98367e-12	2.19614e-11	2.11985e-08	1.31196e-12	2.85484e-12	8.02721e-06	6.74455e-13	7.21336e-11	0.000614893	0.654956	13.3522	13.9548	14.7708	14.6193	13.3873	13.886	14.981	14.5576	13.0242	13.814	14.5502	14.4743
A_55_P1958434	14718	Got1	glutamate oxaloacetate transaminase 1, soluble	0.250124	0.792105	1.26545	0.178422	0.528116	0.742379	0.262578	0.71309	1.28432	0.297657	-0.150951	0.00426485	1.41116e-08	1.51018e-11	0.0303944	2.95527e-06	3.47118e-08	0.00300894	6.0243e-08	1.20797e-11	0.00112689	0.0616396	13.1524	13.4025	13.9445	14.4178	13.0014	13.264	13.7145	14.2857	13.45	13.6284	13.9781	14.1924
A_52_P335609	75731	Idnk	idnK gluconokinase homolog (E. coli)	0.288174	1.633	1.26463	0.473303	1.84625	1.31097	0.176514	1.46404	0.996065	-0.380816	-0.0190262	0.000786548	9.79858e-14	4.91757e-12	4.50325e-06	1.46421e-14	2.84598e-12	0.0221987	5.26345e-13	1.76213e-10	5.32495e-05	0.788249	12.0808	12.3689	13.7137	13.3454	12.0617	12.2382	13.5258	13.0578	11.6999	12.1732	13.5462	13.0109
A_51_P196925	20312	Cx3cl1	chemokine (C-X3-C motif) ligand 1	0.00427311	0.665994	1.26387	-0.0260392	0.334347	0.802147	0.185222	1.35367	1.65171	-0.134023	-0.0964483	0.946433	1.25976e-08	9.7663e-13	0.683023	6.82454e-05	8.82398e-10	0.00930923	3.40851e-13	1.57432e-14	0.0481728	0.143116	13.9174	13.9217	14.5834	15.1813	13.821	14.0062	15.1747	15.4727	13.7834	13.7574	14.1178	14.5856
A_51_P443508	67895	Ppa1	pyrophosphatase (inorganic) 1	0.112349	1.16143	1.26268	0.0689966	0.883762	0.875877	0.224754	1.2778	1.25722	0.329834	-0.253341	0.0838692	2.33636e-12	6.5129e-13	0.27415	1.42281e-10	1.62466e-10	0.00200977	5.42621e-13	6.95986e-13	5.89961e-05	0.000751632	14.3037	14.4161	15.4652	15.5664	14.0504	14.2752	15.3282	15.3076	14.6336	14.7026	15.5173	15.5095
A_55_P1974687	211147	March11	membrane-associated ring finger (C3HC4) 11	-0.0358218	0.486143	1.26245	-0.0281609	0.0363383	0.689117	-0.0821643	0.307156	1.35004	0.474049	-0.242846	0.699027	6.79126e-05	2.75063e-10	0.760954	0.694924	1.18246e-06	0.379993	0.00388991	1.01999e-10	8.82787e-05	0.0168915	7.24344	7.20762	7.72958	8.50589	7.00059	6.91843	7.30775	8.35063	7.71749	7.68933	7.75383	8.4066
A_51_P351481	56706	Ccnl1	cyclin L1	0.124307	0.858683	1.26218	-0.10489	0.621814	0.953568	0.318424	1.53944	1.17435	-0.199624	0.12878	0.199679	8.72092e-08	3.74123e-10	0.27559	5.38942e-06	2.07198e-08	0.00348646	1.95263e-11	1.0719e-09	0.0474151	0.1848	11.0324	11.1567	11.8911	12.2946	11.1612	11.4796	12.7006	12.3355	10.8328	10.7279	11.4546	11.7863
A_55_P1986306	353258	Ltv1	LTV1 homolog (S. cerevisiae)	0.00558037	0.723366	1.26213	0.0767189	0.291065	0.846516	0.0739403	0.930387	1.47419	0.0609478	-0.279852	0.949929	3.83044e-07	1.54441e-10	0.393536	0.00430676	4.67716e-08	0.410508	1.26299e-08	1.51703e-11	0.496029	0.00563522	12.9813	12.9868	13.7046	14.2434	12.7014	12.7754	13.6318	14.1756	13.0422	13.1189	13.3333	13.8887
A_51_P195958	21664	Phlda1	pleckstrin homology-like domain, family A, member 1	0.0778128	1.14695	1.26169	-0.0980514	1.02595	0.849476	0.317422	1.7194	1.43497	-0.322539	-0.220516	0.193952	1.13285e-12	2.62449e-13	0.106894	6.18397e-12	1.0514e-10	4.6855e-05	2.16255e-15	3.59811e-14	3.94278e-05	0.00145358	15.4812	15.559	16.6282	16.7429	15.2607	15.5781	16.9801	16.6957	15.1587	15.0606	16.1846	16.0081
A_55_P2124941	56710	Brinp1	bone morphogenic protein/retinoic acid inducible neural specific 1	0.094391	1.59337	1.26137	0.163291	1.51732	0.951355	0.152152	1.66863	1.95475	-0.300248	-0.474559	0.351874	2.77265e-11	8.78309e-10	0.116697	5.76407e-11	4.74688e-08	0.141801	1.38475e-11	1.25227e-12	0.00768347	0.000192151	10.3505	10.4449	11.9439	11.6119	9.87596	10.0281	11.5446	11.8307	10.0503	10.2136	11.5676	11.0016
A_51_P244824	26377	Dapp1	dual adaptor for phosphotyrosine and 3-phosphoinositides 1	0.275694	1.2984	1.26101	0.26907	1.36364	1.12279	0.328787	1.47625	1.10839	-0.0321039	0.0333946	0.00206804	1.01012e-11	1.56978e-11	0.00249045	4.80807e-12	8.9261e-11	0.000471058	1.43657e-12	1.08145e-10	0.674335	0.662113	9.55157	9.82727	10.85	10.8126	9.58497	9.91376	11.0612	10.6934	9.51947	9.78854	10.8831	10.6423
A_55_P1965278	70887	Dmrtc1a	DMRT-like family C1a	0.0467119	0.813481	1.26021	-0.0545809	1.10059	1.02668	-0.0544848	0.799442	0.767744	0.0294767	0.140282	0.649927	5.37842e-07	1.29278e-09	0.596333	8.95753e-09	2.36776e-08	0.596974	6.7297e-07	1.1265e-06	0.77413	0.183944	6.17999	6.2267	6.99347	7.4402	6.32027	6.26579	7.11971	7.08802	6.20947	6.15488	7.31006	7.23615
A_55_P2092526	21815	Tgif1	TGFB-induced factor homeobox 1	0.283088	0.739378	1.25974	0.00354844	0.517061	0.731039	0.329823	0.92391	1.21594	0.128148	0.0148331	0.00285409	9.27876e-08	4.48986e-11	0.965326	8.59554e-06	1.0811e-07	0.000841895	4.19538e-09	7.61316e-11	0.130467	0.855876	14.802	15.0851	15.5414	16.0618	14.8169	15.1467	15.7408	16.0328	14.9302	14.9337	15.4473	15.6612
A_51_P156927	238247	Arid4a	AT rich interactive domain 4A (RBP1-like)	0.402841	1.46166	1.25853	0.0697611	1.4494	1.04587	0.234419	1.83332	0.971792	-0.0487325	0.190644	0.00037682	2.50577e-11	2.32455e-10	0.44803	2.84335e-11	3.42375e-09	0.0188863	8.05e-13	9.70931e-09	0.594364	0.0495566	10.4062	10.809	11.8679	11.6647	10.5968	10.8313	12.4302	11.5686	10.3575	10.4272	11.8069	11.4033
A_52_P105509	54447	Asah2	N-acylsphingosine amidohydrolase 2	0.0358705	1.27484	1.25837	-0.00757138	1.34744	1.54191	-0.131337	1.04582	1.04044	-0.372312	-0.0125685	0.605315	3.04565e-12	3.71174e-12	0.912783	1.30912e-12	1.65323e-13	0.0716235	6.02714e-11	6.50949e-11	5.27385e-05	0.855774	8.77836	8.81423	10.0532	10.0367	8.76579	8.63445	9.81161	9.80623	8.40605	8.39847	9.75348	9.94795
A_52_P462657	217122	Gm11545	predicted gene 11545	0.0416883	1.17462	1.25752	0.178888	1.21254	1.0324	0.211396	1.09452	0.650661	-0.122477	-0.144514	0.684184	3.37957e-09	1.26653e-09	0.0945933	2.14256e-09	2.08689e-08	0.0519877	9.21191e-09	8.11707e-06	0.241309	0.170354	6.30671	6.3484	7.48133	7.56423	6.1622	6.37359	7.25671	6.81286	6.18423	6.36312	7.39678	7.21663
A_55_P2004370	12353	Car6	carbonic anhydrase 6	0.187445	0.722336	1.2567	0.174375	-0.001434	0.583742	0.241948	0.511447	1.38135	1.69531	-0.0840591	0.0117019	8.12199e-09	2.28602e-12	0.0175794	0.982888	1.52027e-07	0.00206819	8.53861e-07	5.38389e-13	2.28323e-14	0.219897	7.27958	7.46702	8.00191	8.53628	7.19552	7.43747	7.70696	8.57687	8.97489	9.14926	8.97345	9.55863
A_52_P91274	69388	1700018G05Rik	RIKEN cDNA 1700018G05 gene	0.16813	1.03017	1.25387	0.110575	0.99775	1.03197	0.00580496	1.06309	0.96833	0.127589	0.253012	0.0543877	9.72502e-10	5.36887e-11	0.190944	1.54535e-09	9.48079e-10	0.94372	6.15064e-10	2.37838e-09	0.13467	0.00656994	6.16372	6.33185	7.19389	7.41759	6.41673	6.42254	7.47982	7.38506	6.29131	6.40188	7.28906	7.32328
A_55_P1959833	244886	AI118078	expressed sequence AI118078	0.169912	0.738184	1.2532	-0.22919	0.683425	0.787736	0.181211	1.33498	1.67506	0.162794	0.0569713	0.246902	8.60473e-05	1.52554e-07	0.124572	0.000186941	4.3314e-05	0.21819	6.5083e-08	2.72014e-09	0.266426	0.692242	9.69551	9.86542	10.4337	10.9487	9.75248	9.93369	11.0875	11.4275	9.8583	9.62911	10.5417	10.646
A_51_P233160	70082	Lysmd2	LysM, putative peptidoglycan-binding, domain containing 2	0.115721	1.09968	1.2514	0.0777387	0.933289	0.507832	0.160673	0.838373	1.19056	0.290824	0.00775464	0.472446	3.17438e-06	6.28403e-07	0.627759	2.16696e-05	0.00528387	0.322129	6.9364e-05	1.18553e-06	0.0830634	0.961277	11.8573	11.973	12.957	13.1087	11.8651	12.0257	12.7034	13.0556	12.1481	12.2259	13.0814	12.656
A_55_P1974288	19697	Rela	v-rel reticuloendotheliosis viral oncogene homolog A (avian)	0.103297	0.755392	1.25098	0.0892723	0.46016	0.683774	0.046052	0.642379	1.4123	-0.00213357	-0.039168	0.0732817	2.34515e-10	1.13063e-13	0.117023	2.49478e-07	1.00749e-09	0.405209	2.4824e-09	1.72941e-14	0.968892	0.477637	15.0693	15.1726	15.8247	16.3203	15.0301	15.0762	15.6725	16.4424	15.0672	15.1564	15.5273	15.7509
A_55_P2109827	21353	Tank	TRAF family member-associated Nf-kappa B activator	0.273649	0.642104	1.25091	-0.112786	0.563097	0.847484	0.217482	0.835593	1.33039	0.139894	0.197896	0.137961	0.00211472	2.4616e-06	0.528852	0.0054574	0.000186031	0.232436	0.000213484	1.14203e-06	0.436293	0.275368	9.51748	9.79113	10.1596	10.7684	9.71537	9.93286	10.551	11.0458	9.65737	9.54459	10.2205	10.5049
A_51_P124719	70829	Ccdc93	coiled-coil domain containing 93	-0.0208254	0.565077	1.25064	0.0212379	0.2502	0.800768	0.0235575	0.657086	1.23726	-0.0337348	-0.0755247	0.71495	2.63749e-08	2.07977e-13	0.709581	0.000397096	1.76963e-10	0.679694	3.15048e-09	2.45431e-13	0.555487	0.196465	10.2182	10.1974	10.7833	11.4688	10.1427	10.1662	10.7998	11.3799	10.1845	10.2057	10.4347	10.9852
A_52_P235347	56636	Fgf21	fibroblast growth factor 21	0.0522833	0.325136	1.24996	-0.0898907	-0.14531	0.732302	-0.0178996	0.172539	0.75631	0.333683	-0.013246	0.62682	0.00718146	2.71571e-09	0.406644	0.187327	3.46334e-06	0.867354	0.121474	2.33368e-06	0.00606267	0.901614	6.41741	6.4697	6.74255	7.66738	6.40417	6.38627	6.57671	7.16048	6.7511	6.66121	6.60579	7.4834
A_51_P195506	12977	Csf1	colony stimulating factor 1 (macrophage)	0.107341	0.85468	1.24891	0.159391	0.98898	1.22312	0.178201	1.11506	1.31994	-0.336675	0.00106603	0.0738649	6.86674e-11	2.17031e-13	0.0118551	7.66486e-12	2.99203e-13	0.00590273	1.23551e-12	9.24834e-14	1.91211e-05	0.985073	16.0689	16.1762	16.9236	17.3178	16.07	16.2482	17.185	17.3899	15.7322	15.8916	16.7212	16.9553
A_55_P2326091	442821	9330175M20Rik	RIKEN cDNA 9330175M20 gene	0.0521117	0.670951	1.24855	-0.00123454	0.409085	0.712835	0.0890251	0.759806	1.6411	0.158974	-0.00411509	0.48112	8.17022e-08	1.03527e-11	0.986576	3.64262e-05	3.57498e-08	0.23571	1.47495e-08	1.59099e-13	0.0429055	0.955279	10.2809	10.333	10.9518	11.5294	10.2768	10.3658	11.0366	11.9179	10.4398	10.4386	10.8489	11.1527
A_55_P2325663	545975	Cers3	ceramide synthase 3	0.0388284	0.374536	1.24849	0.143321	0.153855	0.78133	0.0919718	0.273785	1.12608	0.201512	-0.0472602	0.650532	0.000407957	1.01136e-10	0.107819	0.086164	8.14122e-08	0.290408	0.00500619	4.63516e-10	0.0292477	0.58196	6.92005	6.95887	7.29458	8.16853	6.87279	6.96476	7.14657	7.99886	7.12156	7.26488	7.27541	7.90289
A_52_P295533	246696	Slc25a28	solute carrier family 25, member 28	0.398127	1.84231	1.24714	0.472922	1.70816	1.11403	0.488581	1.95014	1.14866	0.124927	-0.215063	0.000231529	2.82335e-13	1.04103e-10	3.96897e-05	9.00733e-13	5.49436e-10	2.77824e-05	1.17544e-13	3.5082e-10	0.157317	0.0212781	11.9373	12.3354	13.7796	13.1844	11.7222	12.2108	13.6724	12.8709	12.0622	12.5351	13.7704	13.1763
A_52_P241508	72147	Zbtb46	zinc finger and BTB domain containing 46	-0.0624148	0.799188	1.24694	0.069468	0.553735	1.02288	-0.0307225	1.98689	2.13866	-0.107785	0.0261209	0.542395	6.15877e-07	1.3573e-09	0.498358	4.77484e-05	2.25546e-08	0.763238	1.29507e-12	4.1933e-13	0.298377	0.797783	7.30791	7.24549	8.1071	8.55485	7.33403	7.30331	9.32092	9.47269	7.20012	7.26959	7.75386	8.223
A_51_P254471	11797	Birc2	baculoviral IAP repeat-containing 2	0.0898128	0.983634	1.24547	0.0507982	0.755928	0.792775	0.154826	0.895077	0.894743	-0.0212235	0.0678755	0.397192	5.77041e-08	2.10261e-09	0.629347	1.80146e-06	9.90766e-07	0.153246	2.05168e-07	2.06185e-07	0.839699	0.520215	11.1476	11.2374	12.1312	12.393	11.2154	11.3703	12.1105	12.1102	11.1263	11.1771	11.8823	11.9191
A_51_P162676	276905	Armc7	armadillo repeat containing 7	0.282937	0.83886	1.24509	0.16928	0.71458	1.09692	0.244801	0.405995	0.992837	-0.233175	0.0118417	0.000733122	1.47541e-09	4.16818e-12	0.0239928	1.44499e-08	2.82366e-11	0.0023828	1.97523e-05	1.24949e-10	0.00341745	0.863621	9.73806	10.021	10.5769	10.9832	9.74991	9.99471	10.1559	10.7427	9.50489	9.67417	10.2195	10.6018
A_55_P2020326	17123	Madcam1	mucosal vascular addressin cell adhesion molecule 1	-0.0446212	0.545615	1.244	0.103536	0.000966311	0.439794	0.0454914	0.149568	0.948933	0.951683	0.13238	0.539828	1.02207e-06	8.82486e-12	0.165461	0.989342	1.38367e-05	0.532049	0.0520494	4.97988e-10	4.77335e-10	0.0816821	7.14984	7.10522	7.69545	8.39384	7.28222	7.32771	7.43179	8.23115	8.10152	8.20506	8.10249	8.54132
A_51_P432199	60406	Sap30	sin3 associated polypeptide	0.323845	1.39734	1.24333	0.371839	1.20781	0.732249	0.0611682	1.2901	2.24833	0.188472	0.0598022	0.00305993	8.18793e-11	4.59291e-10	0.0010322	7.01545e-10	7.0161e-07	0.519211	2.67063e-10	5.89063e-14	0.0593425	0.528464	9.2072	9.53105	10.6045	10.4505	9.267	9.32817	10.5571	11.5153	9.39567	9.76751	10.6035	10.1279
A_55_P2074942	15567	Slc6a4	solute carrier family 6 (neurotransmitter transporter, serotonin), member 4	-0.0409337	0.601235	1.24303	-0.0181433	0.637202	1.1159	-0.21753	0.385793	1.18992	-0.14458	0.0936763	0.735143	0.000119769	1.6062e-08	0.880633	6.57687e-05	7.09834e-08	0.0861582	0.00512166	2.94551e-08	0.241739	0.442356	6.38759	6.34666	6.98883	7.63062	6.48127	6.26374	6.86706	7.67119	6.24301	6.22487	6.88021	7.35891
A_52_P63343	229599	Ciart	circadian associated repressor of transcription	-0.0257406	0.249891	1.24299	-0.132989	-0.13624	0.994313	-0.0292197	0.141007	1.55591	0.0749474	-0.000368551	0.900518	0.235483	1.49639e-05	0.52106	0.511059	0.000161994	0.887165	0.496603	9.95341e-07	0.716387	0.998572	7.10322	7.07748	7.35311	8.34621	7.10285	7.07363	7.24386	8.65877	7.17817	7.04518	7.04193	8.17248
A_55_P2066116	12051	Bcl3	B cell leukemia/lymphoma 3	0.0286237	0.451451	1.24034	0.0768943	0.209626	0.884768	0.171731	0.652608	1.18698	0.12217	0.188738	0.664285	3.28459e-06	2.16466e-12	0.252306	0.00518882	3.42706e-10	0.0174468	2.65914e-08	4.22642e-12	0.0775236	0.0101696	13.0569	13.0855	13.5084	14.2973	13.2457	13.4174	13.8983	14.4326	13.1791	13.256	13.3887	14.0639
A_52_P344424	16891	Lipg	lipase, endothelial	0.240083	0.931273	1.23689	-0.0147201	1.07639	0.972285	0.065896	0.846363	2.45674	-0.305949	-0.343546	0.302728	0.000795718	5.11841e-05	0.948743	0.00021114	0.000545022	0.773794	0.00175208	8.95176e-09	0.193641	0.147134	6.67611	6.91619	7.60738	7.913	6.33256	6.39846	7.17892	8.78931	6.37016	6.35544	7.44655	7.34244
A_51_P501844	232174	Cyp26b1	cytochrome P450, family 26, subfamily b, polypeptide 1	-0.170994	0.229555	1.23683	-0.375093	0.343339	1.32815	-0.170858	0.153465	0.674202	-0.802837	0.468904	0.23088	0.114007	1.22872e-07	0.0148245	0.023702	4.67865e-08	0.231235	0.280128	0.000160111	2.55225e-05	0.00357161	11.4689	11.2979	11.6985	12.7057	11.9378	11.767	12.0913	12.612	10.6661	10.291	11.0094	11.9942
A_55_P1988754	320332	Hist4h4	histone cluster 4, H4	0.472001	1.15669	1.23649	-0.0586704	0.171922	-0.179539	0.0725917	0.939076	1.37287	0.550061	0.198293	0.000854099	2.81085e-08	1.10917e-08	0.617496	0.155152	0.138776	0.537505	4.60734e-07	2.50887e-09	0.000211172	0.104582	11.6761	12.1481	12.8328	12.9126	11.8744	11.947	12.8134	13.2472	12.2261	12.1675	12.3981	12.0466
A_55_P2140002	106869	Tnfaip8	tumor necrosis factor, alpha-induced protein 8	0.300474	1.08869	1.23501	0.0936291	0.736414	1.03138	0.301478	1.40691	1.26847	0.118874	0.110657	0.00813447	8.33809e-09	1.37463e-09	0.360238	1.55618e-06	1.78013e-08	0.00796526	2.04563e-10	9.33037e-10	0.249194	0.28208	10.9346	11.235	12.0232	12.1696	11.0452	11.3467	12.4521	12.3137	11.0534	11.1471	11.7898	12.0848
A_55_P2048493	71004	4931440P22Rik	RIKEN cDNA 4931440P22 gene	0.128856	0.666014	1.23444	-0.0436247	0.401621	0.755784	0.284771	0.874715	1.32505	-0.245967	0.0311097	0.134276	4.58173e-07	7.72609e-11	0.600562	0.000158135	8.5735e-08	0.00307631	1.14273e-08	2.67949e-11	0.00832688	0.708258	7.90148	8.03033	8.56749	9.13592	7.93259	8.21736	8.8073	9.25764	7.65551	7.61189	8.05713	8.41129
A_65_P19395	14964	H2-D1	histocompatibility 2, D region locus 1	-0.0121678	0.744722	1.23337	0.19574	1.46377	1.99567	0.068668	0.957734	1.05963	-0.668127	-0.034831	0.867031	1.69538e-08	1.06951e-11	0.0146931	7.8984e-13	6.57165e-15	0.351306	4.62202e-10	1.0402e-10	7.54668e-08	0.632844	15.4259	15.4137	16.1706	16.6592	15.391	15.4597	16.3488	16.4507	14.7577	14.9535	16.2215	16.7534
A_55_P2414924	66978	Luc7l	Luc7 homolog (S. cerevisiae)-like	0.183264	0.8621	1.23301	0.0695409	0.370189	0.647551	0.228856	0.624252	1.45822	0.215338	-0.0847137	0.138468	1.7562e-06	1.52069e-08	0.562204	0.00623121	4.8796e-05	0.0693113	7.19222e-05	1.39749e-09	0.0856216	0.481314	10.5131	10.6964	11.3752	11.7461	10.4284	10.6573	11.0527	11.8866	10.7285	10.798	11.0987	11.376
A_51_P143232	319481	Wdr59	WD repeat domain 59	0.0342935	0.861115	1.2314	0.165183	0.545944	0.848449	0.0508648	0.633461	1.42159	0.0183356	-0.0438682	0.800698	8.42538e-06	9.06404e-08	0.234256	0.000874162	1.00162e-05	0.708428	0.000226142	1.25412e-08	0.892554	0.746911	9.86846	9.90275	10.7296	11.0999	9.82459	9.87545	10.4581	11.2462	9.88679	10.052	10.4327	10.7352
A_52_P438036	78134	Lpar4	lysophosphatidic acid receptor 4	-0.05091	0.976408	1.23094	0.017765	0.800646	1.09207	-0.0501067	1.04918	0.920262	-0.710537	-0.0224663	0.425531	4.45455e-11	1.33952e-12	0.779026	8.3422e-10	8.26808e-12	0.432724	1.51399e-11	1.07664e-10	4.65439e-09	0.72291	12.6144	12.5635	13.5909	13.8454	12.592	12.5419	13.6412	13.5122	11.9039	11.9217	12.7046	12.996
A_52_P368057	26570	Slc7a11	solute carrier family 7 (cationic amino acid transporter, y+ system), member 11	0.673119	0.754658	1.2302	0.295709	0.0646067	0.236869	0.96085	1.08619	1.83684	1.24175	0.498075	7.50011e-05	2.17618e-05	4.70641e-08	0.0336649	0.618436	0.0811564	1.22028e-06	2.50941e-07	1.52196e-10	4.14062e-08	0.00124881	7.52556	8.19868	8.28022	8.75576	8.02364	8.98449	9.10983	9.86048	8.76731	9.06302	8.83192	9.00418
A_52_P445387	12750	Clk4	CDC like kinase 4	0.181818	0.643241	1.22987	-0.0384398	0.261027	0.874076	-0.00429576	0.75293	1.1673	-0.107861	0.23708	0.0931767	1.06154e-05	2.06215e-09	0.710689	0.0208863	2.33524e-07	0.966862	1.59071e-06	4.3564e-09	0.305151	0.033398	11.6929	11.8747	12.3361	12.9227	11.9299	11.9256	12.6829	13.0972	11.585	11.5466	11.846	12.4591
A_55_P2086075	100039133	Gm2058	ubiquitin-conjugating enzyme E2H pseudogene	-0.0385417	0.576788	1.22617	-0.159556	0.382064	0.879127	-0.078854	0.797085	1.60535	-0.247555	-0.0893065	0.640476	2.5303e-06	7.50643e-11	0.0664217	0.000236571	9.42571e-09	0.344617	3.68734e-08	1.28304e-12	0.00756901	0.286376	9.35334	9.3148	9.93013	10.5795	9.26403	9.18518	10.0611	10.8694	9.10578	8.94623	9.48785	9.98491
A_51_P148744	403174	Msantd1	Myb/SANT-like DNA-binding domain containing 1	0.0522859	0.543576	1.22523	0.0688879	0.583708	0.785709	-0.0029953	0.712218	1.0132	-0.145684	0.00160368	0.613098	6.5393e-05	2.05226e-09	0.506556	3.03727e-05	8.82336e-07	0.976795	3.00421e-06	2.9992e-08	0.170091	0.987575	8.93426	8.98655	9.47784	10.1595	8.93586	8.93287	9.64808	9.94907	8.78858	8.85746	9.37228	9.57429
A_55_P2156288	100042616	Gm3932	predicted gene 3932	0.20754	1.43187	1.22381	0.239957	2.00548	1.61039	0.146481	1.03273	1.37233	-0.26212	0.104035	0.163598	2.67583e-08	2.24254e-07	0.110785	2.13636e-10	5.14622e-09	0.317997	1.97776e-06	4.80037e-08	0.0837994	0.474692	9.64996	9.8575	11.0818	10.8738	9.754	9.90048	10.7867	11.1263	9.38784	9.6278	11.3933	10.9982
A_55_P2121195	209707	Lcorl	ligand dependent nuclear receptor corepressor-like	0.231308	0.638508	1.22287	0.0465893	0.32886	0.495535	-0.068709	0.445934	0.685483	0.283797	0.184146	0.00987342	5.10472e-07	5.36883e-11	0.563362	0.000740884	1.14672e-05	0.397044	3.74466e-05	2.01439e-07	0.00245261	0.0331618	8.14989	8.3812	8.7884	9.37276	8.33404	8.26533	8.77997	9.01952	8.43369	8.48028	8.76255	8.92922
A_51_P215438	19125	Prodh	proline dehydrogenase	0.200361	0.647658	1.22216	0.244427	0.273799	0.597663	0.21207	0.569832	1.32236	0.453912	-0.272722	0.0348429	1.43244e-06	2.226e-10	0.0125229	0.00620238	3.85406e-06	0.0266793	6.8181e-06	6.91938e-11	8.52415e-05	0.00636544	8.58656	8.78692	9.23422	9.80872	8.31384	8.52591	8.88367	9.6362	9.04047	9.2849	9.31427	9.63814
A_52_P559919	19106	Eif2ak2	eukaryotic translation initiation factor 2-alpha kinase 2	0.509873	1.60348	1.22118	0.766981	1.94544	1.43093	0.429904	1.66376	0.626598	-0.235902	-0.0221032	3.45302e-05	6.1093e-12	3.57131e-10	2.43101e-07	3.19149e-13	3.39806e-11	0.000201492	3.48929e-12	3.17518e-06	0.0181714	0.808284	12.9171	13.427	14.5206	14.1383	12.895	13.3249	14.5587	13.5216	12.6812	13.4482	14.6266	14.1121
A_55_P1983733	107747	Aldh1l1	aldehyde dehydrogenase 1 family, member L1	-0.0129555	1.08078	1.21841	0.033519	1.20472	1.81261	0.0644053	0.954668	1.27679	-0.356171	-0.190712	0.873338	4.04655e-10	6.87624e-11	0.680708	8.13634e-11	1.64889e-13	0.43248	2.45124e-09	3.41662e-11	0.000407803	0.0299158	8.55198	8.53902	9.63276	9.77038	8.36127	8.42567	9.31593	9.63805	8.19581	8.22933	9.40052	10.0084
A_51_P142153	78749	Filip1l	filamin A interacting protein 1-like	0.0424944	0.908751	1.21786	-0.105485	0.868629	0.756815	0.11072	0.932327	0.964108	-0.187724	-0.114631	0.722173	8.98524e-07	1.7934e-08	0.382379	1.58772e-06	8.42704e-06	0.359804	6.47607e-07	4.19877e-07	0.129566	0.343547	15.6474	15.6899	16.5561	16.8653	15.5328	15.6435	16.4651	16.4969	15.4597	15.3542	16.3283	16.2165
A_51_P126437	13803	Enc1	ectodermal-neural cortex 1	0.34178	1.27857	1.21772	0.103882	1.32568	0.967545	0.162836	1.54177	1.39925	-0.162064	0.0776012	0.00016093	4.12711e-12	8.6421e-12	0.155228	2.38004e-12	2.68189e-10	0.032744	2.35583e-13	1.04358e-12	0.0334677	0.281539	13.1205	13.4623	14.3991	14.3383	13.1981	13.361	14.7399	14.5974	12.9585	13.0624	14.2842	13.926
A_55_P2007423	17931	Ppp1r12a	protein phosphatase 1, regulatory (inhibitor) subunit 12A	0.133999	0.926427	1.21624	-0.181596	0.87157	0.821893	-0.0331591	1.09106	1.3806	0.214196	0.159873	0.311367	2.11491e-06	6.09795e-08	0.175779	4.4541e-06	8.93391e-06	0.79914	2.61373e-07	1.05445e-08	0.114219	0.230272	9.71514	9.84914	10.6416	10.9314	9.87501	9.84185	10.9661	11.2556	9.92934	9.74774	10.8009	10.7512
A_55_P2117903	170460	Stard5	StAR-related lipid transfer (START) domain containing 5	0.295944	1.74884	1.21607	0.407316	1.55514	1.02357	0.367068	1.46273	1.3003	0.584529	-0.0532678	0.0334916	3.12494e-10	5.48617e-08	0.0055825	1.72787e-09	5.423e-07	0.0107936	4.16036e-09	2.18189e-08	0.000303569	0.680841	8.57395	8.86989	10.3228	9.79002	8.52068	8.88775	9.98341	9.82098	9.15848	9.56579	10.7136	10.182
A_51_P219444	224860	Plcl2	phospholipase C-like 2	0.101549	1.25607	1.21593	0.243449	1.345	1.36861	0.016018	0.911874	1.32291	0.278966	-0.16261	0.390376	8.69028e-09	1.37162e-08	0.0504152	3.28872e-09	2.5629e-09	0.890969	6.5936e-07	4.16622e-09	0.0275773	0.176662	9.63913	9.74068	10.8952	10.8551	9.47652	9.49254	10.3884	10.7994	9.9181	10.1615	11.2631	11.2867
A_55_P2180944	77056	Tmco4	transmembrane and coiled-coil domains 4	0.161217	1.02067	1.21468	0.201053	1.03873	1.20555	0.150069	1.1254	1.30686	-0.0721707	-0.0497049	0.0588931	8.13532e-10	6.25336e-11	0.0220279	6.30035e-10	6.99742e-11	0.0765406	1.94197e-10	2.09103e-11	0.375884	0.539272	11.3001	11.4613	12.3207	12.5148	11.2504	11.4004	12.3758	12.5572	11.2279	11.429	12.2666	12.4335
A_51_P344376	14788	Gpr162	G protein-coupled receptor 162	-0.0694219	0.158867	1.21093	0.120984	-0.151654	0.776521	0.0344738	0.0223939	1.17524	-0.314581	-0.218939	0.461774	0.103779	6.0083e-10	0.207407	0.1191	2.95116e-07	0.712971	0.810898	9.29026e-10	0.00356377	0.0302975	8.08202	8.0126	8.24089	9.29295	7.86308	7.89756	7.88548	9.03832	7.76744	7.88842	7.61579	8.54396
A_55_P2044413	56066	Cxcl11	chemokine (C-X-C motif) ligand 11	0.287886	0.795293	1.20998	0.0700727	0.447668	0.605877	0.24078	1.51171	1.36577	-0.180914	0.253126	0.0255899	4.42522e-06	1.84021e-08	0.557233	0.00149499	9.29222e-05	0.0561616	7.684e-10	3.32719e-09	0.141322	0.0458999	11.2555	11.5434	12.0508	12.4654	11.5086	11.7494	13.0203	12.8744	11.0746	11.1446	11.5222	11.6804
A_51_P388847	106766	Stap2	signal transducing adaptor family member 2	-0.0856281	0.598009	1.20777	-0.0368425	0.133139	0.879072	-0.0389343	0.648852	1.08305	0.0961457	0.000673252	0.273226	6.62662e-07	3.28372e-11	0.631979	0.0968406	3.47121e-09	0.612914	2.28844e-07	1.66475e-10	0.220863	0.992991	8.26281	8.17718	8.86082	9.47059	8.26349	8.22455	8.91234	9.34653	8.35896	8.32212	8.4921	9.23803
A_55_P2014882	241452	Dhrs9	dehydrogenase/reductase (SDR family) member 9	0.0226375	0.749111	1.2076	-0.0528287	0.522768	0.740815	-0.0205837	1.09568	0.937693	0.210037	0.242572	0.832647	2.60432e-06	4.4047e-09	0.623034	0.000145278	2.98489e-06	0.847616	1.73565e-08	1.45655e-07	0.0637398	0.0352433	6.42056	6.4432	7.16967	7.62816	6.66313	6.64255	7.75881	7.60083	6.6306	6.57777	7.15337	7.37141
A_55_P2095583	21461	Tcp10a	t-complex protein 10a	0.154992	0.681358	1.20681	0.21705	0.559133	1.61463	0.0303999	0.622708	1.43862	0.088355	0.10413	0.227142	4.77625e-05	4.03169e-08	0.0977586	0.000346969	6.47081e-10	0.808503	0.000121961	3.42923e-09	0.484247	0.411144	6.80518	6.96017	7.48653	8.01198	6.90931	6.93971	7.53201	8.34793	6.89353	7.11058	7.45266	8.50816
A_55_P2043982	17772	Mtm1	X-linked myotubular myopathy gene 1	0.517389	0.480705	1.20445	0.149853	0.90571	0.764443	0.444413	1.33245	2.0605	-0.270111	0.715357	0.0190712	0.027661	1.67108e-05	0.460857	0.000322714	0.00141924	0.0396658	5.14662e-06	1.74796e-08	0.192136	0.00238832	8.94641	9.4638	9.42711	10.1509	9.66176	10.1062	10.9942	11.7223	8.6763	8.82615	9.58201	9.44074
A_55_P2121794	381373	Sp9	trans-acting transcription factor 9	0.0687396	0.611696	1.20322	0.0854577	0.378915	0.684672	0.151218	0.174348	0.813615	-0.0761395	0.00802672	0.669643	0.0013818	1.11627e-06	0.596421	0.0292605	0.000527455	0.353291	0.286681	0.000100491	0.636747	0.960151	6.39609	6.46483	7.00778	7.59931	6.40412	6.55533	6.57846	7.21773	6.31995	6.40541	6.69886	7.00462
A_55_P2088905	15444	Hpca	hippocalcin	0.325643	1.53764	1.20251	0.268991	1.36893	1.00011	0.0647732	1.87432	2.05968	0.181056	0.44194	0.0298355	5.5977e-09	1.65831e-07	0.0664078	2.85342e-08	1.78605e-06	0.641496	3.19518e-10	7.91639e-11	0.203361	0.00519076	8.41202	8.73766	9.94966	9.61453	8.85396	8.91873	10.7283	10.9136	8.59308	8.86207	9.96201	9.59319
A_66_P115539	667768	Gm11240	predicted gene 11240	0.0613279	0.693754	1.2023	-0.0938928	0.579183	0.809227	-0.0127259	0.809047	1.72592	0.0797215	-0.0710696	0.520838	1.51096e-06	8.25012e-10	0.329851	1.32069e-05	2.07641e-07	0.893336	2.08257e-07	3.76543e-12	0.406057	0.457867	10.9912	11.0525	11.685	12.1935	10.9201	10.9074	11.7292	12.6461	11.0709	10.977	11.6501	11.8802
A_55_P2339379	72776	Sass6	spindle assembly 6 homolog (C. elegans)	-0.0980373	1.01757	1.20166	-0.0219641	0.882159	1.14376	0.00057383	1.6539	1.70411	0.14679	0.135764	0.348466	2.86721e-08	2.75366e-09	0.831391	1.98487e-07	5.57101e-09	0.995558	2.50873e-11	1.59998e-11	0.167477	0.199778	8.04836	7.95032	9.06593	9.25002	8.18413	8.1847	9.83803	9.88824	8.19515	8.17319	9.07731	9.33891
A_55_P2013268	100040387	Gm13391	predicted gene 13391	0.0798763	1.34932	1.20138	-0.0202161	1.06305	0.918194	-0.0661422	0.922476	1.03113	0.163187	0.199244	0.477068	1.59156e-09	8.35673e-09	0.8561	4.5816e-08	3.26478e-07	0.555005	3.07169e-07	6.94434e-08	0.156403	0.0882267	6.15057	6.23045	7.49989	7.35195	6.34981	6.28367	7.27229	7.38094	6.31376	6.29354	7.37681	7.23195
A_55_P2080562	71302	Arhgap26	Rho GTPase activating protein 26	0.298822	1.32486	1.20097	0.175456	1.30708	0.990055	0.0296058	1.37856	1.78273	0.121321	0.113888	0.0189479	3.77824e-09	1.51279e-08	0.144723	4.58075e-09	2.10191e-07	0.799082	2.13786e-09	4.90126e-11	0.304701	0.334324	8.14418	8.443	9.46904	9.34515	8.25807	8.28768	9.63663	10.0408	8.2655	8.44096	9.57258	9.25556
A_55_P2070611	22717	Zfp59	zinc finger protein 59	0.113214	0.703794	1.19893	0.146085	0.314004	0.666048	0.314617	0.543396	0.928706	-0.0932619	-0.0642083	0.265923	2.3485e-06	1.77004e-09	0.156366	0.005647	4.59391e-06	0.00557364	4.67148e-05	6.38388e-08	0.356392	0.522476	7.56475	7.67797	8.26855	8.76368	7.50054	7.81516	8.04394	8.42925	7.47149	7.61757	7.78549	8.13754
A_55_P1983468	12633	Cflar	CASP8 and FADD-like apoptosis regulator	0.208069	0.884186	1.1959	0.163777	0.939816	1.10323	0.197228	1.10734	1.36009	0.0609017	-0.17184	0.0124149	2.32944e-09	2.73659e-11	0.0414089	9.646e-10	9.13186e-11	0.0167755	8.64078e-11	3.92035e-12	0.421468	0.0334456	8.53606	8.74413	9.42025	9.73196	8.36422	8.56145	9.47156	9.72431	8.59696	8.76074	9.53678	9.70019
A_52_P613241	15894	Icam1	intercellular adhesion molecule 1	-0.0882468	0.350792	1.19542	0.021676	0.439657	1.35744	-0.18463	0.628621	2.45055	0.33282	-0.0641391	0.380901	0.00251756	1.77499e-09	0.827614	0.000378395	2.78406e-10	0.0777807	8.82858e-06	3.56662e-14	0.00370408	0.521797	6.49467	6.40643	6.84546	7.6901	6.43053	6.2459	7.05915	8.88108	6.82749	6.84917	7.26715	8.18494
A_52_P597461	20482	Skil	SKI-like	0.474831	1.27364	1.19349	0.185491	0.966773	0.727363	0.209858	1.03723	1.30132	0.417937	-0.00421538	8.32966e-05	2.27808e-10	5.91395e-10	0.0576126	1.21137e-08	5.64326e-07	0.0342963	4.48076e-09	1.65832e-10	0.000294926	0.963479	8.51369	8.98852	9.78733	9.70718	8.50948	8.71933	9.54671	9.81079	8.93163	9.11712	9.8984	9.65899
A_51_P438805	56338	Txnip	thioredoxin interacting protein	0.415011	0.788212	1.19155	0.0126804	0.497071	0.713666	0.416698	0.761711	0.757982	-0.0941265	0.0903349	0.00765748	2.81819e-05	1.78238e-07	0.926856	0.00215752	8.17202e-05	0.0074619	4.09639e-05	4.31949e-05	0.498731	0.515942	14.5698	14.9848	15.358	15.7614	14.6601	15.0768	15.4219	15.4181	14.4757	14.4884	14.9728	15.1894
A_51_P408430	71355	Col24a1	collagen, type XXIV, alpha 1	-0.0313284	1.38873	1.19154	0.0411651	1.83474	1.30263	0.137828	2.17573	0.993756	0.384945	0.0146855	0.774782	7.98256e-10	7.19746e-09	0.707211	1.27884e-11	2.01649e-09	0.218786	9.5858e-13	8.87568e-08	0.00255255	0.893195	7.45745	7.42612	8.84618	8.64898	7.47213	7.60996	9.64787	8.46589	7.84239	7.88356	9.67713	9.14502
A_55_P2068607	75234	Rnf19b	ring finger protein 19B	0.305679	1.68091	1.19004	0.274849	1.40465	0.781744	0.378574	1.76155	1.33453	0.42839	-0.142008	0.000215718	1.75138e-14	3.54776e-12	0.000579137	2.80912e-13	1.82401e-09	2.31371e-05	8.45604e-15	6.16732e-13	5.54744e-06	0.0418536	13.2599	13.5655	14.9408	14.4499	13.1179	13.4964	14.8794	14.4524	13.6883	13.9631	15.0929	14.47
A_51_P375201	12795	Plk3	polo-like kinase 3	-0.0133106	0.513433	1.18983	-0.138439	0.448206	0.666128	0.163957	0.866129	1.15432	0.241407	-0.230367	0.856704	2.73886e-06	2.27426e-11	0.0745409	1.37309e-05	9.51448e-08	0.0381982	2.43961e-09	3.58275e-11	0.00429667	0.00591225	12.0172	12.0039	12.5306	13.207	11.7868	11.9508	12.6529	12.9411	12.2586	12.1201	12.7068	12.9247
A_55_P2031436	17069	Ly6e	lymphocyte antigen 6 complex, locus E	-0.0843604	0.875714	1.18746	0.20158	1.57243	2.10809	-0.00351355	0.85115	1.18056	-0.37854	-0.191076	0.37752	6.71412e-08	9.16818e-10	0.0455977	1.42613e-11	1.62712e-13	0.970308	9.8678e-08	9.9788e-10	0.000898156	0.0565863	15.0936	15.0093	15.9694	16.2811	14.9026	14.899	15.7537	16.0831	14.7151	14.9167	16.2875	16.8232
A_55_P1994862	234311	Ddx60	DEAD (Asp-Glu-Ala-Asp) box polypeptide 60	0.180889	1.47033	1.18725	0.28588	1.45627	1.01772	0.277611	2.25531	1.3478	-0.0584155	-0.0214138	0.0353562	3.14971e-12	7.88538e-11	0.00225417	3.64513e-12	7.63198e-10	0.00281246	4.30165e-15	1.17734e-11	0.468441	0.7889	6.36998	6.55087	7.8403	7.55723	6.34856	6.62618	8.60387	7.69636	6.31156	6.59744	7.76783	7.32928
A_52_P302345	102294	Cyp4v3	cytochrome P450, family 4, subfamily v, polypeptide 3	0.0164336	1.05866	1.18656	0.184932	1.31312	1.16405	0.0921409	0.814747	1.01862	-0.323175	0.243877	0.898858	3.53803e-07	7.74996e-08	0.165608	1.9258e-08	1.00392e-07	0.479517	9.11027e-06	5.8353e-07	0.0219497	0.0734763	10.7888	10.8052	11.8474	11.9753	11.0326	11.1248	11.8474	12.0513	10.4656	10.6505	11.7787	11.6296
A_51_P393654	241520	Fam171b	family with sequence similarity 171, member B	0.049135	1.28477	1.18552	0.0393049	1.2226	0.853862	-0.0466914	1.18358	0.875791	0.180884	0.162544	0.471233	1.94319e-12	6.59485e-12	0.563218	4.13384e-12	8.69161e-10	0.49322	6.76096e-12	6.00626e-10	0.0153132	0.0267245	10.5015	10.5506	11.7863	11.687	10.6641	10.6174	11.8476	11.5398	10.6824	10.7217	11.905	11.5363
A_55_P1953241	17135	Mafk	v-maf musculoaponeurotic fibrosarcoma oncogene family, protein K (avian)	0.377395	1.89932	1.18433	0.390202	1.98733	1.23525	0.478059	2.13669	1.44578	-0.0679456	-0.246504	0.0154153	3.46863e-10	2.60394e-07	0.0127617	1.77942e-10	1.49006e-07	0.00341543	6.06576e-11	1.73644e-08	0.631798	0.0954827	11.432	11.8094	13.3313	12.6164	11.1855	11.6636	13.3222	12.6313	11.3641	11.7543	13.3514	12.5993
A_55_P2075298	11980	Atp8a1	ATPase, aminophospholipid transporter (APLT), class I, type 8A, member 1	0.255986	1.48848	1.18378	-0.00373816	1.54098	1.14694	-0.188147	1.45009	1.62019	0.0772504	0.193502	0.122464	6.13693e-08	1.24145e-06	0.981289	3.8195e-08	1.84383e-06	0.248066	8.7477e-08	1.90927e-08	0.629206	0.235425	7.88038	8.13637	9.36886	9.06416	8.07388	7.88573	9.52397	9.69407	7.95763	7.95389	9.49861	9.10457
A_55_P2133652	382090	4922501C03Rik	RIKEN cDNA 4922501C03 gene	0.0390813	0.464338	1.1818	0.172624	0.128532	0.760126	0.0465699	0.459036	0.721455	0.201528	0.0796274	0.729488	0.000716895	1.25113e-08	0.139741	0.264165	4.11924e-06	0.680533	0.000791899	7.67469e-06	0.0884762	0.483711	10.8566	10.8957	11.321	12.0384	10.9363	10.9828	11.3953	11.6577	11.0582	11.2308	11.1867	11.8183
A_52_P145767	70675	Vcpip1	valosin containing protein (p97)/p47 complex interacting protein 1	0.297673	1.13521	1.17996	0.0990179	1.08729	0.954342	0.248473	1.36449	0.89487	0.0321981	0.118947	0.00203367	2.28757e-10	1.29155e-10	0.238257	4.31251e-10	2.85732e-09	0.00730287	1.47062e-11	7.14301e-09	0.695563	0.160528	11.1571	11.4548	12.2923	12.3371	11.2761	11.5245	12.6405	12.1709	11.1893	11.2883	12.2766	12.1437
A_66_P106289	245944	Vps54	vacuolar protein sorting 54 (yeast)	0.319239	1.41967	1.17989	0.310573	1.39722	0.768925	-0.175274	1.17178	2.14493	0.193165	0.203683	0.0345607	2.03061e-08	2.49552e-07	0.0390761	2.53337e-08	4.37821e-05	0.222648	2.73282e-07	5.16038e-11	0.181109	0.159781	8.8446	9.16383	10.2643	10.0245	9.04828	8.873	10.2201	11.1932	9.03776	9.34833	10.435	9.80668
A_55_P1994144	207209	Ccdc154	coiled-coil domain containing 154	0.238573	0.614969	1.17981	0.128472	0.432224	0.682229	0.0826737	0.422531	0.774119	-0.0891286	0.0762011	0.0471651	4.56445e-05	1.25459e-08	0.263696	0.00129659	1.44265e-05	0.466761	0.00155777	3.24285e-06	0.43333	0.501813	6.70888	6.94746	7.32385	7.88869	6.78508	6.86776	7.20761	7.5592	6.61975	6.74823	7.05198	7.30198
A_55_P2024245	17769	Mthfr	5,10-methylenetetrahydrofolate reductase	0.126694	0.889913	1.17773	0.124555	0.537737	0.980491	0.143367	0.444787	1.08675	0.110919	-0.0993448	0.458498	6.87316e-05	2.81683e-06	0.465988	0.00534024	2.40819e-05	0.402692	0.0169462	7.40135e-06	0.515464	0.559707	11.5576	11.6843	12.4475	12.7353	11.4583	11.6016	11.9031	12.545	11.6685	11.7931	12.2063	12.649
A_55_P1965861	233147	Zfp939	zinc finger protein 939	0.170021	0.768275	1.17618	0.0909399	0.194113	0.656511	0.282867	0.59349	0.187509	-0.327664	-0.0518408	0.0825896	3.25777e-07	8.77326e-10	0.33652	0.0505687	2.40495e-06	0.00719067	8.09751e-06	0.0579771	0.00258125	0.579993	8.58689	8.75691	9.35516	9.76307	8.53505	8.81792	9.12854	8.72256	8.25923	8.35017	8.45334	8.91574
A_55_P2334927	74564	9130022E09	uncharacterized 9130022E09	0.0767476	0.327469	1.17566	-0.126487	0.241841	0.795266	-0.115855	0.184858	0.737316	0.191384	0.127467	0.232562	7.45111e-05	2.43925e-12	0.0577432	0.00126235	8.35206e-10	0.0795143	0.00872832	2.49341e-09	0.00700583	0.0560374	6.26639	6.34313	6.59386	7.44204	6.39385	6.278	6.57871	7.13117	6.45777	6.33128	6.69961	7.25304
A_51_P510939	66433	Chchd7	coiled-coil-helix-coiled-coil-helix domain containing 7	0.0670298	0.948391	1.17491	0.145203	1.10946	1.1507	0.176921	1.12904	1.37178	-0.267526	-0.102531	0.381943	9.76816e-10	4.14183e-11	0.0693236	9.73709e-11	5.65401e-11	0.0305951	7.50569e-11	4.00412e-12	0.00248393	0.188062	11.6616	11.7286	12.61	12.8365	11.5591	11.736	12.6881	12.9308	11.3941	11.5393	12.5035	12.5448
A_55_P2037338	72469	Plcd3	phospholipase C, delta 3	0.108319	0.778729	1.17405	0.103321	0.353538	0.717088	0.207967	0.897171	1.15364	-0.290688	-0.177435	0.394225	1.10847e-05	6.09049e-08	0.41592	0.011457	2.81785e-05	0.11226	2.03e-06	7.72879e-08	0.0320434	0.17083	11.0704	11.1788	11.8492	12.2445	10.893	11.101	11.7902	12.0467	10.7798	10.8831	11.1333	11.4968
A_66_P134488	16878	Lif	leukemia inhibitory factor	0.722434	1.08695	1.17251	0.289991	0.787912	0.728166	0.637498	1.78879	1.29128	0.0845135	0.281488	9.3404e-05	8.19263e-07	3.07328e-07	0.0541019	3.72849e-05	8.60935e-05	0.000319603	8.6519e-10	8.49875e-08	0.552959	0.0607137	9.75987	10.4823	10.8468	10.9324	10.0414	10.6789	11.8302	11.3326	9.84439	10.1344	10.6323	10.5726
A_55_P2148001	547150	6820431F20Rik	cadherin 11 pseudogene	0.275905	0.878174	1.16989	-0.0540518	0.378907	0.746566	0.149323	0.884427	0.854817	-0.127843	0.271077	0.00107076	1.00485e-09	1.43249e-11	0.445937	5.20399e-05	1.02471e-08	0.0464913	9.06419e-10	1.4849e-09	0.0832244	0.00123945	10.9672	11.2431	11.8453	12.1371	11.2382	11.3876	12.1227	12.0931	10.8393	10.7853	11.2182	11.5859
A_55_P2076580	113868	Acaa1a	acetyl-Coenzyme A acyltransferase 1A	0.193448	1.10043	1.16852	0.266048	1.28961	1.58622	0.102947	1.16482	1.35847	-0.411316	0.0477489	0.0196042	1.0964e-10	4.48158e-11	0.00258627	1.01797e-11	4.34191e-13	0.1863	4.69933e-11	4.63008e-12	4.81425e-05	0.530844	15.2966	15.4901	16.397	16.4651	15.3444	15.4473	16.5092	16.7028	14.8853	15.1513	16.1749	16.4715
A_51_P224064	268807	Klhl38	kelch-like 38	0.1305	0.866042	1.16755	0.0757057	0.587474	0.796474	0.0411124	0.659784	0.738538	-0.00342061	0.0685664	0.0447828	1.49757e-10	1.66917e-12	0.224506	3.8917e-08	5.13639e-10	0.502373	7.71594e-09	1.53992e-09	0.955171	0.269289	7.2042	7.3347	8.07024	8.37175	7.27277	7.31388	7.93255	8.01131	7.20078	7.27649	7.78826	7.99725
A_51_P358462	67752	Ppp1r32	protein phosphatase 1, regulatory subunit 32	-0.127554	0.113122	1.16276	0.0174383	0.157856	0.607296	0.0366905	0.349369	0.928935	-0.113378	-0.0700903	0.186674	0.238815	1.15031e-09	0.85273	0.107119	6.72057e-06	0.696655	0.00166195	2.77684e-08	0.237802	0.459332	7.38413	7.25658	7.49725	8.54689	7.31404	7.35073	7.66341	8.24298	7.27075	7.28819	7.42861	7.87805
A_51_P303217	68527	Ucma	upper zone of growth plate and cartilage matrix associated	-0.0233986	0.559821	1.16226	0.0511994	0.481518	0.870025	-0.0762418	0.617554	0.911683	-0.032585	0.0222823	0.757061	1.27232e-06	4.68462e-11	0.500965	7.96671e-06	3.26275e-09	0.320492	3.61312e-07	1.66613e-09	0.667073	0.768279	6.21067	6.18728	6.77049	7.37293	6.23296	6.15672	6.85051	7.14464	6.17809	6.22929	6.65961	7.04811
A_55_P2090429	13426	Dync1i1	dynein cytoplasmic 1 intermediate chain 1	0.00771635	0.821442	1.16118	0.0109691	0.162276	0.285783	-0.055352	0.485685	0.792316	0.440843	-0.127528	0.944113	1.1679e-06	1.13574e-08	0.920628	0.153833	0.0180089	0.616471	0.000384499	1.83558e-06	0.000907702	0.25654	7.31004	7.31776	8.13149	8.47122	7.18252	7.12716	7.6682	7.97483	7.75089	7.76186	7.91316	8.03667
A_55_P2426799	78713	D530017H19Rik	RIKEN cDNA D530017H19 gene	0.528887	1.16113	1.15948	-0.0558038	0.703999	0.778648	0.425121	0.362329	1.90558	-0.672278	0.0768788	0.0202585	3.64487e-05	3.70175e-05	0.788994	0.00344543	0.0016019	0.0547787	0.0964188	8.10768e-08	0.00476883	0.712647	8.06548	8.59437	9.22661	9.22496	8.14236	8.56748	8.50469	10.0479	7.3932	7.3374	8.0972	8.17185
A_51_P234359	20287	Sct	secretin	-0.00364197	1.32839	1.15779	0.104797	2.15484	2.26303	0.00710689	1.51758	1.83198	-0.70739	-0.237466	0.969916	2.47823e-10	1.83875e-09	0.286717	1.6483e-13	7.73944e-14	0.941338	3.42466e-11	1.98615e-12	1.47637e-06	0.023874	8.22244	8.2188	9.55083	9.38024	7.98498	7.99208	9.50255	9.81696	7.51505	7.61985	9.6699	9.77808
A_55_P1972275	22375	Wars	tryptophanyl-tRNA synthetase	0.245236	1.13786	1.15753	0.189689	1.15288	1.02678	0.194168	0.955034	1.21164	0.335092	-0.0971569	0.00552421	9.7007e-11	7.51775e-11	0.0246545	7.9817e-11	4.41782e-10	0.0219164	1.269e-09	3.80016e-11	0.000470761	0.221956	14.3325	14.5778	15.4704	15.4901	14.2354	14.4295	15.1904	15.447	14.6676	14.8573	15.8205	15.6944
A_52_P107234	328110	Prpf39	PRP39 pre-mRNA processing factor 39 homolog (yeast)	0.0515089	0.571756	1.15613	0.0739954	0.43897	0.859809	0.0610906	0.349367	0.915231	-0.0789298	0.0183118	0.654163	0.000117161	2.12292e-08	0.521288	0.00131705	1.09318e-06	0.595679	0.00698285	4.9144e-07	0.494285	0.873106	10.7942	10.8457	11.366	11.9503	10.8125	10.8736	11.1619	11.7277	10.7153	10.7893	11.1542	11.5751
A_51_P291501	218630	Ccno	cyclin O	-0.111096	0.780005	1.15585	-0.000498948	1.05849	1.25127	0.0637241	0.970575	1.03325	-0.583448	-0.0635204	0.320045	2.19812e-06	1.19265e-08	0.996379	4.04683e-08	3.88092e-09	0.564282	1.31186e-07	5.63054e-08	6.18382e-05	0.565514	9.10744	8.99634	9.88744	10.2633	9.04392	9.10764	10.0145	10.0772	8.52399	8.52349	9.58248	9.77526
A_51_P286737	20296	Ccl2	chemokine (C-C motif) ligand 2	0.435813	1.12474	1.15466	0.297745	0.71939	0.797066	0.392165	1.00448	1.02713	0.387517	0.202747	6.95743e-08	5.78489e-14	3.85304e-14	8.8054e-06	5.24417e-11	1.1243e-11	2.85105e-07	3.30832e-13	2.34779e-13	3.3336e-07	0.000482235	17.5909	18.0267	18.7156	18.7455	17.7936	18.1858	18.7981	18.8208	17.9784	18.2761	18.6978	18.7755
A_51_P353232	21925	Tnnc2	troponin C2, fast	0.153133	0.273402	1.15386	-0.000877896	0.0332732	0.700217	-0.0973678	0.581471	1.09809	0.143807	0.346541	0.185886	0.0253152	1.68505e-08	0.993774	0.767729	1.05507e-05	0.392399	8.1502e-05	3.34921e-08	0.212651	0.00652505	7.15615	7.30928	7.42955	8.31001	7.50269	7.40532	8.08416	8.60078	7.29996	7.29908	7.33323	8.00017
A_55_P2022049	66277	Klf15	Kruppel-like factor 15	0.162795	0.519566	1.15351	-0.0329249	0.166165	0.745479	-0.00792074	0.281558	0.722141	0.356678	0.202678	0.0923308	3.28637e-05	1.01187e-09	0.721908	0.0863476	4.25559e-07	0.931636	0.00696211	6.41974e-07	0.00122694	0.0405346	6.20665	6.36944	6.72621	7.36016	6.40933	6.40141	6.69089	7.13147	6.56333	6.5304	6.72949	7.30881
A_55_P2123841	80892	Zfhx4	zinc finger homeodomain 4	0.226717	1.79684	1.15246	0.102988	1.98238	0.983415	0.0589945	1.84253	0.990912	0.0588166	0.190872	0.0250884	1.53254e-12	1.16203e-09	0.277929	3.40079e-13	1.11934e-08	0.529036	1.04412e-12	1.00598e-08	0.530263	0.0538721	10.1342	10.361	11.9311	11.2867	10.3251	10.3841	12.1677	11.316	10.1931	10.2961	12.1754	11.1765
A_51_P294113	244059	Chd2	chromodomain helicase DNA binding protein 2	0.202963	0.472425	1.15208	-0.0325468	0.249986	0.931017	0.126936	0.522756	1.26368	-0.205989	-0.0645555	0.17523	0.00453369	5.38855e-07	0.822895	0.0998173	7.51195e-06	0.388065	0.00216296	1.60097e-07	0.16925	0.657841	10.363	10.5659	10.8354	11.515	10.2984	10.4253	10.8212	11.5621	10.157	10.1244	10.407	11.088
A_66_P106133	99470	Magi3	membrane associated guanylate kinase, WW and PDZ domain containing 3	0.0350279	0.843584	1.15164	-0.112758	0.854828	0.650421	0.0133129	1.54021	1.12991	-0.124364	0.100264	0.728637	2.65407e-07	3.65508e-09	0.272516	2.22866e-07	6.89128e-06	0.894921	5.187e-11	4.79581e-09	0.228088	0.327278	8.08881	8.12384	8.9324	9.24046	8.18907	8.20239	9.72928	9.31899	7.96445	7.85169	8.81927	8.61487
A_55_P2011084	244183	Trim30b	tripartite motif-containing 30B	0.224138	1.25635	1.15075	0.28526	1.89356	1.76113	0.495311	2.30036	1.41031	-0.781856	0.0670426	0.0593056	4.81968e-09	1.6613e-08	0.0200182	1.15322e-11	3.43164e-11	0.000379261	5.9623e-13	9.1369e-10	2.70587e-06	0.552017	8.65847	8.88261	9.91482	9.80922	8.72551	9.22082	11.0259	10.1358	7.87661	8.16187	9.77017	9.63774
A_52_P582309	53312	Nub1	negative regulator of ubiquitin-like proteins 1	0.458644	1.48864	1.1506	0.535238	1.50774	1.05348	0.139154	1.24064	1.52349	-0.295531	0.0127065	1.08721e-05	7.90456e-13	3.91919e-11	1.69477e-06	6.50194e-13	1.45689e-10	0.0739151	1.26294e-11	5.54414e-13	0.000917413	0.863508	11.7247	12.1833	13.2133	12.8753	11.7374	11.8766	12.978	13.2609	11.4292	11.9644	12.9369	12.4826
A_55_P2125491	22163	Tnfrsf4	tumor necrosis factor receptor superfamily, member 4	0.0153929	0.490913	1.14979	-0.00558296	0.322866	0.629938	-0.0143946	0.147414	1.12257	0.0860578	0.00447891	0.881866	0.00019449	5.51107e-09	0.957003	0.00602296	1.37293e-05	0.889472	0.167578	7.73781e-09	0.411057	0.965499	9.51108	9.52648	10.002	10.6609	9.51556	9.50117	9.66298	10.6381	9.59714	9.59156	9.92001	10.2271
A_55_P1955906	20846	Stat1	signal transducer and activator of transcription 1	0.969871	1.73585	1.14931	0.933032	1.762	1.33967	0.697033	1.5126	0.731037	-0.424037	0.0640036	2.44513e-08	4.92232e-12	2.221e-09	4.17098e-08	3.92258e-12	2.38174e-10	1.90665e-06	3.92164e-11	1.04928e-06	0.000424112	0.512846	7.97894	8.94881	9.71479	9.12825	8.04294	8.73998	9.55554	8.77398	7.5549	8.48793	9.3169	8.89458
A_66_P139267	19664	Rbpj	recombination signal binding protein for immunoglobulin kappa J region	0.266059	0.741244	1.14921	0.152274	0.638596	1.06878	0.264017	1.07399	1.78451	-0.102177	-0.0326441	0.000335328	1.03394e-09	1.47682e-12	0.0192952	8.73493e-09	4.45788e-12	0.000360272	4.14061e-12	1.63676e-15	0.0999517	0.584522	12.3966	12.6627	13.1379	13.5458	12.364	12.628	13.438	14.1485	12.2945	12.4467	12.9331	13.3632
A_52_P179785	192656	Ripk2	receptor (TNFRSF)-interacting serine-threonine kinase 2	0.0736865	1.02681	1.14774	0.0515533	1.34761	1.3073	0.244421	1.47406	1.86956	-0.302153	0.00898776	0.554383	3.04249e-07	6.87678e-08	0.678276	7.41828e-09	1.13797e-08	0.0625143	2.06321e-09	6.31252e-11	0.024919	0.942192	10.6695	10.7432	11.6964	11.8173	10.6785	10.923	12.1526	12.5481	10.3674	10.4189	11.715	11.6747
A_51_P308796	14283	Fosl1	fos-like antigen 1	0.0943861	0.485186	1.14659	0.105805	0.472323	0.912281	0.214648	0.641805	1.86302	-0.101986	-0.536883	0.311949	6.45977e-05	1.01846e-09	0.258978	8.55106e-05	2.6164e-08	0.0305033	2.63533e-06	7.09268e-13	0.275886	2.14833e-05	11.8364	11.9308	12.3216	12.983	11.2995	11.5141	11.9413	13.1625	11.7344	11.8402	12.2067	12.6467
A_55_P2291054	15569	Elavl2	ELAV (embryonic lethal, abnormal vision, Drosophila)-like 2 (Hu antigen B)	-0.113039	0.642442	1.14507	-0.047037	0.565681	0.819565	0.073262	1.14898	1.08037	0.0646987	-0.135171	0.222823	2.18398e-06	8.43867e-10	0.604835	1.00523e-05	9.31962e-08	0.423086	8.03063e-10	1.95879e-09	0.478296	0.148891	6.92346	6.81042	7.5659	8.06853	6.78829	6.86155	7.93727	7.86865	6.98816	6.94112	7.55384	7.80772
A_55_P1996988	214627	Papd5	PAP associated domain containing 5	0.189956	1.00924	1.14473	0.109526	0.53755	0.613956	0.220929	0.866458	0.94456	0.170117	0.0179437	0.106607	1.0954e-07	1.9532e-08	0.338741	0.00018489	4.72178e-05	0.0641485	8.09968e-07	2.64493e-07	0.145198	0.873659	12.006	12.196	13.0153	13.1508	12.024	12.2449	12.8904	12.9685	12.1762	12.2857	12.7137	12.7901
A_55_P2099358	27267	Cars	cysteinyl-tRNA synthetase	0.269489	0.818191	1.14469	0.221646	0.425452	0.727608	0.204875	0.432698	0.931132	0.3211	-0.119448	0.00304559	1.31991e-08	1.02425e-10	0.0111315	4.86951e-05	6.66895e-08	0.0173852	4.05964e-05	2.10297e-09	0.000748585	0.141354	14.6119	14.8814	15.4301	15.7566	14.4925	14.6974	14.9252	15.4236	14.933	15.1547	15.3585	15.6607
A_55_P2004213	245607	Gprasp2	G protein-coupled receptor associated sorting protein 2	-0.0582191	0.584107	1.14438	-0.0101885	0.327457	0.459943	-0.120686	0.479458	0.846448	-0.539376	0.109146	0.557079	1.85711e-05	2.93114e-09	0.917711	0.00390718	0.000227553	0.231761	0.000151478	1.90332e-07	4.47231e-05	0.277502	7.43679	7.37858	8.0209	8.58117	7.54594	7.42526	8.0254	8.39239	6.89742	6.88723	7.22488	7.35736
A_55_P1953593	107522	Ece2	endothelin converting enzyme 2	0.144686	1.44113	1.14349	0.220711	1.28922	1.06605	0.182663	1.41404	1.33177	0.331373	-0.119566	0.149375	7.92236e-11	2.3449e-09	0.034585	4.109e-10	6.37909e-09	0.0739746	1.05049e-10	2.54955e-10	0.00318943	0.228647	12.5943	12.739	14.0355	13.7378	12.4748	12.6574	13.8888	13.8066	12.9257	13.1464	14.2149	13.9918
A_51_P495462	14417	Gad2	glutamic acid decarboxylase 2	-0.00554928	0.485388	1.14216	-0.0688608	0.696915	0.604512	-0.0114142	0.881095	0.865283	-0.152576	-0.129972	0.95402	0.000104863	2.12878e-09	0.477888	1.70435e-06	9.48559e-06	0.905611	8.03343e-08	1.02588e-07	0.126992	0.189169	6.45506	6.44951	6.94045	7.59722	6.32509	6.31367	7.20618	7.19037	6.30248	6.23362	6.9994	6.907
A_51_P204252	211482	Efhb	EF hand domain family, member B	0.164517	1.94215	1.14128	0.278637	2.39852	1.59174	0.138203	1.89214	0.860931	-0.305275	-0.0968818	0.176286	1.72706e-11	3.8346e-08	0.0291991	6.9865e-13	3.33818e-10	0.251933	2.55658e-11	1.56523e-06	0.0184268	0.416933	7.30048	7.465	9.24263	8.44176	7.2036	7.3418	9.09574	8.06453	6.99521	7.27384	9.39373	8.58695
A_55_P2083153	69282	1700001J03Rik	RIKEN cDNA 1700001J03 gene	-0.134171	0.144584	1.14096	0.149177	0.137276	0.707323	0.0883673	0.414922	1.16841	-0.309448	-0.296234	0.134976	0.109173	4.6219e-10	0.0992195	0.126788	3.633e-07	0.315126	0.000174156	3.26087e-10	0.00226706	0.00314211	6.94407	6.8099	7.08866	8.08503	6.64784	6.73621	7.06276	7.81625	6.63463	6.7838	6.7719	7.34195
A_66_P107703	228608	Smox	spermine oxidase	0.305609	0.466046	1.14026	-0.0147492	0.386566	0.69361	0.346484	0.728872	1.45504	0.341699	0.0368214	0.088013	0.0136794	4.6047e-06	0.931185	0.035409	0.000805667	0.0560865	0.000520908	2.10459e-07	0.0591852	0.829418	10.2418	10.5474	10.7079	11.3821	10.2786	10.6251	11.0075	11.7337	10.5835	10.5688	10.9701	11.2771
A_55_P2165074	268749	Rnf31	ring finger protein 31	0.182629	1.28297	1.13789	0.408818	1.47662	1.3754	0.348453	1.60019	1.24304	-0.354262	-0.218113	0.00387609	8.1435e-14	5.1677e-13	1.20869e-06	9.21178e-15	2.77441e-14	8.44981e-06	2.63538e-15	1.32664e-13	6.95641e-06	0.000976337	12.489	12.6716	13.772	13.6269	12.2709	12.6193	13.8711	13.5139	12.1347	12.5435	13.6114	13.5101
A_55_P1987605	260315	Nav3	neuron navigator 3	0.0755008	0.944588	1.13776	-0.138839	0.835667	0.898692	0.0916042	1.47291	1.89901	0.183792	-0.16536	0.469242	8.321e-08	6.30612e-09	0.191765	4.23073e-07	1.62421e-07	0.381776	1.48852e-10	3.27403e-12	0.090096	0.124087	7.23204	7.30754	8.17662	8.3698	7.06668	7.15828	8.53958	8.96569	7.41583	7.27699	8.25149	8.31452
A_55_P2112030	330485	Tmem145	transmembrane protein 145	0.197935	0.824565	1.13747	-0.057246	0.521988	0.592767	-0.0633728	0.572613	0.706965	-0.0702934	-0.0412559	0.149673	1.08556e-05	1.9629e-07	0.667363	0.00106389	0.000345752	0.634467	0.0004751	5.98307e-05	0.598244	0.756431	6.52595	6.72389	7.35052	7.66342	6.4847	6.42133	7.05731	7.19166	6.45566	6.39842	6.97765	7.04843
A_55_P2098354	435684	Shf	Src homology 2 domain containing F	-0.0189703	0.477623	1.13722	0.0728352	0.431644	0.852188	0.0906316	0.553606	1.34726	-0.0645424	-0.0843677	0.802056	8.86294e-06	6.57961e-11	0.342388	2.80313e-05	4.44693e-09	0.241063	1.48172e-06	5.13768e-12	0.398693	0.273748	10.6411	10.6222	11.1188	11.7784	10.5568	10.6474	11.1104	11.904	10.5766	10.6494	11.0082	11.4288
A_55_P2454896	232566	Amn1	antagonist of mitotic exit network 1	0.0602152	1.0843	1.13713	0.0402831	0.931994	0.842055	0.0246253	0.993464	1.07687	-0.251428	-0.0273644	0.389428	3.52262e-11	1.72424e-11	0.562204	3.3312e-10	1.46237e-09	0.722214	1.29776e-10	3.90493e-11	0.00198883	0.692949	12.0121	12.0723	13.0964	13.1492	11.9847	12.0093	12.9782	13.0616	11.7606	11.8009	12.6926	12.6027
A_55_P2171116	16854	Lgals3	lectin, galactose binding, soluble 3	0.0574532	0.0617364	1.13707	0.15108	-0.0686093	0.646874	-0.00320397	-0.1637	1.10774	0.555124	-0.118879	0.502044	0.471206	3.71366e-10	0.0898692	0.42419	9.07243e-07	0.96992	0.0681532	5.44561e-10	5.96785e-06	0.174572	14.5661	14.6235	14.6278	15.7031	14.4472	14.444	14.2835	15.5549	15.1212	15.2723	15.0526	15.768
A_55_P2001218	12519	Cd80	CD80 antigen	-0.00788791	0.931787	1.13529	-0.0341542	1.11491	1.26786	0.00301181	0.834468	0.961906	-0.398084	-0.373296	0.929975	1.42207e-08	8.46288e-10	0.704198	1.10104e-09	1.67392e-10	0.97323	6.51682e-08	9.09741e-09	0.000366605	0.000655071	11.17	11.1621	12.1018	12.3053	10.7967	10.7997	11.6312	11.7586	10.7719	10.7378	11.8868	12.0398
A_55_P1972541	449000	Zfp960	zinc finger protein 960	0.212907	0.748284	1.13351	0.146248	0.253844	0.834244	0.0977565	0.252872	0.492963	-0.172793	0.0848645	0.0507674	1.51072e-06	5.71211e-09	0.166066	0.0228552	3.76197e-07	0.346418	0.0233029	0.000166381	0.105766	0.412078	11.2	11.4129	11.9483	12.3335	11.2849	11.3826	11.5378	11.7778	11.0272	11.1735	11.2811	11.8615
A_51_P101196	19186	Psme1	proteasome (prosome, macropain) activator subunit 1 (PA28 alpha)	-0.0145112	0.944788	1.13313	0.201942	1.60881	1.93807	0.0694786	1.06133	1.09061	-0.418179	0.0370666	0.853929	1.83e-09	1.28077e-10	0.0192753	6.43236e-13	3.64702e-14	0.38366	3.3656e-10	2.25463e-10	6.16325e-05	0.639169	14.4326	14.4181	15.3774	15.5657	14.4697	14.5392	15.531	15.5603	14.0144	14.2164	15.6232	15.9525
A_55_P1983853	12364	Casp12	caspase 12	0.429177	1.24211	1.13138	0.280474	1.3415	1.07052	0.242874	1.08282	0.729584	-0.395543	0.197752	0.00224888	1.46456e-08	5.3242e-08	0.0304227	4.94465e-09	1.12619e-07	0.0564223	9.657e-08	1.36869e-05	0.0040955	0.113417	8.18932	8.6185	9.43143	9.3207	8.38707	8.62994	9.46989	9.11665	7.79378	8.07425	9.13528	8.86429
A_55_P1968743	18033	Nfkb1	nuclear factor of kappa light polypeptide gene enhancer in B cells 1, p105	0.160924	0.840146	1.13125	0.0277919	0.595153	0.776968	0.125494	1.1052	2.22776	0.306018	-0.119814	0.146687	6.20738e-07	1.12028e-08	0.795517	3.78378e-05	1.67137e-06	0.251526	1.55264e-08	4.87205e-13	0.0104696	0.272744	8.58076	8.74168	9.4209	9.71201	8.46094	8.58644	9.56614	10.6887	8.88678	8.91457	9.48193	9.66374
A_51_P456187	18567	Pdcd2	programmed cell death 2	0.0306529	0.757397	1.13082	0.134941	0.429774	0.823426	0.112765	0.664923	1.01188	-0.0970012	-0.100378	0.692894	3.24666e-08	1.02031e-10	0.0958333	3.81739e-05	1.01328e-08	0.158551	1.89286e-07	5.25183e-10	0.221427	0.20651	12.3751	12.4057	13.1325	13.5059	12.2747	12.3875	12.9396	13.2866	12.2781	12.413	12.7079	13.1015
A_52_P51078	13036	Ctsh	cathepsin H	0.0462513	0.762086	1.12871	0.098841	0.728903	0.78658	0.043278	0.644682	1.08043	-0.123662	-0.0255403	0.581986	8.52757e-08	3.26687e-10	0.24739	1.55064e-07	5.54896e-08	0.606266	7.71507e-07	6.1978e-10	0.1526	0.760351	14.6513	14.6976	15.4134	15.78	14.6258	14.6691	15.2705	15.7062	14.5277	14.6265	15.2566	15.3142
A_52_P432881	80721	Slc19a3	solute carrier family 19, member 3	0.121818	1.03768	1.12862	0.0387808	0.925564	0.587666	0.203958	1.28592	0.664524	0.168275	-0.0632904	0.0961409	8.12218e-11	2.31207e-11	0.581232	4.39701e-10	2.5395e-07	0.00925412	3.21505e-12	4.86985e-08	0.0266335	0.371859	6.39224	6.51406	7.42992	7.52086	6.32895	6.5329	7.61486	6.99347	6.56051	6.59929	7.48608	7.14818
A_55_P2083009	106757	Catsperd	catsper channel auxiliary subunit delta	-0.0506934	0.372779	1.12713	-0.12833	0.379509	0.817719	-0.247665	0.305244	1.418	0.136645	-0.0476658	0.554762	0.000422224	4.50856e-10	0.14632	0.000358005	4.32225e-08	0.00951728	0.00226345	1.48303e-11	0.123538	0.578398	9.10355	9.05285	9.47632	10.2307	9.05588	8.80822	9.36112	10.4739	9.24019	9.11186	9.6197	10.0579
A_66_P135106	108116	Slco3a1	solute carrier organic anion transporter family, member 3a1	0.094907	1.06259	1.12677	0.0872671	1.1587	1.39784	0.104054	1.09947	1.31116	-0.00391282	0.0389383	0.0888686	9.02158e-13	3.66994e-13	0.115203	2.38819e-13	1.3113e-14	0.0644443	5.34799e-13	3.53974e-14	0.941365	0.467956	12.7268	12.8217	13.7894	13.8536	12.7657	12.8698	13.8652	14.0769	12.7229	12.8101	13.8816	14.1207
A_55_P2035804	14370	Fzd8	frizzled homolog 8 (Drosophila)	-0.361226	1.38528	1.12624	-0.0537881	1.55363	1.25595	-0.0896958	1.45832	1.74816	-0.250437	-0.326103	0.00160846	1.35518e-10	2.77862e-09	0.57983	2.44775e-11	5.73375e-10	0.360047	6.31331e-11	4.11885e-12	0.0182304	0.00349598	9.16756	8.80633	10.5528	10.2938	8.84145	8.75176	10.2998	10.5896	8.91712	8.86333	10.4707	10.1731
A_66_P101835	12494	Cd38	CD38 antigen	0.0813757	0.913789	1.12603	-0.0631409	0.400668	0.331394	0.0911802	0.756405	0.681896	0.328075	-0.164489	0.521925	1.71198e-06	1.14092e-07	0.618349	0.00534667	0.0169676	0.473784	1.63191e-05	5.12029e-05	0.0179154	0.204346	8.70406	8.78544	9.61785	9.83009	8.53957	8.63076	9.29598	9.22147	9.03214	8.969	9.43281	9.36353
A_55_P2107070	71132	Cabyr	calcium-binding tyrosine-(Y)-phosphorylation regulated (fibrousheathin 2)	0.262458	0.849785	1.12543	0.286426	0.984971	0.81279	0.0731093	0.748282	0.729566	0.08015	-0.0325379	0.0170254	2.18906e-07	4.57559e-09	0.0103258	2.97047e-08	3.92709e-07	0.468678	1.13487e-06	1.56015e-06	0.427734	0.745402	7.13645	7.39891	7.98623	8.26188	7.10391	7.17702	7.85219	7.83348	7.2166	7.50302	8.20157	8.02939
A_51_P477941	30838	Fbxw4	F-box and WD-40 domain protein 4	0.0243262	1.11404	1.12516	0.0344985	1.03507	0.917094	-0.0306457	0.916037	0.858052	-0.259879	-0.0392416	0.715587	1.34615e-11	1.1587e-11	0.606125	4.06264e-11	2.45181e-10	0.646634	2.49385e-10	6.50602e-10	0.00113311	0.558032	11.9439	11.9683	13.058	13.0691	11.9047	11.8741	12.8207	12.7628	11.6841	11.7186	12.7191	12.6012
A_55_P1999878	99683	Sec24b	Sec24 related gene family, member B (S. cerevisiae)	0.228279	1.33752	1.12457	0.0958283	1.21643	0.697612	0.241282	1.21609	1.10973	0.183418	-0.0157062	0.151827	1.63498e-07	1.53882e-06	0.536374	5.67493e-07	0.000301551	0.131261	5.69555e-07	1.81605e-06	0.24411	0.918794	13.3576	13.5859	14.6951	14.4822	13.3419	13.5832	14.558	14.4516	13.541	13.6369	14.7575	14.2387
A_55_P2181429	544767	Gm5782	predicted gene 5782	0.243846	0.8	1.12398	0.0898962	0.683503	0.734044	0.0141236	0.734636	0.662977	0.112595	0.183687	0.00282355	3.81475e-09	2.59293e-11	0.211923	3.47196e-08	1.28861e-08	0.84067	1.27412e-08	5.27442e-08	0.122966	0.0172847	6.21065	6.45449	7.01065	7.33463	6.39433	6.40846	7.12897	7.05731	6.32324	6.41314	7.00674	7.05729
A_66_P104554	16329	Inpp1	inositol polyphosphate-1-phosphatase	0.477871	2.67513	1.12341	0.565385	2.81082	1.37059	0.328923	2.613	1.02744	-0.172	-0.0201596	4.60331e-06	5.33242e-17	3.48484e-11	5.65344e-07	2.45149e-17	1.7202e-12	0.000262511	7.71061e-17	1.31886e-10	0.0267408	0.778466	10.0453	10.5232	12.7204	11.1687	10.0251	10.354	12.6381	11.0526	9.87329	10.4387	12.6841	11.2439
A_55_P2140151	216805	Flcn	folliculin	0.0296687	0.267933	1.12283	0.157741	0.27548	1.09641	-0.121076	0.00483035	0.918647	-0.4001	0.254796	0.657465	0.00088502	1.21639e-11	0.0288887	0.000696388	1.74164e-11	0.0839233	0.942271	2.43223e-10	1.6116e-05	0.00134555	12.1318	12.1615	12.3997	13.2546	12.3866	12.2655	12.3914	13.3052	11.7317	11.8894	12.0072	12.8281
A_55_P1992889	12258	Serping1	serine (or cysteine) peptidase inhibitor, clade G, member 1	-0.150945	0.736624	1.12236	-0.0375214	1.48514	2.38415	0.0516925	1.1365	1.26435	-0.462484	-0.0393655	0.0910507	1.74095e-07	4.70492e-10	0.66076	7.22649e-12	4.96361e-15	0.546549	3.91651e-10	8.10294e-11	4.8798e-05	0.645309	10.9646	10.8137	11.7013	12.087	10.9253	10.977	12.0618	12.1896	10.5022	10.4646	11.9873	12.8863
A_55_P2369534	619297	C430049E01Rik	RIKEN cDNA C430049E01 gene	0.114023	0.310442	1.1222	0.113068	0.492035	0.803555	-0.0506742	0.353704	0.705906	-0.0344454	-0.0436027	0.104023	0.000248596	1.36315e-11	0.106718	1.47493e-06	1.89574e-09	0.454659	6.70389e-05	1.19743e-08	0.609567	0.519034	6.51382	6.62784	6.82426	7.63602	6.47022	6.41954	6.82392	7.17612	6.47938	6.59244	6.97141	7.28293
A_51_P506674	227522	Rpp38	ribonuclease P/MRP 38 subunit	0.208038	0.645944	1.12178	0.0165144	0.157839	0.645043	0.166697	0.390931	0.849574	0.175544	-0.0300552	0.0527671	7.65274e-06	5.46634e-09	0.87013	0.131995	7.77947e-06	0.113089	0.00120523	2.4818e-07	0.0965903	0.766275	12.0062	12.2143	12.6522	13.128	11.9762	12.1429	12.3671	12.8258	12.1818	12.1983	12.3396	12.8268
A_51_P267346	106021	Topors	topoisomerase I binding, arginine/serine-rich	0.284504	0.577166	1.11877	0.0568274	0.264168	0.784884	0.141595	0.800992	1.10624	0.0619126	0.167094	0.0125014	3.31389e-05	7.16114e-09	0.581645	0.0188656	8.57057e-07	0.180316	6.60941e-07	8.39599e-09	0.548679	0.117791	12.0378	12.3223	12.615	13.1566	12.2049	12.3465	13.0059	13.3111	12.0997	12.1566	12.3639	12.8846
A_55_P1973427	83560	Tex14	testis expressed gene 14	0.062604	0.401596	1.11864	0.109434	0.645122	0.694722	-0.0187259	0.519805	0.754904	0.0730248	0.171864	0.386025	3.27954e-05	3.54312e-11	0.138904	9.50115e-08	3.46129e-08	0.793182	1.57944e-06	1.08943e-08	0.314022	0.0264349	6.13873	6.20134	6.54033	7.25737	6.3106	6.29187	6.8304	7.0655	6.21176	6.32119	6.85688	6.90648
A_51_P450888	65079	Rtn4r	reticulon 4 receptor	-0.18126	0.931692	1.1184	0.000396285	1.10756	0.983492	-0.174781	0.764873	0.788695	-0.2898	-0.300627	0.0323752	2.13599e-09	1.48229e-10	0.995973	1.71211e-10	9.77002e-10	0.0381632	3.44554e-08	2.25472e-08	0.001774	0.00132186	7.36049	7.17923	8.29219	8.47889	7.05987	6.88509	7.82474	7.84856	7.07069	7.07109	8.17825	8.05419
A_51_P293688	67844	Rab32	RAB32, member RAS oncogene family	0.0332433	0.603934	1.11771	0.0581519	0.367531	0.937769	-0.00587028	0.831941	1.41116	0.160453	0.22213	0.664565	5.63697e-07	1.00257e-10	0.45094	0.00016926	1.3175e-09	0.938785	7.31169e-09	3.0027e-12	0.0489391	0.00943177	12.1512	12.1845	12.7552	13.2689	12.3734	12.3675	13.2053	13.7845	12.3117	12.3698	12.6792	13.2494
A_55_P2201454	70290	2310079F09Rik	RIKEN cDNA 2310079F09 gene	0.446546	0.957179	1.1164	0.176557	0.961603	0.656115	0.13829	1.47218	0.697202	-0.012632	0.237742	0.0013487	3.55987e-07	4.53381e-08	0.144735	3.35159e-07	3.39331e-05	0.247187	9.05173e-10	1.72528e-05	0.913983	0.0556081	8.04888	8.49542	9.00606	9.16528	8.28662	8.42491	9.7588	8.98382	8.03624	8.2128	8.99785	8.69236
A_55_P2120577	17684	Cited2	Cbp/p300-interacting transactivator, with Glu/Asp-rich carboxy-terminal domain, 2	-0.123417	0.871134	1.11628	-0.142326	1.40714	1.50904	-0.14663	1.32848	1.60858	-0.574411	-0.191602	0.428986	3.2118e-05	1.74825e-06	0.363284	8.59408e-08	3.3088e-08	0.349345	1.85787e-07	1.36217e-08	0.00167085	0.22585	13.302	13.1786	14.1732	14.4183	13.1104	12.9638	14.4389	14.719	12.7276	12.5853	14.1348	14.2366
A_55_P2004867	18788	Serpinb2	serine (or cysteine) peptidase inhibitor, clade B, member 2	0.658755	1.34295	1.11547	0.463874	1.36049	1.06348	0.492357	2.00852	1.98015	-0.372938	-0.558921	0.00014373	2.51345e-08	3.07843e-07	0.00301621	2.0995e-08	5.72695e-07	0.00191979	7.55133e-11	9.33124e-11	0.0126214	0.000671343	10.3319	10.9906	11.6748	11.4473	9.77294	10.2653	11.7815	11.7531	9.95892	10.4228	11.3194	11.0224
A_55_P2047310	18591	Pdgfb	platelet derived growth factor, B polypeptide	0.146781	-0.0736181	1.11463	0.0980143	-0.75576	0.184951	0.0921453	0.136087	1.27095	0.640741	0.192073	0.0759013	0.355146	1.55699e-10	0.223056	4.06002e-08	0.0294494	0.250722	0.0975534	2.19741e-11	3.7106e-07	0.0245067	10.7889	10.9357	10.7153	11.9035	10.981	11.0731	11.1171	12.2519	11.4296	11.5277	10.6739	11.6146
A_65_P15245	18187	Nrp2	neuropilin 2	0.0556634	0.882168	1.11418	0.0325047	0.74171	0.989429	0.211203	1.61308	1.34072	0.533469	0.112101	0.683311	6.5476e-06	3.55219e-07	0.81138	4.65162e-05	1.6204e-06	0.1346	2.16558e-09	2.94447e-08	0.00108735	0.415096	10.9222	10.9778	11.8043	12.0364	11.0343	11.2455	12.6474	12.375	11.4556	11.4881	12.1974	12.4451
A_55_P2356263	77531	Anks1b	ankyrin repeat and sterile alpha motif domain containing 1B	-0.035546	1.16594	1.11409	-0.0517814	1.37098	1.02032	0.0651117	1.3831	0.882071	-0.304593	-0.187671	0.593753	6.33574e-12	1.26033e-11	0.439469	5.35561e-13	4.72022e-11	0.333653	4.67937e-13	4.07855e-10	0.000264694	0.0110905	7.52704	7.4915	8.69298	8.64113	7.33937	7.40448	8.72247	8.22144	7.22245	7.17067	8.59343	8.24277
A_52_P462350	13486	Dr1	down-regulator of transcription 1	0.250215	0.801282	1.11191	-0.00839502	0.776414	0.681158	0.162422	1.20716	0.806915	0.0177165	0.372369	0.139483	0.00013915	3.65669e-06	0.959022	0.000190071	0.000641555	0.327696	1.32525e-06	0.000129709	0.913666	0.0343251	11.5147	11.7649	12.316	12.6266	11.8871	12.0495	13.0942	12.694	11.5324	11.524	12.3088	12.2136
A_55_P2322555	399623	5930433N17Rik	RIKEN cDNA 5930433N17 gene	0.44247	1.18669	1.11168	0.291359	1.19485	0.735578	0.368928	1.40752	0.817191	0.227062	-0.0215551	0.00429063	1.39049e-07	3.29948e-07	0.0436276	1.26856e-07	4.67225e-05	0.013576	1.34148e-08	1.45506e-05	0.107033	0.873204	10.2469	10.6894	11.4336	11.3586	10.2253	10.5943	11.6329	11.0425	10.4739	10.7653	11.6688	11.2095
A_51_P152747	268903	Nrip1	nuclear receptor interacting protein 1	-0.139357	-0.0318112	1.11156	-0.109483	-0.207592	0.752348	0.0133637	0.204587	1.08295	-0.253329	-0.0949064	0.0428158	0.622111	8.13173e-12	0.103043	0.00475664	2.60568e-09	0.835449	0.0052546	1.20578e-11	0.00104185	0.153347	11.2512	11.1119	11.2194	12.3628	11.1563	11.1697	11.3609	12.2393	10.9979	10.8884	10.7903	11.7502
A_55_P1981734	214290	Zcchc6	zinc finger, CCHC domain containing 6	0.209692	1.21086	1.11143	0.200595	1.35605	1.12071	0.150861	1.2129	0.942706	-0.202101	-0.00726577	0.0180323	6.94056e-11	2.47117e-10	0.0227258	1.26997e-11	2.18603e-10	0.0761613	6.76857e-11	2.71102e-09	0.0218753	0.92834	13.0551	13.2648	14.2659	14.1665	13.0478	13.1987	14.2607	13.9905	12.853	13.0536	14.209	13.9737
A_55_P2067226	74192	Arpc5l	actin related protein 2/3 complex, subunit 5-like	0.0509551	0.79611	1.11071	0.25632	0.703625	0.882316	0.110446	0.699588	1.05827	-0.0178795	-0.166157	0.509979	1.45154e-08	1.18061e-10	0.00377137	7.94992e-08	3.38986e-09	0.163532	8.5936e-08	2.41379e-10	0.816057	0.0431504	11.837	11.8879	12.6331	12.9477	11.6708	11.7812	12.3704	12.7291	11.8191	12.0754	12.5227	12.7014
A_66_P124659	226778	Mark1	MAP/microtubule affinity-regulating kinase 1	0.0632432	0.937609	1.1103	0.156896	1.00969	1.14089	0.118652	0.733236	1.31427	0.110557	0.0295583	0.647103	3.62811e-06	4.32944e-07	0.264139	1.45566e-06	3.03588e-07	0.394381	5.95647e-05	4.54903e-08	0.426726	0.830136	10.9656	11.0288	11.9032	12.0759	10.9951	11.1138	11.7284	12.3094	11.0761	11.233	12.0858	12.217
A_55_P2064851	227157	Mpp4	membrane protein, palmitoylated 4 (MAGUK p55 subfamily member 4)	0.0755414	0.0758994	1.1099	0.0212057	0.346375	0.632698	0.0491719	0.253193	0.546237	0.0734889	-0.102295	0.273659	0.271478	1.8039e-11	0.754394	9.02009e-05	6.04537e-08	0.471219	0.00159217	4.27968e-07	0.286418	0.14435	6.92428	6.99982	7.00018	8.03417	6.82198	6.87116	7.07518	7.36822	6.99777	7.01897	7.34414	7.63047
A_51_P486155	18260	Ocln	occludin	-0.00811226	0.535752	1.10932	0.0774164	0.465235	0.709861	0.0501564	0.623588	1.98307	-0.0749026	-0.110691	0.934389	4.77338e-05	4.52736e-09	0.436549	0.00020235	1.81674e-06	0.612202	8.68676e-06	8.04532e-13	0.451309	0.270701	6.28247	6.27436	6.81822	7.39179	6.17178	6.22194	6.79537	8.15485	6.20757	6.28498	6.6728	6.91743
A_51_P234113	107607	Nod1	nucleotide-binding oligomerization domain containing 1	0.423405	2.51511	1.10875	0.483931	2.43446	1.40019	0.307126	2.5978	1.68276	0.220037	-0.00702888	4.72246e-07	1.19559e-18	4.26591e-13	8.03039e-08	1.99802e-18	1.15783e-14	2.3081e-05	7.18011e-19	6.59048e-16	0.000650004	0.894238	11.5136	11.937	14.0287	12.6223	11.5066	11.8137	14.1044	13.1893	11.7336	12.2176	14.1681	13.1338
A_55_P2161675	668917	Zfp133-ps	zinc finger protein 133, pseudogene	0.321032	1.35242	1.10842	0.203298	1.42491	1.02656	0.150705	1.58906	1.69648	0.0879575	0.267135	0.00873243	1.134e-09	1.92153e-08	0.0767324	5.30161e-10	5.53266e-08	0.179777	1.06278e-10	4.00782e-11	0.424883	0.0243825	8.27993	8.60096	9.63234	9.38835	8.54706	8.69777	10.1361	10.2435	8.36788	8.57118	9.79279	9.39445
A_51_P238183	214253	Etnk2	ethanolamine kinase 2	0.0813898	0.179382	1.10831	-0.117085	-0.173917	0.604697	0.0527846	0.133785	1.14306	-0.0584521	-0.014176	0.409529	0.0804917	4.00847e-09	0.240796	0.0892567	1.1132e-05	0.590388	0.183	2.5772e-09	0.551549	0.88456	7.20302	7.28441	7.3824	8.31133	7.18884	7.24162	7.32262	8.3319	7.14456	7.02748	6.97065	7.74926
A_55_P2091147	319160	Hist1h4k	histone cluster 1, H4k	0.456831	1.06511	1.10826	-0.0106163	0.117207	-0.171099	-0.0441137	1.02542	1.70853	0.410171	0.216575	0.0013435	1.16122e-07	6.79069e-08	0.929254	0.334258	0.165504	0.712755	1.92797e-07	1.41162e-10	0.00309228	0.084529	10.3602	10.8171	11.4254	11.4685	10.5768	10.5327	11.6022	12.2853	10.7704	10.7598	10.8876	10.5993
A_52_P212756	240832	Tor1aip2	torsin A interacting protein 2	0.119776	0.897396	1.10758	0.0868583	0.763043	0.705875	0.0172493	1.25159	1.34984	-0.0178367	-0.0481545	0.169567	1.04348e-08	5.08129e-10	0.312319	9.75656e-08	2.7529e-07	0.838453	8.36482e-11	2.70374e-11	0.833039	0.571003	6.48999	6.60977	7.38739	7.59757	6.44184	6.45909	7.69343	7.79168	6.47216	6.55901	7.2352	7.17803
A_55_P2017967	22282	Usf2	upstream transcription factor 2	0.237711	1.20627	1.10691	0.189108	0.966383	1.01246	-0.0587416	1.0017	1.28628	0.0692273	0.164732	0.0155761	3.15714e-10	1.10787e-09	0.0468789	7.74429e-09	3.9974e-09	0.512864	4.6551e-09	1.22294e-10	0.441805	0.0790022	12.882	13.1197	14.0882	13.9889	13.0467	12.988	14.0484	14.333	12.9512	13.1403	13.9176	13.9637
A_52_P237652	72386	2610035D17Rik	RIKEN cDNA 2610035D17 gene	0.0845909	0.49188	1.10597	0.106233	0.216884	0.833607	0.501226	0.708299	1.14907	-0.0675105	-0.373748	0.472566	0.000586136	5.07047e-08	0.369275	0.0776507	2.03787e-06	0.000495235	1.42163e-05	2.99859e-08	0.565291	0.00505525	8.83338	8.91797	9.32526	9.93935	8.45963	8.96086	9.16793	9.6087	8.76587	8.8721	8.98275	9.59948
A_55_P2077133	108737	Oxsr1	oxidative-stress responsive 1	0.169435	0.93932	1.10587	0.0320288	1.00978	0.995052	0.117309	1.11495	1.53096	0.0607303	-0.147924	0.0102747	2.91084e-11	2.46652e-12	0.589785	9.79537e-12	1.22287e-11	0.0611221	2.17757e-12	1.65077e-14	0.312398	0.0218788	11.1335	11.3029	12.0728	12.2394	10.9856	11.1029	12.1005	12.5165	11.1942	11.2262	12.204	12.1893
A_51_P339444	56382	Rab9	RAB9, member RAS oncogene family	0.17375	1.00578	1.10583	0.172162	0.76868	0.936587	-0.0614434	0.635857	0.757059	-0.192634	0.214406	0.0508175	1.73069e-09	4.35844e-10	0.0527244	7.50313e-08	4.80564e-09	0.465878	9.0994e-07	9.22019e-08	0.0325321	0.0191529	13.1989	13.3727	14.2047	14.3047	13.4133	13.3519	14.0492	14.1704	13.0063	13.1784	13.775	13.9429
A_52_P49321	101401	Adamts9	a disintegrin-like and metallopeptidase (reprolysin type) with thrombospondin type 1 motif, 9	0.0719821	0.911526	1.1057	0.0628128	0.540726	0.773531	-0.0701618	0.683069	0.953821	0.822893	0.287577	0.377851	4.2475e-09	2.58036e-10	0.440224	4.34842e-06	4.2265e-08	0.389737	2.25851e-07	2.21882e-09	1.79669e-08	0.0023059	8.8063	8.87828	9.71782	9.912	9.09388	9.02371	9.77694	10.0477	9.62919	9.692	10.1699	10.4027
A_55_P2142830	18081	Ninj1	ninjurin 1	-0.0103452	0.454457	1.10528	0.0474343	0.054665	0.818713	-0.0265228	0.514305	1.446	0.0444838	-0.0201872	0.91678	0.000265196	5.09458e-09	0.633063	0.582638	3.11296e-07	0.788988	7.72225e-05	1.0189e-10	0.65421	0.838513	13.4735	13.4631	13.9279	14.5787	13.4533	13.4268	13.9676	14.8993	13.5179	13.5654	13.5726	14.3367
A_55_P1997225	216439	Agap2	ArfGAP with GTPase domain, ankyrin repeat and PH domain 2	0.114079	1.29584	1.10516	0.0451727	0.605144	0.597131	0.0902657	1.39602	1.25964	-0.389236	-0.194616	0.150973	1.17607e-11	1.27337e-10	0.558601	5.84604e-07	6.93866e-07	0.250042	3.8075e-12	1.80256e-11	9.98059e-05	0.0204801	6.75237	6.86645	8.04821	7.85753	6.55776	6.64802	7.95377	7.8174	6.36314	6.40831	6.96828	6.96027
A_52_P184149	17768	Mthfd2	methylenetetrahydrofolate dehydrogenase (NAD+ dependent), methenyltetrahydrofolate cyclohydrolase	0.297593	0.745071	1.105	-0.0915916	-0.0227884	0.0289341	0.350897	0.77483	1.26473	1.2793	-0.102448	0.0285171	1.81118e-05	1.3572e-07	0.469249	0.855975	0.817802	0.0118847	1.15767e-05	2.15087e-08	1.83395e-08	0.419215	10.7247	11.0223	11.4698	11.8297	10.6223	10.9732	11.3971	11.887	12.004	11.9124	11.9812	12.033
A_65_P17700	80287	Apobec3	apolipoprotein B mRNA editing enzyme, catalytic polypeptide 3	0.164608	1.2296	1.10416	0.0354403	1.50629	1.15379	-0.00500331	1.34308	1.68514	0.119961	0.109703	0.0858467	3.38112e-10	1.62129e-09	0.698566	1.64792e-11	8.57254e-10	0.956297	9.17087e-11	3.0142e-12	0.200768	0.240032	10.0257	10.1903	11.2553	11.1299	10.1354	10.1304	11.4785	11.8205	10.1457	10.1811	11.6519	11.2995
A_52_P596592	237504	Rassf9	Ras association (RalGDS/AF-6) domain family (N-terminal) member 9	-0.0144687	0.723972	1.10202	-0.0536274	0.080027	0.265178	-0.0293393	0.44315	0.582281	-0.72637	0.044119	0.889679	2.86766e-06	1.10821e-08	0.608581	0.447085	0.0201044	0.77871	0.000541242	3.58015e-05	2.75387e-06	0.673114	7.18877	7.1743	7.91274	8.29079	7.23289	7.20355	7.67604	7.81517	6.4624	6.40877	6.54243	6.72758
A_51_P473259	99586	Dpyd	dihydropyrimidine dehydrogenase	-0.0297762	0.278109	1.09981	-0.0793395	0.329824	1.46131	0.0449154	-0.172194	0.749335	-0.584165	0.146152	0.901381	0.256926	0.000272365	0.74164	0.182322	1.37474e-05	0.851769	0.477127	0.00600838	0.0252425	0.545324	8.28131	8.25153	8.55942	9.38111	8.42746	8.47237	8.25527	9.17679	7.69714	7.6178	8.02697	9.15845
A_51_P378667	216853	Wrap53	WD repeat containing, antisense to Trp53	0.24642	0.928249	1.09892	0.210353	0.56231	0.664103	0.143396	0.464576	0.773996	-0.0334982	0.0480373	0.000271555	8.41248e-12	6.43258e-13	0.00111313	1.29755e-08	1.20968e-09	0.0156291	1.76503e-07	1.28082e-10	0.536121	0.378025	12.2025	12.4489	13.1308	13.3014	12.2506	12.394	12.7151	13.0246	12.169	12.3794	12.7313	12.8331
A_51_P389539	110789	Gpr98	G protein-coupled receptor 98	-0.134379	0.634936	1.09642	-0.0417002	0.953854	0.860334	-0.107941	0.861795	0.778935	-0.148172	-0.0446992	0.12509	1.0406e-06	5.64418e-10	0.62222	4.21871e-09	1.80722e-08	0.211933	1.76498e-08	7.09425e-08	0.0933086	0.597615	6.64314	6.50876	7.27807	7.73956	6.59844	6.4905	7.46024	7.37737	6.49497	6.45327	7.44882	7.3553
A_52_P232813	330122	Cxcl3	chemokine (C-X-C motif) ligand 3	-0.106684	-0.0835559	1.09558	0.196076	-0.429232	0.557194	0.0778262	0.370148	1.72401	2.60746	0.205568	0.151041	0.254775	5.36207e-11	0.0136643	1.68557e-05	7.1542e-07	0.287502	8.41646e-05	5.35609e-14	8.45119e-17	0.0103608	7.26555	7.15886	7.18199	8.36112	7.47112	7.54894	7.84126	9.19512	9.873	10.0691	9.44377	10.4302
A_51_P337543	93683	Glce	glucuronyl C5-epimerase	0.253799	0.294323	1.09533	0.0336795	-0.29167	0.131434	0.145544	0.171542	0.82485	0.586543	0.229547	0.0678288	0.0373126	2.85247e-07	0.798154	0.0388348	0.325371	0.277784	0.204061	9.69011e-06	0.000349384	0.0955055	12.6534	12.9072	12.9477	13.7487	12.8829	13.0285	13.0545	13.7078	13.2399	13.2736	12.9483	13.3714
A_52_P438082	12611	Cebpg	CCAAT/enhancer binding protein (C/EBP), gamma	-0.0161045	0.831133	1.09412	-0.0206554	0.475563	0.649123	0.176545	1.05373	0.958825	0.367828	-0.125577	0.812301	1.32252e-09	2.27909e-11	0.760837	2.51051e-06	4.33158e-08	0.0176759	4.00634e-11	1.63218e-10	4.85831e-05	0.0782128	10.2519	10.2358	11.0831	11.346	10.1263	10.3029	11.1801	11.0852	10.6197	10.5991	11.0953	11.2689
A_55_P2114938	16391	Irf9	interferon regulatory factor 9	0.184956	0.928017	1.09356	0.24317	0.72523	0.872551	0.172252	0.884247	0.757465	-0.201008	0.0434851	0.00140527	1.84069e-12	1.48406e-13	0.000115523	7.59161e-11	4.70148e-12	0.00245394	3.84075e-12	3.96611e-11	0.000697423	0.377691	13.7124	13.8974	14.6404	14.806	13.7559	13.9281	14.6401	14.5134	13.5114	13.7546	14.2366	14.3839
A_51_P295420	106205	Zc3h7a	zinc finger CCCH type containing 7 A	0.178155	0.953508	1.09308	0.188332	0.953071	0.632667	0.0962492	0.848786	0.711852	-0.0475518	-0.080145	0.0171428	1.86372e-10	2.43365e-11	0.0125557	1.87638e-10	6.44436e-08	0.169841	1.02467e-09	1.26356e-08	0.487712	0.248706	13.9581	14.1363	14.9116	15.0512	13.878	13.9742	14.7268	14.5898	13.9106	14.0989	14.8636	14.5432
A_55_P2076871	16842	Lef1	lymphoid enhancer binding factor 1	0.277838	0.293133	1.09228	0.0580948	-0.14435	0.257602	0.366499	0.359649	1.51109	0.362776	0.0165891	0.00647597	0.0045122	1.56517e-09	0.521807	0.123288	0.0104111	0.000794515	0.000933568	1.28618e-11	0.000867273	0.853987	9.78022	10.0581	10.0733	10.8725	9.79681	10.1633	10.1565	11.3079	10.143	10.2011	9.99864	10.4006
A_51_P501248	20698	Sphk1	sphingosine kinase 1	0.247659	0.0946122	1.09102	0.196972	-0.149221	0.705801	0.339645	-0.0483981	1.59072	0.181532	-0.173908	0.107476	0.523862	1.30247e-06	0.193786	0.319366	0.000177151	0.0327057	0.743181	8.29958e-09	0.229211	0.248479	13.6674	13.915	13.762	14.7584	13.4935	13.8331	13.4451	15.0842	13.8489	14.0459	13.6997	14.5547
A_52_P533280	19118	Prm1	protamine 1	0.0776483	1.4462	1.09076	0.056963	1.44482	1.3242	0.0951626	1.11787	0.896007	-0.027376	0.0190603	0.55167	5.19381e-09	2.49911e-07	0.661504	5.2646e-09	1.79576e-08	0.466947	1.80571e-07	3.04694e-06	0.832947	0.883204	6.52637	6.60402	7.97257	7.61713	6.54543	6.64059	7.6633	7.44144	6.49899	6.55596	7.94381	7.8232
A_51_P519364	213956	Fam83f	family with sequence similarity 83, member F	0.0681316	0.75611	1.09039	-0.0624802	0.81011	0.852641	0.311825	0.560194	1.61633	-0.204491	-0.360373	0.588959	1.53341e-05	1.62198e-07	0.619969	6.88364e-06	3.73137e-06	0.0226531	0.000345453	6.50593e-10	0.117501	0.0101449	8.39228	8.46041	9.14839	9.48267	8.0319	8.34373	8.5921	9.64824	8.18779	8.12531	8.9979	9.04043
A_55_P2005145	218311	Zfp455	zinc finger protein 455	0.395553	1.55477	1.08978	0.357229	1.33572	1.16256	0.271931	1.07412	0.929064	-0.254693	0.0982959	0.00340819	4.04212e-10	6.24874e-08	0.00685455	3.64492e-09	2.57227e-08	0.0311762	7.60644e-08	5.20156e-07	0.0418119	0.405511	8.39421	8.78977	9.94898	9.484	8.49251	8.76444	9.56663	9.42157	8.13952	8.49675	9.47524	9.30208
A_55_P2043837	74157	Cmtr1	cap methyltransferase 1	0.334086	1.1436	1.08975	0.348557	1.13482	1.02374	0.226489	0.856773	0.821348	-0.233171	0.0173844	0.000245266	3.02927e-11	6.23179e-11	0.000162285	3.40032e-11	1.57698e-10	0.00577402	2.12307e-09	3.88824e-09	0.00474104	0.809842	15.126	15.4601	16.2696	16.2158	15.1434	15.3699	16.0002	15.9648	14.8929	15.2414	16.0277	15.9166
[truncated: 636 more rows]

## Sheet: Fig. 3B
Supplementary Table 4: (genes shown in Figure 3B)
Top 20 genes whose induction by IAV is dependent on RIPK3
[truncated: 23 more rows]

## Sheet: Fig. 3C
Supplementary Table 4: (genes shown in Figure 3C)
Top 20 genes whose downregulation by IAV is dependent on RIPK3
[truncated: 23 more rows]

## Sheet: Fig. 3D
Supplementary Table 4: (genes shown in Figure 3D)
[truncated: 15 more rows]
